# Supplementary material for: Sociodemographic Disparities in Adults with Kidney Failure: A Meta-Analysis
Source: MDPI journal article supplement (doi:10.3390/diseases12010023), 2024-01-12
Supplement: s1 [file s1]

## **Supplementary Materials**

### **Contents**

|                                                                                   |    |
|-----------------------------------------------------------------------------------|----|
| Supplementary S1: Search strategy .....                                           | 3  |
| Supplementary S2: Excluded studies .....                                          | 7  |
| Supplementary S3: Study characteristics .....                                     | 18 |
| Supplementary S4: Risk of bias assessment .....                                   | 39 |
| Supplementary S5: Forest plots .....                                              | 45 |
| 5.1. Arteriovenous fistula/graft vs. Central venous catheter .....                | 45 |
| 5.2. Arteriovenous fistula vs. Arteriovenous graft .....                          | 47 |
| 5.3. Successful arteriovenous fistula use .....                                   | 49 |
| 5.4. Primary arteriovenous fistula patency .....                                  | 50 |
| 5.5. Transition from central venous catheter to arteriovenous fistula/graft ..... | 51 |
| 5.6. Home dialysis .....                                                          | 53 |
| 5.7. Peritoneal dialysis .....                                                    | 54 |
| 5.8. Dialysis survival .....                                                      | 56 |
| 5.9. Waitlisting .....                                                            | 61 |
| 5.10. Kidney transplantation .....                                                | 65 |
| 5.11. Living-donor transplantation .....                                          | 70 |
| 5.12. Deceased-donor transplantation .....                                        | 73 |
| 5.13. Preemptive transplantation .....                                            | 76 |
| 5.14. Graft survival .....                                                        | 77 |
| 5.15. Kidney transplantation survival .....                                       | 80 |
| Supplementary S6: Funnel plots .....                                              | 82 |
| 6.1. Arteriovenous fistula/graft vs. Central venous catheter .....                | 82 |
| 6.2. Arteriovenous fistula vs. Arteriovenous graft .....                          | 84 |
| 6.3. Successful arteriovenous fistula use .....                                   | 86 |
| 6.4. Primary arteriovenous fistula patency .....                                  | 87 |
| 6.5. Transition from central venous catheter to arteriovenous fistula/graft ..... | 88 |
| 6.6. Home dialysis .....                                                          | 90 |
| 6.7. Peritoneal dialysis .....                                                    | 91 |
| 6.8. Dialysis survival .....                                                      | 94 |
| 6.9. Waitlisting .....                                                            | 98 |

|                                             |     |
|---------------------------------------------|-----|
| 6.10. Kidney transplantation.....           | 101 |
| 6.11. Living-donor transplantation .....    | 104 |
| 6.12. Deceased-donor transplantation .....  | 107 |
| 6.13. Preemptive transplantation.....       | 110 |
| 6.14. Graft survival.....                   | 112 |
| 6.15. Kidney transplantation survival ..... | 115 |
| Supplementary S7: Subgroup analyses.....    | 117 |
| Supplementary S8: Sensitivity analysis..... | 130 |
| Supplementary S9: Summary of findings.....  | 131 |
| Supplementary S10: PRISMA checklist .....   | 135 |

## **Supplementary S1: Search strategy**

1. "Continental Population Groups"[Mesh]
2. "Ethnic Groups"[Mesh]
3. "Ethnicity"[Mesh]
4. "Racial Groups"[Mesh]
5. "Race Factors"[Mesh]
6. "Asians"[Mesh]
7. "Whites"[Mesh]
8. "Native Hawaiian or Other Pacific Islander"[Mesh]
9. "Blacks"[Mesh]
10. "Hispanic or Latino"[Mesh]
11. "Minority Groups"[Mesh]
12. (race\* OR racial OR ethnic\* OR white\* OR black\* OR asian\* OR native\* OR indigenous\* OR hispanic\* OR latin\* OR minorit\*) [tiab]
13. OR/1-12
14. "Gender Equity"[Mesh]
15. "Sex"[Mesh]
16. "Sexual and Gender Minorities"[Mesh]
17. (gender OR sex\*) [tiab]
18. OR/15-17
19. "Socioeconomic Factors"[Mesh]
20. "Poverty"[Mesh]
21. "Income"[Mesh]
22. "Education"[Mesh]
23. "Educational Status"[Mesh]
24. "Unemployment"[Mesh]
25. (social\* OR economic\* OR socioeconomic OR socio-economic OR income OR education\* OR occupation\* OR employ\* OR unemploy\* OR poverty OR poor) [tiab]
26. OR/19-25

27. 13 OR 18 OR 26
28. "Health Disparity, Minority and Vulnerable Populations"[Mesh]
29. "Healthcare Disparities"[Mesh]
30. (disparit\* OR inequit\* OR inequality\* OR discrepan\* OR inconsisten\*) [tiab]
31. OR/28-30
32. "Kidney Failure, Chronic"[Mesh]
33. "Renal Dialysis"[Mesh]
34. "Kidney Transplantation"[Mesh]
35. ("end-stage renal disease" OR "end-stage kidney disease" OR dialysis OR hemodialysis OR "peritoneal dialysis" OR "kidney transplant\*" OR "renal transplant\*" OR "arteriovenous fistula" OR "AV fistula" OR "arteriovenous graft" OR "AV graft") [tiab]
36. OR/32-35
37. 27 AND 31 AND 36



## PubMed search

("Continental Population Groups"[Mesh] OR "Ethnic Groups"[Mesh] OR "Ethnicity"[Mesh] OR "Racial Groups"[Mesh] OR "Race Factors"[Mesh] OR "Asians"[Mesh] OR "Whites"[Mesh] OR "Native Hawaiian or Other Pacific Islander"[Mesh] OR "Blacks"[Mesh] OR "Blacks"[Mesh] OR "Hispanic or Latino"[Mesh] OR (race\* OR racial OR ethnic\* OR white\* OR black\* OR asian\* OR native\* OR indigenous\* OR hispanic\* OR latin\* OR minorit\*) [tiab]) OR ("Gender Equity"[Mesh] OR "Sex"[Mesh] OR "Sexual and Gender Minorities"[Mesh] OR (gender OR sex\*) [tiab]) OR ("Socioeconomic Factors"[Mesh] OR "Poverty"[Mesh] OR "Income"[Mesh] OR "Education"[Mesh] OR "Educational Status"[Mesh] OR "Unemployment"[Mesh] OR (social\* OR economic\* OR socioeconomic OR socio-economic OR income OR education\* OR occupation\* OR employ\* OR unemploy\* OR poverty OR poor) [tiab]) AND ("Health Disparity, Minority and Vulnerable Populations"[Mesh] OR "Healthcare Disparities"[Mesh] OR (disparit\* OR inequit\* OR inequality\* OR discrep\* OR inconsisten\*) [tiab]) AND ("Kidney Failure, Chronic"[Mesh] OR "Renal Dialysis"[Mesh] OR "Kidney Transplantation"[Mesh] OR ("end-stage renal disease" OR "end-stage kidney disease" OR dialysis OR hemodialysis OR "peritoneal dialysis" OR "kidney transplant\*" OR "renal transplant\*" OR "arteriovenous fistula" OR "AV fistula" OR "arteriovenous graft" OR "AV graft") [tiab])

**Result** (20 Feb 2022): 3,315 records

## Scopus search

(race\* OR racial OR ethnic\* OR white\* OR black\* OR asian\* OR native\* OR indigenous\* OR hispanic\* OR latin\* OR minorit\* OR gender OR sex OR social\* OR economic\* OR socioeconomic OR socio-economic OR income OR education\* OR occupation\* OR employ\* OR unemploy\* OR poverty OR poor) AND (disparit\* OR inequit\* OR inequality\* OR discrep\* OR inconsisten\*) AND ("end-stage renal disease" OR "end-stage kidney disease" OR dialysis OR hemodialysis OR "peritoneal dialysis" OR "kidney transplant\*" OR "renal transplant\*" OR "arteriovenous fistula" OR "AV fistula" OR "arteriovenous graft" OR "AV graft")

**Result** (20 Feb 2022): 2,416 records

## Web of Science search

(race\* OR racial OR ethnic\* OR white\* OR black\* OR asian\* OR native\* OR indigenous\* OR hispanic\* OR latin\* OR minorit\* OR gender OR sex OR social\* OR economic\* OR socioeconomic OR socio-economic OR income OR education\* OR occupation\* OR employ\* OR unemploy\* OR poverty OR poor) AND (disparit\* OR inequit\* OR inequality\* OR discrep\* OR inconsisten\*) AND ("end-stage renal disease" OR "end-stage kidney disease" OR dialysis OR hemodialysis OR "peritoneal dialysis" OR "kidney transplant\*" OR "renal transplant\*" OR "arteriovenous fistula" OR "AV fistula" OR "arteriovenous graft" OR "AV graft")

**Result** (20 Feb 2022): 2,657 records

## **CENTRAL search**

(race\* OR racial OR ethnic\* OR white\* OR black\* OR asian\* OR native\* OR indigenous\* OR hispanic\* OR latin\* OR minorit\* OR gender OR sex OR social\* OR economic\* OR socioeconomic OR socio-economic OR income OR education\* OR occupation\* OR employ\* OR unemploy\* OR poverty OR poor) AND (disparit\* OR inequit\* OR inequality\* OR discrepan\* OR inconsisten\*) AND ("end-stage renal disease" OR "end-stage kidney disease" OR dialysis OR hemodialysis OR "peritoneal dialysis" OR "kidney transplant\*" OR "renal transplant\*" OR "arteriovenous fistula" OR "AV fistula" OR "arteriovenous graft" OR "AV graft")

**Result** (20 Feb 2022): 100 records

## Supplementary S2: Excluded studies

**Suppl. Table S1.** List of excluded studies with reasons

| <b>Study</b>               | <b>Reason for exclusion</b> |
|----------------------------|-----------------------------|
| <b>2021; Garcia-Garcia</b> | Descriptive study           |
| <b>2021; van Amstel</b>    | Different exposure          |
| <b>2021; Wong</b>          | No outcome of interest      |
| <b>2021; Ku</b>            | Different exposure          |
| <b>2021; Seipp</b>         | No outcome of interest      |
| <b>2021; Davidovits</b>    | Different exposure          |
| <b>2021; Anand</b>         | No outcome of interest      |
| <b>2021; Plumb</b>         | Pediatric population        |
| <b>2020; Grossi</b>        | Evaluation of immigration   |
| <b>2020; Dunlop</b>        | No outcome of interest      |
| <b>2020; Golestaneh</b>    | No outcome of interest      |
| <b>2020; Weigert</b>       | No outcome of interest      |
| <b>2020; Nguyen</b>        | Different exposure          |
| <b>2020; Williams</b>      | Overlapping populations     |
| <b>2020; Bailey</b>        | No outcome of interest      |
| <b>2020; Patzer</b>        | Different exposure          |
| <b>2020; Ku</b>            | Descriptive study           |
| <b>2020; Riad</b>          | Pediatric population        |
| <b>2020; Bonthuis</b>      | Pediatric population        |
| <b>2020; Amaral</b>        | Pediatric population        |
| <b>2019; Godara</b>        | No outcome of interest      |
| <b>2019; Mihçioğur</b>     | No outcome of interest      |
| <b>2019; Mustian</b>       | Different exposure          |
| <b>2019; Pletcher</b>      | Different exposure          |
| <b>2019; Schouten</b>      | Evaluation of immigration   |
| <b>2019; Shah</b>          | Descriptive study           |
| <b>2019; Hamoda</b>        | No outcome of interest      |
| <b>2019; Vedadi</b>        | No outcome of interest      |
| <b>2019; Yan</b>           | Different exposure          |
| <b>2019; Lee</b>           | Overlapping populations     |
| <b>2019; Arvelakis</b>     | No outcome of interest      |
| <b>2019; Kim</b>           | No outcome of interest      |
| <b>2019; Ahearn</b>        | Pediatric population        |
| <b>2018; Markell</b>       | Overlapping populations     |
| <b>2018; Wilkins</b>       | No outcome of interest      |
| <b>2018; Khanal</b>        | Overlapping populations     |
| <b>2018; Gillis</b>        | Different exposure          |
| <b>2018; Gander</b>        | Overlapping populations     |

|                                  |                         |
|----------------------------------|-------------------------|
| <b>2018; Matter</b>              | No outcome of interest  |
| <b>2018; Miller</b>              | Different exposure      |
| <b>2017; Derrett</b>             | No outcome of interest  |
| <b>2017; Woo</b>                 | No outcome of interest  |
| <b>2017; Laster</b>              | Overlapping populations |
| <b>2017; Pecoits-Filho</b>       | Overlapping populations |
| <b>2017; Kwan</b>                | No outcome of interest  |
| <b>2017; Tahir</b>               | No outcome of interest  |
| <b>2017; Wu</b>                  | Different exposure      |
| <b>2017; Taber</b>               | Overlapping populations |
| <b>2017; Ku</b>                  | Pediatric population    |
| <b>2016; Nogueira</b>            | Different exposure      |
| <b>2016; Peracha</b>             | No outcome of interest  |
| <b>2016; Taber</b>               | No outcome of interest  |
| <b>2016; Ng</b>                  | No outcome of interest  |
| <b>2016; Tjaden</b>              | Pediatric population    |
| <b>2016; Hogan</b>               | Pediatric population    |
| <b>2015; Zarkowsky</b>           | Overlapping populations |
| <b>2015; Vogelzang</b>           | No outcome of interest  |
| <b>2015; Tang</b>                | No outcome of interest  |
| <b>2015; Patzer</b>              | No outcome of interest  |
| <b>2015; Saunders</b>            | Different exposure      |
| <b>2015; Monson</b>              | No outcome of interest  |
| <b>2015; Patzer</b>              | Pediatric population    |
| <b>2015; Francis</b>             | Pediatric population    |
| <b>2014; Vavallo</b>             | Different exposure      |
| <b>2014; Rhee</b>                | Overlapping populations |
| <b>2014; Goldfarb-Rumyantzev</b> | Overlapping populations |
| <b>2014; Siracuse</b>            | Overlapping populations |
| <b>2014; Hogan</b>               | No outcome of interest  |
| <b>2014<sup>a</sup>; Grace</b>   | Pediatric population    |
| <b>2014<sup>b</sup>; Grace</b>   | Pediatric population    |
| <b>2013; Fissell</b>             | No outcome of interest  |
| <b>2013; Prakash</b>             | No outcome of interest  |
| <b>2013; Gill</b>                | Overlapping populations |
| <b>2013; Grams</b>               | Overlapping populations |
| <b>2013; Joshi</b>               | No outcome of interest  |
| <b>2013; Andreoni</b>            | Different exposure      |
| <b>2013; Mitsnefes</b>           | Pediatric population    |
| <b>2013; Patzer</b>              | Pediatric population    |
| <b>2012; Liu</b>                 | No outcome of interest  |
| <b>2012; Schaefer</b>            | Different exposure      |
| <b>2012; Arce</b>                | Overlapping populations |

|                                  |                           |
|----------------------------------|---------------------------|
| <b>2012; Johansen</b>            | Overlapping populations   |
| <b>2012; Hall</b>                | Overlapping populations   |
| <b>2012; Myaskovsky</b>          | No outcome of interest    |
| <b>2012; Molnar</b>              | Different exposure        |
| <b>2012; Goldfarb-Rumyantzev</b> | Overlapping populations   |
| <b>2012; Kutner</b>              | No outcome of interest    |
| <b>2012; Amaral</b>              | Overlapping populations   |
| <b>2012; Shatat</b>              | Pediatric population      |
| <b>2012; Patzer</b>              | Pediatric population      |
| <b>2011; Kucirka</b>             | Overlapping populations   |
| <b>2011<sup>a</sup>; Schold</b>  | No outcome of interest    |
| <b>2011<sup>b</sup>; Schold</b>  | Overlapping populations   |
| <b>2011; Nguyen</b>              | Pediatric population      |
| <b>2010; Kalantar-Zadeh</b>      | Different exposure        |
| <b>2010; Walker</b>              | No outcome of interest    |
| <b>2010; Fan</b>                 | Overlapping populations   |
| <b>2009; Frankenfield</b>        | Different exposure        |
| <b>2009; Gore</b>                | Overlapping populations   |
| <b>2009; Segev</b>               | Different exposure        |
| <b>2009; Dudley</b>              | Different exposure        |
| <b>2009; Chavers</b>             | Pediatric population      |
| <b>2008; van den Beukel</b>      | Evaluation of immigration |
| <b>2008; Naghibi</b>             | No outcome of interest    |
| <b>2008; Peterson</b>            | No outcome of interest    |
| <b>2008; Keith</b>               | Overlapping populations   |
| <b>2005; Murthy</b>              | Overlapping populations   |
| <b>2005; Hall</b>                | Different exposure        |
| <b>2004; Prasad</b>              | No outcome of interest    |
| <b>2003; Drukker</b>             | No outcome of interest    |
| <b>2003; Frankenfield</b>        | Overlapping populations   |
| <b>2002; Pisoni</b>              | No outcome of interest    |
| <b>2000; Epstein</b>             | No outcome of interest    |
| <b>1999; Korbet</b>              | No outcome of interest    |
| <b>1999; Isaacs</b>              | No outcome of interest    |
| <b>1997; Bloembergen</b>         | No outcome of interest    |
| <b>1996; Bloembergen</b>         | No outcome of interest    |
| <b>1995; Nee</b>                 | Overlapping populations   |
| <b>1990; Port</b>                | No outcome of interest    |

## Excluded studies

1. Ahearn P, Johansen KL, Tan JC, McCulloch CE, Grimes BA, Ku E. Sex Disparity in Deceased-Donor Kidney Transplant Access by Cause of Kidney Disease. *Clin J Am Soc Nephrol* [Internet]. 2021 Feb 8 [cited 2022 May 29];16(2):241–50. Available from: <https://pubmed.ncbi.nlm.nih.gov/33500250/>
2. Amaral S, McCulloch CE, Black E, Winnicki E, Lee B, Roll GR, et al. Trends in Living Donation by Race and Ethnicity Among Children With End-stage Renal Disease in the United States, 1995-2015. *Transplant direct* [Internet]. 2020 [cited 2022 Jun 4];6(7). Available from: <https://pubmed.ncbi.nlm.nih.gov/32766425/>
3. Amaral S, Patzer RE, Kutner N, McClellan W. Racial disparities in access to pediatric kidney transplantation since share 35. *J Am Soc Nephrol* [Internet]. 2012 Jun [cited 2022 Feb 19];23(6):1069–77. Available from: <https://pubmed.ncbi.nlm.nih.gov/22539831/>
4. Anand A, Malik TH, Dunson J, McDonald MF, Christmann CR, Galvan NTN, et al. Factors associated with long-term graft survival in pediatric kidney transplant recipients. *Pediatr Transplant* [Internet]. 2021 Jun 1 [cited 2022 Feb 19];25(4). Available from: <https://pubmed.ncbi.nlm.nih.gov/33704871/>
5. Andreoni KA, Forbes R, Andreoni RM, Phillips G, Stewart H, Ferris M. Age-Related Kidney Transplant Outcomes: Health Disparities Amplified in Adolescence. *JAMA Intern Med* [Internet]. 2013 Sep 9 [cited 2022 Feb 19];173(16):1524–32. Available from: <https://jamanetwork.com/journals/jamainternalmedicine/fullarticle/1722507>
6. Arce CM, Mitani AA, Goldstein BA, Winkelmayer WC. Hispanic Ethnicity and Vascular Access Use in Patients Initiating Hemodialysis in the United States. *Clin J Am Soc Nephrol* [Internet]. 2012 Feb 1 [cited 2022 Jan 26];7(2):289. Available from: <https://pubmed.ncbi.nlm.nih.gov/2280024/>
7. Arvelakis A, Lerner S, Wadhera V, Delaney V, Ames S, Benvenisty A, et al. Different outcomes after kidney transplantation between African Americans and Whites: A matter of income? A single-center study. *Clin Transplant* [Internet]. 2019 Nov 1 [cited 2022 Feb 5];33(11):e13725. Available from: <https://onlinelibrary.wiley.com/doi/full/10.1111/ctr.13725>
8. Bailey PK, Caskey FJ, MacNeill S, Tomson CRV, Dor FJMF, Ben-Shlomo Y. Mediators of Socioeconomic Inequity in Living-donor Kidney Transplantation: Results From a UK Multicenter Case-Control Study. *Transplant direct* [Internet]. 2020 [cited 2022 Feb 5];6(4). Available from: <https://pubmed.ncbi.nlm.nih.gov/32309626/>
9. Bloembergen WE, Port FK, Mauger EA, Briggs JP, Leichtman AB. Gender discrepancies in living related renal transplant donors and recipients. *J Am Soc Nephrol*. 1996 Aug;7(8):1139–44.
10. Bloembergen WE, Mauger EA, Wolfe RA, Port FK. Association of gender and access to cadaveric renal transplantation. *Am J Kidney Dis* [Internet]. 1997 [cited 2022 Feb 19];30(6):733–8. Available from: <https://pubmed.ncbi.nlm.nih.gov/9398115/>
11. Bonthuis M, Cuperus L, Chesnaye NC, Akman S, Melgar AA, Baiko S, et al. Results in the ESPN/ERA-EDTA Registry suggest disparities in access to kidney transplantation but little variation in graft survival of children across Europe. *Kidney Int*. 2020 Aug;98(2):464–75.
12. Chavers BM, Snyder JJ, Skeans MA, Weinhandl ED, Kasiske BL. Racial disparity trends for graft failure in the US pediatric kidney transplant population, 1980-2004. *Am J Transplant* [Internet]. 2009 Mar [cited 2022 Jun 4];9(3):543–9. Available from: <https://pubmed.ncbi.nlm.nih.gov/19260833/>
13. Davidovits M, Reisman L, Cleper R, Bar-Nathan N, Krause I, Dagan A, et al. Long-term outcomes during 37 years of pediatric kidney transplantation: a cohort study comparing ethnic groups. *Pediatr Nephrol* [Internet]. 2021 Jul 1 [cited 2022 Feb 19];36(7):1881–8. Available from: <https://pubmed.ncbi.nlm.nih.gov/33459932/>
14. Derrett S, Samaranyaka A, Schollum JBW, McNoe B, Marshall MR, Williams S, et al. Predictors of Health Deterioration Among Older Adults After 12 Months of Dialysis Therapy: A Longitudinal Cohort Study From New Zealand. *Am J Kidney Dis*. 2017 Dec 1;70(6):798–806.
15. Drukker A, Feinstein S, Rinat C, Rotem-Braun A, Frishberg Y. Cadaver-Donor Renal Transplantation of Children in Israel (1990–2001): Racial Disparities in Health Care Delivery? *Pediatrics* [Internet]. 2003 Aug 1 [cited 2022 Jan 26];112(2):341–4. Available from: <https://pubmed.ncbi.nlm.nih.gov/1222341/>

16. Dudley CRK, Johnson RJ, Thomas HL, Ramanan R, Ansell D. Factors that influence access to the national renal transplant waiting list. *Transplantation* [Internet]. 2009 Jul [cited 2022 Feb 19];88(1):96–102. Available from: [https://journals.lww.com/transplantjournal/Fulltext/2009/07150/Factors\\_That\\_Influence\\_Access\\_to\\_the\\_National.16.aspx](https://journals.lww.com/transplantjournal/Fulltext/2009/07150/Factors_That_Influence_Access_to_the_National.16.aspx)
17. Dunlop WA, Secombe PJ, Agostino J, Haren F van. Characteristics and outcomes of Aboriginal and Torres Strait Islander patients with dialysis-dependent kidney disease in Australian Intensive Care Units. *Intern Med J* [Internet]. 2020 Oct 4 [cited 2022 Jan 26]; Available from: <https://onlinelibrary.wiley.com/doi/full/10.1111/imj.15077>
18. Epstein AM, Ayanian JZ, Keogh JH, Noonan SJ, Armistead N, Cleary PD, et al. Racial Disparities in Access to Renal Transplantation — Clinically Appropriate or Due to Underuse or Overuse? *N Engl J Med* [Internet]. 2000 Nov 23 [cited 2022 Jan 26];343(21):1537. Available from: [/pmc/articles/PMC4598055/](https://pubmed.ncbi.nlm.nih.gov/1150157/)
19. Fan PY, Ashby VB, Fuller DS, Boulware LE, Kao A, Norman SP, et al. Access and Outcomes Among Minority Transplant Patients, 1999–2008, with a Focus on Determinants of Kidney Graft Survival. *Am J Transplant* [Internet]. 2010 Apr [cited 2022 Feb 19];10(4 0 2):1090. Available from: [/pmc/articles/PMC3644053/](https://pubmed.ncbi.nlm.nih.gov/19150157/)
20. Fissell RB, Fuller DS, Morgenstern H, Gillespie BW, Mendelssohn DC, Rayner HC, et al. Hemodialysis patient preference for type of vascular access: Variation and predictors across countries in the DOPPS. *J Vasc Access* [Internet]. 2013 Jul 4 [cited 2022 Jan 26];14(3):264–72. Available from: <https://journals.sagepub.com/doi/10.5301/jva.5000140>
21. Francis A, Didsbury M, Lim WH, Kim S, White S, Craig JC, et al. The impact of socioeconomic status and geographic remoteness on access to pre-emptive kidney transplantation and transplant outcomes among children. *Pediatr Nephrol* [Internet]. 2016 Dec 21 [cited 2022 Jun 4];31(6):1011–9. Available from: <https://pubmed.ncbi.nlm.nih.gov/26692022/>
22. Frankenfield DL, Krishnan SM, Ashby VB, Shearon TH, Rocco M V., Saran R. Differences in mortality among Mexican-American, Puerto Rican, and Cuban-American dialysis patients in the United States. *Am J Kidney Dis* [Internet]. 2009 Apr [cited 2022 Jan 26];53(4):647–57. Available from: <https://pubmed.ncbi.nlm.nih.gov/19150157/>
23. Frankenfield DL, Rocco M V., Roman SH, McClellan WM. Survival advantage for adult Hispanic hemodialysis patients? Findings from the end-stage renal disease clinical performance measures project. *J Am Soc Nephrol* [Internet]. 2003 Jan 1 [cited 2022 Jan 26];14(1):180–6. Available from: <https://pubmed.ncbi.nlm.nih.gov/12506150/>
24. Gander JC, Zhang X, Plantinga L, Paul S, Basu M, Pastan SO, et al. Racial disparities in preemptive referral for kidney transplantation in Georgia. *Clin Transplant* [Internet]. 2018 Sep 1 [cited 2022 Feb 18];32(9):e13380. Available from: <https://onlinelibrary.wiley.com/doi/full/10.1111/ctr.13380>
25. Garcia-Garcia G, Tonelli M, Ibarra-Hernandez M, Chavez-Iñiguez JS, Oseguera-Vizcaino MC. Access to kidney transplantation in Mexico, 2007–2019: a call to end disparities in transplant care. *BMC Nephrol* [Internet]. 2021 Dec 1 [cited 2022 Jan 26];22(1):1–12. Available from: <https://bmcnephrol.biomedcentral.com/articles/10.1186/s12882-021-02294-1>
26. Gill J, Dong J, Rose C, Johnston O, Landsberg D, Gill J. The effect of race and income on living kidney donation in the United States. *J Am Soc Nephrol* [Internet]. 2013 Nov 1 [cited 2022 Feb 18];24(11):1872–9. Available from: <https://jasn.asnjournals.org/content/24/11/1872>
27. Gillis KA, Lees JS, Ralston MR, Glen JA, Stevenson KS, McManus SK, et al. Interaction between socioeconomic deprivation and likelihood of pre-emptive transplantation: influence of competing risks and referral characteristics – a retrospective study. *Transpl Int* [Internet]. 2019 Feb 1 [cited 2022 Feb 18];32(2):153–62. Available from: <https://onlinelibrary.wiley.com/doi/full/10.1111/tri.13336>
28. Godara S, Jeswani J. Women donate, men receive: gender disparity among renal donors. *Saudi J Kidney Dis Transpl* [Internet]. 2019 Nov 1 [cited 2022 Jan 26];30(6):1439–41. Available from: <https://pubmed.ncbi.nlm.nih.gov/31929292/>
29. Goldfarb-Rumyantzev AS, Sandhu GS, Baird B, Barenbaum A, Yoon JH, Dimitri N, et al. Effect of education on racial disparities in access to kidney transplantation. *Clin Transplant* [Internet]. 2012 Jan [cited 2022 Feb 19];26(1):74–81. Available from: <https://pubmed.ncbi.nlm.nih.gov/21198857/>
30. Goldfarb-Rumyantzev AS, Syed W, Patibandla BK, Narra A, Desilva R, Chawla V, et al. Geographic disparities in arteriovenous fistula placement in patients approaching hemodialysis in the United States. *Hemodial Int* [Internet]. 2014 Jul 1 [cited 2022 Jan 26];18(3):686–94. Available from: <https://onlinelibrary.wiley.com/doi/full/10.1111/hdi.12141>

31. Golestaneh L, Cavanaugh KL, Lo Y, Karaboyas A, Melamed ML, Johns TS, et al. Community Racial Composition and Hospitalization Among Patients Receiving In-Center Hemodialysis. *Am J Kidney Dis* [Internet]. 2020 Dec 1 [cited 2022 Jan 26];76(6):754. Available from: [/pmc/articles/PMC7844565/](https://pubmed.ncbi.nlm.nih.gov/33127883/)
32. Gore JL, Danovitch GM, Litwin MS, Pham PTT, Singer JS. Disparities in the utilization of live donor renal transplantation. *Am J Transplant* [Internet]. 2009 May [cited 2022 Feb 19];9(5):1124–33. Available from: <https://pubmed.ncbi.nlm.nih.gov/19422338/>
33. Grace BS, Kara T, Kennedy SE, McDonald SP. Racial disparities in pediatric kidney transplantation in New Zealand. *Pediatr Transplant* [Internet]. 2014 [cited 2022 Jun 4];18(7):689–97. Available from: <https://pubmed.ncbi.nlm.nih.gov/25039826/>
34. Grace BS, Kennedy SE, Clayton PA, McDonald SP. Racial disparities in paediatric kidney transplantation. *Pediatr Nephrol* [Internet]. 2014 Jan [cited 2022 Jun 4];29(1):125–32. Available from: <https://pubmed.ncbi.nlm.nih.gov/23928908/>
35. Grams ME, Po-Han BC, Coresh J, Segev DL. Preemptive deceased donor kidney transplantation: considerations of equity and utility. *Clin J Am Soc Nephrol* [Internet]. 2013 Apr 5 [cited 2022 Feb 18];8(4):575–82. Available from: <https://pubmed.ncbi.nlm.nih.gov/23371953/>
36. Grossi AA, Maggiore U, Puoti F, Grossi PA, Picozzi M, Cardillo M. Association of immigration background with kidney graft function in a publicly funded health system: a nationwide retrospective cohort study in Italy. *Transpl Int* [Internet]. 2020 Nov 1 [cited 2022 Jan 26];33(11):1405–16. Available from: <https://onlinelibrary.wiley.com/doi/full/10.1111/tri.13688>
37. Hall EC, James NT, Garonzik Wang JM, Berger JC, Montgomery RA, Dagher NN, et al. Center-Level Factors and Racial Disparities in Living Donor Kidney Transplantation. *Am J Kidney Dis* [Internet]. 2012 Jun 1 [cited 2022 Feb 18];59(6):849–57. Available from: <http://www.ajkd.org/article/S0272638612001084/fulltext>
38. Hall YN, Sugihara JG, Go AS, Chertow GM. Differential mortality and transplantation rates among Asians and Pacific Islanders with ESRD. *J Am Soc Nephrol* [Internet]. 2005 [cited 2022 Feb 19];16(12):3711–20. Available from: <https://pubmed.ncbi.nlm.nih.gov/16236803/>
39. Hamoda RE, McPherson LJ, Lipford K, Jacob Arriola K, Plantinga L, Gander JC, et al. Association of sociocultural factors with initiation of the kidney transplant evaluation process. *Am J Transplant* [Internet]. 2020 Jan 1 [cited 2022 Jan 26];20(1):190–203. Available from: <https://pubmed.ncbi.nlm.nih.gov/31278832/>
40. Hogan J, Couchoud C, Bonthuis M, Groothoff JW, Jager KJ, Schaefer F, et al. Gender Disparities in Access to Pediatric Renal Transplantation in Europe: Data From the ESPN/ERA-EDTA Registry. *Am J Transplant* [Internet]. 2016 Jul 1 [cited 2022 Jun 4];16(7):2097–105. Available from: <https://pubmed.ncbi.nlm.nih.gov/26783738/>
41. Hogan J, Savoye E, Macher MA, Bachetta J, Garaix F, Lahoche A, et al. Rapid access to renal transplant waiting list in children: impact of patient and centre characteristics in France. *Nephrol Dial Transplant* [Internet]. 2014 Oct 1 [cited 2022 Feb 19];29(10):1973–9. Available from: <https://academic.oup.com/ndt/article/29/10/1973/1900073>
42. Isaacs RB, Nock SL, Spencer CE, Connors J, Wang XQ, Sawyer R, et al. Racial disparities in renal transplant outcomes. *Am J Kidney Dis* [Internet]. 1999 [cited 2022 Feb 19];34(4):706–12. Available from: <https://pubmed.ncbi.nlm.nih.gov/10516353/>
43. Johansen KL, Zhang R, Huang Y, Patzer RE, Kutner NG. Association of race and insurance type with delayed assessment for kidney transplantation among patients initiating dialysis in the United States. *Clin J Am Soc Nephrol* [Internet]. 2012 Sep 1 [cited 2022 Feb 18];7(9):1490–7. Available from: <https://pubmed.ncbi.nlm.nih.gov/22837273/>
44. Joshi S, Gaynor JJ, Bayers S, Guerra G, Eldefrawy A, Chediak Z, et al. Disparities among Blacks, Hispanics, and Whites in time from starting dialysis to kidney transplant waitlisting. *Transplantation* [Internet]. 2013 Jan 27 [cited 2022 Feb 18];95(2):309–18. Available from: <https://pubmed.ncbi.nlm.nih.gov/23325005/>
45. Kalantar-Zadeh K, Golan E, Shohat T, Streja E, Norris KC, Kopple JD. Survival Disparities within American and Israeli Dialysis Populations: Learning from Similarities and Distinctions across Race and Ethnicity. *Semin Dial* [Internet]. 2010 Nov [cited 2022 Jan 26];23(6):586. Available from: [/pmc/articles/PMC3618910/](https://pubmed.ncbi.nlm.nih.gov/20618910/)
46. Keith D, Ashby VB, Port FK, Leichtman AB. Insurance Type and Minority Status Associated with Large Disparities in Prelisting Dialysis among Candidates for Kidney Transplantation. *Clin J Am Soc Nephrol* [Internet]. 2008 Mar 1 [cited 2022 Feb 19];3(2):463–70. Available from: <https://cjasn.asnjournals.org/content/3/2/463>



47. Khanal N, Lawton PD, Cass A, McDonald SP. Disparity of access to kidney transplantation by Indigenous and non-Indigenous Australians. *Med J Aust* [Internet]. 2018 Sep 1 [cited 2022 Feb 18];209(6):261–6. Available from: <https://onlinelibrary.wiley.com/doi/full/10.5694/mja18.00304>
48. Kim SJ, Gill JS, Knoll G, Campbell P, Cantarovich M, Cole E, et al. Referral for kidney transplantation in Canadian provinces. *J Am Soc Nephrol* [Internet]. 2019 Sep 1 [cited 2022 Feb 5];30(9):1708–21. Available from: <https://pubmed.ncbi.nlm.nih.gov/32672260/>
49. Korbet SM, Shih D, Cline KN, Vonesh EF. Racial differences in survival in an urban peritoneal dialysis program. *Am J Kidney Dis*. 1999 Oct 1;34(4):713–20.
50. Ku E, Ku E, Ku E, Lee BK, McCulloch CE, Roll GR, et al. Racial and ethnic disparities in kidney transplant access within a theoretical context of medical eligibility. *Transplantation* [Internet]. 2020 [cited 2022 Feb 5];1437–44. Available from: [https://journals.lww.com/transplantjournal/Fulltext/2020/07000/Racial\\_and\\_Ethnic\\_Disparities\\_in\\_Kidney\\_Transplant.24.aspx](https://journals.lww.com/transplantjournal/Fulltext/2020/07000/Racial_and_Ethnic_Disparities_in_Kidney_Transplant.24.aspx)
51. Ku E, McCulloch CE, Adey DB, Li L, Johansen KL. Racial Disparities in Eligibility for Preemptive Waitlisting for Kidney Transplantation and Modification of eGFR Thresholds to Equalize Waitlist Time. *J Am Soc Nephrol* [Internet]. 2021 Mar 1 [cited 2022 Feb 5];32(3):677–85. Available from: <https://jasn.asnjournals.org/content/32/3/677>
52. Ku E, McCulloch CE, Grimes BA, Johansen KL. Racial and Ethnic Disparities in Survival of Children with ESRD. *J Am Soc Nephrol* [Internet]. 2017 May 1 [cited 2022 Jun 4];28(5):1584–91. Available from: <https://pubmed.ncbi.nlm.nih.gov/28034898/>
53. Kucirka LM, Grams ME, Lessler J, Hall EC, James N, Massie AB, et al. Age and Racial Disparities in Dialysis Survival. *JAMA* [Internet]. 2011 Aug 10 [cited 2022 Jan 26];306(6):620. Available from: <https://pubmed.ncbi.nlm.nih.gov/2138098/>
54. Kutner NG, Zhang R, Huang Y, Johansen KL. Impact of Race on Predialysis Discussions and Kidney Transplant Preemptive Wait-Listing. *Am J Nephrol* [Internet]. 2012 May [cited 2022 Feb 19];35(4):305–11. Available from: <https://www.karger.com/Article/FullText/336891>
55. Kwan JM, Hajjiri Z, Chen YF, Metwally A, Perkins DL, Finn PW. Donor and Recipient Ethnicity Impacts Renal Graft Adverse Outcomes. *J Racial Ethn Heal Disparities* [Internet]. 2018 Oct 1 [cited 2022 Feb 18];5(5):1003–13. Available from: <https://link.springer.com/article/10.1007/s40615-017-0447-9>
56. Laster M, Soohoo M, Hall C, Streja E, Rhee CM, Ravel VA, et al. Racial-Ethnic Disparities in Mortality and Kidney Transplant Outcomes Among Pediatric Dialysis Patients. *Pediatr Nephrol* [Internet]. 2017 Apr 1 [cited 2022 Jan 26];32(4):685. Available from: <https://pubmed.ncbi.nlm.nih.gov/28034898/>
57. Lee T, Qian J, Thamer M, Allon M. Gender Disparities in Vascular Access Surgical Outcomes in Elderly Hemodialysis Patients. *Am J Nephrol* [Internet]. 2019 Jan 1 [cited 2022 Jan 26];49(1):11–9. Available from: <https://pubmed.ncbi.nlm.nih.gov/30544112/>
58. Liu G, Li X, Liu T, Zhao X, Zhang S, Wang J, et al. Gender disparity of living donor renal transplantation in East China. *Clin Transplant* [Internet]. 2013 Jan 1 [cited 2022 Jan 26];27(1):98–103. Available from: <https://onlinelibrary.wiley.com/doi/full/10.1111/ctr.12003>
59. Markell M, Brar A, Stefanov DG, Salifu MO. Gender disparity in fistula use at initiation of hemodialysis varies markedly across ESRD networks—Analysis of USRDS data. *Hemodial Int* [Internet]. 2018 Apr 1 [cited 2022 Jan 26];22(2):168–75. Available from: <https://onlinelibrary.wiley.com/doi/full/10.1111/hdi.12579>
60. Matter YE, Elhadeedy MA, Abbas TM, Zahab MA, Fouda MA, Refaie AF, et al. Impact of Sex Disparities on Outcomes of Living-Donor Kidney Transplant in Egypt: Data of 979 Patients. *Exp Clin Transplant* [Internet]. 2018 Apr 1 [cited 2022 Feb 18];16(2):133–7. Available from: <https://pubmed.ncbi.nlm.nih.gov/28760116/>
61. Mıhçıkur S, Soy EHA, Türkçelik E, Akın A, Haberal M. Gender Disparity and the Relationship Between Living Donors and Recipients in Kidney Transplants in an Organ Transplant Center in Turkey. *Exp Clin Transplant* [Internet]. 2019 [cited 2022 Jan 26];17(Suppl 1):246–9. Available from: <https://pubmed.ncbi.nlm.nih.gov/30777567/>
62. Miller R, Akatch C, Thompson N, Tumin D, Hayes D, Black SM, et al. County socioeconomic characteristics and pediatric renal transplantation outcomes. *Pediatr Nephrol* [Internet]. 2018 Jul 1 [cited 2022 Feb 19];33(7):1227–34. Available from: <https://pubmed.ncbi.nlm.nih.gov/29532229/>

63. Mitsnefes MM, Laskin BL, Dahhou M, Zhang X, Foster BJ. Mortality risk among children initially treated with dialysis for end-stage kidney disease, 1990-2010. *JAMA* [Internet]. 2013 May 8 [cited 2022 Jun 4];309(18):1921–9. Available from: <https://pubmed.ncbi.nlm.nih.gov/23645144/>
64. Molnar MZ, Langer RM, Rempert A, Czira ME, Rajczyk K, Kalantar-Zadeh K, et al. Roma ethnicity and clinical outcomes in kidney transplant recipients. *Int Urol Nephrol* [Internet]. 2012 Jun [cited 2022 Feb 19];44(3):945–54. Available from: <https://pubmed.ncbi.nlm.nih.gov/22116678/>
65. Monson RS, Kemerley P, Walczak D, Benedetti E, Oberholzer J, Danielson KK. Disparities in completion rates of the medical prerenal transplant evaluation by race or ethnicity and gender. *Transplantation* [Internet]. 2015 Jan 15 [cited 2022 Feb 18];99(1):236–42. Available from: [https://journals.lww.com/transplantjournal/Fulltext/2015/01150/Disparities\\_in\\_Completion\\_Rates\\_of\\_the\\_Medical.39.aspx](https://journals.lww.com/transplantjournal/Fulltext/2015/01150/Disparities_in_Completion_Rates_of_the_Medical.39.aspx)
66. Murthy BVR, Molony DA, Stack AG. Survival Advantage of Hispanic Patients Initiating Dialysis in the United States Is Modified by Race. *J Am Soc Nephrol* [Internet]. 2005 Mar 1 [cited 2022 Jan 26];16(3):782–90. Available from: <https://jasn.asnjournals.org/content/16/3/782>
67. Mustian MN, Kumar V, Stegner K, Mompoin-Williams D, Hanaway M, Deierhoi MH, et al. Mitigating Racial and Gender Disparities in Access to Living Donor Kidney Transplantation: Impact of the Nation's Longest Single-Center Kidney Chain. *Ann Surg* [Internet]. 2019 Oct 1 [cited 2022 Jan 26];270(4):639. Available from: <https://pubmed.ncbi.nlm.nih.gov/31666625/>
68. Myaskovsky L, Almaro Doebler D, Posluszny DM, Dew MA, Unruh M, Fried LF, et al. Perceived discrimination predicts longer time to be accepted for kidney transplant. *Transplantation* [Internet]. 2012 Feb 27 [cited 2022 Feb 19];93(4):423–9. Available from: <https://pubmed.ncbi.nlm.nih.gov/22228417/>
69. Naghibi O, Naghibi M, Nazemian F. Saudi Journal of Kidney Diseases and Transplantation. *Saudi J Kidney Dis Transplant* [Internet]. 2008 [cited 2022 Jan 26];19(4):545. Available from: <https://www.sjkdt.org/article.asp?issn=1319-2442;year=2008;volume=19;issue=4;spage=545;epage=550;aulast=Naghibi>
70. Nee R, Martinez-Orsorio J, Yuan CM, Little DJ, Watson MA, Agodoa L, et al. Survival Disparity of African American Versus Non-African American Patients With ESRD Due to SLE. *Am J Kidney Dis* [Internet]. 2015 Oct 1 [cited 2022 Jan 26];66(4):630–7. Available from: <https://pubmed.ncbi.nlm.nih.gov/26002293/>
71. Ng DK, Moxey-Mims M, Warady BA, Furth SL, Muñoz A. Racial differences in renal replacement therapy initiation among children with a nonglomerular cause of chronic kidney disease. *Ann Epidemiol* [Internet]. 2016 Nov 1 [cited 2022 Feb 19];26(11):780–787.e1. Available from: <https://pubmed.ncbi.nlm.nih.gov/27789133/>
72. Nguyen S, Martz K, Stablein D, Neu A. Wait list status of pediatric dialysis patients in North America. *Pediatr Transplant* [Internet]. 2011 Jun [cited 2022 Jun 4];15(4):376–83. Available from: <https://pubmed.ncbi.nlm.nih.gov/21466638/>
73. Nguyen T, Sise ME, Delgado C, Williams W, Reese P, Goldberg D. Race, Education, and Gender Disparities in Transplantation of Kidneys from Hepatitis C Viremic Donors. *Transplantation* [Internet]. 2021 [cited 2022 Jan 27];1850–7. Available from: [https://journals.lww.com/transplantjournal/Fulltext/2021/08000/Race\\_Education\\_and\\_Gender\\_Disparities\\_in.30.aspx](https://journals.lww.com/transplantjournal/Fulltext/2021/08000/Race_Education_and_Gender_Disparities_in.30.aspx)
74. Nogueira PCK, de Carvalho MFC, de Santis Feltran L, Konstantyner T, Sesso R. Inequality in pediatric kidney transplantation in Brazil. *Pediatr Nephrol* [Internet]. 2016 Mar 1 [cited 2022 Jan 26];31(3):501–7. Available from: <https://link.springer.com/article/10.1007/s00467-015-3226-z>
75. Patzer RE, Amaral S, Klein M, Kutner N, Perryman JP, Gazmararian JA, et al. Racial disparities in pediatric access to kidney transplantation: does socioeconomic status play a role? *Am J Transplant* [Internet]. 2012 [cited 2022 Jun 4];12(2):369–78. Available from: <https://pubmed.ncbi.nlm.nih.gov/22226039/>
76. Patzer RE, Sayed BA, Kutner N, McClellan WM, Amaral S. Racial and ethnic differences in pediatric access to preemptive kidney transplantation in the United States. *Am J Transplant* [Internet]. 2013 Jul [cited 2022 Jun 4];13(7):1769–81. Available from: <https://pubmed.ncbi.nlm.nih.gov/23731389/>
77. Patzer RE, McPherson L, Wang Z, Plantinga LC, Paul S, Ellis M, et al. Dialysis facility referral and start of evaluation for kidney transplantation among patients treated with dialysis in the Southeastern United States. *Am J Transplant* [Internet]. 2020 Aug 1 [cited 2022 Feb 5];20(8):2113–25. Available from: <https://pubmed.ncbi.nlm.nih.gov/31981441/>

78. Patzer RE, Mohan S, Kutner N, McClellan WM, Amaral S. Racial and ethnic disparities in pediatric renal allograft survival in the United States. *Kidney Int* [Internet]. 2015 Mar 1 [cited 2022 Jun 4];87(3):584–92. Available from: <https://pubmed.ncbi.nlm.nih.gov/25337773/>
79. Patzer RE, Plantinga LC, Paul S, Gander J, Krisher J, Sauls L, et al. Variation in Dialysis Facility Referral for Kidney Transplantation Among Patients With End-Stage Renal Disease in Georgia. *JAMA* [Internet]. 2015 Aug 11 [cited 2022 Feb 18];314(6):582–94. Available from: <https://pubmed.ncbi.nlm.nih.gov/26262796/>
80. Pecoits-Filho R, Ribeiro SC, Kirk A, Da Silva HS, Pille A, Falavinha RS, et al. Racial and social disparities in the access to automated peritoneal dialysis - results of a national PD cohort. *Sci Reports* 2017 71 [Internet]. 2017 Jul 12 [cited 2022 Jan 26];7(1):1–7. Available from: <https://www.nature.com/articles/s41598-017-05544-1>
81. Peracha J, Hayer M, Sharif A. Gender Disparity in Living-Donor Kidney Transplant Among Minority Ethnic Groups. *Exp Clin Transpl*. 2016;14(2):139–45.
82. Peterson WJ, Barker J, Allon M. Disparities in Fistula Maturation Persist Despite Preoperative Vascular Mapping. *Clin J Am Soc Nephrol* [Internet]. 2008 Mar 1 [cited 2022 Jan 26];3(2):437–41. Available from: <https://cjasn.asnjournals.org/content/3/2/437>
83. Pisoni RL, Young EW, Dykstra DM, Greenwood RN, Hecking E, Gillespie B, et al. Vascular access use in Europe and the United States: Results from the DOPPS. *Kidney Int*. 2002 Jan 1;61(1):305–16.
84. Pletcher J, Koizumi N, Nayebpour M, Alam Z, Ortiz J. Improved outcomes after live donor renal transplantation for septuagenarians. *Clin Transplant* [Internet]. 2020 Mar 1 [cited 2022 Jan 26];34(3):e13808. Available from: <https://onlinelibrary.wiley.com/doi/full/10.1111/ctr.13808>
85. Ploos van Amstel S, Noordzij M, Borzych-Duzalka D, Chesnaye NC, Xu H, Rees L, et al. Mortality in Children Treated With Maintenance Peritoneal Dialysis: Findings From the International Pediatric Peritoneal Dialysis Network Registry. *Am J Kidney Dis*. 2021 Sep 1;78(3):380–90.
86. Plumb LA, Sinha MD, Casula A, Inward CD, Marks SD, Caskey FJ, et al. Associations between Deprivation, Geographic Location, and Access to Pediatric Kidney Care in the United Kingdom. *Clin J Am Soc Nephrol* [Internet]. 2021 [cited 2022 Jun 4];16(2):194–203. Available from: <https://pubmed.ncbi.nlm.nih.gov/33468533/>
87. Port FK, Wolfe RA, Levin NW, Guire KE, Ferguson CW. Income and survival in chronic dialysis patients. *ASAIO Trans* [Internet]. 1990 Jul [cited 2022 Jan 26];36(3). Available from: <https://pubmed.ncbi.nlm.nih.gov/2252648/>
88. Prakash S, Perzynski AT, Austin PC, Wu CF, Lawless ME, Paterson JM, et al. Neighborhood socioeconomic status and barriers to peritoneal dialysis: A mixed methods study. *Clin J Am Soc Nephrol* [Internet]. 2013 Oct 7 [cited 2022 Jan 26];8(10):1741–9. Available from: <https://pubmed.ncbi.nlm.nih.gov/24378935/>
89. Prasad S, Singh S, Duncan N, Cairns TDH, Griffith M, Hakim N, et al. Ethnicity and survival on dialysis in west London. *Kidney Int*. 2004 Dec 1;66(6):2416–21.
90. Rhee CM, Lertdumrongluk P, Streja E, Park J, Moradi H, Lau WL, et al. Impact of Age, Race and Ethnicity on Dialysis Patient Survival and Kidney Transplantation Disparities. *Am J Nephrol* [Internet]. 2014 [cited 2022 Jan 26];39(3):183–94. Available from: <https://www.karger.com/Article/FullText/358497>
91. Riad S, Jackson S, Chinnakotla S, Verghese P. Primary pediatric deceased-donor kidney transplant recipients outcomes by immunosuppression induction received in the United States. *Pediatr Transplant* [Internet]. 2021 Aug 1 [cited 2022 Jun 4];25(5). Available from: <https://pubmed.ncbi.nlm.nih.gov/33314638/>
92. Saunders MR, Lee H, Alexander GC, Tak HJ, Thistlethwaite JR, Ross LF. Racial disparities in reaching the renal transplant waitlist: is geography as important as race? *Clin Transplant* [Internet]. 2015 Jun 1 [cited 2022 Feb 18];29(6):531–8. Available from: <https://onlinelibrary.wiley.com/doi/full/10.1111/ctr.12547>
93. Schaefer F, Borzych-Duzalka D, Azocar M, Munarriz RL, Sever L, Aksu N, et al. Impact of global economic disparities on practices and outcomes of chronic peritoneal dialysis in children: Insights from the international pediatric peritoneal dialysis network registry. *Perit Dial Int* [Internet]. 2012 Jul 1 [cited 2022 Jan 26];32(4):399–409. Available from: <https://journals.sagepub.com/doi/10.3747/pdi.2012.00126>

94. Schold JD, Gregg JA, Harman JS, Hall AG, Patton PR, Meier-Kriesche HU. Barriers to evaluation and wait listing for kidney transplantation. *Clin J Am Soc Nephrol* [Internet]. 2011 Jul 1 [cited 2022 Feb 19];6(7):1760–7. Available from: <https://pubmed.ncbi.nlm.nih.gov/21597030/>
95. Schold JD, Srinivas TR, Braun WE, Shoskes DA, Nurko S, Poggio ED. The relative risk of overall graft loss and acute rejection among African American renal transplant recipients is attenuated with advancing age. *Clin Transplant* [Internet]. 2011 Sep [cited 2022 Feb 19];25(5):721–30. Available from: <https://pubmed.ncbi.nlm.nih.gov/20964717/>
96. Schouten RW, Haverkamp GL, Loosman WL, Chandie Shaw PK, van Ittersum FJ, Smets YFC, et al. Ethnic Differences in the Association of Depressive Symptoms with Clinical Outcome in Dialysis Patients. *J racial Ethn Heal disparities* [Internet]. 2019 Oct 1 [cited 2022 Jan 26];6(5):990–1000. Available from: <https://pubmed.ncbi.nlm.nih.gov/31215016/>
97. Segev DL, Kucirka LM, Oberai PC, Parekh RS, Boulware LE, Powe NR, et al. Age and Comorbidities Are Effect Modifiers of Gender Disparities in Renal Transplantation. *J Am Soc Nephrol* [Internet]. 2009 Mar [cited 2022 Feb 19];20(3):621. Available from: <https://pubmed.ncbi.nlm.nih.gov/182653677/>
98. Seipp R, Zhang N, Nair SS, Khamash H, Sharma A, Leischow S, et al. Patient and allograft outcomes after kidney transplant for the Indigenous patients in the United States. *PLoS One* [Internet]. 2021 Feb 1 [cited 2022 Feb 5];16(2):e0244492. Available from: <https://journals.plos.org/plosone/article?id=10.1371/journal.pone.0244492>
99. Shah S, Leonard AC, Meganathan K, Christianson AL, Thakar C V. Temporal Trends in Incident Mortality in Dialysis Patients: Focus on Sex and Racial Disparities. *Am J Nephrol* [Internet]. 2019 Mar 1 [cited 2022 Jan 26];49(3):241–53. Available from: <https://www.karger.com/Article/FullText/497446>
100. Shatat IF, Taber DJ, Shrivastava S, Weimert NA, Sas DJ, Chavin KD, et al. Graft outcomes in pediatric kidney transplantation: focus on the role of race. *Saudi J Kidney Dis Transpl* [Internet]. 2012 [cited 2022 Jun 4];23(4):684–92. Available from: <https://pubmed.ncbi.nlm.nih.gov/22805378/>
101. Siracuse JJ, Gill HL, Epelboym I, Wollstein A, Kotsurovskyy Y, Catz D, et al. Effect of Race and Insurance Status on Outcomes after Vascular Access Placement for Hemodialysis. *Ann Vasc Surg*. 2014 May 1;28(4):964–9.
102. Sule S, Fivush B, Neu A, Furth S. Increased risk of death in African American patients with end-stage renal disease secondary to lupus. *Clin Kidney J* [Internet]. 2014 Feb [cited 2022 Jan 26];7(1):40. Available from: <https://pubmed.ncbi.nlm.nih.gov/24389169/>
103. Taber DJ, Egede LE, Baliga PK. Outcome disparities between African Americans and Caucasians in contemporary kidney transplant recipients. *Am J Surg* [Internet]. 2017 Apr 1 [cited 2022 Feb 18];213(4):666–72. Available from: <http://www.americanjournalofsurgery.com/article/S000296101630900X/fulltext>
104. Taber DJ, Hamed M, Rodrigue JR, Gebregziabher MG, Srinivas TR, Baliga PK, et al. Quantifying the Race Stratified Impact of Socioeconomics on Graft Outcomes in Kidney Transplant Recipients. *Transplantation* [Internet]. 2016 Jun 21 [cited 2022 Feb 18];100(7):1550–7. Available from: <https://pubmed.ncbi.nlm.nih.gov/26425875/>
105. Tahir S, Gillott H, Jackson-Spence F, Nath J, Mytton J, Evison F, et al. Do outcomes after kidney transplantation differ for black patients in England versus New York State? A comparative, population-cohort analysis. *BMJ Open* [Internet]. 2017 May 1 [cited 2022 Feb 18];7(5). Available from: <https://pubmed.ncbi.nlm.nih.gov/28487457/>
106. Tang W, Grace B, McDonald SP, Hawley CM, Badve S V., Boudville NC, et al. Socio-Economic Status and Peritonitis in Australian Non-Indigenous Peritoneal Dialysis Patients. *Perit Dial Int* [Internet]. 2015 Jul 1 [cited 2022 Jan 26];35(4):450. Available from: <https://pubmed.ncbi.nlm.nih.gov/26520728/>
107. Tjaden LA, Noordzij M, Van Stralen KJ, Kuehni CE, Raes A, Cornelissen EAM, et al. Racial Disparities in Access to and Outcomes of Kidney Transplantation in Children, Adolescents, and Young Adults: Results From the ESPN/ERA-EDTA (European Society of Pediatric Nephrology/European Renal Association-European Dialysis and Transplant Association) Registry. *Am J Kidney Dis* [Internet]. 2016 Feb 1 [cited 2022 Jun 4];67(2):293–301. Available from: <https://pubmed.ncbi.nlm.nih.gov/26561356/>
108. Van Den Beukel TO, Dekker FW, Siegert CEH. Increased survival of immigrant compared to native dialysis patients in an urban setting in the Netherlands. *Nephrol Dial Transpl* [Internet]. 2008 Nov 1 [cited 2022 Jan 26];23(11):3571–7. Available from: <https://academic.oup.com/ndt/article/23/11/3571/1938681>

109. Vavallo A, Lucarelli G, Spilotros M, Bettocchi C, Palazzo S, Selvaggi FP, et al. Impact of donor-recipient gender on kidney graft and patient survival: Short- and long-term outcomes. *World J Urol* [Internet]. 2014 Aug 2 [cited 2022 Jan 26];32(3):709–14. Available from: <https://link.springer.com/article/10.1007/s00345-013-1137-9>
110. Vogelzang JL, Van Stralen KJ, Noordzij M, Diez JA, Carrero JJ, Couchoud C, et al. Mortality from infections and malignancies in patients treated with renal replacement therapy: data from the ERA-EDTA registry. *Nephrol Dial Transplant* [Internet]. 2015 Jun 1 [cited 2022 Jan 26];30(6):1028–37. Available from: <https://academic.oup.com/ndt/article/30/6/1028/2324882>
111. Walker DR, Inglese GW, Sloand JA, Just PM. Dialysis Facility and Patient Characteristics Associated with Utilization of Home Dialysis. *Clin J Am Soc Nephrol* [Internet]. 2010 Sep 1 [cited 2022 Jan 26];5(9):1649–54. Available from: <https://cjasn.asnjournals.org/content/5/9/1649>
112. Weigert A, Drozd M, Silva F, Frazão J, Alsuwaida A, Krishnan M, et al. Influence of gender and age on haemodialysis practices: a European multicentre analysis. *Clin Kidney J* [Internet]. 2020 Aug 13 [cited 2022 Jan 26];13(2):217. Available from: [/pmc/articles/PMC7147302/](https://pmc/articles/PMC7147302/)
113. Wilkins LJ, Nyame YA, Gan V, Lin S, Greene DJ, Flechner SM, et al. A Contemporary Analysis of Outcomes and Modifiable Risk Factors of Ethnic Disparities in Kidney Transplantation. *J Natl Med Assoc*. 2019 Apr 1;111(2):202–9.
114. Williams N, Korneffel K, Koizumi N, Ortiz J. African American polycystic kidney patients receive higher risk kidneys, but do not face increased risk for graft failure or post-transplant mortality. *Am J Surg* [Internet]. 2021 May 1 [cited 2022 Jan 27];221(5):1093–103. Available from: <http://www.americanjournalofsurgery.com/article/S0002961020305973/fulltext>
115. Wong YHS, Wong G, Johnson DW, McDonald S, Clayton P, Boudville N, et al. Socio-economic disparity, access to care and patient-relevant outcomes after kidney allograft failure. *Transpl Int* [Internet]. 2021 Nov 1 [cited 2022 Feb 5];34(11):2329–40. Available from: <https://pubmed.ncbi.nlm.nih.gov/34339557/>
116. Woo K, Gascue L, Goldman DP, Romley JA. Variations in outcomes of hemodialysis vascular access by race/ethnicity in the elderly. *J Vasc Surg* [Internet]. 2017 Mar 1 [cited 2022 Jan 26];65(3):783-792.e4. Available from: <https://pubmed.ncbi.nlm.nih.gov/28027805/>
117. Wu DA, Robb ML, Watson CJE, Forsythe JLR, Tomson CRV, Cairns J, et al. Barriers to living donor kidney transplantation in the United Kingdom: a national observational study. *Nephrol Dial Transplant* [Internet]. 2017 May 1 [cited 2022 Feb 18];32(5):890–900. Available from: <https://pubmed.ncbi.nlm.nih.gov/28379431/>
118. Yan G, Shen JJ, Harford R, Yu W, Nee R, Clark MJ, et al. Racial and Ethnic Variations in Mortality Rates for Patients Undergoing Maintenance Dialysis Treated in US Territories Compared with the US 50 States. *Clin J Am Soc Nephrol* [Internet]. 2020 Jan 1 [cited 2022 Jan 26];15(1):101–8. Available from: <https://pubmed.ncbi.nlm.nih.gov/31857376/>
119. Zarkowsky DS, Arhuidese IJ, Hicks CW, Canner JK, Qazi U, Obeid T, et al. Racial/Ethnic Disparities Associated With Initial Hemodialysis Access. *JAMA Surg* [Internet]. 2015 Jun 1 [cited 2022 Jan 26];150(6):529–36. Available from: <https://jamanetwork.com/journals/jamasurgery/fullarticle/2280714>

## Supplementary S3: Study characteristics

**Suppl. Table S2.** Methodological characteristics of the included studies

| Study                    | Country       | Design               | Data source                   | Sample size | Time period | Population                                        | Male sex (%) | Peritoneal dialysis (%) | Diabetes mellitus (%) |
|--------------------------|---------------|----------------------|-------------------------------|-------------|-------------|---------------------------------------------------|--------------|-------------------------|-----------------------|
| <b>2021; Qian</b>        | USA           | Retrospective cohort | USRDS                         | 14,077      | 2010-2012   | Hemodialysis, start with CVC, age $\geq 67$ years | 53           | 0                       | 65                    |
| <b>2021; MacRae</b>      | Canada        | Prospective cohort   | 5 Canadian dialysis programs  | 2,375       | 2004-2012   | Hemodialysis                                      | 60.9         | 0                       | 56.1                  |
| <b>2021; Pisoni</b>      | International | Prospective cohort   | DOPPS study                   | 2,040       | 2009-2015   | Hemodialysis                                      | 60.8         | 0                       | 60                    |
| <b>2021; Schellartz</b>  | Germany       | Retrospective cohort | Health insurance data         | 4,727       | 2012-2016   | Hemodialysis/ Peritoneal dialysis                 | 58           | 3.7                     | N/A                   |
| <b>2021; Barth</b>       | Hungary       | Retrospective cohort | Study data                    | 254         | 2020        | ESKD, age $\leq 75$ years                         | 65           | 11                      | 20                    |
| <b>2021; Wesselman</b>   | USA           | Prospective cohort   | Study data                    | 1,056       | 2010-2012   | ESKD                                              | 62           | 10                      | N/A                   |
| <b>2021; Cirillo</b>     | Italy         | Retrospective cohort | Campania province data        | 11,716      | 2014-2018   | ESKD                                              | 61.5         | 1.4                     | N/A                   |
| <b>2021; Ahearn</b>      | USA           | Retrospective cohort | USRDS                         | 1,478,037   | 2005-2017   | ESKD                                              | 57           | N/A                     | 33.4                  |
| <b>2021; Rita</b>        | Switzerland   | Prospective cohort   | Swiss Transplant Cohort Study | 1,985       | 2008-2017   | Living/deceased-donor transplantation             | 64           | -                       | N/A                   |
| <b>2021; Wiley</b>       | USA           | Retrospective cohort | Study data                    | 623         | 2000-2018   | Living/deceased-donor transplantation             | 60           | -                       | 33                    |
| <b>2021; Belyaev</b>     | New Zealand   | Retrospective cohort | ANZDATA                       | 837         | 2008-2018   | Living/deceased-donor transplantation             | 63.3         | -                       | 35.2                  |
| <b>2021; Park</b>        | South Korea   | Retrospective cohort | Health insurance data         | 12,564      | 2007-2015   | ESKD, age $\leq 70$ years                         | 59.1         | 15.6                    | 33.9                  |
| <b>2020; Arya</b>        | USA           | Retrospective cohort | USRDS                         | 74,194      | 2010-2013   | Hemodialysis, start with CVC, age $\geq 66$ years | 53           | 0                       | 49                    |
| <b>2020; Arhuidese</b>   | USA           | Retrospective cohort | USRDS                         | 359,942     | 2007-2014   | Hemodialysis                                      | 57.2         | 0                       | 54                    |
| <b>2020; Copeland</b>    | USA           | Retrospective cohort | Optum Clinformatics Data Mart | 7,584       | 2012-2016   | Hemodialysis, start with CVC                      | 57           | 0                       | 83                    |
| <b>2020; Krishnasamy</b> | Australia     | Retrospective cohort | ANZDATA                       | 11,844      | 2002-2012   | Hemodialysis                                      | 62.2         | 0                       | 31.2                  |

|                          |                |                      |                                              |           |           |                                                                                |      |      |      |
|--------------------------|----------------|----------------------|----------------------------------------------|-----------|-----------|--------------------------------------------------------------------------------|------|------|------|
| <b>2020; Yolgosteren</b> | Turkey         | Retrospective cohort | Study data                                   | 349       | 2008      | Hemodialysis, start with AVF                                                   | 57.5 | 0    | 34.8 |
| <b>2020; Ku</b>          | USA            | Prospective cohort   | CRIC study                                   | 678       | 2003-2013 | Hemodialysis/<br>Peritoneal dialysis                                           | 60.6 | 13.9 | 70.4 |
| <b>2020; Hayat</b>       | New Zealand    | Prospective cohort   | New Zealand Peritoneal Dialysis Registry     | 6,379     | 1995-2014 | Peritoneal dialysis                                                            | 54.7 | 100  | 47.5 |
| <b>2020; Vogel</b>       | USA            | Retrospective cohort | USRDS                                        | 1,324,037 | 2000-2014 | Hemodialysis/<br>Peritoneal dialysis                                           | 56.1 | 7.7  | 47.8 |
| <b>2020; Shen</b>        | USA            | Retrospective cohort | USRDS                                        | 523,526   | 2005-2013 | Hemodialysis/<br>Peritoneal dialysis/<br>Home dialysis                         | 57.6 | 8    | 45.6 |
| <b>2020; Melk</b>        | Germany        | Retrospective cohort | Health insurance data                        | 8,921     | 2005-2013 | ESKD                                                                           | 55.9 | N/A  | 50.9 |
| <b>2020; Park</b>        | South Korea    | Retrospective cohort | Health insurance data                        | 12,889    | 2007-2015 | ESKD, age ≤70 years                                                            | 59.1 | 10.4 | 55.9 |
| <b>2020; Pruthi</b>      | United Kingdom | Prospective cohort   | ATTOM study                                  | 2,676     | 2011-2013 | ESKD, age ≤75 years                                                            | 64   | N/A  | 40   |
| <b>2020; Murphy</b>      | USA            | Prospective cohort   | Scientific Registry of Transplant Recipients | 3,013     | 2009-2018 | ESKD                                                                           | 61   | 11   | 40   |
| <b>2020; Ng</b>          | USA            | Prospective cohort   | Study data                                   | 1,055     | 2010-2018 | ESKD                                                                           | 61.4 | N/A  | N/A  |
| <b>2019; Nee</b>         | USA            | Retrospective cohort | USRDS                                        | 56,194    | 2007-2014 | Hemodialysis/<br>Peritoneal dialysis                                           | 49.5 | 0.5  | 63.3 |
| <b>2019; Howson</b>      | Australia      | Retrospective cohort | ANZDATA                                      | 616       | 2000-2010 | Living/deceased-donor transplantation                                          | 62.8 | -    | 15.1 |
| <b>2019; King</b>        | USA            | Prospective cohort   | Scientific Registry of Transplant Recipients | 157,073   | 2000-2018 | Living/deceased-donor transplantation                                          | 60.6 | -    | 28.1 |
| <b>2019; Myaskovsky</b>  | USA            | Prospective cohort   | Veterans Affairs Kidney Transplant           | 611       | 2010-2012 | ESKD                                                                           | 96.9 | 10.3 | N/A  |
| <b>2019; Ke</b>          | Canada         | Retrospective cohort | Health insurance data                        | 396,593   | 1997-2011 | ESKD                                                                           | 47.9 | N/A  | 100  |
| <b>2019; Naylor</b>      | Canada         | Retrospective cohort | CORR                                         | 4,414     | 2004-2014 | Living/deceased-donor transplantation                                          | 63.5 | 28   | 32.8 |
| <b>2018; Shah</b>        | USA            | Retrospective cohort | USRDS                                        | 885,699   | 2004-2014 | Hemodialysis                                                                   | 56.3 | 0    | 57   |
| <b>2018; Huria</b>       | New Zealand    | Retrospective cohort | ANZDATA                                      | 4,781     | 2002-2011 | Hemodialysis/<br>Peritoneal dialysis/<br>Living/deceased-donor transplantation | 59.7 | 32   | 45   |

|                                |                |                      |                                              |           |           |                                                   |      |      |      |
|--------------------------------|----------------|----------------------|----------------------------------------------|-----------|-----------|---------------------------------------------------|------|------|------|
| <b>2018; Lin</b>               | USA            | Retrospective cohort | USRDS                                        | 5,295     | 2010-2013 | Hemodialysis                                      | 53.6 | 0    | 60.2 |
| <b>2018; Krishnasamy</b>       | Australia      | Retrospective cohort | ANZDATA                                      | 20,810    | 2004-2013 | Hemodialysis/<br>Peritoneal dialysis              | 62.5 | 31.5 | 42.1 |
| <b>2018; Keddis</b>            | USA            | Retrospective cohort | Study data                                   | 600       | 2012-2016 | ESKD                                              | 59.2 | 16.9 | 60.2 |
| <b>2018; Williams</b>          | United Kingdom | Retrospective cohort | Study data                                   | 1,066     | 2007-2017 | Living/deceased-donor transplantation             | 59.8 | -    | N/A  |
| <b>2018; Sypek</b>             | Australia      | Retrospective cohort | ANZDATA                                      | 21,213    | 2006-2015 | ESKD                                              | 61.8 | N/A  | 35.1 |
| <b>2018; Liu</b>               | USA            | Retrospective cohort | Study data                                   | 483       | 2006-2012 | Living/deceased-donor transplantation             | 61.2 | -    | 31.4 |
| <b>2018; Chatelet</b>          | France         | Retrospective cohort | Cristal database                             | 8,701     | 2010-2014 | Living/deceased-donor transplantation             | 63.8 | 10.6 | 16.8 |
| <b>2018<sup>a</sup>; Zhang</b> | USA            | Retrospective cohort | USRDS                                        | 1,253,100 | 2005-2015 | ESKD                                              | 56.9 | N/A  | 52.5 |
| <b>2018<sup>b</sup>; Zhang</b> | Sweden         | Retrospective cohort | Swedish Renal Register                       | 13,982    | 1995-2013 | ESKD                                              | 65.6 | N/A  | 33.2 |
| <b>2018; Peng</b>              | USA            | Retrospective cohort | USRDS                                        | 3,775     | 2005-2009 | ESKD                                              | 55.7 | N/A  | 47.9 |
| <b>2018; Purnell</b>           | USA            | Retrospective cohort | Scientific Registry of Transplant Recipients | 453,162   | 1995-2014 | ESKD                                              | 61   | N/A  | N/A  |
| <b>2017; Trivedi</b>           | USA            | Retrospective cohort | Medicare Limited Data Set                    | 2,693     | 2009      | Hemodialysis, start with AVF/AVG                  | 56   | 0    | N/A  |
| <b>2017; McGill</b>            | USA            | Retrospective cohort | USRDS                                        | 18,883    | 2010-2011 | Hemodialysis, start with CVC, age $\geq 67$ years | 51.8 | 0    | 45.6 |
| <b>2017; McKercher</b>         | Australia      | Retrospective cohort | ANZDATA                                      | 21,832    | 2001-2013 | Hemodialysis                                      | 59.9 | 0    | 37.7 |
| <b>2017; Pisoni</b>            | International  | Prospective cohort   | DOPPS study                                  | 4,692     | 1996-2015 | Hemodialysis                                      | 61   | 0    | 52.4 |
| <b>2017; Wilmink</b>           | United Kingdom | Retrospective cohort | PROTON                                       | 500       | 2003-2011 | Hemodialysis                                      | N/A  | 0    | N/A  |
| <b>2017; Gulcan</b>            | Turkey         | Retrospective cohort | Study data                                   | 322       | 2000-2012 | Peritoneal dialysis                               | 48.4 | 100  | N/A  |
| <b>2017; Kim</b>               | South Korea    | Retrospective cohort | Seoul National University Hospital registry  | 655       | 2000-2012 | Peritoneal dialysis                               | 60.9 | 100  | 35.6 |
| <b>2017; Chan</b>              | Australia      | Retrospective cohort | ANZDATA                                      | 9,766     | 1994-2013 | Peritoneal dialysis                               | 57   | 100  | 29   |
| <b>2017; Wallace</b>           | USA            | Retrospective cohort | Centers for Medicare/ Medicaid Services      | 369,164   | 2012      | Hemodialysis/<br>Peritoneal dialysis              | N/A  | N/A  | N/A  |



|                                |              |                      |                                              |         |           |                                                          |      |      |      |
|--------------------------------|--------------|----------------------|----------------------------------------------|---------|-----------|----------------------------------------------------------|------|------|------|
| <b>2017; Trinh</b>             | Canada       | Retrospective cohort | CORR                                         | 61,237  | 1996-2012 | Hemodialysis/<br>Peritoneal dialysis                     | 59   | 15   | 24   |
| <b>2017; Imanishi</b>          | Japan        | Prospective cohort   | DOPPS                                        | 7,974   | 1999-2011 | Hemodialysis                                             | 62   | 100  | 31   |
| <b>2017; Gill</b>              | USA          | Retrospective cohort | Scientific Registry of Transplant Recipients | 77,607  | 2006-2016 | Living/deceased-donor transplantation                    | 61.9 | -    | 23.3 |
| <b>2017; Zhang</b>             | Sweden       | Retrospective cohort | Swedish Renal Register                       | 16,215  | 1995-2013 | Hemodialysis/<br>Peritoneal dialysis                     | 65.4 | N/A  | 31.3 |
| <b>2017; Choi</b>              | South Korea  | Retrospective cohort | Korean National Health Insurance Cohort Data | 1,792   | 2002-2013 | Hemodialysis/<br>Peritoneal dialysis                     | 56.8 | 87.4 | 53.5 |
| <b>2017; Taber</b>             | USA          | Retrospective cohort | USRDS, Veteran Affairs                       | 4,918   | 2001-2007 | Living/deceased-donor transplantation                    | 97.6 | -    | 38.1 |
| <b>2016; Tamayo Isla</b>       | South Africa | Retrospective cohort | PKDC                                         | 340     | 2007-2014 | Hemodialysis/<br>Peritoneal dialysis                     | 52.1 | 42.9 | 10.3 |
| <b>2016; Liu</b>               | China        | Retrospective cohort | Study data                                   | 1,778   | 2006-2013 | Peritoneal dialysis                                      | 59.5 | 100  | 25.3 |
| <b>2016; Shabankhani</b>       | Iran         | Retrospective cohort | Study data                                   | 500     | 2007-2013 | Hemodialysis                                             | 53.6 | 100  | 46.2 |
| <b>2016; Mucsi</b>             | Canada       | Retrospective cohort | Study data                                   | 1,769   | 2003-2012 | ESKD                                                     | 60   | N/A  | 38   |
| <b>2016; Kihal-Talantikite</b> | France       | Retrospective cohort | REIN registry                                | 2,006   | 2004-2009 | Hemodialysis/<br>Peritoneal dialysis                     | 60.6 | 12.5 | 26   |
| <b>2016; Molmenti</b>          | USA          | Retrospective cohort | United Network for Organ Sharing             | 88,284  | 1999-2006 | Living/deceased-donor transplantation                    | 60.2 | -    | 28.6 |
| <b>2015; Nee</b>               | USA          | Retrospective cohort | USRDS                                        | 669,206 | 2007-2012 | Hemodialysis                                             | 46.7 | 0    | 50.4 |
| <b>2015; Lawton</b>            | Australia    | Retrospective cohort | ANZDATA                                      | 15,984  | 1995-2004 | Hemodialysis/<br>Peritoneal dialysis                     | 58.3 | 25.2 | 27.7 |
| <b>2015; van den Beukel</b>    | Denmark      | Retrospective cohort | Danish Nephrology Registry                   | 9,170   | 1995-2010 | Hemodialysis/<br>Peritoneal dialysis                     | 63.6 | 30.8 | 23.4 |
| <b>2015; Park</b>              | South Korea  | Prospective cohort   | 26 centers                                   | 946     | 2009-2013 | Hemodialysis                                             | 61.4 | 0    | 58.1 |
| <b>2015; Wang</b>              | China        | Prospective cohort   | Study data                                   | 564     | 2008-2011 | Continuous ambulatory peritoneal dialysis, age <80 years | 52.8 | 100  | 13.5 |
| <b>2015; Ward</b>              | Ireland      | Prospective cohort   | Study data                                   | 1,794   | 1990-2009 | Hemodialysis                                             | 61.2 | 100  | 11.9 |
| <b>2015; Ilori</b>             | USA          | Retrospective cohort | United Network for Organ Sharing             | 44,013  | 1996-2010 | Living/deceased-donor transplantation, age ≥60 years     | 62.5 | -    | 33.7 |

|                                  |                |                      |                                         |           |           |                                       |      |      |      |
|----------------------------------|----------------|----------------------|-----------------------------------------|-----------|-----------|---------------------------------------|------|------|------|
| <b>2015; Matsuoka</b>            | USA            | Retrospective cohort | Study data                              | 720       | 2004-2013 | Living/deceased-donor transplantation | 63.3 | -    | 27.2 |
| <b>2015; Ward</b>                | Ireland        | Retrospective cohort | Irish national transplantation center   | 1,944     | 1990-2009 | Living/deceased-donor transplantation | 62.6 | -    | N/A  |
| <b>2015; Arce</b>                | USA            | Retrospective cohort | USRDS                                   | 105,520   | 1996-2010 | ESKD                                  | 62.2 | 17.4 | 36   |
| <b>2014; Goldfarb-Rumyantzev</b> | USA            | Retrospective cohort | USRDS                                   | 109,390   | 2005-2008 | Hemodialysis                          | 53.1 | 0    | 40.2 |
| <b>2014; Cole</b>                | United Kingdom | Retrospective cohort | Renalware                               | 1,340     | 1996-2008 | Hemodialysis/<br>Peritoneal dialysis  | 61   | 1.6  | 28.4 |
| <b>2014; Burrows</b>             | USA            | Retrospective cohort | USRDS                                   | 510,666   | 1995-2009 | Hemodialysis                          | 51.2 | 0    | 100  |
| <b>2014; Prasad</b>              | India          | Prospective cohort   | Study data                              | 328       | 2005-2009 | Peritoneal dialysis, age <75 years    | 73.8 | 100  | 53.7 |
| <b>2014; Grace</b>               | Australia      | Retrospective cohort | ANZDATA                                 | 23,281    | 2000-2011 | Hemodialysis/<br>Peritoneal dialysis  | 61.7 | 47.7 | 38.4 |
| <b>2014; Kim</b>                 | South Korea    | Prospective cohort   | Study data                              | 495       | 2009      | Peritoneal dialysis                   | 61.4 | 100  | 55.2 |
| <b>2014; Yang</b>                | China          | Retrospective cohort | SSOP study                              | 2,264     | 2011      | Peritoneal dialysis                   | 49.9 | 100  | 38.8 |
| <b>2014; de Moraes</b>           | Brazil         | Prospective cohort   | Study data                              | 3,311     | 2004-2011 | Peritoneal dialysis                   | 47   | 100  | 41   |
| <b>2014; Teixeira</b>            | Brazil         | Retrospective cohort | Study data                              | 162       | 2007-2011 | Hemodialysis                          | 55.6 | 100  | 33.3 |
| <b>2013; Yan</b>                 | USA            | Retrospective cohort | USRDS                                   | 1,282,201 | 1995-2009 | Hemodialysis/<br>Peritoneal dialysis  | 54.6 | N/A  | 49.7 |
| <b>2013; Chang</b>               | South Korea    | Prospective cohort   | Study data                              | 441       | 2000-2005 | Peritoneal dialysis                   | 54.4 | 100  | 51.5 |
| <b>2013; Ros</b>                 | Sweden         | Retrospective cohort | Andalusian SICATA Registry              | 1,458     | 1999-2010 | Peritoneal dialysis                   | 57.1 | 100  | 19.4 |
| <b>2013; Fernades</b>            | Brazil         | Prospective cohort   | BRAZPD                                  | 2,159     | 2004-2007 | Peritoneal dialysis                   | 36.3 | 100  | 34.1 |
| <b>2013; Kimmel</b>              | USA            | Retrospective cohort | USRDS                                   | 589,036   | 2000-2008 | Hemodialysis                          | 54.9 | 0    | 55.2 |
| <b>2013; Arce</b>                | USA            | Retrospective cohort | USRDS                                   | 417,801   | 1995-2007 | ESKD age ≤75 years                    | 56.9 | 10.4 | 55.9 |
| <b>2013; Purnell</b>             | USA            | Retrospective cohort | USRDS, United Network for Organ Sharing | 208,736   | 2005-2008 | ESKD, age ≤70 years                   | 57   | N/A  | 55.8 |
| <b>2013; Waterman</b>            | USA            | Prospective cohort   | Study data                              | 695       | 2004-2007 | ESKD                                  | 58.7 | N/A  | 30.6 |

|                                  |                       |                      |                                                             |         |           |                                                  |      |      |      |
|----------------------------------|-----------------------|----------------------|-------------------------------------------------------------|---------|-----------|--------------------------------------------------|------|------|------|
| <b>2013; Promislow</b>           | Canada                | Retrospective cohort | CORR                                                        | 30,688  | 2000-2009 | ESKD                                             | 59.4 | 21.5 | 36.8 |
| <b>2012; Sood</b>                | Canada                | Retrospective cohort | CORR                                                        | 31,576  | 2000-2009 | Hemodialysis/<br>Peritoneal dialysis             | 60.7 | 23.9 | 45.7 |
| <b>2012; Woo</b>                 | USA                   | Retrospective cohort | Southern California Permanente Medical Group Renal Database | 5,821   | 2000-2008 | Hemodialysis                                     | 59   | 0    | 61   |
| <b>2012; van den Beukel</b>      | Netherlands           | Prospective cohort   | NECOSAD-II                                                  | 1,944   | 1997-2007 | Hemodialysis/<br>Peritoneal dialysis             | 62.5 | 40   | 14.2 |
| <b>2012; Marinovich</b>          | Argentina             | Retrospective cohort | National Registry of Chronic Dialysis                       | 13,466  | 2004-2008 | Hemodialysis                                     | 57.2 | 0    | 35.9 |
| <b>2012; Xu</b>                  | China                 | Retrospective cohort | Study data                                                  | 2,171   | 2011      | Peritoneal dialysis                              | 49.5 | 100  | 37.6 |
| <b>2012; Huang</b>               | Taiwan                | Prospective cohort   | Study data                                                  | 935     | 2008      | Hemodialysis                                     | 50.6 | 100  | 15.1 |
| <b>2012; Lockridge</b>           | Sweden                | Prospective cohort   | Study data                                                  | 191     | 1996-2009 | Home dialysis                                    | 62.3 | 100  | 22.5 |
| <b>2012; Neri</b>                | Italy                 | Retrospective cohort | MigliorDialisi dataset                                      | 1,238   | 2008-2011 | ESKD                                             | 63.6 | 0    | N/A  |
| <b>2012; Couchoud</b>            | France                | Retrospective cohort | REIN registry                                               | 14,883  | 2002-2009 | ESKD, age <75 years                              | 63.8 | N/A  | 37.4 |
| <b>2012; Goldfarb-Rumyantzev</b> | USA                   | Retrospective cohort | USRDS, United Network for Organ Sharing                     | 79,223  | 1990-2007 | Living/deceased-donor transplantation            | 61.4 | -    | 31   |
| <b>2012; Udayaraj</b>            | United Kingdom        | Retrospective cohort | UK Renal Registry                                           | 12,282  | 1997-2004 | Hemodialysis/ Peritoneal dialysis, age <70 years | 60.6 | N/A  | N/A  |
| <b>2012; Patzer</b>              | USA                   | Retrospective cohort | USRDS, United Network for Organ Sharing                     | 2,291   | 2005-2007 | ESKD                                             | 57.3 | N/A  | 38.4 |
| <b>2012; Garg</b>                | USA                   | Retrospective cohort | Organ Transplant Tracking Record                            | 533     | 2001-2009 | Living/deceased-donor transplantation            | 58.9 | -    | 52.2 |
| <b>2011; Lopez-Vargas</b>        | Australia/New Zealand | Prospective cohort   | 9 centers                                                   | 3,099   | 2008      | Hemodialysis                                     | 64   | 0    | 45   |
| <b>2011; Carrero</b>             | 9 European countries  | Retrospective cohort | ERA-EDTA                                                    | 108,963 | 1994-2004 | Hemodialysis/<br>Peritoneal dialysis             | 60.9 | 17.7 | 20.9 |
| <b>2011; Chidambaram</b>         | Canada                | Retrospective cohort | Ontario Health Insurance Plan                               | 5,162   | 1995-2005 | Peritoneal dialysis                              | 56.2 | 100  | 52.5 |
| <b>2011; Bastos</b>              | Brazil                | Prospective cohort   | BRAZPD                                                      | 1,952   | 2004-2007 | Peritoneal dialysis                              | 46   | 100  | 41   |
| <b>2011; Machado</b>             | Brazil                | Prospective cohort   | National Database for Renal Replacement Therapy             | 14,111  | 2000-2004 | Hemodialysis/ Peritoneal dialysis                | 57.1 | 11.1 | 17.5 |
| <b>2011; Hall</b>                | USA                   | Retrospective cohort | USRDS                                                       | 503,090 | 1995-2006 | Hemodialysis/ Peritoneal dialysis, age <65 years | 53.4 | N/A  | 51.9 |

|                         |                                             |                      |                                               |         |           |                                                  |      |      |      |
|-------------------------|---------------------------------------------|----------------------|-----------------------------------------------|---------|-----------|--------------------------------------------------|------|------|------|
| <b>2010; Chung</b>      | South Korea                                 | Retrospective cohort | Study data                                    | 213     | 1994-2005 | Peritoneal dialysis                              | 55.9 | 100  | 55.4 |
| <b>2010; Huang</b>      | Taiwan                                      | Retrospective cohort | Study data                                    | 200     | 2001-2007 | Hemodialysis/ Peritoneal dialysis                | 53   | 51   | N/A  |
| <b>2010; Sood</b>       | Canada                                      | Prospective cohort   | Manitoba Renal Program                        | 727     | 1997-2007 | Peritoneal dialysis                              | 55.3 | 100  | 44.6 |
| <b>2010; Sandhu</b>     | USA                                         | Retrospective cohort | USRDS                                         | 3,396   | 1990-1999 | ESKD                                             | 54.2 | N/A  | 50.4 |
| <b>2010; Udayaraj</b>   | United Kingdom                              | Retrospective cohort | UK Renal Registry                             | 11,299  | 1997-2004 | Hemodialysis/ Peritoneal dialysis, age <70 years | 61.3 | N/A  | N/A  |
| <b>2010; Ng</b>         | United Kingdom                              | Prospective cohort   | Study data                                    | 555     | 1995-2006 | Living/deceased-donor transplantation            | 53.4 | -    | N/A  |
| <b>2010; Ravanan</b>    | United Kingdom                              | Prospective cohort   | UK Renal Registry                             | 7,863   | 2003-2005 | Hemodialysis/ Peritoneal dialysis                | 60.4 | N/A  | 22.3 |
| <b>2009; Roderick</b>   | United Kingdom                              | Prospective cohort   | UK Renal Registry                             | 30,561  | 1997-2006 | Hemodialysis/ Peritoneal dialysis                | 62   | 25.8 | 18.3 |
| <b>2009; de Mutsert</b> | Netherlands                                 | Prospective cohort   | NECOSAD-II                                    | 700     | 1997-2007 | Hemodialysis/ Peritoneal dialysis                | 60.5 | 35.1 | 15   |
| <b>2009; Eisenstein</b> | USA                                         | Retrospective cohort | USRDS                                         | 186,424 | 1996-1999 | Hemodialysis                                     | 52.4 | 100  | 42.2 |
| <b>2009; Yeates</b>     | USA/ United Kingdom/ Australia/ New Zealand | Retrospective cohort | USRDS, CORR, ANZDATA                          | 312,507 | 1995-2005 | Hemodialysis/ Peritoneal dialysis                | 57.6 | N/A  | N/A  |
| <b>2009; Feyssa</b>     | USA                                         | Retrospective cohort | Study data                                    | 2,130   | 1995-2003 | Living/deceased-donor transplantation            | 60.8 | -    | 38.8 |
| <b>2009; Patzer</b>     | USA                                         | Retrospective cohort | United Network for Organ Sharing              | 35,346  | 1998-2002 | Hemodialysis                                     | 50.1 | 0    | 44.5 |
| <b>2008; Wolf</b>       | USA                                         | Prospective cohort   | ArMORR study                                  | 9,303   | 2004-2005 | Hemodialysis                                     | 54.7 | 0    | 42.7 |
| <b>2008; Sanabria</b>   | Colombia                                    | Retrospective cohort | Dialysis outcomes in Colombia study           | 923     | 2001-2003 | Hemodialysis/ Peritoneal dialysis                | 56.9 | 47.3 | 40.8 |
| <b>2008; Hall</b>       | USA                                         | Retrospective cohort | USRDS                                         | 22,152  | 1995-2003 | Hemodialysis/ Peritoneal dialysis                | 54.6 | 9.4  | 41.6 |
| <b>2008; Schaeffner</b> | USA                                         | Prospective cohort   | Dialysis Morbidity and Mortality Study Wave 2 | 3,245   | 1996-1997 | Hemodialysis/ Peritoneal dialysis                | 53.3 | N/A  | 49.7 |
| <b>2007; Gill</b>       | USA                                         | Retrospective cohort | USRDS                                         | 509,391 | 1995-2004 | ESKD, age ≤70 years                              | 54.7 | N/A  | 48.1 |
| <b>2006; Robinson</b>   | USA                                         | Prospective cohort   | DOPPS study                                   | 6,677   | 1996-2001 | Hemodialysis                                     | 54.6 | 0    | 40.4 |

|                         |                     |                      |                                                   |        |           |                                                  |      |      |      |
|-------------------------|---------------------|----------------------|---------------------------------------------------|--------|-----------|--------------------------------------------------|------|------|------|
| <b>2006; Caskey</b>     | United Kingdom      | Retrospective cohort | UK Renal Registry                                 | 10,392 | 1997-2004 | Hemodialysis/<br>Peritoneal dialysis             | 62.1 | 34.8 | 17.3 |
| <b>2006; Hemmelgarn</b> | Canada              | Retrospective cohort | CORR                                              | 10,338 | 1990-2000 | Hemodialysis/ Peritoneal dialysis                | 60.4 | 29.3 | 6.9  |
| <b>2006; Bayat</b>      | France              | Retrospective cohort | CRISTAL Registry                                  | 1,495  | 1997-2003 | ESKD                                             | 58.6 | 15.8 | 34.1 |
| <b>2005; Chung</b>      | South Korea, Sweden | Retrospective cohort | Study data                                        | 238    | 1994-2000 | Peritoneal dialysis                              | 57   | 100  | 49   |
| <b>2005; Mircescu</b>   | Romania             | Retrospective cohort | Study data                                        | 412    | 1989-2003 | Peritoneal dialysis                              | 50.2 | 100  | 22.6 |
| <b>2005; Kutner</b>     | USA                 | Retrospective cohort | DMMS Wave 2                                       | 868    | 1993-1994 | Hemodialysis/ Peritoneal dialysis                | 52.8 | 47.6 | 44.3 |
| <b>2005; Press</b>      | USA                 | Retrospective cohort | United Network for Organ Sharing                  | 4,471  | 1990      | Living/deceased-donor transplantation            | 58.9 | -    | 21.2 |
| <b>2005; Pallet</b>     | France              | Retrospective cohort | Donnees Informatisees VALidees En Transplantation | 1,092  | 1987-2003 | Living/deceased-donor transplantation            | 59.2 | -    | N/A  |
| <b>2005; Chakkerla</b>  | USA                 | Retrospective cohort | Veterans Affairs Kidney Transplant, USRDS         | 79,361 | 1991-2001 | Living/deceased-donor transplantation            | 60.3 | -    | 33.8 |
| <b>2004; Prasad</b>     | United Kingdom      | Prospective cohort   | Study data                                        | 474    | 1996-2001 | Hemodialysis/<br>Peritoneal dialysis             | 61.9 | 9.1  | 32.7 |
| <b>2004; Jager</b>      | Netherlands         | Prospective cohort   | NECOSAD study                                     | 1,347  | 1997-2001 | Hemodialysis/ Peritoneal dialysis                | 61   | 34.6 | 15   |
| <b>2004; Yeates</b>     | Canada              | Retrospective cohort | CORR                                              | 25,632 | 1990-1998 | Hemodialysis/ Peritoneal dialysis                | 59.6 | N/A  | 29.1 |
| <b>2004; Sequist</b>    | USA                 | Retrospective cohort | Intermountain ESRD Network #15                    | 1,335  | 1994-1995 | Hemodialysis/ Peritoneal dialysis                | 52.1 | 21   | 54.5 |
| <b>2004; Villar</b>     | France              | Retrospective cohort | Study data                                        | 549    | 1995-1998 | ESKD                                             | 63.2 | 20.2 | 31.9 |
| <b>2003; Wang</b>       | Canada              | Retrospective cohort | Study data                                        | 116    | 1996-1999 | Peritoneal dialysis                              | 64.7 | 100  | 36.2 |
| <b>2003; Cass</b>       | Australia           | Retrospective cohort | ANZDATA                                           | 5,322  | 1993-1998 | Hemodialysis/ Peritoneal dialysis, age <65 years | 56.7 | N/A  | 22.1 |
| <b>2003; Oniscu</b>     | Scotland            | Prospective cohort   | Scottish Renal Registry                           | 4,523  | 1989-1999 | Hemodialysis/ Peritoneal dialysis                | 58.3 | 29.6 | 16.3 |
| <b>2002; Reddan</b>     | USA                 | Retrospective cohort | ESRD Core Indicators/ CPM Project                 | 8,154  | 1999      | Hemodialysis                                     | 53   | 0    | 40   |
| <b>2002; Pisoni</b>     | International       | Prospective cohort   | DOPPS study                                       | 2,073  | 1996-2000 | Hemodialysis                                     | 55   | 0    | 36   |
| <b>2002; Iseki</b>      | Japan               | Prospective cohort   | Okinawa Dialysis Study                            | 1,243  | 1991-2001 | Hemodialysis                                     | 58.3 | 0    | 17.8 |

|                              |                |                      |                                     |        |           |                                                   |      |      |      |
|------------------------------|----------------|----------------------|-------------------------------------|--------|-----------|---------------------------------------------------|------|------|------|
| <b>2002; Stack</b>           | USA            | Retrospective cohort | USRDS                               | 3,793  | 1996-1997 | Hemodialysis/ Peritoneal dialysis                 | 53   | 48.4 | 43   |
| <b>2001; Winkelmayer</b>     | USA            | Retrospective cohort | New Jersey Medicare/Medicaid claims | 3,014  | 1990-1996 | Hemodialysis/ Peritoneal dialysis                 | 56.2 | 22.2 | 29   |
| <b>2000; Stehman-Breen</b>   | USA            | Prospective cohort   | USRDS                               | 1,449  | 1993-1994 | Hemodialysis                                      | 53   | 0    | 51   |
| <b>2000; Allon</b>           | USA            | Prospective cohort   | HEMO study                          | 1,824  | 1995-1999 | Hemodialysis, age <80 years                       | 48.6 | 0    | 43.6 |
| <b>2000; Schaubel</b>        | Canada         | Retrospective cohort | CORR                                | 33,589 | 1981-1996 | Hemodialysis/ Peritoneal dialysis                 | 59.9 | 35.2 | 23.8 |
| <b>2000; Garg</b>            | USA            | Prospective cohort   | United Network for Organ Sharing    | 7,594  | 1986-1993 | ESKD                                              | 51.6 | N/A  | 34.8 |
| <b>1999; Chandna</b>         | United Kingdom | Retrospective cohort | Study data                          | 292    | 1992-1996 | Hemodialysis/ Peritoneal dialysis                 | 66   | N/A  | 20   |
| <b>1996; Bleyer</b>          | USA            | Retrospective cohort | Study data                          | 550    | 1990-1993 | Hemodialysis/ Peritoneal dialysis                 | N/A  | 21.8 | 44.2 |
| <b>1996; Medina</b>          | USA            | Prospective cohort   | 32 centers                          | 584    | 1988-1991 | Hemodialysis, diabetic nephropathy                | 42.1 | 0    | 100  |
| <b>1995; Barker-Cummings</b> | USA            | Retrospective cohort | ESRD Network                        | 10,726 | 1989-1991 | Hemodialysis/ Peritoneal dialysis                 | 49.6 | 21.8 | 32.9 |
| <b>1994; Cowie</b>           | USA            | Retrospective cohort | Michigan Kidney Registry            | 594    | 1974-1983 | Hemodialysis, age <65 years, diabetic nephropathy | 54.4 | 0    | 100  |
| <b>1994; Puqh</b>            | USA            | Retrospective cohort | Texas Kidney Health Program         | 11,978 | 1975-1985 | Hemodialysis/ Peritoneal dialysis, age ≥20 years  | N/A  | 6.1  | 27.2 |
| <b>1992; Soucie</b>          | USA            | Prospective cohort   | Study data                          | 8,315  | 1989-1990 | Hemodialysis                                      | 47   | 0    | 19.6 |

N/A: not applicable; ESKD: end-stage kidney disease; USRDS: United States Renal Data System; CORR: Canadian Organ Replacement Register; ANZDATA: Australia and New Zealand Dialysis and Transplant Register; BRAZPD: Brazilian Peritoneal Dialysis Multicenter Study; DMMS: Dialysis Morbidity and Mortality Study; DOPPS: Dialysis Outcomes and Practice Patterns Study; REIN: Renal Epidemiology and Information Network; SSOP: Socioeconomic Status on the Outcome of Peritoneal Dialysis; PKDC: Polokwane Kidney and Dialysis Centre; ATTOM: Access to Transplantation and Transplant Outcome Measures; NECOSAD: Netherlands Cooperative Study on the Adequacy of Dialysis; CPM: Clinical Performance Measures; ERDA-EDTA: European Renal Association-European Dialysis and Transplant Association; ATTOM: Access to Transplantation and Transplant Outcome Measures; ArMORR: Accelerated Mortality on Renal Replacement; CRIC: Chronic Renal Insufficiency Cohort; HEMO: Hemodialysis

**Suppl. Table S3.** Definitions of income, education and occupation in the included studies

| <b>Study</b>                     | <b>Income</b>                               | <b>Education</b>                  | <b>Occupation</b>       |
|----------------------------------|---------------------------------------------|-----------------------------------|-------------------------|
| <b>1992; Soucie</b>              | -                                           | >12 vs. <8 years                  | -                       |
| <b>1995; Barker-Cummings</b>     | -                                           | >12 vs. <8 years                  | Employed vs. unemployed |
| <b>2000; Stehman-Breen</b>       | -                                           | College vs. high school graduate  | Employed vs. unemployed |
| <b>2000; Allon</b>               | ≥\$7,500 vs. <\$7,500 per year              | College vs. high school graduate  | -                       |
| <b>2003; Oniscu</b>              | Area-level deprivation index                |                                   |                         |
| <b>2004; Jager</b>               | -                                           | High vs. low                      | Employed vs. unemployed |
| <b>2005; Kutner</b>              | -                                           | College vs. high school graduate  | Employed vs. unemployed |
| <b>2006; Caskey</b>              | Area-level Townsend Index deprivation score |                                   |                         |
| <b>2007; Gill</b>                | ZIP-code median household income            | -                                 | -                       |
| <b>2008; Sanabria</b>            | Highest vs. lowest                          | Postgraduate vs. illiterate       | -                       |
| <b>2008; Schaeffner</b>          | -                                           | College graduate vs. <high school | -                       |
| <b>2009; Eisenstein</b>          | ZIP-code median household income            | -                                 | -                       |
| <b>2009; Feyssa</b>              | -                                           | -                                 | Employed vs. unemployed |
| <b>2010; Huang</b>               | -                                           | High vs. low                      | Employed vs. unemployed |
| <b>2010; Sandhu</b>              | Social adaptability index                   | -                                 | -                       |
| <b>2011; Bastos</b>              | Family income                               | -                                 | -                       |
| <b>2011; Machado</b>             | Area-level Human Development Index          |                                   |                         |
| <b>2012; Marinovich</b>          | Income vs. no income                        | -                                 | -                       |
| <b>2012; Xu</b>                  | >\$6,320 vs. <\$3,160                       | College vs. primary school        | -                       |
| <b>2012; Huang</b>               | -                                           | ≥High-school vs. <high-school     | -                       |
| <b>2012; Lockridge</b>           | -                                           | >High-school vs. <high-school     | -                       |
| <b>2012; Neri</b>                | -                                           | -                                 | Employed vs. unemployed |
| <b>2012; Udayaraj</b>            | Area-level Townsend Index                   | -                                 | -                       |
| <b>2012; Goldfarb-Rumyantzev</b> | -                                           | College graduate vs. <high-school | -                       |
| <b>2012; Garg</b>                | Social adaptability index                   | -                                 | -                       |

|                                  |                                                                        |                                      |                          |
|----------------------------------|------------------------------------------------------------------------|--------------------------------------|--------------------------|
| <b>2013; Kimmel</b>              | ZIP-code median household income                                       | -                                    | -                        |
| <b>2014; Goldfarb-Rumyantzev</b> | -                                                                      | -                                    | Full time vs. unemployed |
| <b>2014; Grace</b>               | Area-level Index of Relative Socio-Economic Advantage and Disadvantage |                                      |                          |
| <b>2014; Yang</b>                | -                                                                      | >High-school vs. primary school      | -                        |
| <b>2014; Teixeira</b>            | -                                                                      | >8 vs. ≤8 years                      | -                        |
| <b>2015; Nee</b>                 | ZIP-code median household income                                       | -                                    | -                        |
| <b>2015; Wang</b>                | -                                                                      | ≥ Primary school vs. illiterate      | -                        |
| <b>2015; Ward</b>                | Area-level 2011 Pobal Haase Pratschke Deprivation Index                |                                      |                          |
| <b>2015b; Ward</b>               | Area-level 2011 Pobal Haase Pratschke Deprivation Index                |                                      |                          |
| <b>2016; Shabankhani</b>         | -                                                                      | -                                    | Employed vs. unemployed  |
| <b>2016; Kihal-Talantikite</b>   | -                                                                      | -                                    | Employed vs. unemployed  |
| <b>2016; Molmenti</b>            | -                                                                      | College graduate vs. <high-school    | -                        |
| <b>2017; Wimink</b>              | Area-level deprivation index                                           |                                      |                          |
| <b>2017; Gulcan</b>              | -                                                                      | -                                    | Employed vs. unemployed  |
| <b>2017; Kim</b>                 | -                                                                      | ≥High-school vs. <middle-school      | -                        |
| <b>2017; Chan</b>                | Area-level Index of Relative Socio-Economic Advantage and Disadvantage |                                      |                          |
| <b>2017; Imanishi</b>            | -                                                                      | University graduate vs. <high-school | Employed vs. unemployed  |
| <b>2017; Zhang</b>               | Disposable income                                                      | >12 vs. ≤9 years                     | -                        |
| <b>2017; Choi</b>                | High vs. medical aid                                                   | -                                    | -                        |
| <b>2017; Taber</b>               | -                                                                      | College graduate vs. <high-school    | -                        |
| <b>2018; Lin</b>                 | -                                                                      | -                                    | Employed vs. unemployed  |
| <b>2018; Krishnashamy</b>        | Area-level Index of Relative Socio-Economic Advantage and Disadvantage |                                      |                          |
| <b>2018; Keddis</b>              | Above vs. below poverty                                                | ≥High-school vs. <high-school        |                          |
| <b>2018; Peng</b>                | -                                                                      | -                                    | Employed vs. unemployed  |
| <b>2018b; Zhang</b>              | Individual disposable income                                           | >High school vs. <high school        | -                        |
| <b>2018; Chatelet</b>            | European Deprivation Index                                             |                                      |                          |
| <b>2019; Nee</b>                 | ZIP-code median household income                                       | -                                    | -                        |



|                           |                                                                        |                               |                               |
|---------------------------|------------------------------------------------------------------------|-------------------------------|-------------------------------|
| <b>2019; Ke</b>           | Area-level household income                                            | -                             | -                             |
| <b>2019; King</b>         | -                                                                      | >High-school vs. ≤high-school | -                             |
| <b>2019; Naylor</b>       | Area-level median household income                                     | -                             | -                             |
| <b>2020; Krishnashamy</b> | Area-level Index of Relative Socio-Economic Advantage and Disadvantage |                               |                               |
| <b>2020; Yolgosteren</b>  | -                                                                      | College vs. primary school    | -                             |
| <b>2020; Hayat</b>        | Area-level Zealand Deprivation Index                                   |                               |                               |
| <b>2020; Pruthi</b>       | -                                                                      | ≥High-school vs. <high-school | Full/part time vs. unemployed |
| <b>2020; Ng</b>           | Household ≥\$25,000 vs. <\$25,000 per year                             | ≥High-school vs. <high-school | -                             |
| <b>2020; Park</b>         | -                                                                      | -                             | Employed vs. unemployed       |
| <b>2021; Barth</b>        | Active vs. inactive                                                    | -                             | -                             |
| <b>2021; Wesselman</b>    | Household ≥\$50,000 vs. <\$50,000 per year                             | -                             | -                             |
| <b>2021; Belyaev</b>      | Area-level Zealand Deprivation Index                                   |                               |                               |
| <b>2021; Rita</b>         | -                                                                      | >High-school vs. ≤high-school | -                             |
| <b>2021; Park</b>         | Highest income vs. aided                                               | -                             | -                             |

## Included studies

1. Ahearn P, Johansen KL, McCulloch CE, Grimes BA, Ku E. Sex Disparities in Risk of Mortality Among Children With ESRD. *Am J Kidney Dis.* 2019;73(2):156-162. doi:10.1053/J.AJKD.2018.07.019.
2. Allon M, Ornt DB, Schwab SJ, et al. Factors associated with the prevalence of arteriovenous fistulas in hemodialysis patients in the HEMO study. Hemodialysis (HEMO) Study Group. *Kidney Int.* 2000;58(5):2178-2185. doi:10.1111/J.1523-1755.2000.00391.X.
3. Arce CM, Goldstein BA, Mitani AA, Lenihan CR, Winkelmayer WC. Differences in access to kidney transplantation between Hispanic and non-Hispanic whites by geographic location in the United States. *Clin J Am Soc Nephrol.* 2013;8(12):2149-2157. doi:10.2215/CJN.01560213.
4. Arce CM, Lenihan CR, Montez-Rath ME, Winkelmayer WC. Comparison of longer-term outcomes after kidney transplantation between Hispanic and non-Hispanic whites in the United States. *Am J Transplant.* 2015;15(2):499-507. doi:10.1111/AJT.13043.
5. Arhuidese IJ, Aji EA, Muhammad R, Dhaliwal J, Shukla AJ, Malas MB. Racial differences in utilization and outcomes of hemodialysis access in the United States. *J Vasc Surg.* 2020;71(5):1664-1673. doi:10.1016/J.JVS.2019.07.092.
6. Arya S, Melanson TA, George EL, et al. Racial and Sex Disparities in Catheter Use and Dialysis Access in the United States Medicare Population. *J Am Soc Nephrol.* 2020;31(3):625-636. doi:10.1681/ASN.2019030274.
7. Barker Cummings C, McClellan W, Soucie JM, Krisher J. Ethnic Differences in the Use of Peritoneal Dialysis as Initial Treatment for End-Stage Renal Disease. *JAMA.* 1995;274(23):1858-1862. doi:10.1001/JAMA.1995.03530230044028.
8. Barth A, Szöllösi GJ, Nemes B. Factors Affecting Access to the Kidney Transplant Waiting List in Eastern Hungary. *Transplant Proc.* 2021;53(5):1418-1422. doi:10.1016/J.TRANSPROCEED.2021.01.044.
9. Bastos K de A, Qureshi AR, Lopes AA, et al. Family income and survival in Brazilian Peritoneal Dialysis Multicenter Study Patients (BRAZPD): time to revisit a myth? *Clin J Am Soc Nephrol.* 2011;6(7):1676-1683. doi:10.2215/CJN.09041010.
10. Bayat S, Frimat L, Thilly N, Loos C, Briançon S, Kessler M. Medical and non-medical determinants of access to renal transplant waiting list in a French community-based network of care. *Nephrol Dial Transplant.* 2006;21(10):2900-2907. doi:10.1093/NDT/GFL329.
11. Belyaev AM, Henry L, Dittmer I, MuthuKumaraswamy C, Davies CE, Bergin CJ. Socioeconomic inequality: accessibility and outcomes after renal transplantation in New Zealand. *ANZ J Surg.* 2021;91(12):2656-2662. doi:10.1111/ANS.16997.
12. Van Den Beukel TO, Hommel K, Kamper AL, et al. Differences in survival on chronic dialysis treatment between ethnic groups in Denmark: a population-wide, national cohort study. *Nephrol Dial Transplant.* 2016;31(7):1160-1167. doi:10.1093/NDT/GFV359.
13. Van Den Beukel TO, Verduijn M, Le Cessie S, et al. The role of psychosocial factors in ethnic differences in survival on dialysis in the Netherlands. *Nephrol Dial Transplant.* 2012;27(6):2472-2479. doi:10.1093/NDT/GFR631.
14. Bleyer AJ, Tell GS, Evans GW, Ettinger WH, Burkart JM. Survival of patients undergoing renal replacement therapy in one center with special emphasis on racial differences. *Am J Kidney Dis.* 1996;28(1):72-81. doi:10.1016/S0272-6386(96)90133-X.
15. Burrows NR, Cho P, Bullard KMK, Narva AS, Eggers PW. Survival on dialysis among American Indians and Alaska Natives with diabetes in the United States, 1995-2010. *Am J Public Health.* 2014;104 Suppl 3(Suppl 3). doi:10.2105/AJPH.2014.301942.
16. Carrero JJ, de Jager DJ, Verduijn M, et al. Cardiovascular and noncardiovascular mortality among men and women starting dialysis. *Clin J Am Soc Nephrol.* 2011;6(7):1722-1730. doi:10.2215/CJN.11331210.
17. Caskey FJ, Roderick P, Steenkamp R, et al. Social deprivation and survival on renal replacement therapy in England and Wales. *Kidney Int.* 2006;70(12):2134-2140. doi:10.1038/SJ.KI.5001999.

18. Cass A, Cunningham J, Snelling P, Wang Z, Hoy W. Renal transplantation for Indigenous Australians: identifying the barriers to equitable access. *Ethn Health*. 2003;8(2):111-119. doi:10.1080/13557850303562.
19. Chakkeria HA, O'Hare AM, Johansen KL, et al. Influence of race on kidney transplant outcomes within and outside the Department of Veterans Affairs. *J Am Soc Nephrol*. 2005;16(1):269-277. doi:10.1681/ASN.2004040333.
20. Chan S, Cho Y, Koh YH, et al. Association of Socio-Economic Position with Technique Failure and Mortality in Australian Non-Indigenous Peritoneal Dialysis Patients. *Perit Dial Int*. 2017;37(4):397-406. doi:10.3747/PDI.2016.00209.
21. Chandna SM, Schulz J, Lawrence C, Greenwood RN, Farrington K. Is there a rationale for rationing chronic dialysis? A hospital based cohort study of factors affecting survival and morbidity. *BMJ*. 1999;318(7178):217-223. doi:10.1136/BMJ.318.7178.217.
22. Chang TI, Oh HJ, Kang EW, et al. A low serum bicarbonate concentration as a risk factor for mortality in peritoneal dialysis patients. *PLoS One*. 2013;8(12). doi:10.1371/JOURNAL.PONE.0082912.
23. Châtelet V, Bayat-Makoei S, Vigneau C, Launoy G, Lobbedez T. Renal transplantation outcome and social deprivation in the French healthcare system: a cohort study using the European Deprivation Index. *Transpl Int*. 2018;31(10):1089-1098. doi:10.1111/TRL.13161.
24. Chidambaram M, Bargman JM, Quinn RR, Austin PC, Hux JE, Laupacis A. Patient and physician predictors of peritoneal dialysis technique failure: a population based, retrospective cohort study. *Perit Dial Int*. 2011;31(5):565-573. doi:10.3747/PDI.2010.00096.
25. Choi Y, Shin J, Park JT, Cho KH, Park EC, Kim TH. Disparities in Kidney Transplantation Access among Korean Patients Initiating Dialysis: A Population-Based Cohort Study Using National Health Insurance Data (2003-2013). *Am J Nephrol*. 2017;45(1):32-39. doi:10.1159/000450979.
26. Chung SH, Han DC, Noh H, et al. Risk factors for mortality in diabetic peritoneal dialysis patients. *Nephrol Dial Transplant*. 2010;25(11):3742-3748. doi:10.1093/NDT/GFQ233.
27. Chung SH, Heimbürger O, Lindholm B, Lee HB. Peritoneal dialysis patient survival: a comparison between a Swedish and a Korean centre. *Nephrol Dial Transplant*. 2005;20(6):1207-1213. doi:10.1093/NDT/GFH772.
28. Cirillo M, Palladino R, Ciacci C, et al. Kidney Replacement Treatment in South-Western Italy (Campania): Population-Based Study on Gender and Residence Inequalities in Health Care Access. *J Clin Med*. 2021;10(3):1-11. doi:10.3390/JCM10030449.
29. Cole N, Bedford M, Cai A, Jones C, Cairns H, Jayawardene S. Black ethnicity predicts better survival on dialysis despite greater deprivation and co-morbidity: a UK study. *Clin Nephrol*. 2014;82(2):77-82. doi:10.5414/CN108247.
30. Copeland TP, Hye RJ, Lawrence PF, Woo K. Association of Race and Ethnicity with Vascular Access Type Selection and Outcomes. *Ann Vasc Surg*. 2020;62:142-147. doi:10.1016/J.AVSG.2019.08.068.
31. Couchoud C, Bayat S, Villar E, Jacquelinet C, Ecochard R. A new approach for measuring gender disparity in access to renal transplantation waiting lists. *Transplantation*. 2012;94(5):513-519. doi:10.1097/TP.0B013E31825D156A.
32. Cowie CC, Port FK, Rust KF, Harris MI. Differences in survival between black and white patients with diabetic end-stage renal disease. *Diabetes Care*. 1994;17(7):681-687. doi:10.2337/DIACARE.17.7.681.
33. Eisenstein EL, Sun JL, Anstrom KJ, et al. Do income level and race influence survival in patients receiving hemodialysis? *Am J Med*. 2009;122(2):170-180. doi:10.1016/J.AMJMED.2008.08.025.
34. Fernandes NMDS, Hoekstra T, Van Den Beukel TO, et al. Association of ethnicity and survival in peritoneal dialysis: a cohort study of incident patients in Brazil. *Am J Kidney Dis*. 2013;62(1):89-96. doi:10.1053/J.AJKD.2013.02.364.
35. Feyssa E, Jones-Burton C, Ellison G, Philosophie B, Howell C. Racial/ethnic disparity in kidney transplantation outcomes: influence of donor and recipient characteristics. *J Natl Med Assoc*. 2009;101(2):111-115. doi:10.1016/S0027-9684(15)30822-1.
36. Garg J, Karim M, Tang H, et al. Social adaptability index predicts kidney transplant outcome: a single-center retrospective analysis. *Nephrol Dial Transplant*. 2012;27(3):1239-1245. doi:10.1093/NDT/GFR445.

37. Garg PP, Furth SL, Fivush BA, Powe NR. Impact of gender on access to the renal transplant waiting list for pediatric and adult patients. *J Am Soc Nephrol.* 2000;11(5):958-964. doi:10.1681/ASN.V115958.
38. Gill JS, Hussain S, Rose C, Hariharan S, Tonelli M. Access to kidney transplantation among patients insured by the United States Department of Veterans Affairs. *J Am Soc Nephrol.* 2007;18(9):2592-2599. doi:10.1681/ASN.2007010050.
39. Gill JS, Rose C, Joffres Y, Landsberg D, Gill J. Variation in Dialysis Exposure Prior to Nonpreemptive Living Donor Kidney Transplantation in the United States and Its Association With Allograft Outcomes. *Am J Kidney Dis.* 2018;71(5):636-647. doi:10.1053/J.AJKD.2017.11.012.
40. Goldfarb-Rumyantzev AS, Sandhu GS, Barenbaum A, et al. Education is associated with reduction in racial disparities in kidney transplant outcome. *Clin Transplant.* 2012;26(6):891-899. doi:10.1111/J.1399-0012.2012.01662.X.
41. Goldfarb-Rumyantzev AS, Syed W, Patibandla BK, et al. Geographic disparities in arteriovenous fistula placement in patients approaching hemodialysis in the United States. *Hemodial Int.* 2014;18(3):686-694. doi:10.1111/HDI.12141.
42. Grace BS, Clayton PA, Gray NA, McDonald SP. Socioeconomic differences in the uptake of home dialysis. *Clin J Am Soc Nephrol.* 2014;9(5):929-935. doi:10.2215/CJN.08770813.
43. Gulcan E, Kidir V, Keles M, Cankaya E, Uyanik A, Saatci F. Factors affecting patient survival and technical survival in patients undergoing peritoneal dialysis. *Int J Clin Exp Med.* 2017;10(1):1004-1014.
44. Hall YN, Choi AI, Xu P, O'Hare AM, Chertow GM. Racial ethnic differences in rates and determinants of deceased donor kidney transplantation. *J Am Soc Nephrol.* 2011;22(4):743-751. doi:10.1681/ASN.2010080819.
45. Hall YN, O'Hare AM, Young BA, Boyko EJ, Chertow GM. Neighborhood poverty and kidney transplantation among US Asians and Pacific Islanders with end-stage renal disease. *Am J Transplant.* 2008;8(11):2402-2409. doi:10.1111/J.1600-6143.2008.02413.X.
46. Hayat A, Saweirs W. Predictors of technique failure and mortality on peritoneal dialysis: An analysis of New Zealand peritoneal dialysis registry data. *Nephrology (Carlton).* 2021;26(6):530-540. doi:10.1111/NEP.13837.
47. Hemmelgarn BR, Chou S, Wiebe N, et al. Differences in use of peritoneal dialysis and survival among East Asian, Indo Asian, and white ESRD patients in Canada. *Am J Kidney Dis.* 2006;48(6):964-971. doi:10.1053/J.AJKD.2006.08.021.
48. Howson P, Irish AB, D'Orsogna L, et al. Allograft and Patient Outcomes Between Indigenous and Nonindigenous Kidney Transplant Recipients. *Transplantation.* 2020;104(4):847-855. doi:10.1097/TP.0000000000002891.
49. Huang HC, Wang JY, Chang CC, Chiu PF, Chiang MC, Yang Y. Nonclinical factors associated with treatment with peritoneal dialysis in ESRD patients in Taiwan. *Perit Dial Int.* 2010;30(6):638-643. doi:10.3747/PDI.2009.00112.
50. Huang WH, Lin JL, Lin-Tan DT, Chen KH, Hsu CW, Yen TH. Education level is associated with mortality in male patients undergoing maintenance hemodialysis. *Blood Purif.* 2013;35(4):316-326. doi:10.1159/000351613.
51. Huria T, Palmer S, Beckert L, Williman J, Pitama S. Inequity in dialysis related practices and outcomes in Aotearoa/New Zealand: a Kaupapa Māori analysis. *Int J Equity Health.* 2018;17(1). doi:10.1186/S12939-018-0737-9.
52. Ilori TO, Adedinsewo DA, Odewole O, et al. Racial and Ethnic Disparities in Graft and Recipient Survival in Elderly Kidney Transplant Recipients. *J Am Geriatr Soc.* 2015;63(12):2485-2493. doi:10.1111/JGS.13845.
53. Imanishi Y, Fukuma S, Karaboyas A, et al. Associations of employment status and educational levels with mortality and hospitalization in the dialysis outcomes and practice patterns study in Japan. *PLoS One.* 2017;12(3). doi:10.1371/JOURNAL.PONE.0170731.
54. Iseki K, Yamazato M, Tozawa M, Takishita S. Hypocholesterolemia is a significant predictor of death in a cohort of chronic hemodialysis patients. *Kidney Int.* 2002;61(5):1887-1893. doi:10.1046/J.1523-1755.2002.00324.X.
55. Isla RAT, Ameh OI, Mapiye D, et al. Baseline Predictors of Mortality among Predominantly Rural-Dwelling End-Stage Renal Disease Patients on Chronic Dialysis Therapies in Limpopo, South Africa. *PLoS One.* 2016;11(6). doi:10.1371/JOURNAL.PONE.0156642.

56. Jager KJ, Korevaar JC, Dekker FW, Krediet RT, Boeschoten EW. The effect of contraindications and patient preference on dialysis modality selection in ESRD patients in The Netherlands. *Am J Kidney Dis.* 2004;43(5):891-899. doi:10.1053/J.AJKD.2003.12.051.
57. Ke C, Kim SJ, Shah BR, et al. Impact of Socioeconomic Status on Incidence of End-Stage Renal Disease and Mortality After Dialysis in Adults With Diabetes. *Can J diabetes.* 2019;43(7):483-489.e4. doi:10.1016/J.CJJD.2019.04.006.
58. Keddis MT, Sharma A, Ilyas M, et al. Transplant center assessment of the inequity in the kidney transplant process and outcomes for the Indigenous American patients. *PLoS One.* 2018;13(11). doi:10.1371/JOURNAL.PONE.0207819.
59. Kihal-Talantikite W, Vigneau C, Deguen S, Siebert M, Couchoud C, Bayat S. Influence of Socio-Economic Inequalities on Access to Renal Transplantation and Survival of Patients with End-Stage Renal Disease. *PLoS One.* 2016;11(4). doi:10.1371/JOURNAL.PONE.0153431.
60. Kim HJ, Lee J, Park M, et al. Lower Education Level Is a Risk Factor for Peritonitis and Technique Failure but Not a Risk for Overall Mortality in Peritoneal Dialysis under Comprehensive Training System. *PLoS One.* 2017;12(1). doi:10.1371/JOURNAL.PONE.0169063.
61. Kim HW, Kim SH, Kim YO, et al. The Impact of Timing of Dialysis Initiation on Mortality in Patients with Peritoneal Dialysis. *Perit Dial Int.* 2015;35(7):703-711. doi:10.3747/PDI.2013.00328.
62. Kimmel PL, Fwu CW, Eggers PW. Segregation, income disparities, and survival in hemodialysis patients. *J Am Soc Nephrol.* 2013;24(2):293-301. doi:10.1681/ASN.2012070659.
63. King KL, Husain SA, Jin Z, Brennan C, Mohan S. Trends in Disparities in Preemptive Kidney Transplantation in the United States. *Clin J Am Soc Nephrol.* 2019;14(10):1500-1511. doi:10.2215/CJN.03140319.
64. Krishnasamy R, Gray NA. Low socio-economic status adversely effects dialysis survival in Australia. *Nephrology (Carlton).* 2018;23(5):453-460. doi:10.1111/NEP.13053.
65. Krishnasamy R, Jegatheesan D, Lawton P, Gray NA. Socioeconomic status and dialysis quality of care. *Nephrology (Carlton).* 2020;25(5):421-428. doi:10.1111/NEP.13629.
66. Ku E, Yang W, McCulloch CE, et al. Race and Mortality in CKD and Dialysis: Findings From the Chronic Renal Insufficiency Cohort (CRIC) Study. *Am J Kidney Dis.* 2020;75(3):394-403. doi:10.1053/J.AJKD.2019.08.011.
67. Kutner NG, Zhang R, Barnhart H, Collins AJ. Health status and quality of life reported by incident patients after 1 year on haemodialysis or peritoneal dialysis. *Nephrol Dial Transplant.* 2005;20(10):2159-2167. doi:10.1093/NDT/GFH973.
68. Lawton PD, Cunningham J, Zhao Y, et al. Survival of Indigenous Australians receiving renal replacement therapy: closing the gap? *Med J Aust.* 2015;202(4):200-205. doi:10.5694/MJA14.00664.
69. Lin E, Mell MW, Winkelmayer WC, Erickson KF. Health insurance in the first 3 months of hemodialysis and early vascular access. *Clin J Am Soc Nephrol.* 2018;13(12):1866-1875. doi:10.2215/CJN.06660518/-/DCSUPPLEMENTAL.
70. Liu A, Woodside KJ, Augustine JJ, Sarabu N. Racial disparity in kidney transplant survival relates to late rejection and is independent of steroid withdrawal. *Clin Transplant.* 2018;32(9). doi:10.1111/CTR.13381.
71. Liu X, Huang R, Wu H, et al. Patient characteristics and risk factors of early and late death in incident peritoneal dialysis patients. *Sci Rep.* 2016;6. doi:10.1038/SREP32359.
72. Lockridge R, Ting G, Kjellstrand CM. Superior patient and technique survival with very high standard Kt/V in quotidian home hemodialysis. *Hemodial Int.* 2012;16(3):351-362. doi:10.1111/J.1542-4758.2012.00696.X.
73. Lopez-Vargas PA, Craig JC, Gallagher MP, et al. Barriers to timely arteriovenous fistula creation: a study of providers and patients. *Am J Kidney Dis.* 2011;57(6):873-882. doi:10.1053/J.AJKD.2010.12.020.
74. Machado EL, Caiaffa WT, César CC, et al. Iniquities in the access to renal transplant for patients with end-stage chronic renal disease in Brazil. *Cad Saude Publica.* 2011;27 Suppl 2(SUPPL.2):284-297. doi:10.1590/S0102-311X2011001400015.
75. MacRae JM, Clarke A, Ahmed SB, et al. Sex differences in the vascular access of hemodialysis patients: a cohort study. *Clin Kidney J.* 2021;14(5):1412-1418. doi:10.1093/CKJ/SFAA132.

76. Marinovich S, Lavorato C, Rosa-Diez G, Bisigniano L, Fernández V, Hansen-Krogh D. The lack of income is associated with reduced survival in chronic haemodialysis. *Nefrologia*. 2012;32(1):79-88. doi:10.3265/NEFROLOGIA.PRE2011.NOV.11110.
77. Matsuoka L, Alicuben E, Woo K, et al. Kidney transplantation in the Hispanic population. *Clin Transplant*. 2016;30(2):118-123. doi:10.1111/CTR.12662.
78. McGill RL, Lacson E. Sex, race, and hemodialysis vascular access processes. *J Vasc Access*. 2017;18(2):132-138. doi:10.5301/JVA.5000657.
79. McKercher C, Jose MD, Grace B, Clayton PA, Walter M. Gender differences in the dialysis treatment of Indigenous and non-Indigenous Australians. *Aust N Z J Public Health*. 2017;41(1):15-20. doi:10.1111/1753-6405.12621.
80. Medina RA, Pugh JA, Monterrosa A, Cornell J. Minority advantage in diabetic end-stage renal disease survival on hemodialysis: due to different proportions of diabetic type? *Am J Kidney Dis*. 1996;28(2):226-234. doi:10.1016/S0272-6386(96)90306-6.
81. Melk A, Schmidt BMW, Geyer S, Epping J. Sex disparities in dialysis initiation, access to waitlist, transplantation and transplant outcome in German patients with renal disease-A population based analysis. *PLoS One*. 2020;15(11). doi:10.1371/JOURNAL.PONE.0241556.
82. Mircescu G, Garneata L, Florea L, et al. The success story of peritoneal dialysis in Romania: Analysis of differences in mortality by dialysis modality and influence of risk factors in a national cohort. *Perit Dial Int*. 2006;26(2):266-275. doi:10.1177/089686080602600224.
83. Molmenti EP, Alex A, Rosen L, et al. Recipient Criteria Predictive of Graft Failure in Kidney Transplantation. *Int J Angiol*. 2016;25(1):29-38. doi:10.1055/S-0035-1563605.
84. de Moraes TP, Figueiredo AE, de Campos LG, Olandoski M, Barretti P, Pecoits-Filho R. Characterization of the BRAZPD II cohort and description of trends in peritoneal dialysis outcome across time periods. *Perit Dial Int*. 2014;34(7):714-723. doi:10.3747/PDI.2013.00282.
85. Mucsi I, Bansal A, Famure O, et al. Ethnic Background Is a Potential Barrier to Living Donor Kidney Transplantation in Canada: A Single-Center Retrospective Cohort Study. *Transplantation*. 2017;101(4):e142-e151. doi:10.1097/TP.0000000000001658.
86. Murphy KA, Jackson JW, Purnell TS, et al. Association of Socioeconomic Status and Comorbidities with Racial Disparities during Kidney Transplant Evaluation. *Clin J Am Soc Nephrol*. 2020;15(6):843-851. doi:10.2215/CJN.12541019.
87. de Mutsert R, Grootendorst DC, Indemans F, Boeschoten EW, Krediet RT, Dekker FW. Association between serum albumin and mortality in dialysis patients is partly explained by inflammation, and not by malnutrition. *J Ren Nutr*. 2009;19(2):127-135. doi:10.1053/J.JRN.2008.08.003.
88. Myaskovsky L, Kendall K, Li X, et al. Unexpected Race and Ethnicity Differences in the US National Veterans Affairs Kidney Transplant Program. *Transplantation*. 2019;103(12):2701-2714. doi:10.1097/TP.0000000000002905.
89. Naylor KL, Knoll GA, Shariff SZ, et al. Socioeconomic Status and Kidney Transplant Outcomes in a Universal Healthcare System: A Population-based Cohort Study. *Transplantation*. 2019;103(5):1024-1035. doi:10.1097/TP.0000000000002383.
90. Nee R, Moon DS, Jindal RM, et al. Impact of Poverty and Health Care Insurance on Arteriovenous Fistula Use among Incident Hemodialysis Patients. *Am J Nephrol*. 2015;42(4):328-336. doi:10.1159/000441804.
91. Nee R, Thurlow JS, Norris KC, et al. Association of Race and Poverty With Mortality Among Nursing Home Residents on Maintenance Dialysis. *J Am Med Dir Assoc*. 2019;20(7):904-910. doi:10.1016/J.JAMDA.2019.02.013.
92. Neri L, Gallieni M, Rocca Rey LA, Bertoli SV, Andreucci V, Brancaccio D. Inequalities in transplant waiting list activation across Italian dialysis centers. *Am J Nephrol*. 2013;37(6):575-585. doi:10.1159/000351334.
93. Ng FL, Holt DW, Chang RWS, MacPhee IAM. Black renal transplant recipients have poorer long-term graft survival than CYP3A5 expressers from other ethnic groups. *Nephrol Dial Transplant*. 2010;25(2):628-634. doi:10.1093/NDT/GFP530.

94. Ng YH, Pankratz VS, Leyva Y, et al. Does Racial Disparity in Kidney Transplant Waitlisting Persist After Accounting for Social Determinants of Health? *Transplantation*. 2020;104(7):1445-1455. doi:10.1097/TP.0000000000003002.
95. Oniscu GC, Schalkwijk AAH, Johnson RJ, Brown H, Forsythe JLR. Equity of access to renal transplant waiting list and renal transplantation in Scotland: cohort study. *BMJ*. 2003;327(7426):1261-1263. doi:10.1136/BMJ.327.7426.1261.
96. Pallet N, Thervet E, Alberti C, et al. Kidney transplant in black recipients: are African Europeans different from African Americans? *Am J Transplant*. 2005;5(11):2682-2687. doi:10.1111/J.1600-6143.2005.01057.X.
97. Park KS, Ryu GW, Jhee JH, et al. Serum Ferritin Predicts Mortality Regardless of Inflammatory and Nutritional Status in Patients Starting Dialysis: A Prospective Cohort Study. *Blood Purif*. 2015;40(3):209-217. doi:10.1159/000438819.
98. Park S, Park GC, Park J, et al. Disparity in Accessibility to and Prognosis of Kidney Transplantation According to Economic Inequality in South Korea: A Widening Gap After Expansion of Insurance Coverage. *Transplantation*. 2021;105(2):404-412. doi:10.1097/TP.0000000000003256.
99. Park S, Park J, Kim M, et al. Socioeconomic dependency and kidney transplantation accessibility and outcomes: a nationwide observational cohort study in South Korea. *J Nephrol*. 2021;34(1):211-219. doi:10.1007/S40620-020-00876-0.
100. Patzer RE, Amaral S, Wasse H, Volkova N, Kleinbaum D, McClellan WM. Neighborhood poverty and racial disparities in kidney transplant waitlisting. *J Am Soc Nephrol*. 2009;20(6):1333-1340. doi:10.1681/ASN.2008030335.
101. Patzer RE, Perryman JP, Schrager JD, et al. The role of race and poverty on steps to kidney transplantation in the Southeastern United States. *Am J Transplant*. 2012;12(2):358-368. doi:10.1111/J.1600-6143.2011.03927.X.
102. Peng RB, Lee H, Ke ZT, Saunders MR. Racial disparities in kidney transplant waitlist appearance in Chicago: Is it race or place? *Clin Transplant*. 2018;32(5). doi:10.1111/CTR.13195.
103. Pisoni RL, Young EW, Dykstra DM, et al. Vascular access use in Europe and the United States: results from the DOPPS. *Kidney Int*. 2002;61(1):305-316. doi:10.1046/J.1523-1755.2002.00117.X.
104. Pisoni RL, Zepel L, Fluck R, et al. International Differences in the Location and Use of Arteriovenous Accesses Created for Hemodialysis: Results From the Dialysis Outcomes and Practice Patterns Study (DOPPS). *Am J Kidney Dis*. 2018;71(4):469-478. doi:10.1053/J.AJKD.2017.09.012.
105. Pisoni RL, Zepel L, Zhao J, et al. International Comparisons of Native Arteriovenous Fistula Patency and Time to Becoming Catheter-Free: Findings From the Dialysis Outcomes and Practice Patterns Study (DOPPS). *Am J Kidney Dis*. 2021;77(2):245-254. doi:10.1053/J.AJKD.2020.06.020.
106. Prasad N, Sinha A, Gupta A, et al. Effect of body mass index on outcomes of peritoneal dialysis patients in India. *Perit Dial Int*. 2014;34(4):399-408. doi:10.3747/PDI.2013.00056.
107. Prasad S, Singh S, Duncan N, et al. Ethnicity and survival on dialysis in west London. *Kidney Int*. 2004;66(6):2416-2421. doi:10.1111/J.1523-1755.2004.66017.X.
108. Press R, Carrasquillo O, Nickolas T, Radhakrishnan J, Shea S, Barr RG. Race/ethnicity, poverty status, and renal transplant outcomes. *Transplantation*. 2005;80(7):917-924. doi:10.1097/01.TP.0000173379.53347.31.
109. Promislow S, Hemmelgarn B, Rigatto C, et al. Young aboriginals are less likely to receive a renal transplant: a Canadian national study. *BMC Nephrol*. 2013;14. doi:10.1186/1471-2369-14-11.
110. Pruthi R, Robb MWL, Oniscu GC, et al. Inequity in Access to Transplantation in the United Kingdom. *Clin J Am Soc Nephrol*. 2020;15(6):830-842. doi:10.2215/CJN.11460919.
111. Puqh JA, Tuley MR, Basu S. Survival among Mexican-Americans, non-Hispanic whites, and African-Americans with end-stage renal disease: the emergence of a minority pattern of increased incidence and prolonged survival. *Am J Kidney Dis*. 1994;23(6):803-807. doi:10.1016/S0272-6386(12)80133-8.
112. Purnell TS, Luo X, Cooper LA, et al. Association of Race and Ethnicity With Live Donor Kidney Transplantation in the United States From 1995 to 2014. *JAMA*. 2018;319(1):49-61. doi:10.1001/JAMA.2017.19152.
113. Purnell TS, Xu P, Leca N, Hall YN. Racial differences in determinants of live donor kidney transplantation in the United States. *Am J Transplant*. 2013;13(6):1557-1565. doi:10.1111/AJT.12258.

114. Qian J, Lee T, Thamer M, Zhang Y, Crews DC, Allon M. Racial Disparities in the Arteriovenous Fistula Care Continuum in Hemodialysis Patients. *Clin J Am Soc Nephrol*. 2020;15(12):1796-1803. doi:10.2215/CJN.03600320.
115. Ramanan R, Udayaraj U, Ansell D, et al. Variation between centres in access to renal transplantation in UK: longitudinal cohort study. *BMJ*. 2010;341(7766):238. doi:10.1136/BMJ.C3451.
116. Reddan D, Klassen P, Frankenfield DL, et al. National profile of practice patterns for hemodialysis vascular access in the United States. *J Am Soc Nephrol*. 2002;13(8):2117-2124. doi:10.1097/01.ASN.0000022422.79790.A8.
117. Rita A, Michael K, Geest Sabina D, et al. Demographic, psychosocial and health disparities between living and deceased renal allograft recipients in Switzerland. *Swiss Med Wkly*. 2021;151(31). doi:10.4414/SMW.2021.20532.
118. Robinson BM, Joffe MM, Pisoni RL, Port FK, Feldman HI. Revisiting survival differences by race and ethnicity among hemodialysis patients: the Dialysis Outcomes and Practice Patterns Study. *J Am Soc Nephrol*. 2006;17(10):2910-2918. doi:10.1681/ASN.2005101078.
119. Roderick P, Byrne C, Casula A, et al. Survival of patients from South Asian and Black populations starting renal replacement therapy in England and Wales. *Nephrol Dial Transplant*. 2009;24(12):3774-3782. doi:10.1093/NDT/GFP348.
120. Ros S, Remón C, Qureshi AR, Quiros P, Lindholm B, Carrero JJ. Increased risk of fatal infections in women starting peritoneal dialysis. *Perit Dial Int*. 2013;33(5):487-494. doi:10.3747/PDI.2012.00243.
121. Sanabria M, Muñoz J, Trillos C, et al. Dialysis outcomes in Colombia (DOC) study: a comparison of patient survival on peritoneal dialysis vs hemodialysis in Colombia. *Kidney Int Suppl*. 2008;73(108). doi:10.1038/SJ.KI.5002619.
122. Sandhu GS, Khattak M, Rout P, et al. Social Adaptability Index: application and outcomes in a dialysis population. *Nephrol Dial Transplant*. 2011;26(8):2667-2674. doi:10.1093/NDT/GFQ789.
123. Schaeffner ES, Mehta J, Winkelmayer WC. Educational level as a determinant of access to and outcomes after kidney transplantation in the United States. *Am J Kidney Dis*. 2008;51(5):811-818. doi:10.1053/J.AJKD.2008.01.019.
124. Schaubel DE, Stewart DE, Morrison HI, et al. Sex Inequality in Kidney Transplantation Rates. *Arch Intern Med*. 2000;160(15):2349-2354. doi:10.1001/ARCHINTE.160.15.2349.
125. Schellartz I, Mettang S, Shukri A, Scholten N, Pfaff H, Mettang T. Early Referral to Nephrological Care and the Uptake of Peritoneal Dialysis. An Analysis of German Claims Data. *Int J Environ Res Public Health*. 2021;18(16). doi:10.3390/IJERPH18168359.
126. Sequist TD, Narva AS, Stiles SK, Karp SK, Cass A, Ayanian JZ. Access to renal transplantation among American Indians and Hispanics. *Am J Kidney Dis*. 2004;44(2):344-352. doi:10.1053/J.AJKD.2004.04.039.
127. Shabankhani B, Kazemnejad A, Zaeri F, Espahbodi F, Haji Ahmadi M, Mirkazemi R. Survival Factors in Patients With End-stage Renal Disease in Mazandaran Province, Iran - PubMed. *Iran J Kidney Dis*. 2016;10(2):79-84. <https://pubmed.ncbi.nlm.nih.gov/26921749/>. Accessed June 4, 2022.
128. Shah S, Leonard AC, Meganathan K, Christianson AL, Thakar C V. Gender and Racial Disparities in Initial Hemodialysis Access and Outcomes in Incident End-Stage Renal Disease Patients. *Am J Nephrol*. 2018;48(1):4-14. doi:10.1159/000490624.
129. Shen JJ, Chen L, Vangala S, et al. Socioeconomic Factors and Racial and Ethnic Differences in the Initiation of Home Dialysis. *Kidney Med*. 2020;2(2):105-115. doi:10.1016/J.XKME.2019.11.006.
130. Sood MM, Hemmelgarn B, Rigatto C, et al. Association of modality with mortality among Canadian Aboriginals. *Clin J Am Soc Nephrol*. 2012;7(12):1988-1995. doi:10.2215/CJN.03650412.
131. Sood MM, Komenda P, Sood AR, et al. Adverse outcomes among Aboriginal patients receiving peritoneal dialysis. *C Can Med Assoc J*. 2010;182(13):1433. doi:10.1503/CMAJ.100105.
132. Soucie JM, Neylan JF, McClellan W. Race and sex differences in the identification of candidates for renal transplantation. *Am J Kidney Dis*. 1992;19(5):414-419. doi:10.1016/S0272-6386(12)80947-4.
133. Stack AG. Determinants of modality selection among incident US dialysis patients: results from a national study. *J Am Soc Nephrol*. 2002;13(5):1279-1287. doi:10.1681/ASN.V1351279.



134. Stehman-Breen CO, Sherrard DJ, Gillen D, Caps M. Determinants of type and timing of initial permanent hemodialysis vascular access. *Kidney Int.* 2000;57(2):639-645. doi:10.1046/J.1523-1755.2000.00885.X.
135. Sypek MP, Clayton PA, Lim W, et al. Access to waitlisting for deceased donor kidney transplantation in Australia. *Nephrology (Carlton)*. 2019;24(7):758-766. doi:10.1111/NEP.13484.
136. Taber DJ, Gebregziabher M, Payne EH, Srinivas T, Baliga PK, Egede LE. Overall Graft Loss Versus Death-Censored Graft Loss: Unmasking the Magnitude of Racial Disparities in Outcomes Among US Kidney Transplant Recipients. *Transplantation*. 2017;101(2):402-410. doi:10.1097/TP.0000000000001119.
137. Teixeira FIR, Lopes MLH, Silva GA dos S, Santos RF. Survival of hemodialysis patients at a university hospital. *J Bras Nefrol*. 2015;37(1):64-71. doi:10.5935/0101-2800.20150010.
138. Trinh E, Na Y, Sood MM, Chan CT, Perl J. Racial Differences in Home Dialysis Utilization and Outcomes in Canada. *Clin J Am Soc Nephrol*. 2017;12(11):1841-1851. doi:10.2215/CJN.03820417.
139. Trivedi PS, Lind KE, Ray CE, Rochon PJ, Ryu RK. Race and Sex Disparities in Outcomes of Dialysis Access Maintenance Interventions. *J Vasc Interv Radiol*. 2018;29(4):476-481.e1. doi:10.1016/J.JVIR.2017.10.018.
140. Udayaraj U, Ben-Shlomo Y, Roderick P, et al. Social deprivation, ethnicity, and access to the deceased donor kidney transplant waiting list in England and Wales. *Transplantation*. 2010;90(3):279-285. doi:10.1097/TP.0B013E3181E346E3.
141. Udayaraj U, Ben-Shlomo Y, Roderick P, et al. Social deprivation, ethnicity, and uptake of living kidney donor transplantation in the United Kingdom. *Transplantation*. 2012;93(6):610-616. doi:10.1097/TP.0B013E318245593F.
142. Villar E, Rabilloud M, Berthoux F, Vialtel P, Labeeuw M, Pouteil-Noble C. A multicentre study of registration on renal transplantation waiting list of the elderly and patients with type 2 diabetes. *Nephrol Dial Transplant*. 2004;19(1):207-214. doi:10.1093/NDT/GFG500.
143. Vogel SL, Singh T, Astor BC, Waheed S. Gender differences in peritoneal dialysis initiation in the US end-stage renal disease population. *Perit Dial Int*. 2020;40(1):57-61. doi:10.1177/0896860819878656.
144. Wallace EL, Lea J, Chaudhary NS, et al. Home Dialysis Utilization Among Racial and Ethnic Minorities in the United States at the National, Regional, and State Level. *Perit Dial Int*. 2017;37(1):21-29. doi:10.3747/PDI.2016.00025.
145. Wang T, Tzviskou E, Chu M, et al. Differences in survival on peritoneal dialysis between oriental Asians and Caucasians: one center's experience. *Int Urol Nephrol*. 2003;35(2):267-274. doi:10.1023/B:UROL.0000020286.83411.D1.
146. Wang Z, Zhang Y, Xiong F, et al. Association between medical insurance type and survival in patients undergoing peritoneal dialysis. *BMC Nephrol*. 2015;16(1). doi:10.1186/S12882-015-0023-7.
147. Ward FL, O'Kelly P, Donohue F, et al. Influence of socioeconomic status on allograft and patient survival following kidney transplantation. *Nephrology (Carlton)*. 2015;20(6):426-433. doi:10.1111/NEP.12410.
148. Ward FL, O'Kelly P, Donohue F, et al. The influence of socioeconomic status on patient survival on chronic dialysis. *Hemodial Int*. 2015;19(4):601-608. doi:10.1111/HDI.12295.
149. Waterman AD, Peipert JD, Hyland SS, McCabe MS, Schenk EA, Liu J. Modifiable patient characteristics and racial disparities in evaluation completion and living donor transplant. *Clin J Am Soc Nephrol*. 2013;8(6):995-1002. doi:10.2215/CJN.08880812.
150. Wesselman H, Ford CG, Leyva Y, et al. Social Determinants of Health and Race Disparities in Kidney Transplant. *Clin J Am Soc Nephrol*. 2021;16(2):262-274. doi:10.2215/CJN.04860420.
151. Wiley HRL, Varilek BM, Saucedo-Crespo H, et al. Kidney Transplant Outcomes in Indigenous People of the Northern Great Plains of the United States. *Transplant Proc*. 2021;53(6):1872-1879. doi:10.1016/J.TRANSPROCEED.2021.05.003.
152. Williams A, Richardson C, McCready J, et al. Black Ethnicity is Not a Risk Factor for Mortality or Graft Loss After Kidney Transplant in the United Kingdom. *Exp Clin Transplant*. 2018;16(6):682-689. doi:10.6002/ECT.2018.0241.
153. Wilmink T, Wijewardane A, Lee K, et al. Effect of ethnicity and socioeconomic status on vascular access provision and performance in an urban NHS hospital. *Clin Kidney J*. 2017;10(1):62-67. doi:10.1093/CKJ/SFW099.

154. Winkelmayer WC, Glynn RJ, Levin R, Owen W. J, Avorn J. Late referral and modality choice in end-stage renal disease. *Kidney Int.* 2001;60(4):1547-1554. doi:10.1046/J.1523-1755.2001.00958.X.
155. Wolf M, Betancourt J, Chang Y, et al. Impact of activated vitamin D and race on survival among hemodialysis patients. *J Am Soc Nephrol.* 2008;19(7):1379-1388. doi:10.1681/ASN.2007091002.
156. Woo K, Yao J, Selevan D, Hye RJ. Influence of vascular access type on sex and ethnicity-related mortality in hemodialysis-dependent patients. *Perm J.* 2012;16(2):4-9. doi:10.7812/TPP/12-005.
157. Xu R, Han QF, Zhu TY, et al. Impact of individual and environmental socioeconomic status on peritoneal dialysis outcomes: a retrospective multicenter cohort study. *PLoS One.* 2012;7(11). doi:10.1371/JOURNAL.PONE.0050766.
158. Yan G, Norris KC, Yu AJ, et al. The relationship of age, race, and ethnicity with survival in dialysis patients. *Clin J Am Soc Nephrol.* 2013;8(6):953-961. doi:10.2215/CJN.09180912.
159. Yang ZK, Han QF, Zhu TY, et al. The associations between the family education and mortality of patients on peritoneal dialysis. *PLoS One.* 2014;9(5). doi:10.1371/JOURNAL.PONE.0095894.
160. Yeates KE, Cass A, Sequist TD, et al. Indigenous people in Australia, Canada, New Zealand and the United States are less likely to receive renal transplantation. *Kidney Int.* 2009;76(6):659-664. doi:10.1038/KI.2009.236.
161. Yeates KE, Schaubel DE, Cass A, Sequist TD, Ayanian JZ. Access to renal transplantation for minority patients with ESRD in Canada. *Am J Kidney Dis.* 2004;44(6):1083-1089. doi:10.1053/J.AJKD.2004.08.031.
162. Yolgösteren A. Relationship between hemodialysis patients' educational level and arteriovenous fistula patency. *Vascular.* 2020;28(5):604-608. doi:10.1177/1708538120918417.
163. Zhang X, Melanson TA, Plantinga LC, et al. Racial/ethnic disparities in waitlisting for deceased donor kidney transplantation 1 year after implementation of the new national kidney allocation system. *Am J Transplant.* 2018;18(8):1936-1946. doi:10.1111/AJT.14748.
164. Zhang Y, Gerdtham UG, Rydell H, Jarl J. Socioeconomic Inequalities in the Kidney Transplantation Process: A Registry-Based Study in Sweden. *Transplant direct.* 2018;4(2). doi:10.1097/TXD.0000000000000764.
165. Zhang Y, Jarl J, Gerdtham UG. Are There Inequities in Treatment of End-Stage Renal Disease in Sweden? A Longitudinal Register-Based Study on Socioeconomic Status-Related Access to Kidney Transplantation. *Int J Environ Res Public Health.* 2017;14(2). doi:10.3390/IJERPH14020119.

## Supplementary S4: Risk of bias assessment

Suppl. Table S4. Outcomes of the ROBINS-I evaluation

| Study                    | <i>Confounding</i> | <i>Selection of participants</i> | <i>Classification of exposures</i> | <i>Deviations from intended exposures</i> | <i>Missing data</i> | <i>Measurement of outcomes</i> | <i>Selection of the reported result</i> | <i>Overall</i>  |
|--------------------------|--------------------|----------------------------------|------------------------------------|-------------------------------------------|---------------------|--------------------------------|-----------------------------------------|-----------------|
| <b>2021; Qian</b>        | Low                | Low                              | Low                                | Low                                       | Low                 | Low                            | Low                                     | <b>Low</b>      |
| <b>2021; MacRae</b>      | Low                | Low                              | Low                                | Low                                       | Low                 | Low                            | Low                                     | <b>Low</b>      |
| <b>2021; Pisoni</b>      | Low                | Low                              | Low                                | Low                                       | Low                 | Low                            | Low                                     | <b>Low</b>      |
| <b>2021; Schellartz</b>  | Moderate           | Low                              | Moderate                           | Low                                       | NI                  | Low                            | Low                                     | <b>Moderate</b> |
| <b>2021; Barth</b>       | Low                | Low                              | Low                                | Low                                       | Low                 | Low                            | Low                                     | <b>Low</b>      |
| <b>2021; Wesselman</b>   | Low                | Low                              | Low                                | Low                                       | NI                  | Low                            | Low                                     | <b>Low</b>      |
| <b>2021; Cirillo</b>     | Low                | Low                              | Low                                | Low                                       | NI                  | Low                            | Low                                     | <b>Low</b>      |
| <b>2021; Ahearn</b>      | Low                | Low                              | Low                                | Low                                       | Low                 | Low                            | Low                                     | <b>Low</b>      |
| <b>2021; Rita</b>        | Moderate           | Low                              | Low                                | Low                                       | Low                 | Low                            | Low                                     | <b>Moderate</b> |
| <b>2021; Wiley</b>       | Low                | Low                              | Low                                | Low                                       | Low                 | Low                            | Low                                     | <b>Low</b>      |
| <b>2021; Belyaev</b>     | Moderate           | Low                              | Low                                | Low                                       | Low                 | Low                            | Low                                     | <b>Moderate</b> |
| <b>2021; Park</b>        | Low                | Low                              | Low                                | Low                                       | NI                  | Low                            | Low                                     | <b>Low</b>      |
| <b>2020; Arya</b>        | Low                | Low                              | Low                                | Low                                       | Low                 | Low                            | Low                                     | <b>Low</b>      |
| <b>2020; Arhuidese</b>   | Low                | Low                              | Low                                | Low                                       | Low                 | Low                            | Low                                     | <b>Low</b>      |
| <b>2020; Copeland</b>    | Low                | Low                              | Low                                | Low                                       | Low                 | Low                            | Low                                     | <b>Low</b>      |
| <b>2020; Krishnasamy</b> | Low                | Low                              | Low                                | Low                                       | NI                  | Low                            | Low                                     | <b>Low</b>      |
| <b>2020; Yolgosteren</b> | Moderate           | Low                              | Low                                | Low                                       | NI                  | Low                            | Low                                     | <b>Moderate</b> |
| <b>2020; Ku</b>          | Low                | Low                              | Low                                | Low                                       | Low                 | Low                            | Low                                     | <b>Low</b>      |
| <b>2020; Hayat</b>       | Low                | Low                              | Low                                | Low                                       | Low                 | Low                            | Low                                     | <b>Low</b>      |
| <b>2020; Vogel</b>       | Low                | Low                              | Low                                | Low                                       | Low                 | Low                            | Low                                     | <b>Low</b>      |
| <b>2020; Shen</b>        | Low                | Low                              | Low                                | Low                                       | Low                 | Low                            | Low                                     | <b>Low</b>      |
| <b>2020; Melk</b>        | Moderate           | Low                              | Low                                | Low                                       | NI                  | Low                            | Low                                     | <b>Moderate</b> |

|                                |          |          |          |     |     |     |     |                 |
|--------------------------------|----------|----------|----------|-----|-----|-----|-----|-----------------|
| <b>2020; Park</b>              | Low      | Low      | Moderate | Low | Low | Low | Low | <b>Moderate</b> |
| <b>2020; Pruthi</b>            | Low      | Low      | Low      | Low | Low | Low | Low | <b>Low</b>      |
| <b>2020; Murphy</b>            | Low      | Low      | Low      | Low | Low | Low | Low | <b>Low</b>      |
| <b>2020; Ng</b>                | Low      | Low      | Low      | Low | Low | Low | Low | <b>Low</b>      |
| <b>2019; Nee</b>               | Low      | Low      | Low      | Low | Low | Low | Low | <b>Low</b>      |
| <b>2019; Howson</b>            | Low      | Low      | Low      | Low | Low | Low | Low | <b>Low</b>      |
| <b>2019; King</b>              | Low      | Low      | Low      | Low | NI  | Low | Low | <b>Low</b>      |
| <b>2019; Myaskovsky</b>        | Low      | Low      | Low      | Low | Low | Low | Low | <b>Low</b>      |
| <b>2019; Ke</b>                | Low      | Low      | Low      | Low | Low | Low | Low | <b>Low</b>      |
| <b>2019; Naylor</b>            | Low      | Low      | Moderate | Low | Low | Low | Low | <b>Moderate</b> |
| <b>2018; Shah</b>              | Low      | Low      | Low      | Low | Low | Low | Low | <b>Low</b>      |
| <b>2018; Huria</b>             | Low      | Low      | Low      | Low | Low | Low | Low | <b>Low</b>      |
| <b>2018; Lin</b>               | Low      | Moderate | Low      | Low | Low | Low | Low | <b>Moderate</b> |
| <b>2018; Krishnasamy</b>       | Low      | Low      | Low      | Low | Low | Low | Low | <b>Low</b>      |
| <b>2018; Keddis</b>            | Low      | Moderate | Low      | Low | Low | Low | Low | <b>Moderate</b> |
| <b>2018; Williams</b>          | Moderate | Low      | Low      | Low | Low | Low | Low | <b>Moderate</b> |
| <b>2018; Sypek</b>             | Low      | Low      | Low      | Low | Low | Low | Low | <b>Low</b>      |
| <b>2018; Liu</b>               | Low      | Low      | Low      | Low | Low | Low | Low | <b>Low</b>      |
| <b>2018; Chatelet</b>          | Low      | Low      | Low      | Low | Low | Low | Low | <b>Low</b>      |
| <b>2018<sup>a</sup>; Zhang</b> | Low      | Low      | Low      | Low | NI  | Low | Low | <b>Low</b>      |
| <b>2018<sup>b</sup>; Zhang</b> | Low      | Low      | Low      | Low | NI  | Low | Low | <b>Low</b>      |
| <b>2018; Peng</b>              | Low      | Low      | Low      | Low | Low | Low | Low | <b>Low</b>      |
| <b>2018; Purnell</b>           | Low      | Low      | Low      | Low | NI  | Low | Low | <b>Low</b>      |
| <b>2017; Trivedi</b>           | Low      | Low      | Low      | Low | Low | Low | Low | <b>Low</b>      |
| <b>2017; McGill</b>            | Low      | Low      | Low      | Low | Low | Low | Low | <b>Low</b>      |
| <b>2017; McKercher</b>         | Low      | Low      | Low      | Low | Low | Low | Low | <b>Low</b>      |
| <b>2017; Pisoni</b>            | Low      | Low      | Low      | Low | NI  | Low | Low | <b>Low</b>      |
| <b>2017; Wilmink</b>           | Moderate | Low      | Low      | Low | NI  | Low | Low | <b>Moderate</b> |
| <b>2017; Gulcan</b>            | Moderate | Moderate | Low      | Low | Low | Low | Low | <b>Moderate</b> |
| <b>2017; Kim</b>               | Low      | Low      | Low      | Low | Low | Low | Low | <b>Low</b>      |
| <b>2017; Chan</b>              | Low      | Low      | Low      | Low | Low | Low | Low | <b>Low</b>      |
| <b>2017; Wallace</b>           | Moderate | Low      | Moderate | Low | Low | Low | Low | <b>Moderate</b> |

|                                  |          |          |          |     |     |     |     |                 |
|----------------------------------|----------|----------|----------|-----|-----|-----|-----|-----------------|
| <b>2017; Trinh</b>               | Low      | Low      | Low      | Low | NI  | Low | Low | <b>Low</b>      |
| <b>2017; Imanishi</b>            | Low      | Low      | Low      | Low | NI  | Low | Low | <b>Low</b>      |
| <b>2017; Gill</b>                | Low      | Low      | Low      | Low | Low | Low | Low | <b>Low</b>      |
| <b>2017; Zhang</b>               | Low      | Low      | Low      | Low | NI  | Low | Low | <b>Low</b>      |
| <b>2017; Choi</b>                | Low      | Low      | Low      | Low | Low | Low | Low | <b>Low</b>      |
| <b>2017; Taber</b>               | Low      | Low      | Low      | Low | Low | Low | Low | <b>Low</b>      |
| <b>2016; Tamayo Isla</b>         | Serious  | Low      | Low      | Low | NI  | Low | Low | <b>Serious</b>  |
| <b>2016; Liu</b>                 | Low      | Low      | Low      | Low | Low | Low | Low | <b>Low</b>      |
| <b>2016; Shabankhani</b>         | Moderate | Moderate | Low      | Low | Low | Low | Low | <b>Moderate</b> |
| <b>2016; Mucsi</b>               | Low      | Low      | Low      | Low | Low | Low | Low | <b>Low</b>      |
| <b>2016; Kihal-Talantikite</b>   | Low      | Moderate | Moderate | Low | Low | Low | Low | <b>Moderate</b> |
| <b>2016; Molmenti</b>            | Low      | Moderate | Low      | Low | NI  | Low | Low | <b>Moderate</b> |
| <b>2015; Nee</b>                 | Low      | Low      | Low      | Low | NI  | Low | Low | <b>Low</b>      |
| <b>2015; Lawton</b>              | Low      | Low      | Low      | Low | NI  | Low | Low | <b>Low</b>      |
| <b>2015; van den Beukel</b>      | Low      | Low      | Low      | Low | Low | Low | Low | <b>Low</b>      |
| <b>2015; Park</b>                | Serious  | Low      | Low      | Low | NI  | Low | Low | <b>Serious</b>  |
| <b>2015; Wang</b>                | Moderate | Moderate | Low      | Low | Low | Low | Low | <b>Moderate</b> |
| <b>2015; Ward</b>                | Low      | Low      | Low      | Low | Low | Low | Low | <b>Low</b>      |
| <b>2015; Ilori</b>               | Low      | Low      | Low      | Low | Low | Low | Low | <b>Low</b>      |
| <b>2015; Matsuoka</b>            | Low      | Moderate | Low      | Low | Low | Low | Low | <b>Moderate</b> |
| <b>2015; Ward</b>                | Low      | Low      | Low      | Low | Low | Low | Low | <b>Low</b>      |
| <b>2015; Arce</b>                | Low      | Low      | Low      | Low | Low | Low | Low | <b>Low</b>      |
| <b>2014; Goldfarb-Rumyantzev</b> | Low      | Low      | Low      | Low | NI  | Low | Low | <b>Low</b>      |
| <b>2014; Cole</b>                | Low      | Low      | Low      | Low | NI  | Low | Low | <b>Low</b>      |
| <b>2014; Burrows</b>             | Low      | Low      | Low      | Low | Low | Low | Low | <b>Low</b>      |
| <b>2014; Prasad</b>              | Serious  | Low      | Low      | Low | NI  | Low | Low | <b>Serious</b>  |
| <b>2014; Grace</b>               | Moderate | Low      | Low      | Low | Low | Low | Low | <b>Moderate</b> |
| <b>2014; Kim</b>                 | Serious  | Low      | Low      | Low | Low | Low | Low | <b>Serious</b>  |
| <b>2014; Yang</b>                | Low      | Low      | Low      | Low | Low | Low | Low | <b>Low</b>      |

|                                  |          |          |          |     |     |     |     |                 |
|----------------------------------|----------|----------|----------|-----|-----|-----|-----|-----------------|
| <b>2014; de Moraes</b>           | Low      | Low      | Low      | Low | NI  | Low | Low | <b>Low</b>      |
| <b>2014; Texeira</b>             | Low      | Moderate | Low      | Low | Low | Low | Low | <b>Moderate</b> |
| <b>2013; Yan</b>                 | Low      | Low      | Low      | Low | Low | Low | Low | <b>Low</b>      |
| <b>2013; Chang</b>               | Moderate | Low      | Low      | Low | NI  | Low | Low | <b>Moderate</b> |
| <b>2013; Ros</b>                 | Low      | Low      | Low      | Low | Low | Low | Low | <b>Low</b>      |
| <b>2013; Fernadez</b>            | Low      | Low      | Moderate | Low | Low | Low | Low | <b>Moderate</b> |
| <b>2013; Kimmel</b>              | Low      | Low      | Low      | Low | Low | Low | Low | <b>Low</b>      |
| <b>2013; Arce</b>                | Low      | Low      | Low      | Low | NI  | Low | Low | <b>Low</b>      |
| <b>2013; Purnell</b>             | Low      | Low      | Low      | Low | Low | Low | Low | <b>Low</b>      |
| <b>2013; Waterman</b>            | Low      | Moderate | Low      | Low | Low | Low | Low | <b>Moderate</b> |
| <b>2013; PromisLow</b>           | Low      | Low      | Low      | Low | Low | Low | Low | <b>Low</b>      |
| <b>2012; Sood</b>                | Moderate | Low      | Moderate | Low | Low | Low | Low | <b>Moderate</b> |
| <b>2012; Woo</b>                 | Moderate | Low      | Low      | Low | NI  | Low | Low | <b>Moderate</b> |
| <b>2012; van den Beukel</b>      | Low      | Low      | Low      | Low | Low | Low | Low | <b>Low</b>      |
| <b>2012; Marinovich</b>          | Low      | Low      | Low      | Low | NI  | Low | Low | <b>Low</b>      |
| <b>2012; Xu</b>                  | Low      | Low      | Low      | Low | NI  | Low | Low | <b>Low</b>      |
| <b>2012; Huang</b>               | Low      | Low      | Low      | Low | Low | Low | Low | <b>Low</b>      |
| <b>2012; Lockridge</b>           | Moderate | Low      | Low      | Low | Low | Low | Low | <b>Moderate</b> |
| <b>2012; Neri</b>                | Low      | Moderate | Low      | Low | Low | Low | Low | <b>Moderate</b> |
| <b>2012; Couchoud</b>            | Low      | Low      | Low      | Low | Low | Low | Low | <b>Low</b>      |
| <b>2012; Goldfarb-Rumyantzev</b> | Low      | Low      | Low      | Low | NI  | Low | Low | <b>Low</b>      |
| <b>2012; Udayaraj</b>            | Low      | Low      | Moderate | Low | Low | Low | Low | <b>Moderate</b> |
| <b>2012; Patzer</b>              | Low      | Low      | Moderate | Low | Low | Low | Low | <b>Moderate</b> |
| <b>2012; Garg</b>                | Moderate | Low      | Low      | Low | Low | Low | Low | <b>Moderate</b> |
| <b>2011; Lopez-Vargas</b>        | Low      | Low      | Low      | Low | NI  | Low | Low | <b>Low</b>      |
| <b>2011; Carrero</b>             | Moderate | Low      | Low      | Low | Low | Low | Low | <b>Moderate</b> |
| <b>2011; Chidambaram</b>         | Low      | Low      | Low      | Low | Low | Low | Low | <b>Low</b>      |
| <b>2011; Bastos</b>              | Low      | Low      | Low      | Low | Low | Low | Low | <b>Low</b>      |
| <b>2011; Machado</b>             | Low      | Low      | Low      | Low | Low | Low | Low | <b>Low</b>      |

|                         |          |          |          |     |     |     |     |                 |
|-------------------------|----------|----------|----------|-----|-----|-----|-----|-----------------|
| <b>2011; Hall</b>       | Low      | Low      | Low      | Low | NI  | Low | Low | <b>Low</b>      |
| <b>2010; Chung</b>      | Moderate | Low      | Low      | Low | NI  | Low | Low | <b>Moderate</b> |
| <b>2010; Huang</b>      | Moderate | Moderate | Low      | Low | Low | Low | Low | <b>Moderate</b> |
| <b>2010; Sood</b>       | Low      | Low      | Low      | Low | Low | Low | Low | <b>Low</b>      |
| <b>2010; Sandhu</b>     | Low      | Low      | Low      | Low | NI  | Low | Low | <b>Low</b>      |
| <b>2010; Udayaraj</b>   | Low      | Low      | Moderate | Low | Low | Low | Low | <b>Moderate</b> |
| <b>2010; Ng</b>         | Moderate | Low      | Low      | Low | Low | Low | Low | <b>Moderate</b> |
| <b>2010; Ramanan</b>    | Moderate | Low      | Low      | Low | Low | Low | Low | <b>Moderate</b> |
| <b>2009; Roderick</b>   | Low      | Low      | Low      | Low | Low | Low | Low | <b>Low</b>      |
| <b>2009; de Mutsert</b> | Serious  | Low      | Low      | Low | Low | Low | Low | <b>Serious</b>  |
| <b>2009; Eisenstein</b> | Low      | Low      | Low      | Low | Low | Low | Low | <b>Low</b>      |
| <b>2009; Yeates</b>     | Low      | Low      | Low      | Low | Low | Low | Low | <b>Low</b>      |
| <b>2009; Feyssa</b>     | Serious  | Low      | Low      | Low | Low | Low | Low | <b>Serious</b>  |
| <b>2009; Patzer</b>     | Low      | Low      | Moderate | Low | Low | Low | Low | <b>Moderate</b> |
| <b>2008; Wolf</b>       | Low      | Low      | Low      | Low | Low | Low | Low | <b>Low</b>      |
| <b>2008; Sanabria</b>   | Low      | Low      | Low      | Low | Low | Low | Low | <b>Low</b>      |
| <b>2008; Hall</b>       | Low      | Low      | Moderate | Low | Low | Low | Low | <b>Moderate</b> |
| <b>2008; Schaeffner</b> | Low      | Low      | Low      | Low | Low | Low | Low | <b>Low</b>      |
| <b>2007; Gill</b>       | Low      | Low      | Low      | Low | NI  | Low | Low | <b>Low</b>      |
| <b>2006; Robinson</b>   | Low      | Low      | Low      | Low | Low | Low | Low | <b>Low</b>      |
| <b>2006; Caskey</b>     | Low      | Low      | Low      | Low | Low | Low | Low | <b>Low</b>      |
| <b>2006; Hemmelgarn</b> | Low      | Low      | Low      | Low | Low | Low | Low | <b>Low</b>      |
| <b>2006; Bayat</b>      | Low      | Low      | Low      | Low | Low | Low | Low | <b>Low</b>      |
| <b>2005; Chung</b>      | Moderate | Low      | Low      | Low | NI  | Low | Low | <b>Moderate</b> |
| <b>2005; Mircescu</b>   | Low      | Low      | Low      | Low | Low | Low | Low | <b>Low</b>      |
| <b>2005; Kutner</b>     | Serious  | Low      | Low      | Low | Low | Low | Low | <b>Serious</b>  |
| <b>2005; Press</b>      | Moderate | Low      | Low      | Low | Low | Low | Low | <b>Moderate</b> |
| <b>2005; Pallet</b>     | Moderate | Low      | Low      | Low | Low | Low | Low | <b>Moderate</b> |
| <b>2005; Chakker</b>    | Low      | Low      | Low      | Low | Low | Low | Low | <b>Low</b>      |
| <b>2004; Prasad</b>     | Moderate | Low      | Low      | Low | NI  | Low | Low | <b>Moderate</b> |
| <b>2004; Jager</b>      | Moderate | Low      | Low      | Low | Low | Low | Low | <b>Moderate</b> |
| <b>2004; Yeates</b>     | Low      | Low      | Low      | Low | Low | Low | Low | <b>Low</b>      |

|                              |          |          |     |     |     |     |     |                 |
|------------------------------|----------|----------|-----|-----|-----|-----|-----|-----------------|
| <b>2004; Sequist</b>         | Low      | Low      | Low | Low | Low | Low | Low | <b>Low</b>      |
| <b>2004; Villar</b>          | Low      | Low      | Low | Low | Low | Low | Low | <b>Low</b>      |
| <b>2003; Wang</b>            | Serious  | Low      | Low | Low | NI  | Low | Low | <b>Serious</b>  |
| <b>2003; Cass</b>            | Moderate | Low      | Low | Low | NI  | Low | Low | <b>Moderate</b> |
| <b>2003; Oniscu</b>          | Low      | Low      | Low | Low | Low | Low | Low | <b>Low</b>      |
| <b>2002; Reddan</b>          | Moderate | Low      | Low | Low | NI  | Low | Low | <b>Moderate</b> |
| <b>2002; Pisoni</b>          | Low      | Low      | Low | Low | NI  | Low | Low | <b>Low</b>      |
| <b>2002; Iseki</b>           | Moderate | Low      | Low | Low | NI  | Low | Low | <b>Moderate</b> |
| <b>2002; Stack</b>           | Low      | Low      | Low | Low | Low | Low | Low | <b>Low</b>      |
| <b>2001; Winkelmayr</b>      | Moderate | Low      | Low | Low | NI  | Low | Low | <b>Moderate</b> |
| <b>2000; Stehman-Breen</b>   | Low      | Low      | Low | Low | NI  | Low | Low | <b>Low</b>      |
| <b>2000; Allon</b>           | Low      | Low      | Low | Low | NI  | Low | Low | <b>Low</b>      |
| <b>2000; Schaubel</b>        | Low      | Low      | Low | Low | Low | Low | Low | <b>Low</b>      |
| <b>2000; Garg</b>            | Low      | Low      | Low | Low | NI  | Low | Low | <b>Low</b>      |
| <b>1999; Chandna</b>         | Low      | Moderate | Low | Low | NI  | Low | Low | <b>Moderate</b> |
| <b>1996; Bleyer</b>          | Moderate | Low      | Low | Low | NI  | Low | Low | <b>Moderate</b> |
| <b>1996; Medina</b>          | Moderate | Moderate | Low | Low | NI  | Low | Low | <b>Moderate</b> |
| <b>1995; Barker-Cummings</b> | Moderate | Low      | Low | Low | NI  | Low | Low | <b>Moderate</b> |
| <b>1994; Cowie</b>           | Moderate | Low      | Low | Low | NI  | Low | Low | <b>Moderate</b> |
| <b>1994; Puqh</b>            | Low      | Low      | Low | Low | Low | Low | Low | <b>Low</b>      |
| <b>1992; Soucie</b>          | Moderate | Low      | Low | Low | Low | Low | Low | <b>Moderate</b> |

NI: no information



## Supplementary S5: Forest plots

### 5.1. Arteriovenous fistula/graft vs. Central venous catheter

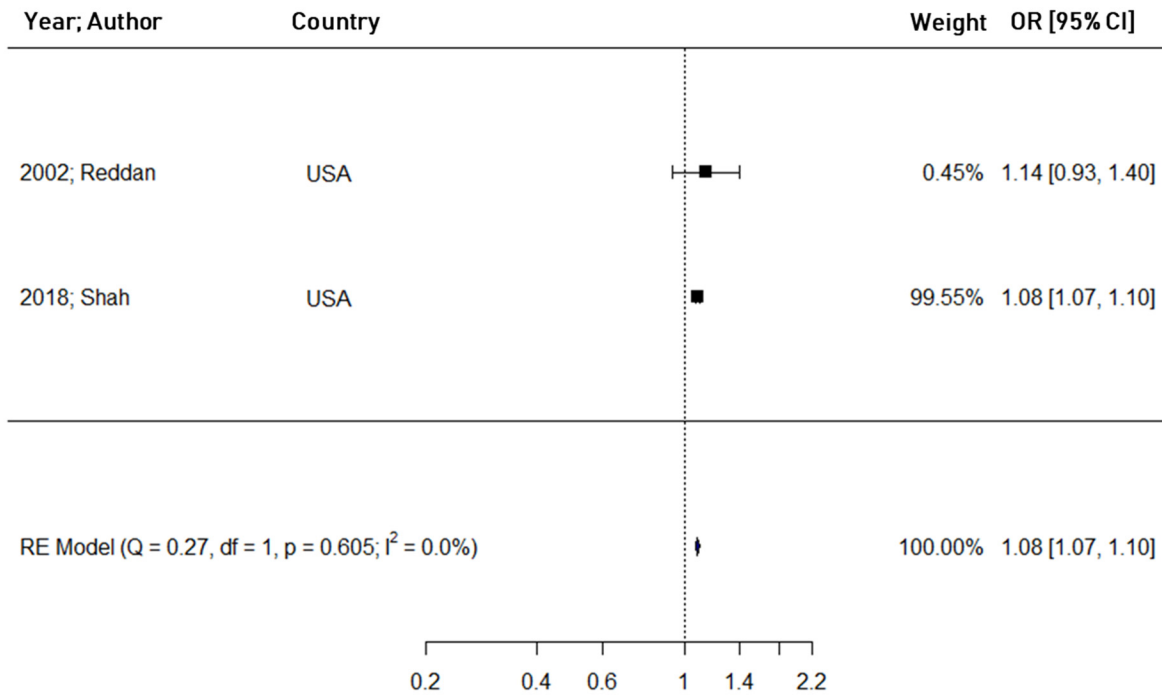

**Suppl. Figure S1.** Forest plot comparing Black and White patients (reference) regarding dialysis initiation with arteriovenous fistula or graft.

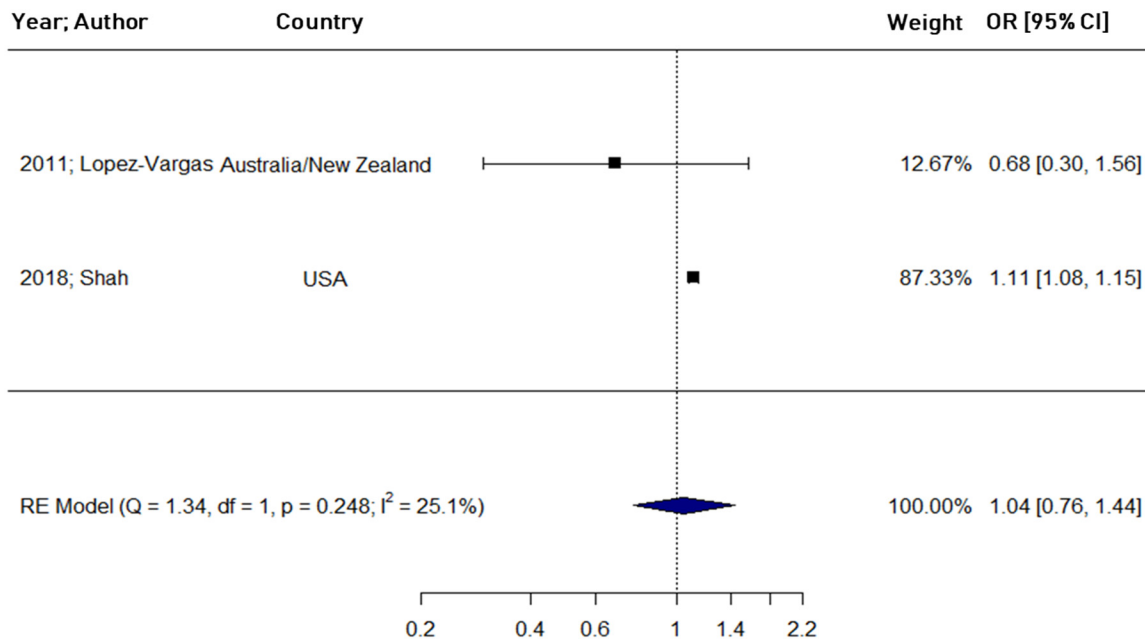

**Suppl. Figure S2.** Forest plot comparing Asian and White patients (reference) regarding dialysis initiation with arteriovenous fistula or graft.

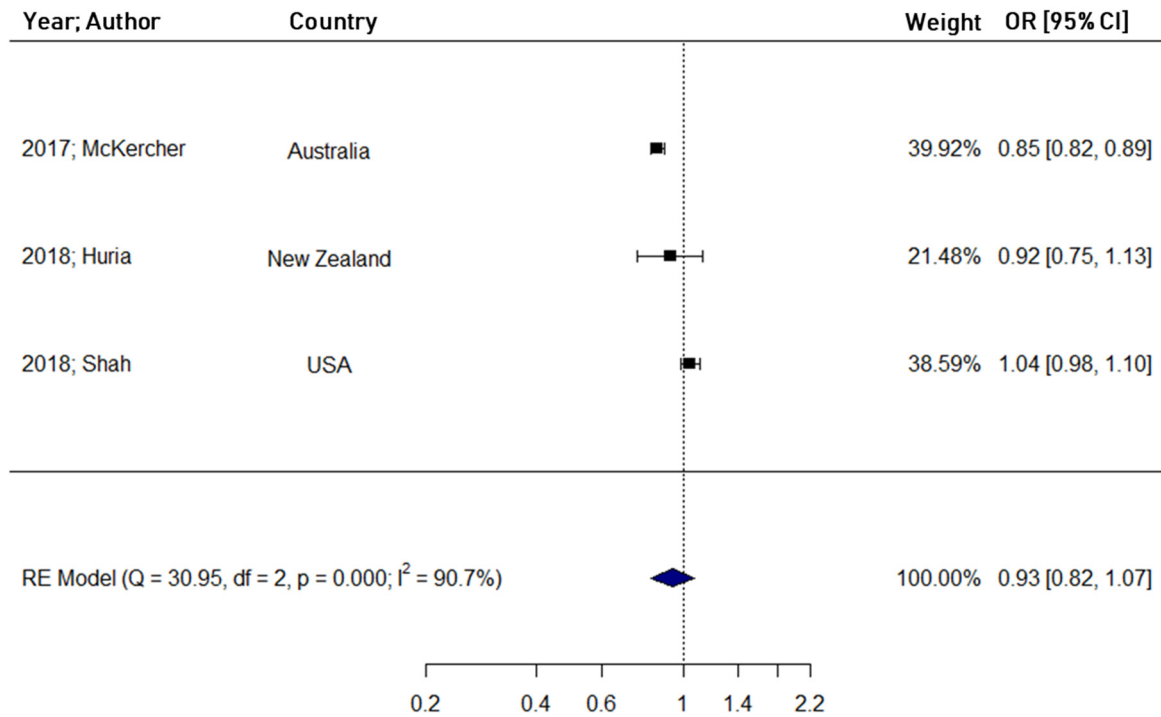

**Suppl. Figure S3.** Forest plot comparing Indigenous and White patients (reference) regarding dialysis initiation with arteriovenous fistula or graft.

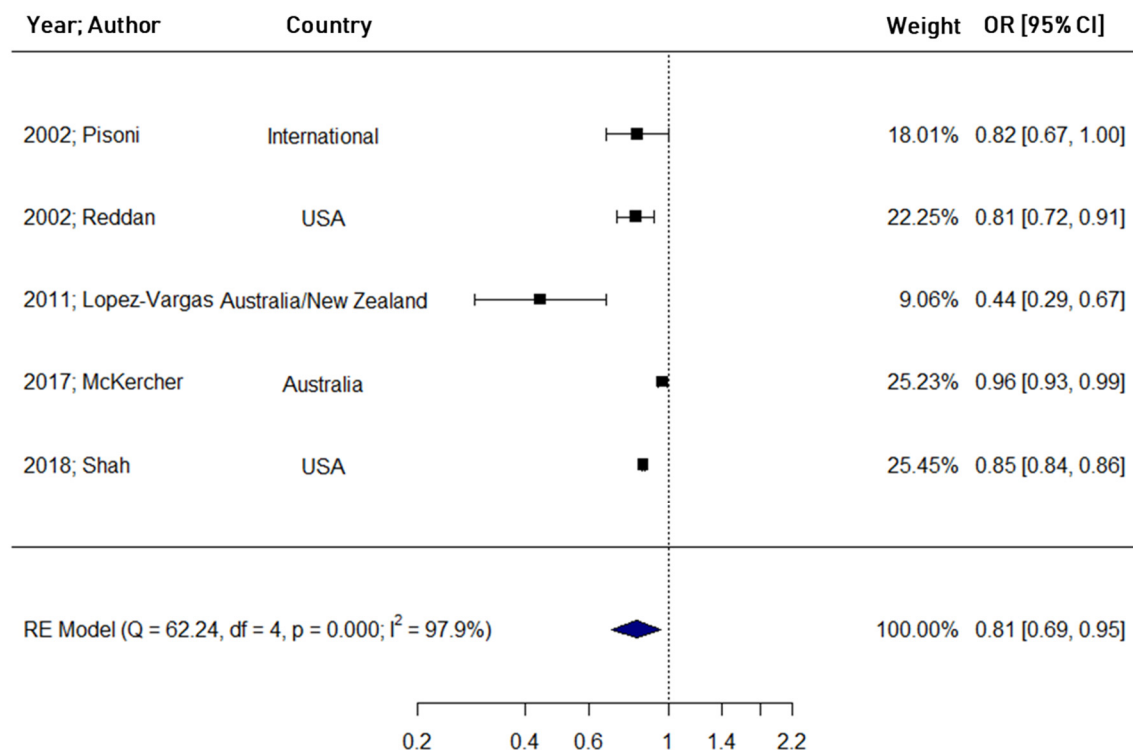

**Suppl. Figure S4.** Forest plot comparing female and male patients (reference) regarding dialysis initiation with arteriovenous fistula or graft.

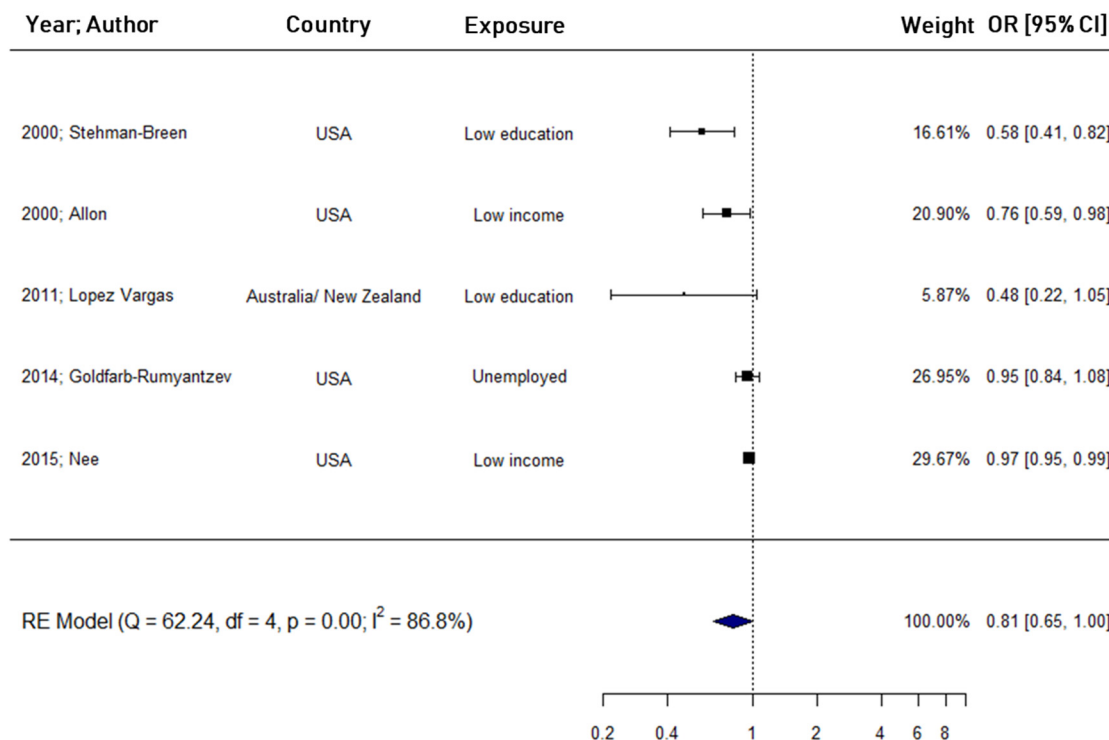

**Suppl. Figure S5.** Forest plot comparing low and high socioeconomic status patients (reference) regarding dialysis initiation with arteriovenous fistula or graft.

## 5.2. Arteriovenous fistula vs. Arteriovenous graft

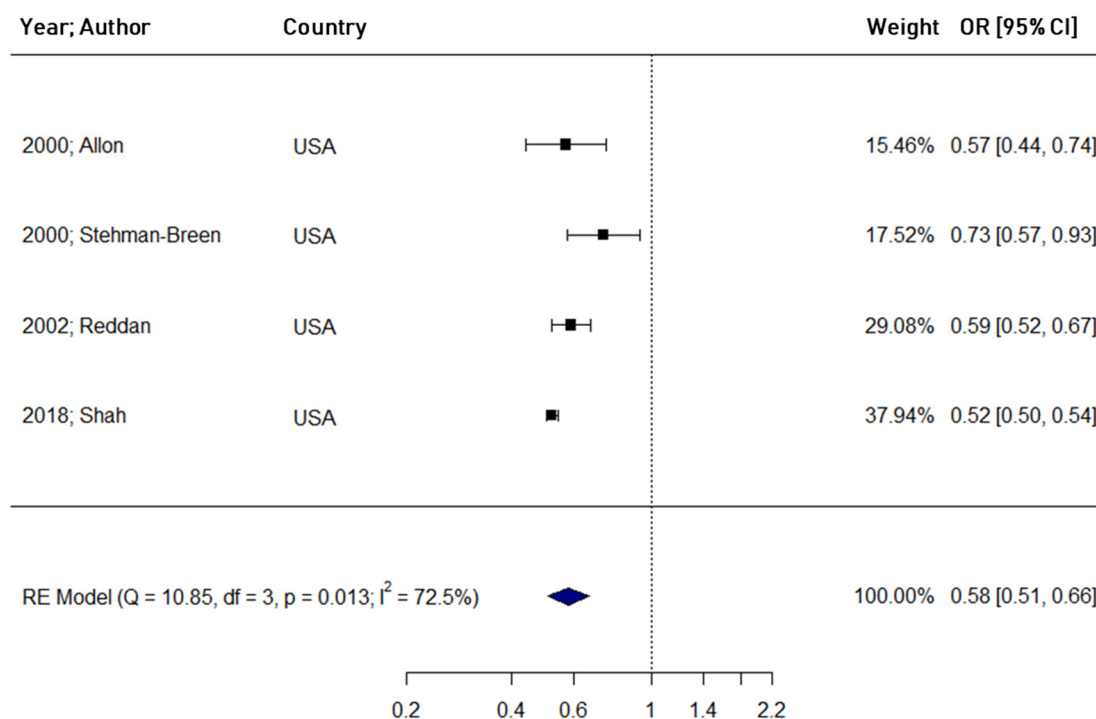

**Suppl. Figure S6.** Forest plot comparing Black and White patients (reference) regarding dialysis initiation with arteriovenous fistula vs. arteriovenous graft.

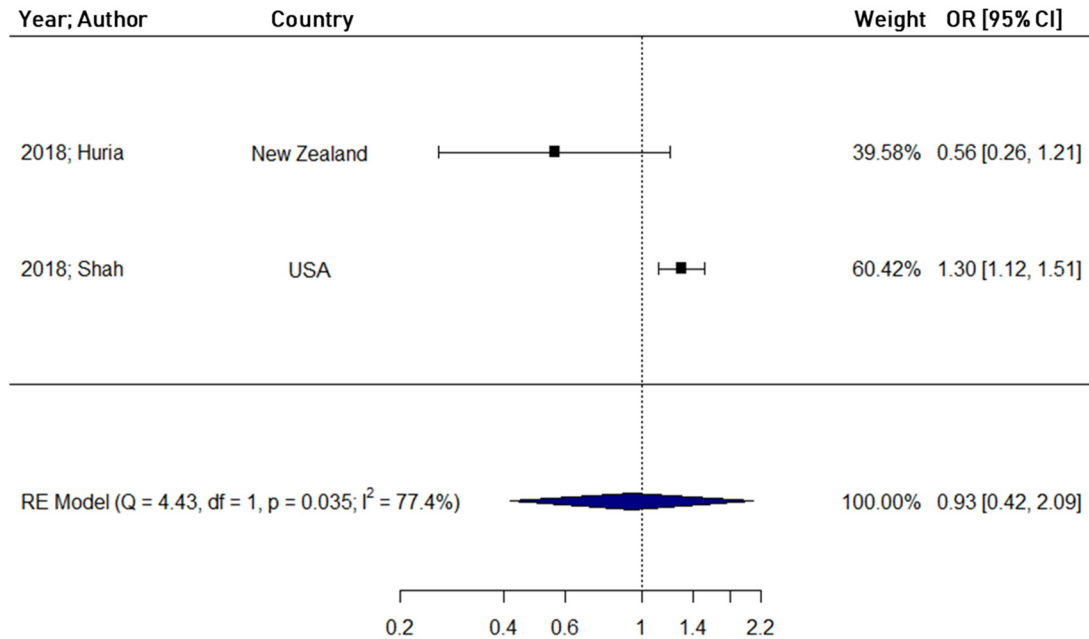

**Suppl. Figure S7.** Forest plot comparing Indigenous and White patients (reference) regarding dialysis initiation with arteriovenous fistula vs. arteriovenous graft.

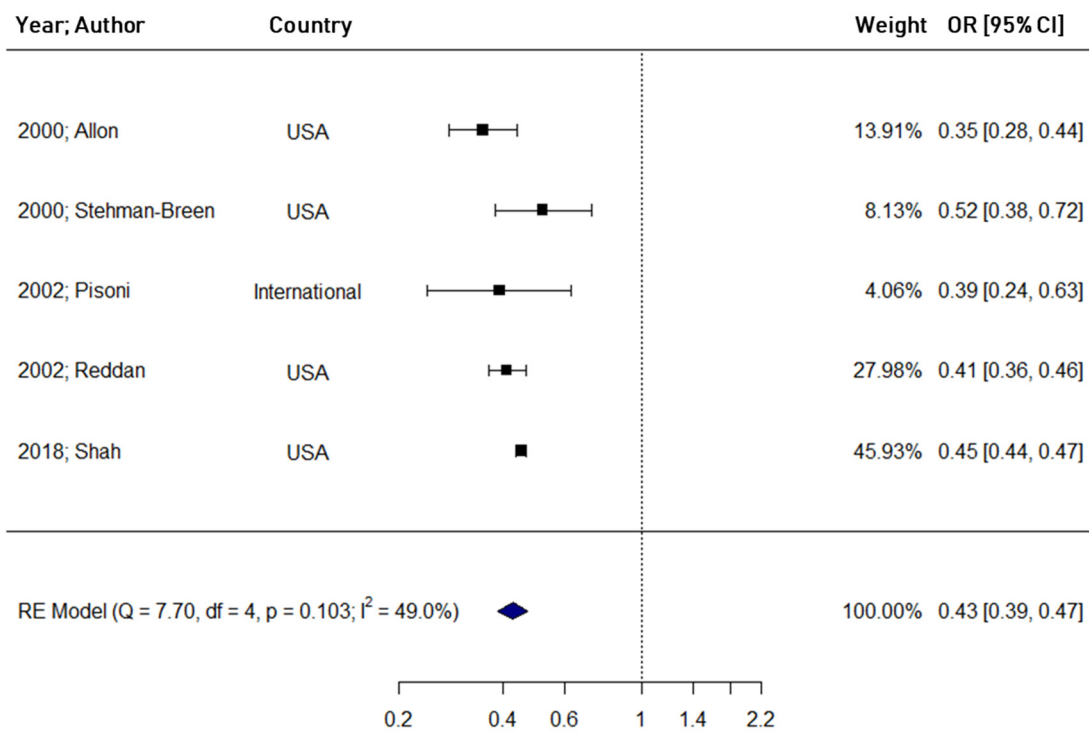

**Suppl. Figure S8.** Forest plot comparing female and male patients (reference) regarding dialysis initiation with arteriovenous fistula vs. arteriovenous graft.

### 5.3. Successful arteriovenous fistula use

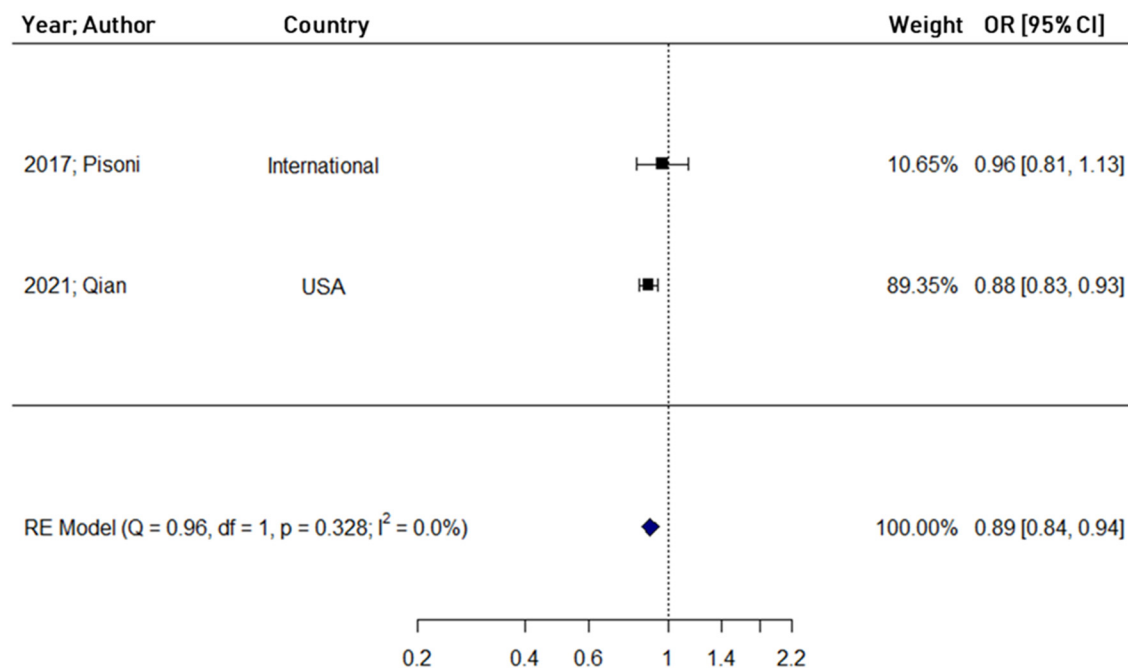

**Suppl. Figure S9.** Forest plot comparing Black and White patients (reference) regarding successful arteriovenous fistula use.

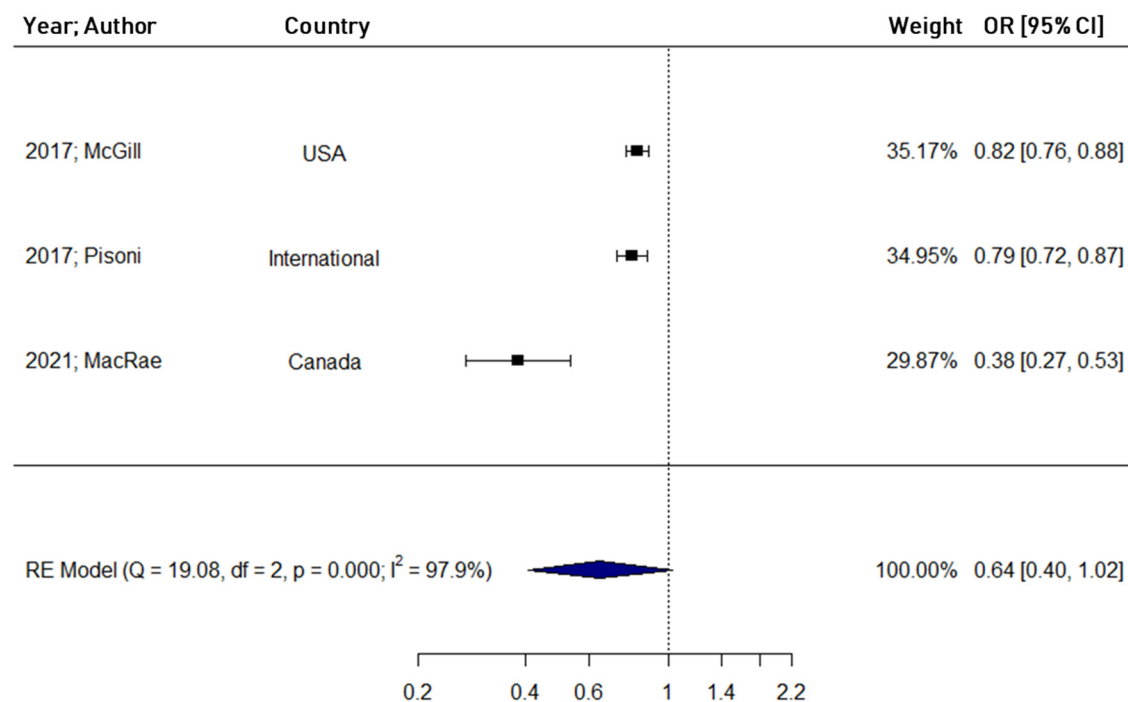

**Suppl. Figure S10.** Forest plot comparing female and male patients (reference) regarding successful arteriovenous fistula.

#### 5.4. Primary arteriovenous fistula patency

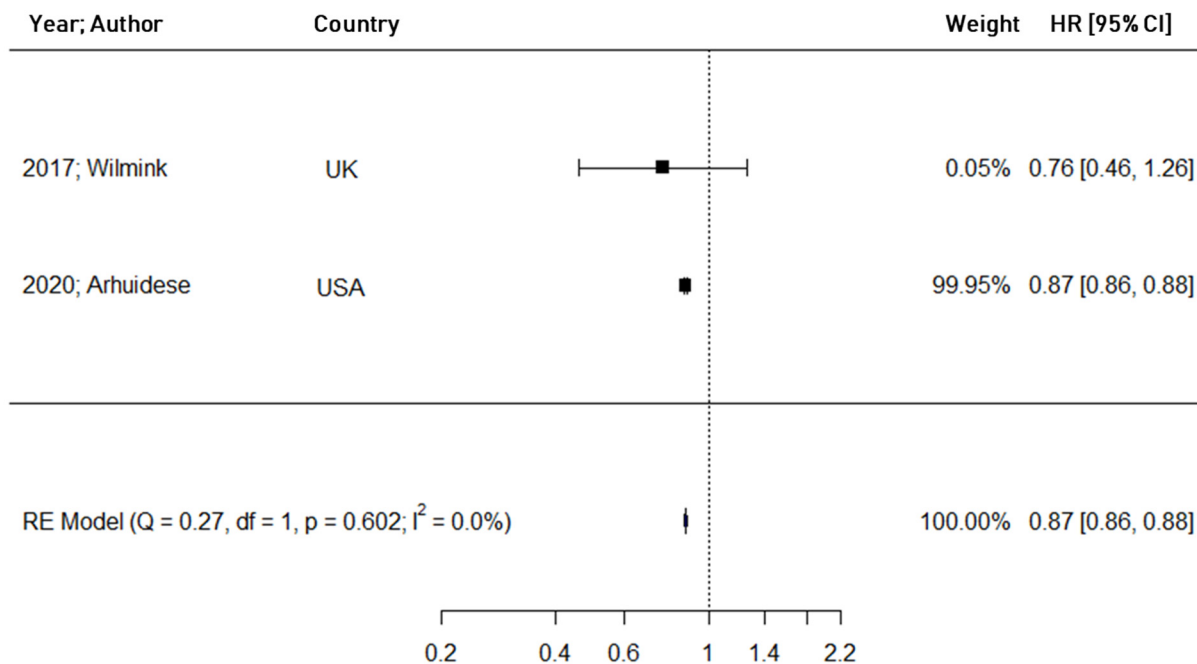

**Suppl. Figure S11.** Forest plot comparing Black and White patients (reference) regarding primary arteriovenous fistula patency.

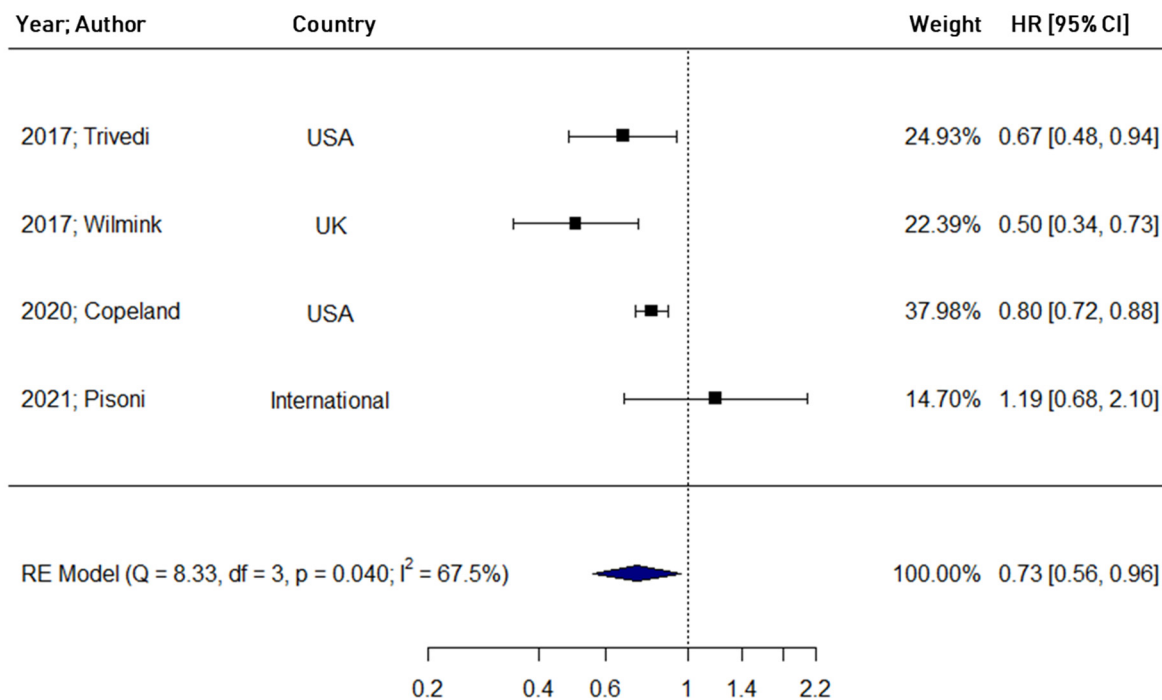

**Suppl. Figure S12.** Forest plot comparing female and male patients (reference) regarding primary arteriovenous fistula patency.

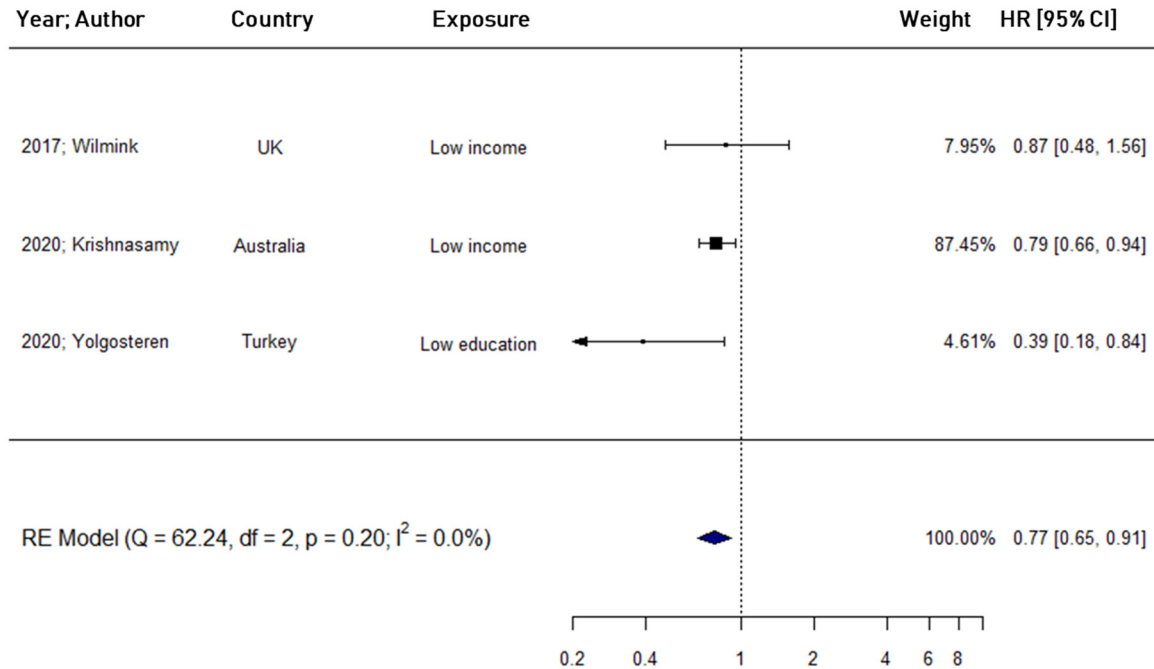

**Suppl. Figure S13.** Forest plot comparing low and high socioeconomic status patients (reference) regarding primary arteriovenous fistula patency.

### 5.5. Transition from central venous catheter to arteriovenous fistula/graft

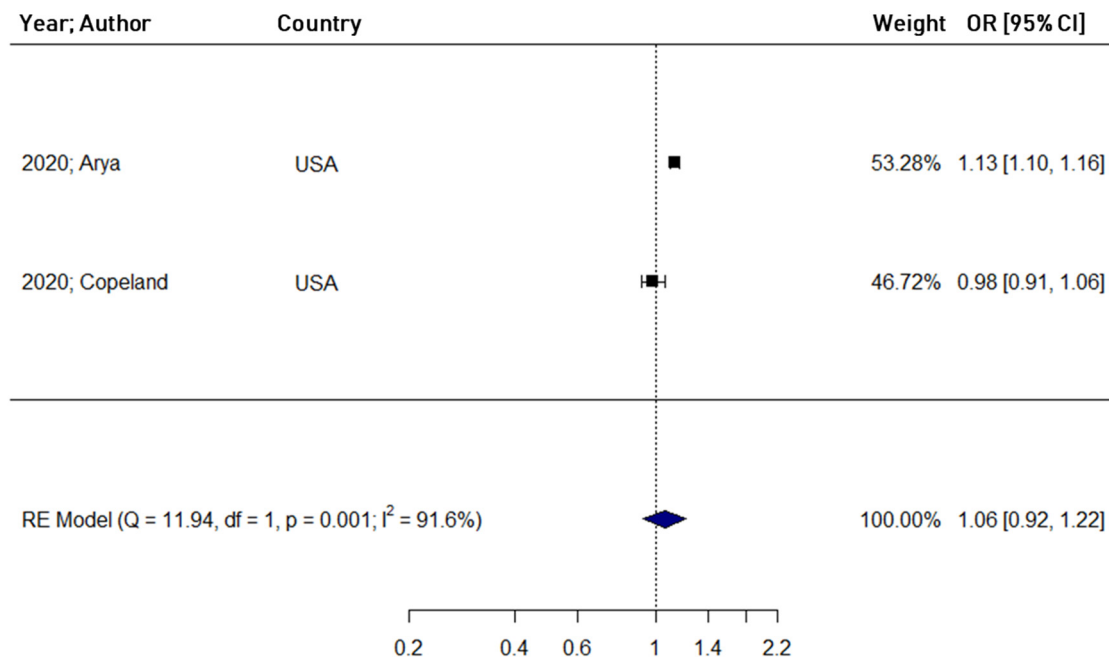

**Suppl. Figure S14.** Forest plot comparing Black and White patients (reference) regarding the transition from central venous catheter to arteriovenous fistula/graft.

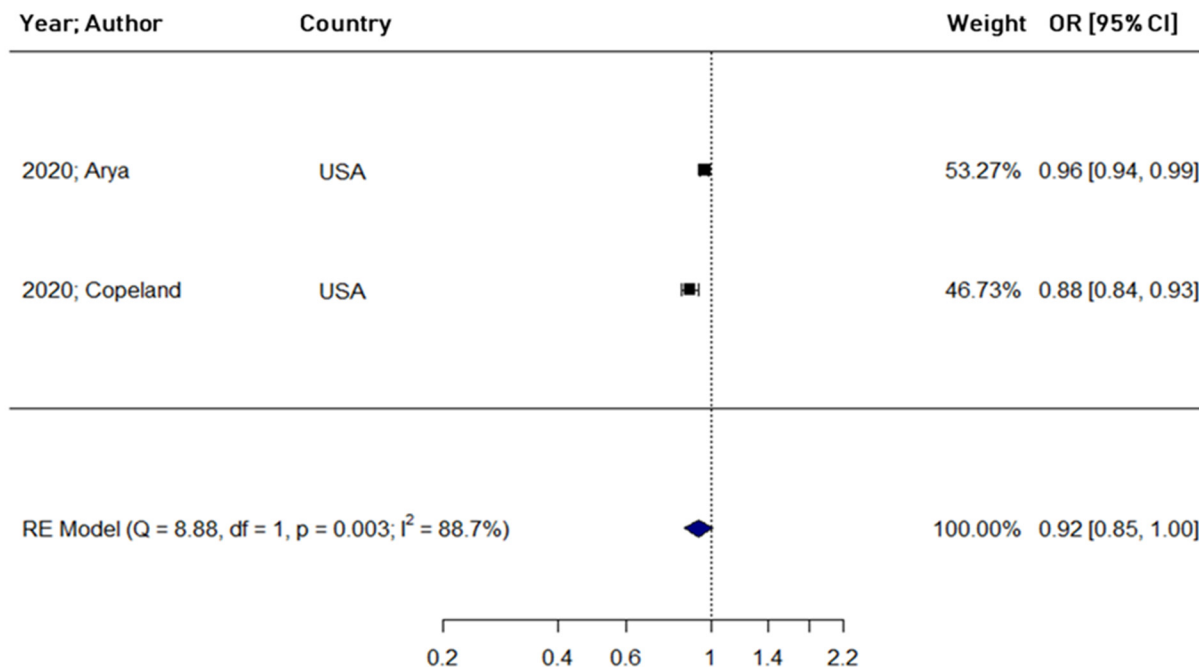

**Suppl. Figure S15.** Forest plot comparing female and male patients (reference) regarding the transition from central venous catheter to arteriovenous fistula/graft.

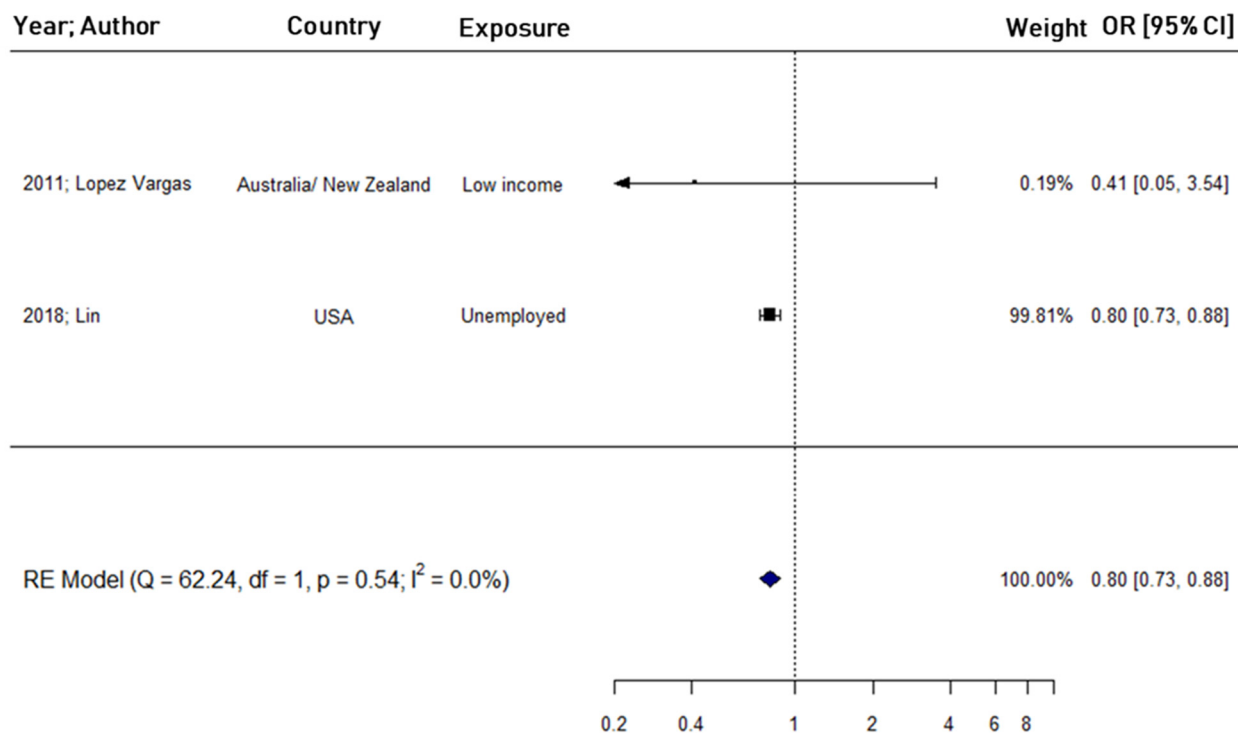

**Suppl. Figure S16.** Forest plot comparing low and high socioeconomic status patients (reference) the transition from central venous catheter to arteriovenous fistula/graft.



## 5.6. Home dialysis

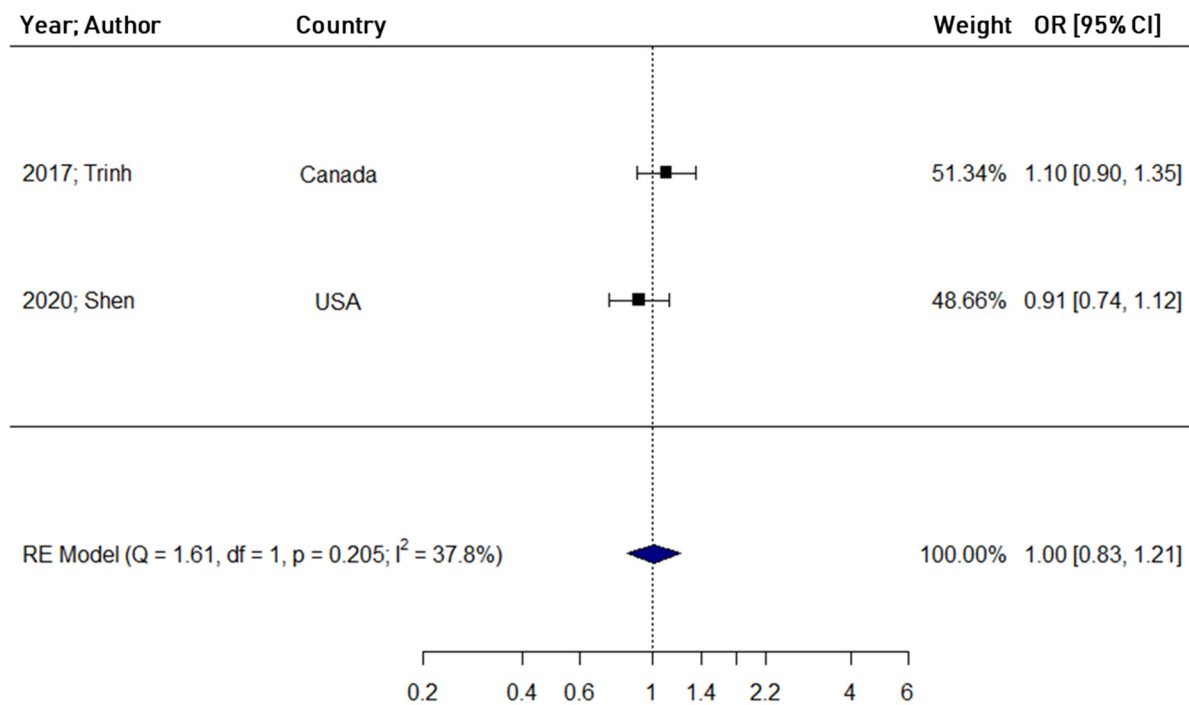

**Suppl. Figure S17.** Forest plot comparing Black and White patients (reference) regarding home dialysis.

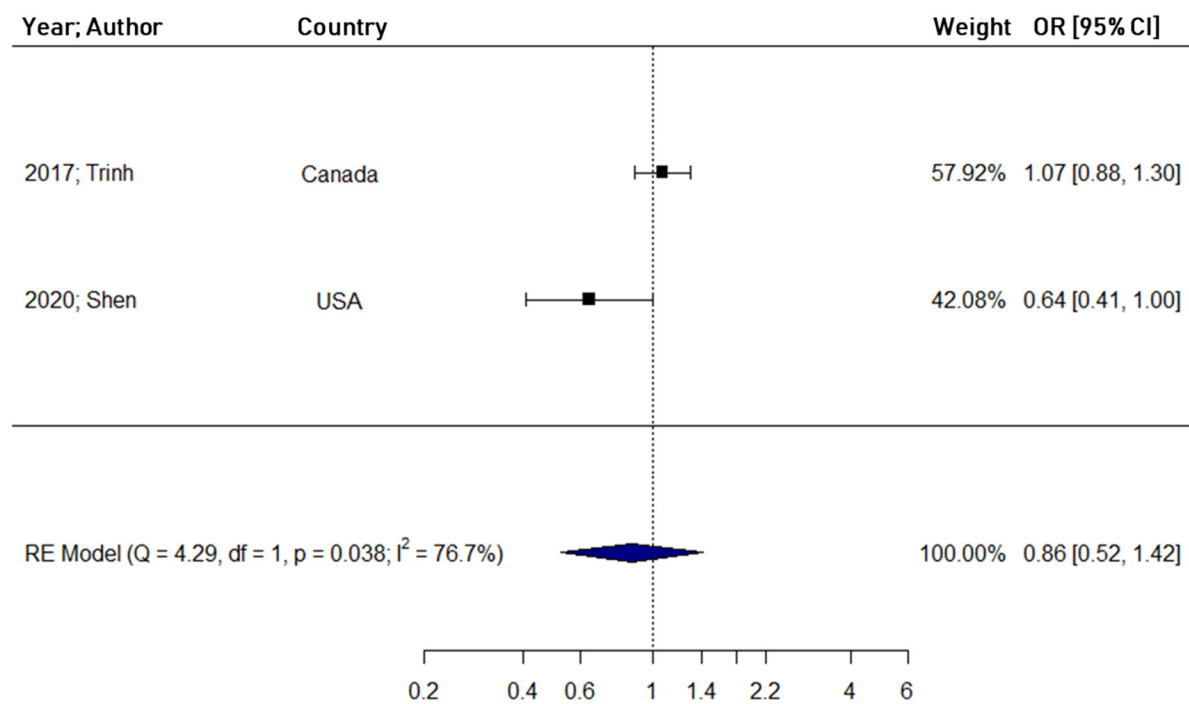

**Suppl. Figure S18.** Forest plot comparing Asian and White patients (reference) regarding home dialysis.

## 5.7. Peritoneal dialysis

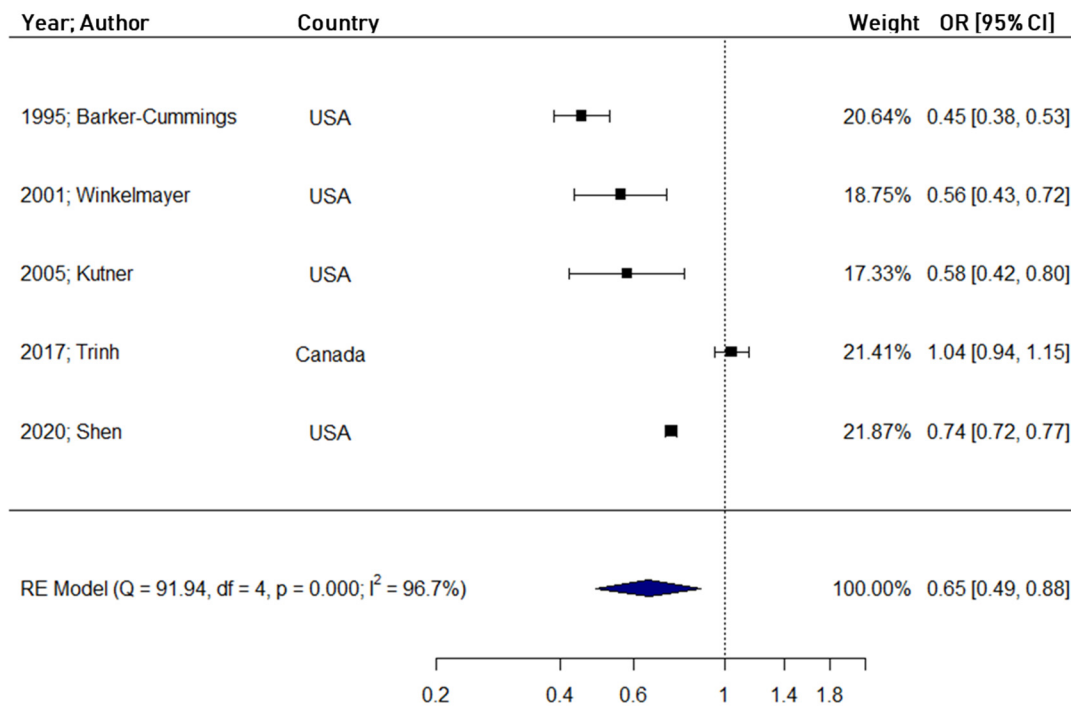

**Suppl. Figure S19.** Forest plot comparing Black and White patients (reference) regarding peritoneal dialysis use.

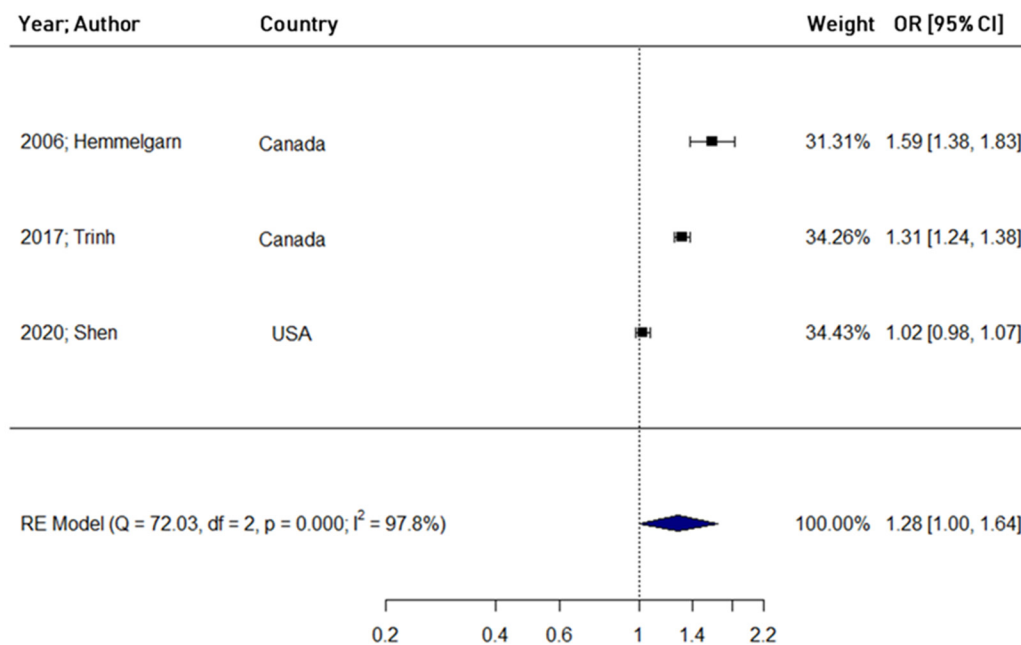

**Suppl. Figure S20.** Forest plot comparing Asian and White patients (reference) regarding peritoneal dialysis use.

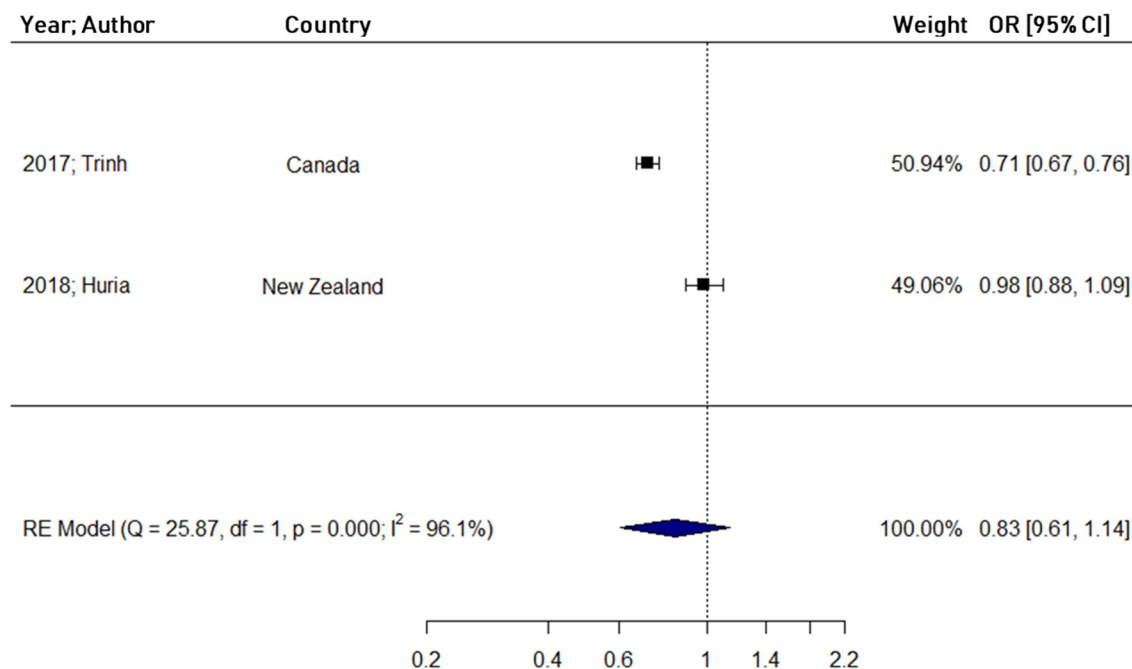

**Suppl. Figure S21.** Forest plot comparing Indigenous and White patients (reference) regarding peritoneal dialysis use.

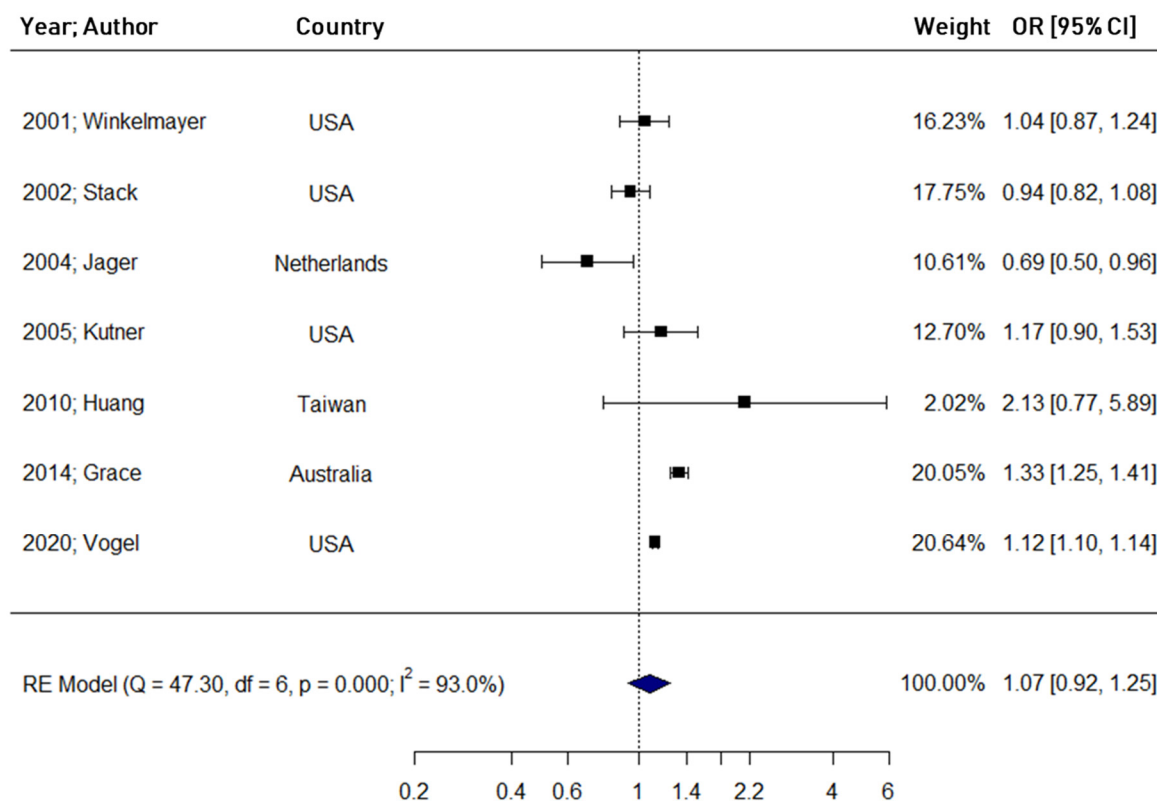

**Suppl. Figure S22.** Forest plot comparing female and male patients (reference) regarding peritoneal dialysis use.

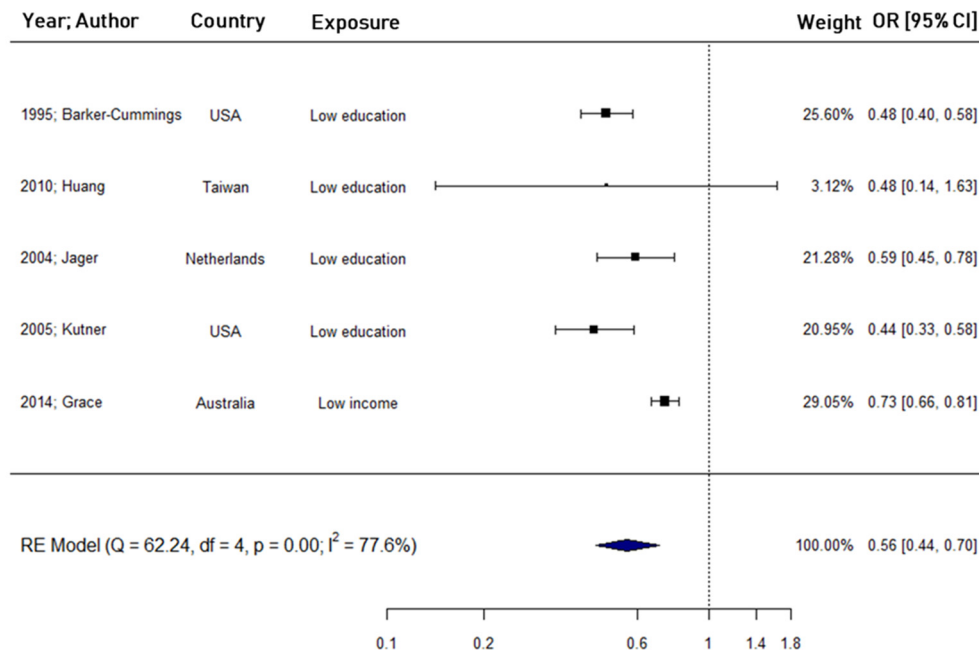

**Suppl. Figure S23.** Forest plot comparing low and high socioeconomic status patients (reference) regarding peritoneal dialysis use.

## 5.8. Dialysis survival

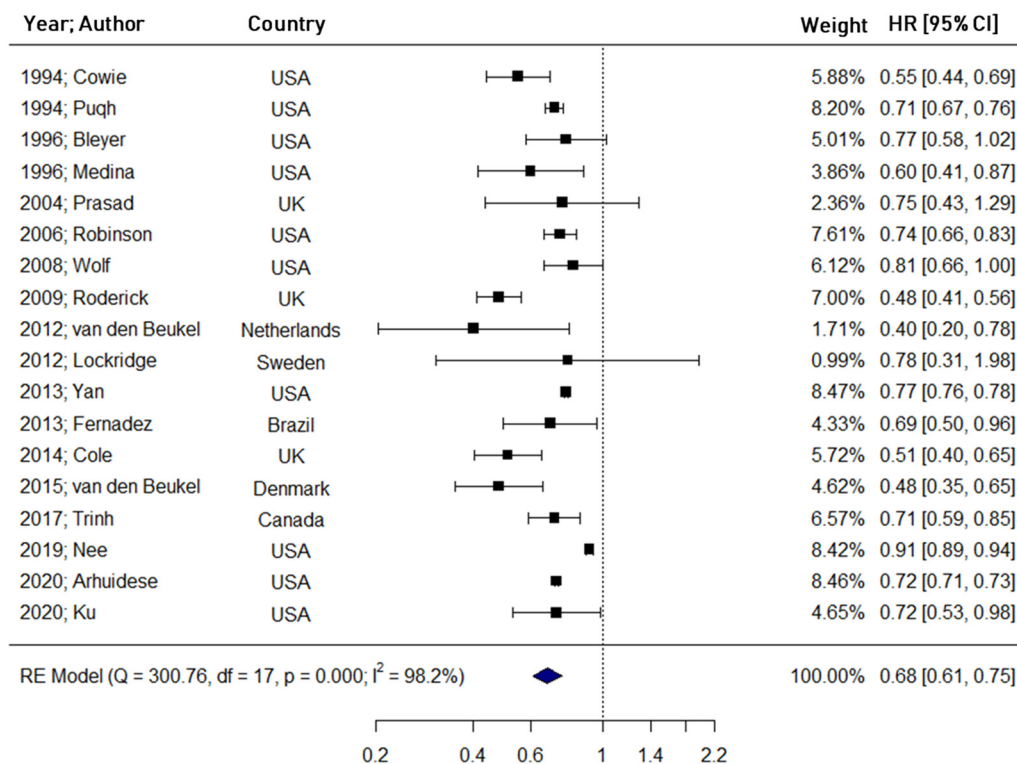

**Suppl. Figure S24.** Forest plot comparing Black and White patients (reference) regarding dialysis mortality.

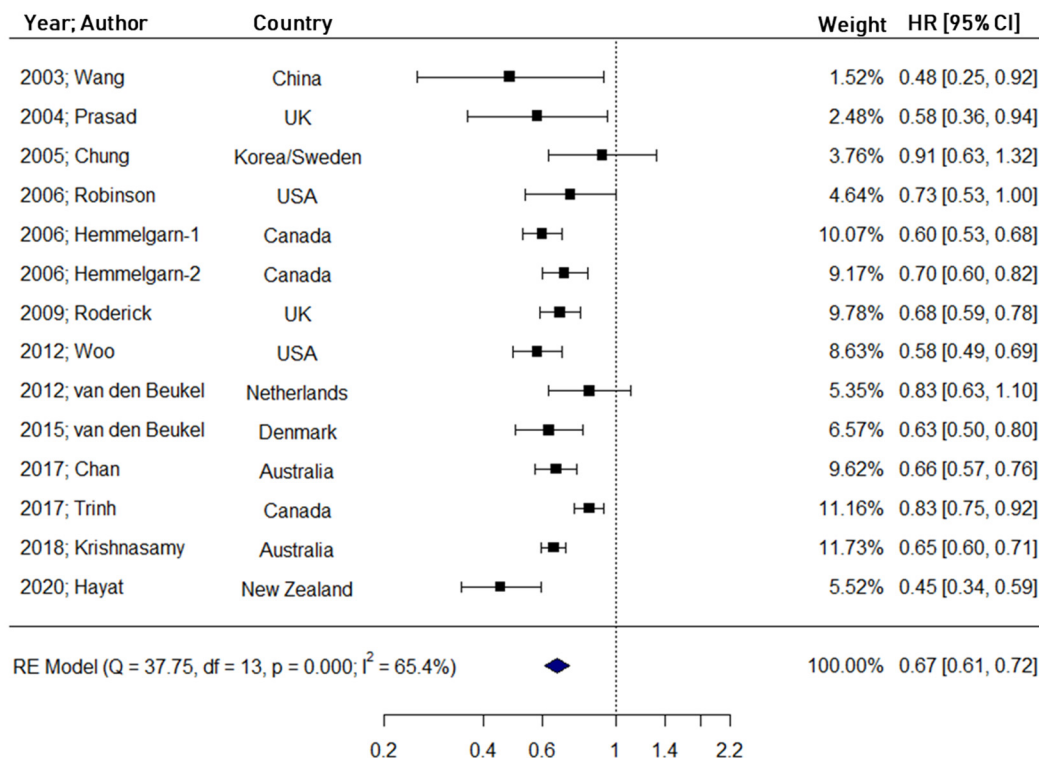

**Suppl. Figure S25.** Forest plot comparing Asian and White patients (reference) regarding dialysis mortality.

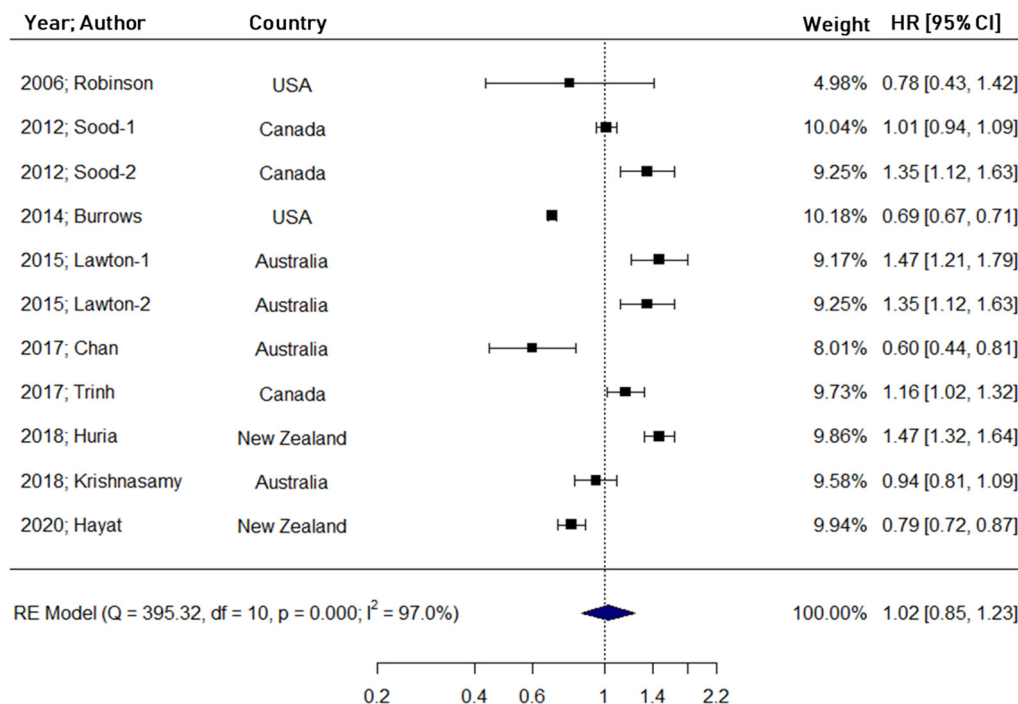

**Suppl. Figure S26.** Forest plot comparing Indigenous and White patients (reference) regarding dialysis mortality.

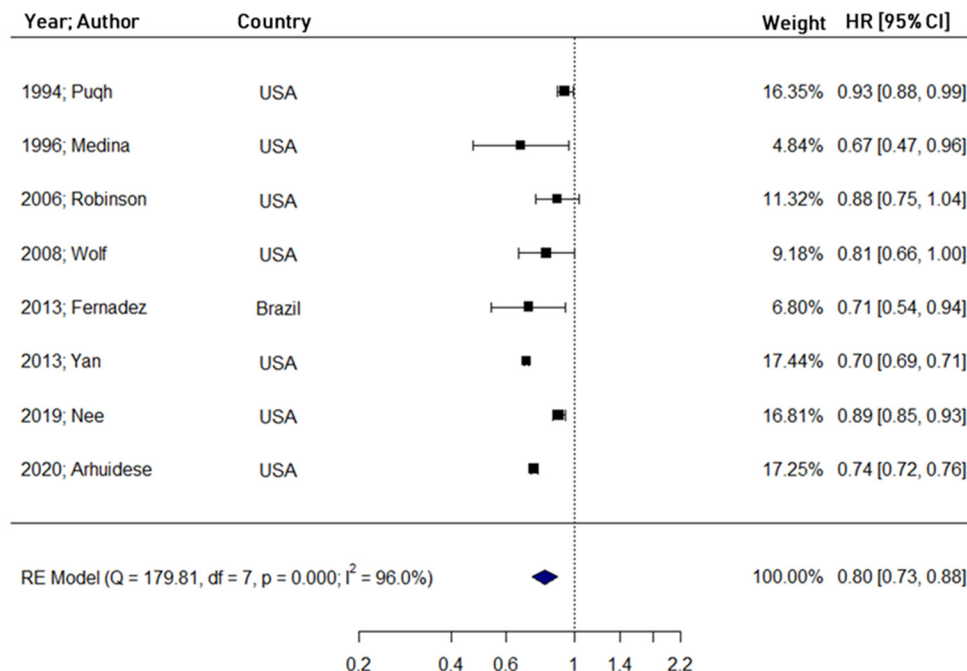

**Suppl. Figure S27.** Forest plot of comparing Hispanic and White patients (reference) regarding dialysis mortality.

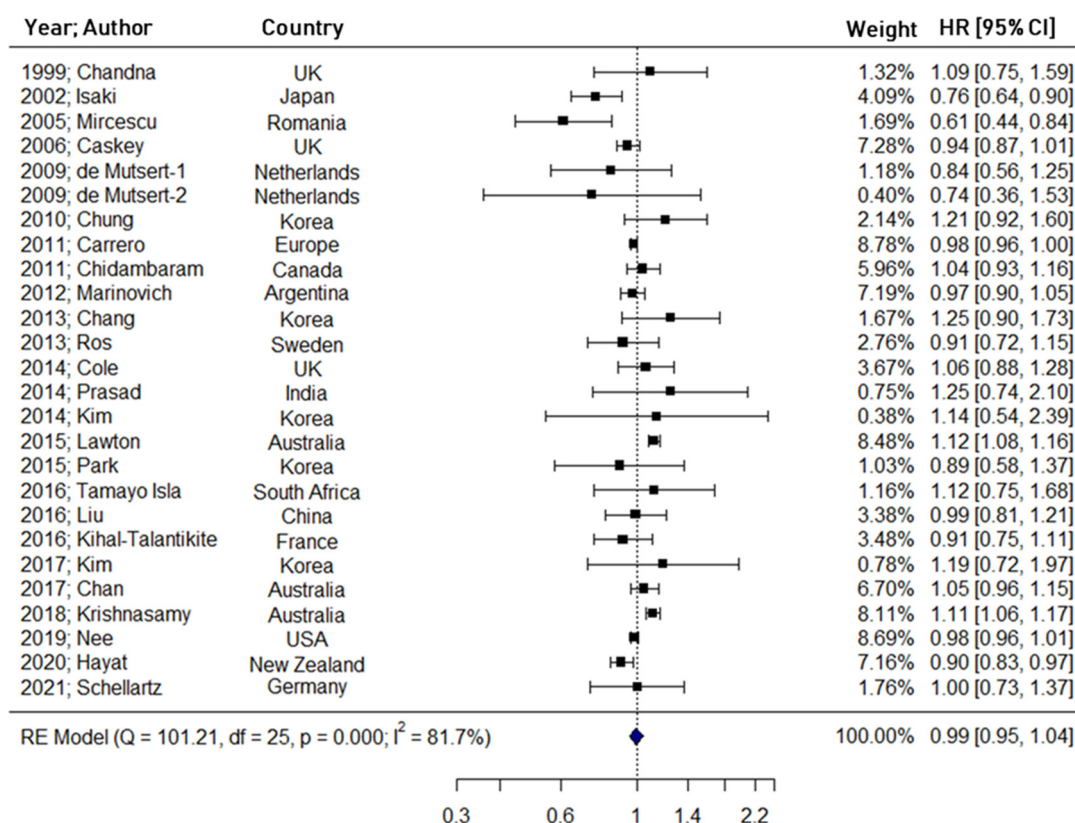

**Suppl. Figure S28.** Forest plot comparing female and male patients (reference) regarding dialysis mortality.



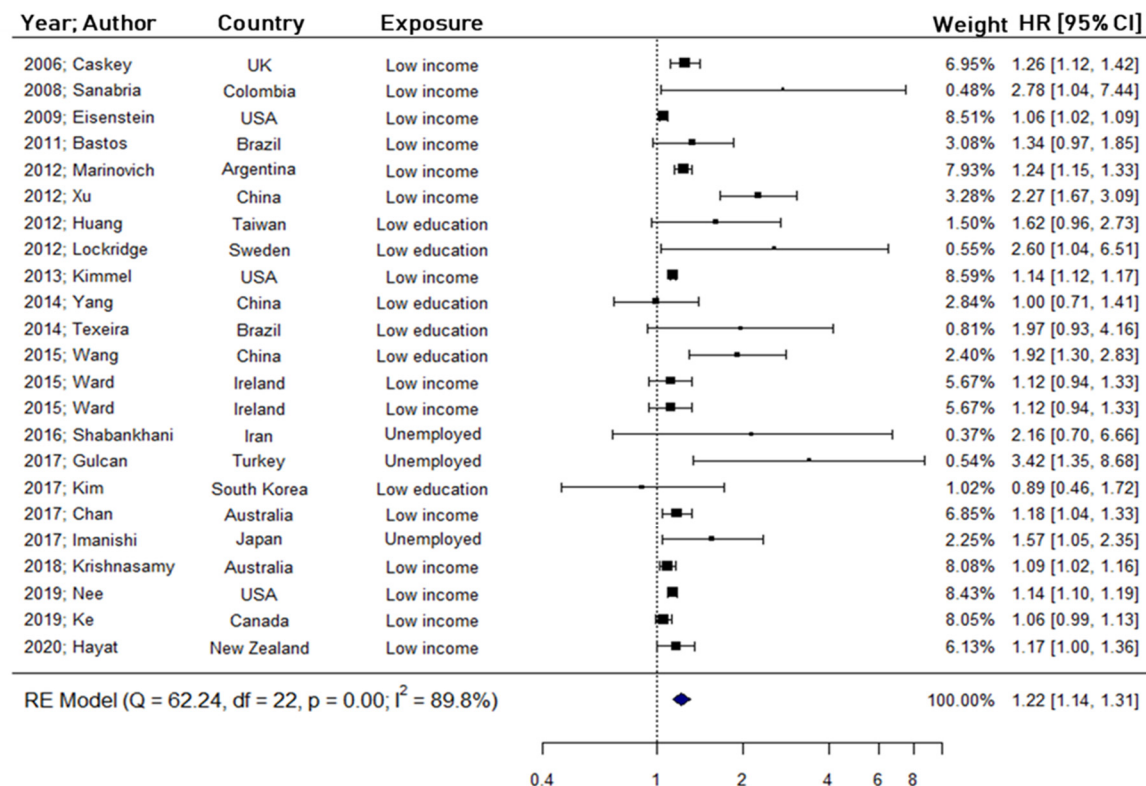

**Suppl. Figure S29.** Forest plot comparing low and high socioeconomic status patients (reference) regarding dialysis mortality.

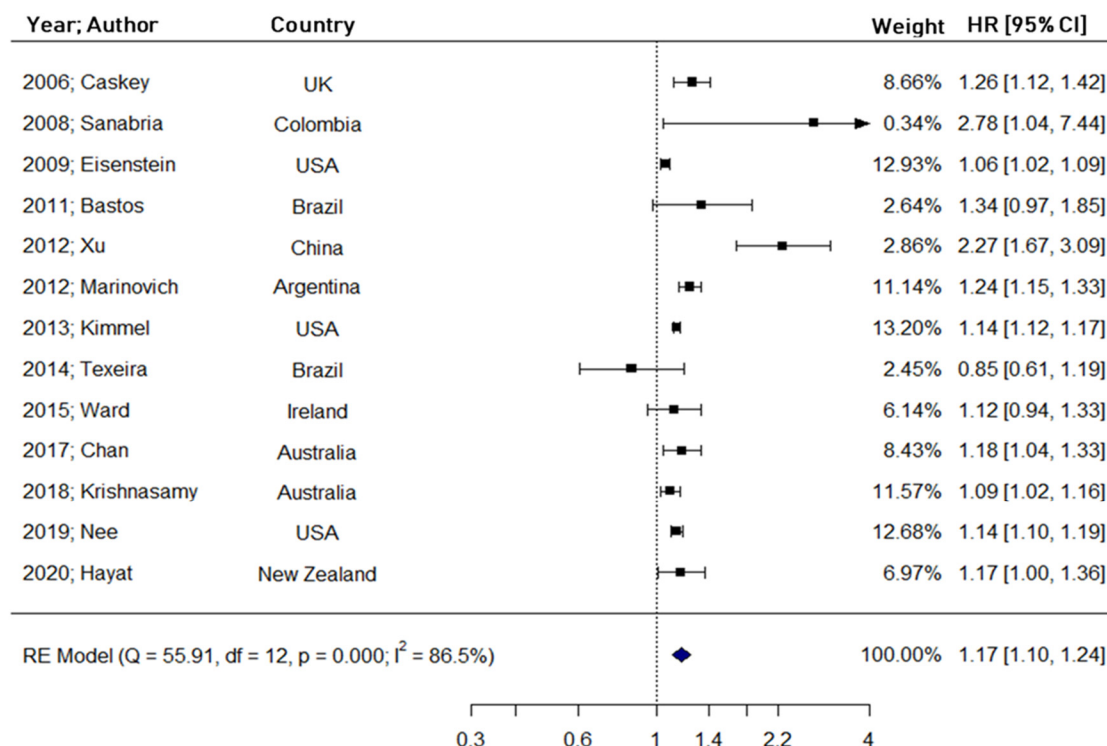

**Suppl. Figure S30.** Forest plot comparing low- and high-income patients (reference) regarding dialysis mortality.

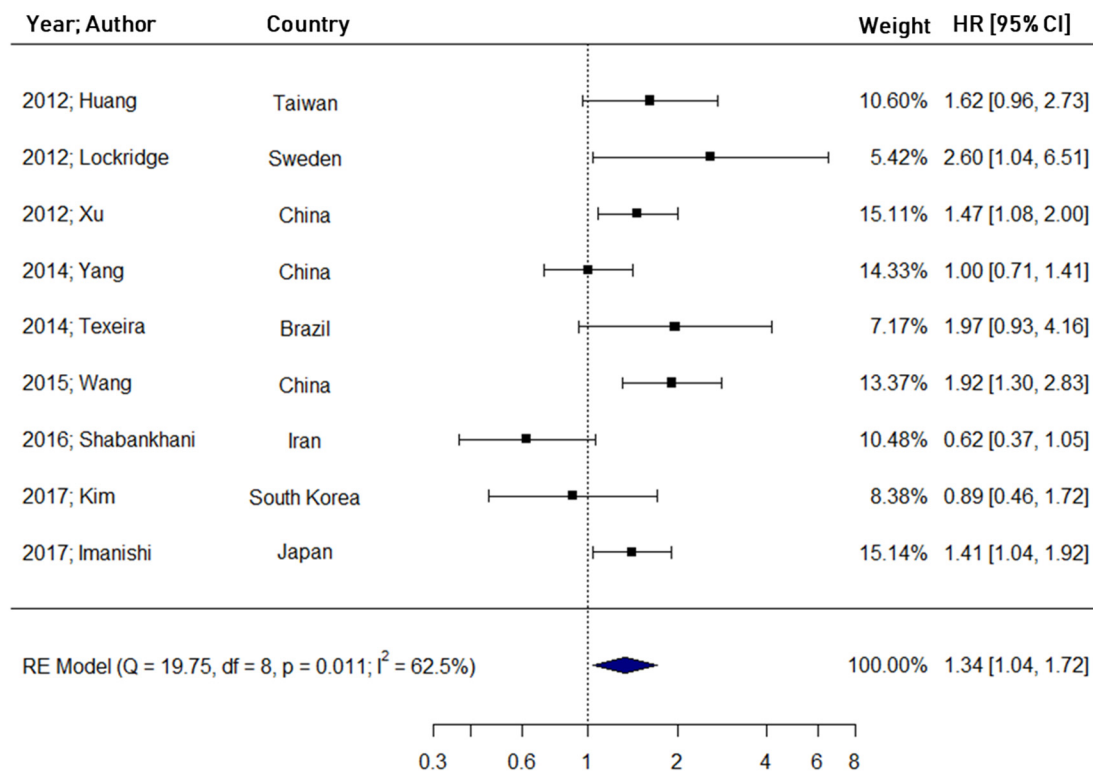

**Suppl. Figure S31.** Forest plot comparing low and high education patients (reference) regarding on dialysis mortality.

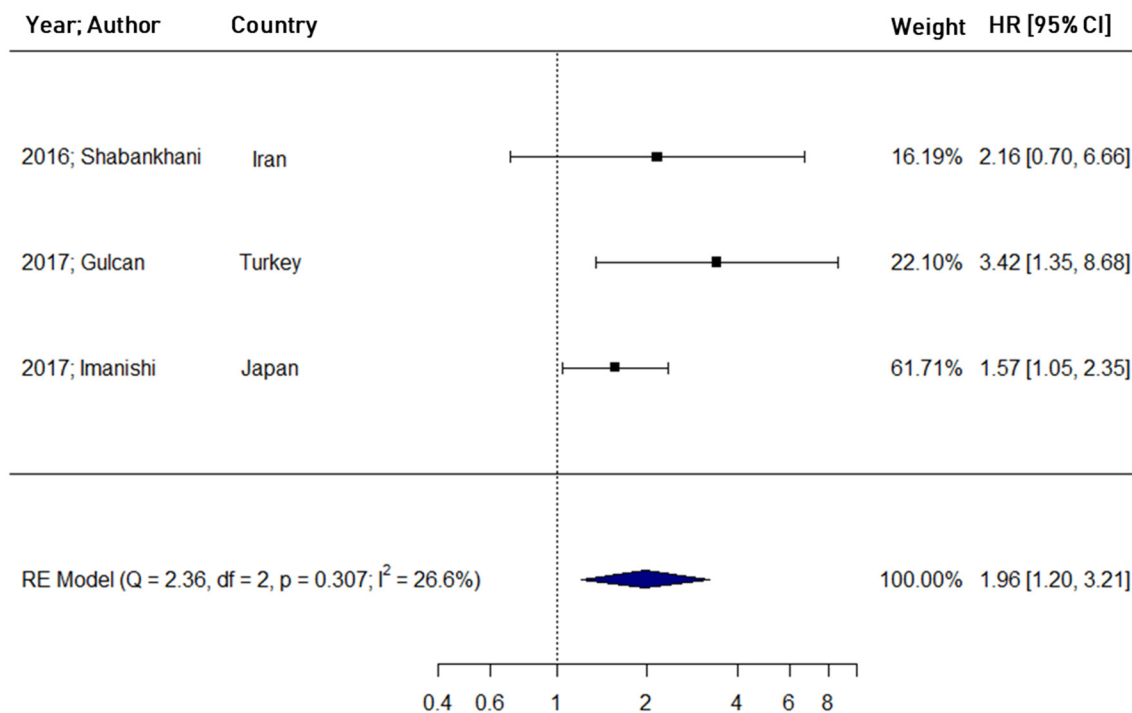

**Suppl. Figure S32.** Forest plot comparing unemployed and employed patients (reference) regarding dialysis mortality.



## 5.9. Waitlisting

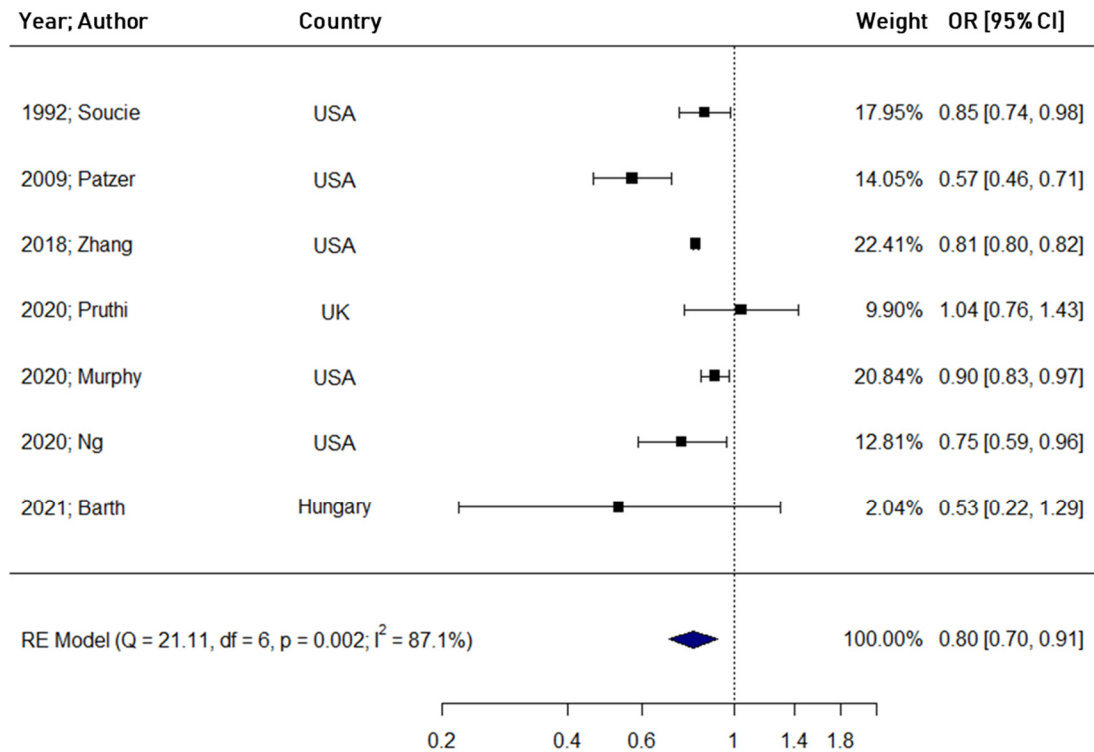

Suppl.

**Figure S33.** Forest plot comparing Black and White patients (reference) regarding waitlisting.

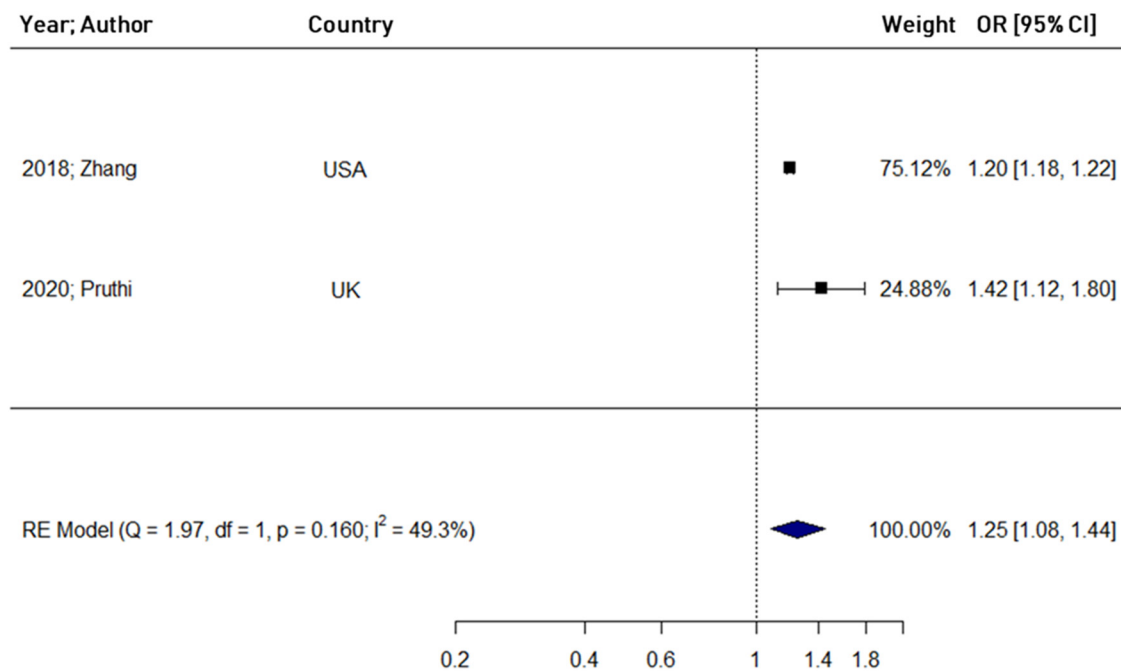

**Suppl. Figure S34.** Forest plot comparing Asian and White patients (reference) regarding waitlisting.

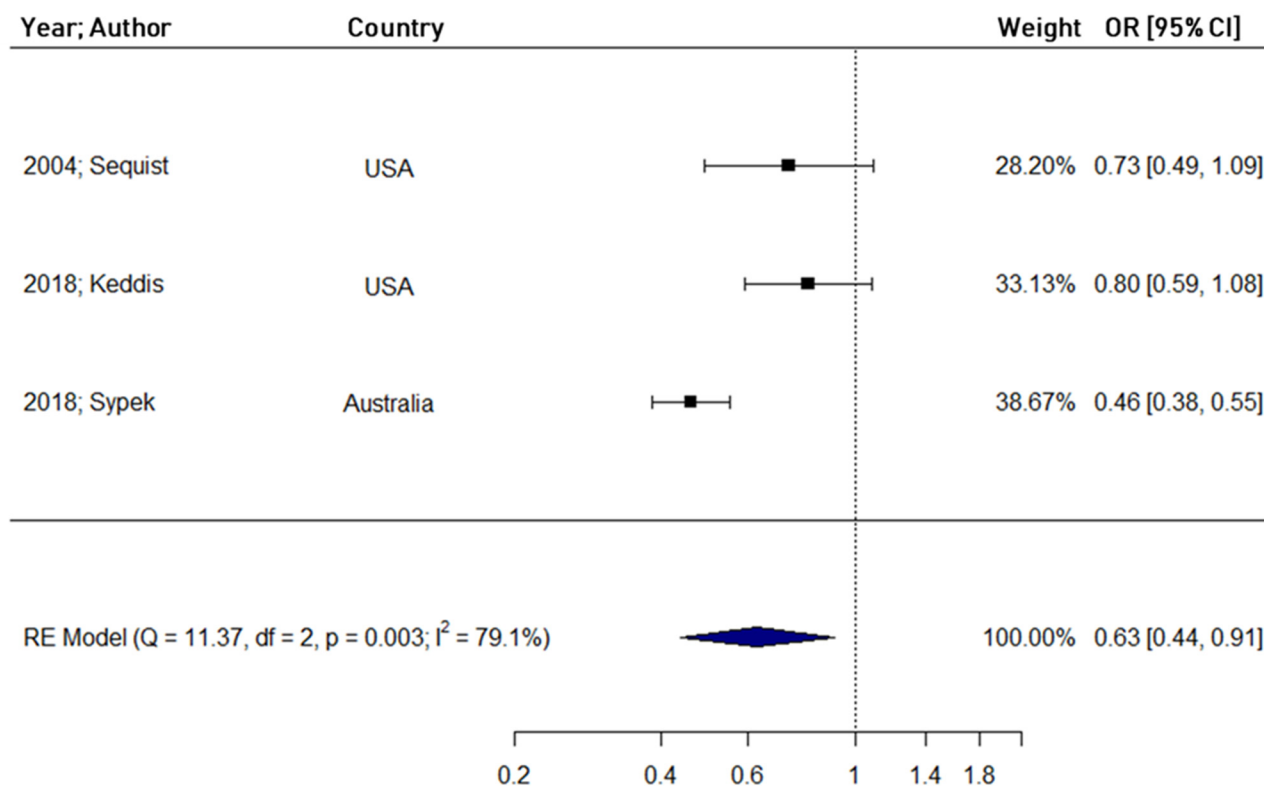

**Suppl. Figure S35.** Forest plot comparing Indigenous and White patients (reference) regarding waitlisting.

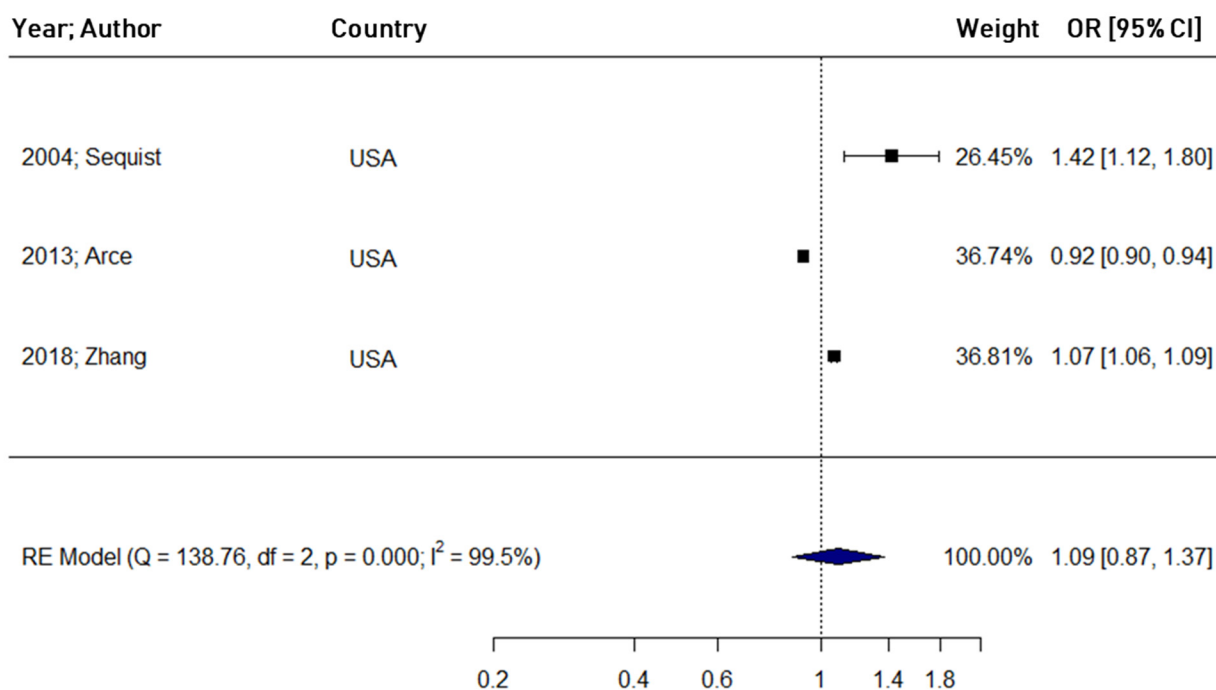

**Suppl. Figure S36.** Forest plot comparing Hispanic and White patients (reference) regarding waitlisting.

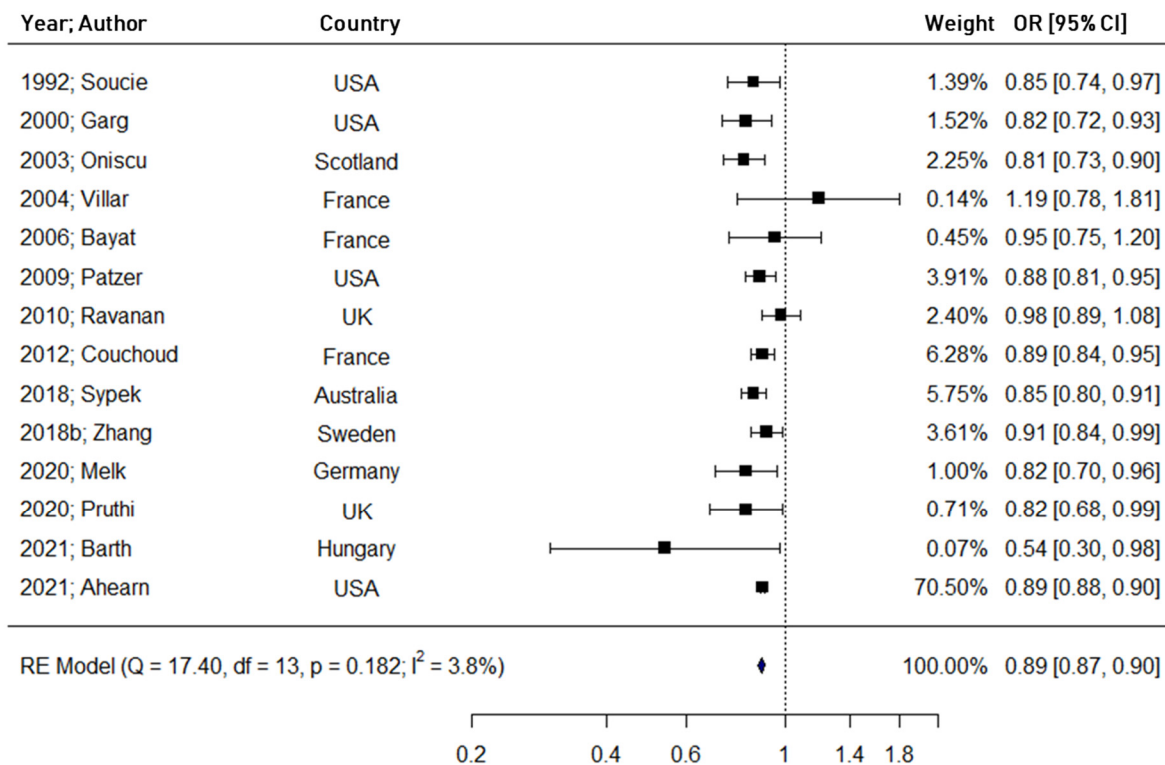

**Suppl. Figure S37.** Forest plot comparing female and male patients (reference) regarding waitlisting.

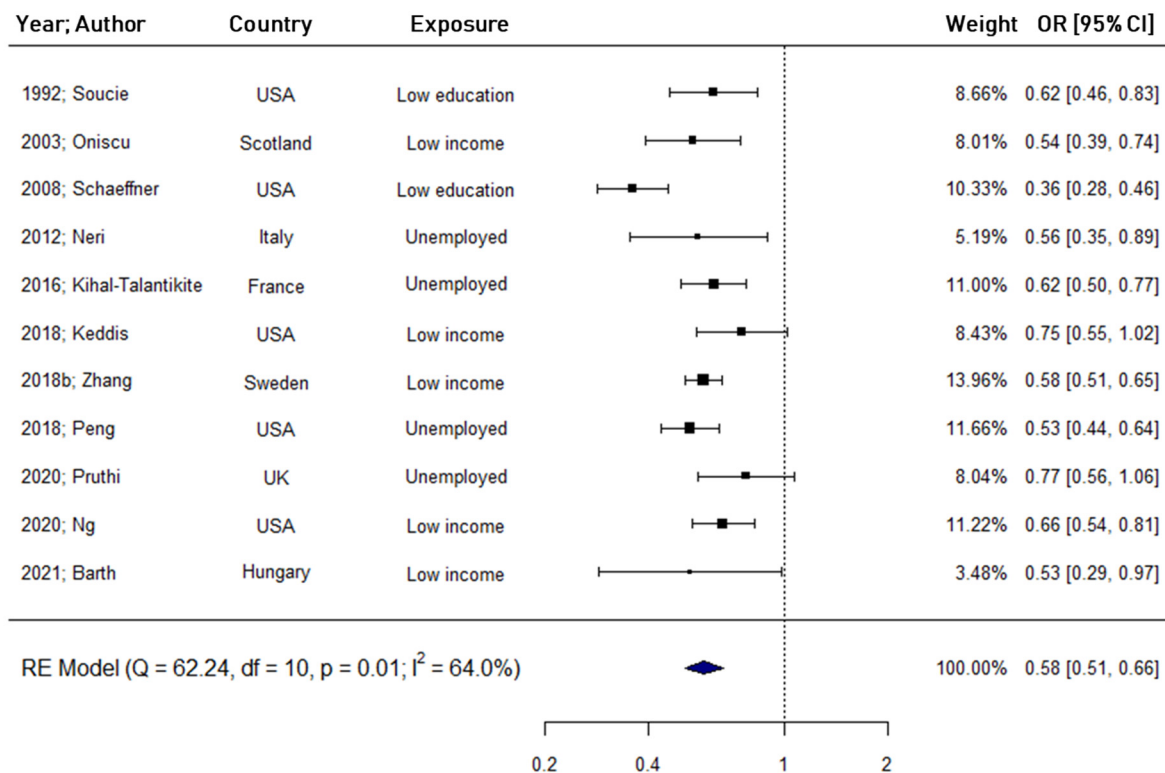

**Suppl. Figure S38.** Forest plot comparing low and high socioeconomic status patients (reference) regarding waitlisting.

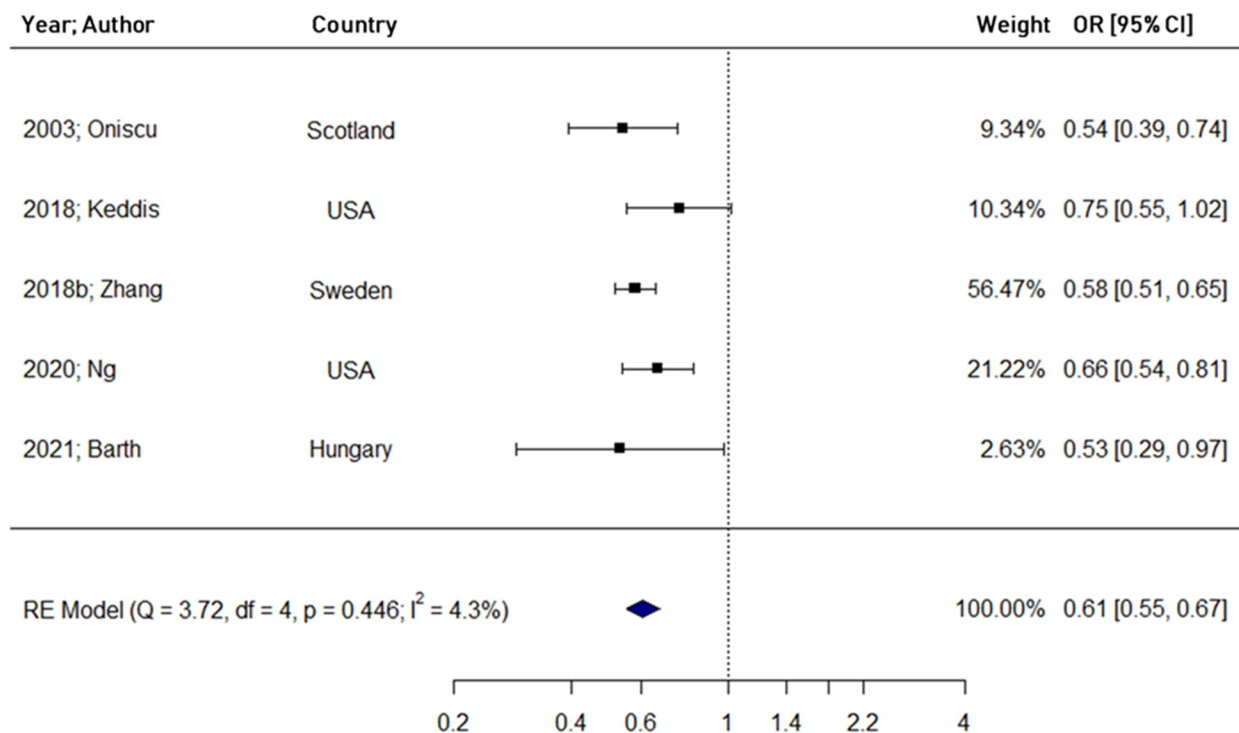

**Suppl. Figure S39.** Forest plot comparing low- and high-income patients (reference) regarding waitlisting.

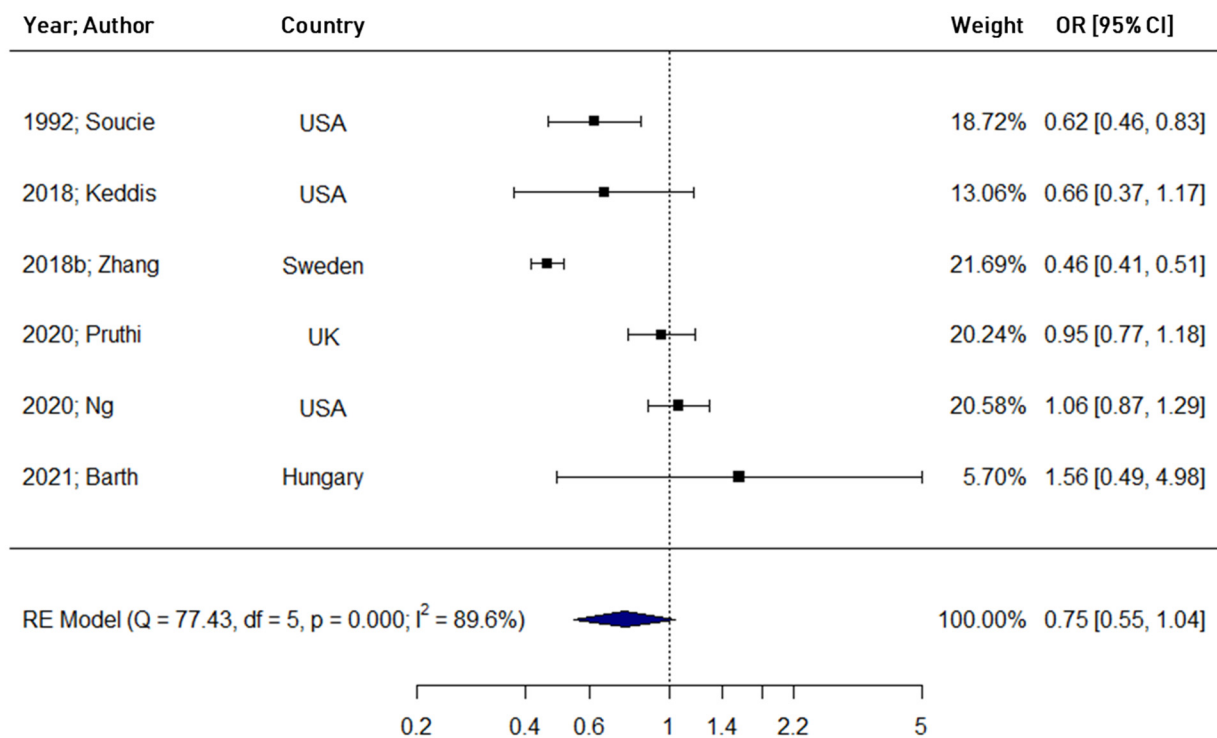

**Suppl. Figure S40.** Forest plot comparing low and high education patients (reference) regarding waitlisting.

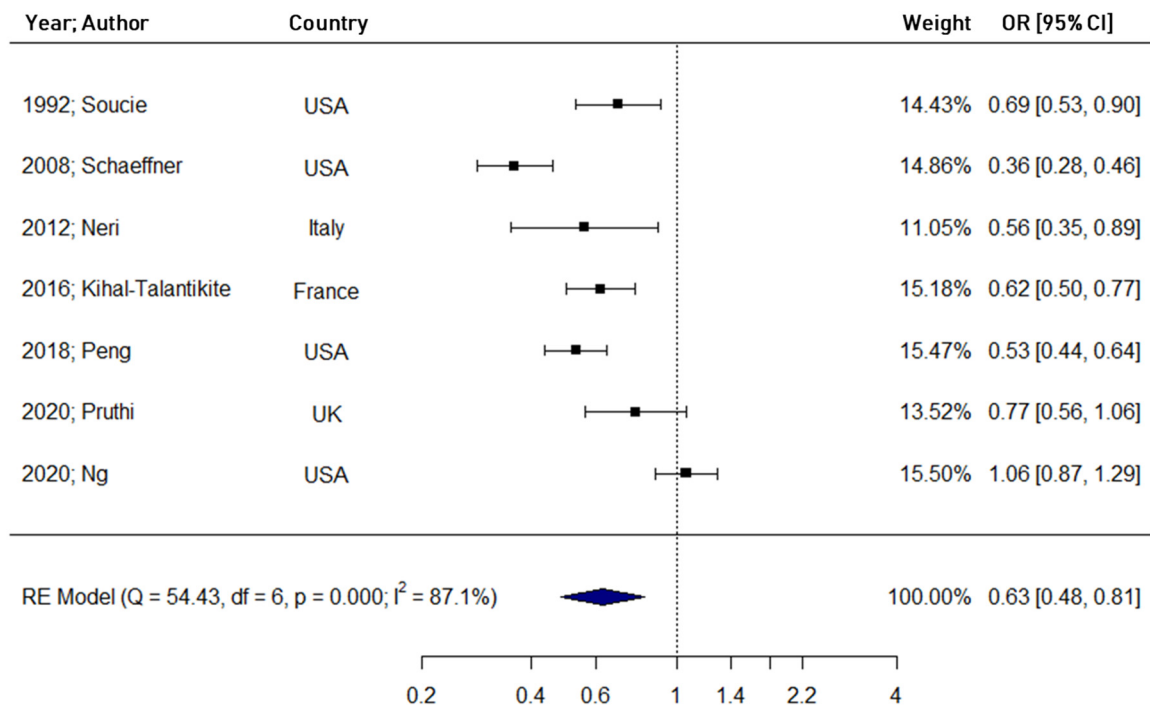

**Suppl. Figure S41.** Forest plot comparing unemployed and employed patients (reference) regarding on waitlisting.

## 5.10. Kidney transplantation

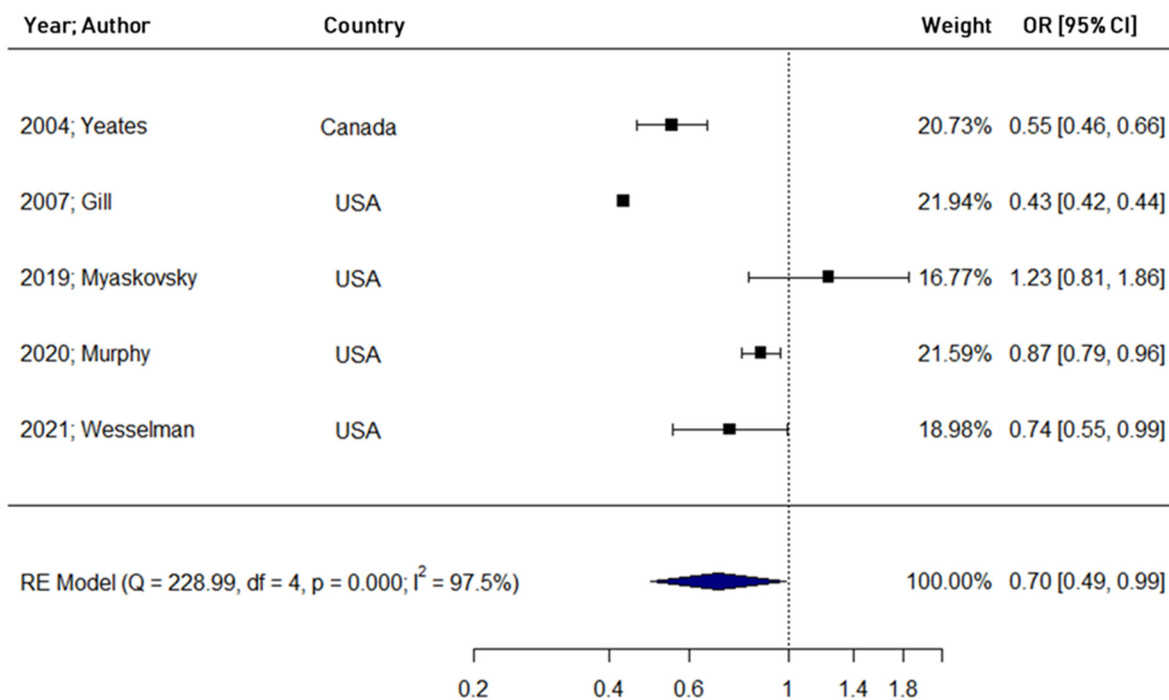

**Suppl. Figure S42.** Forest plot comparing Black and White patients (reference) regarding kidney transplantation.

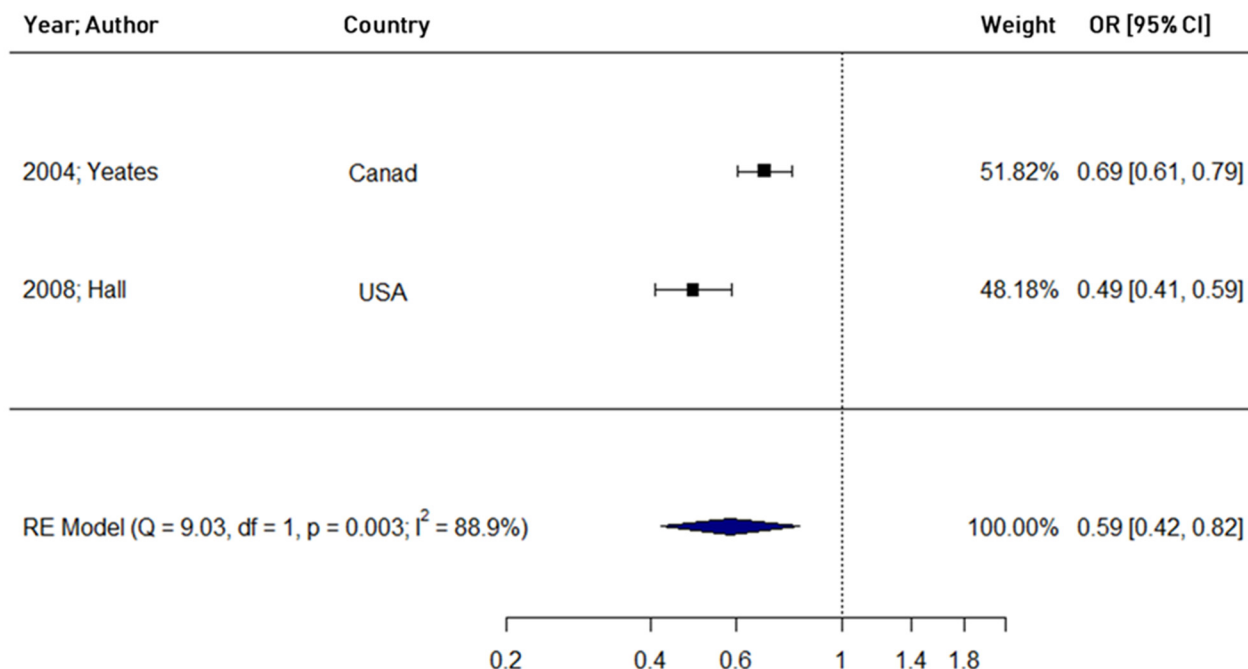

**Suppl. Figure S43.** Forest plot comparing Asian and White patients (reference) regarding kidney transplantation.

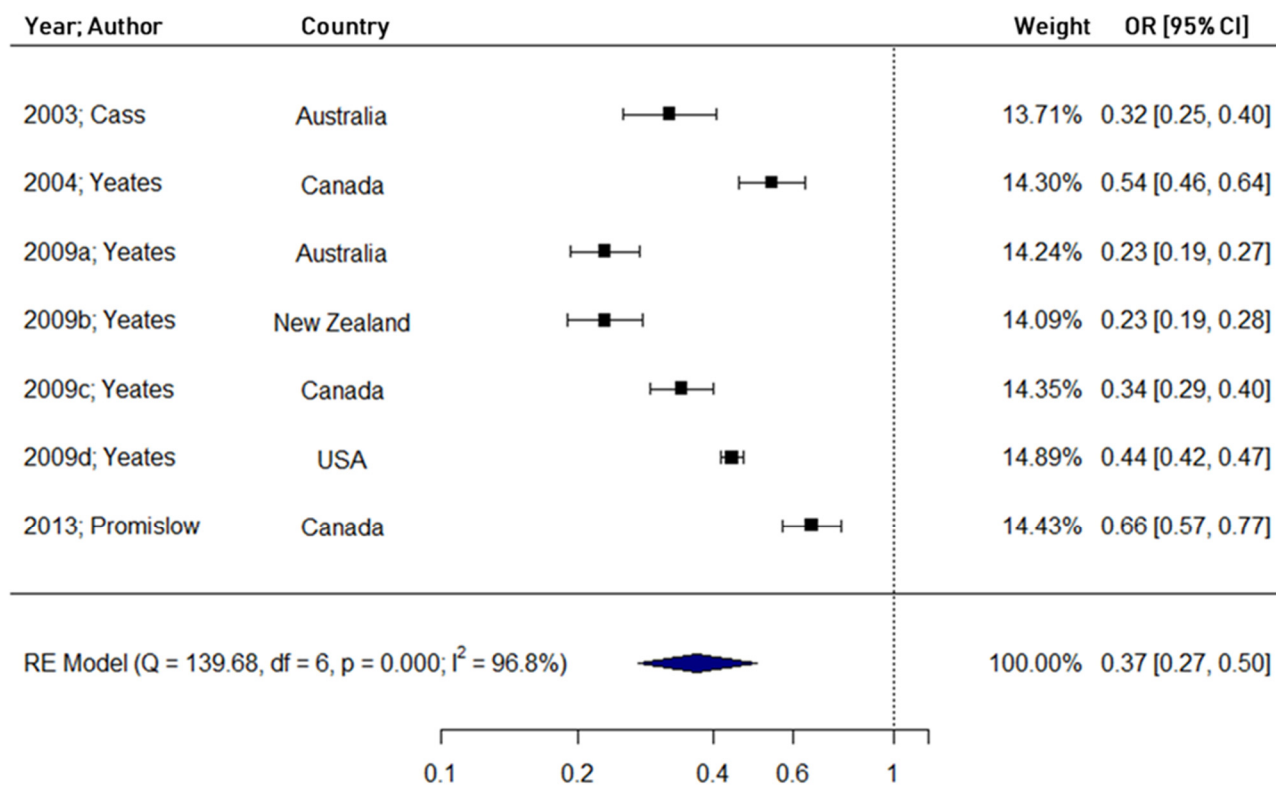

**Suppl. Figure S44.** Forest plot comparing Indigenous and White patients (reference) regarding kidney transplantation.

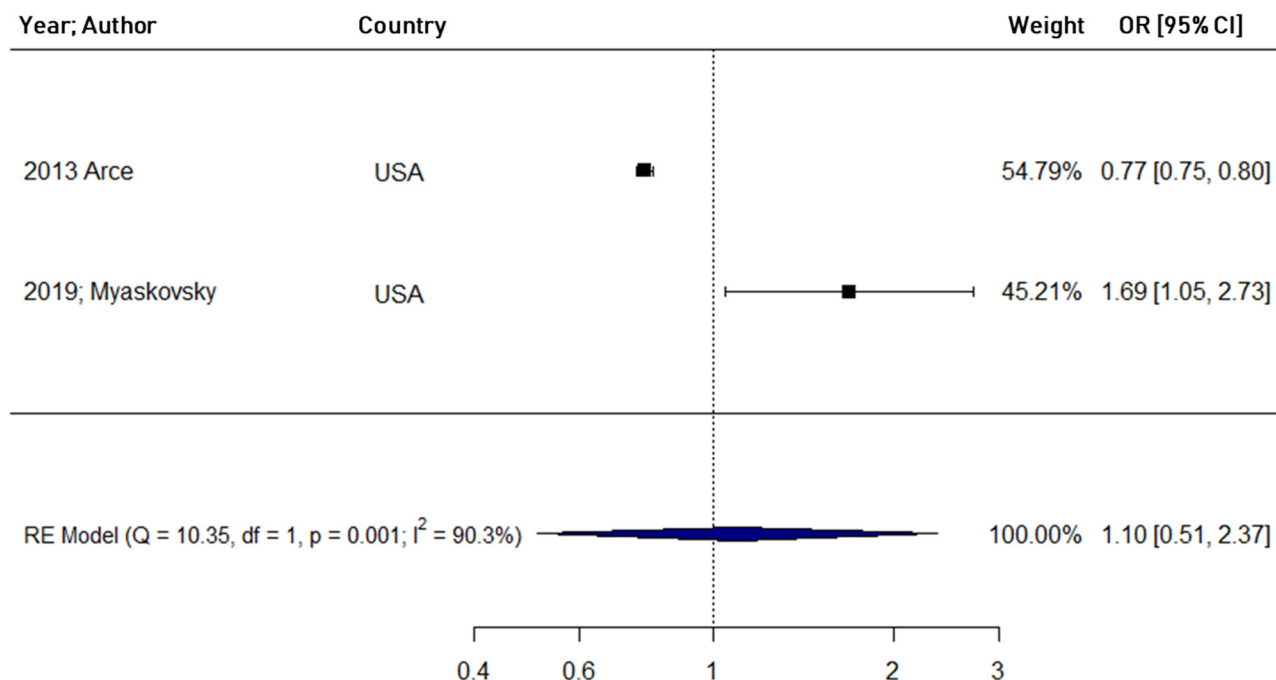

**Suppl. Figure S45.** Forest plot comparing Hispanic and White patients (reference) regarding kidney transplantation.

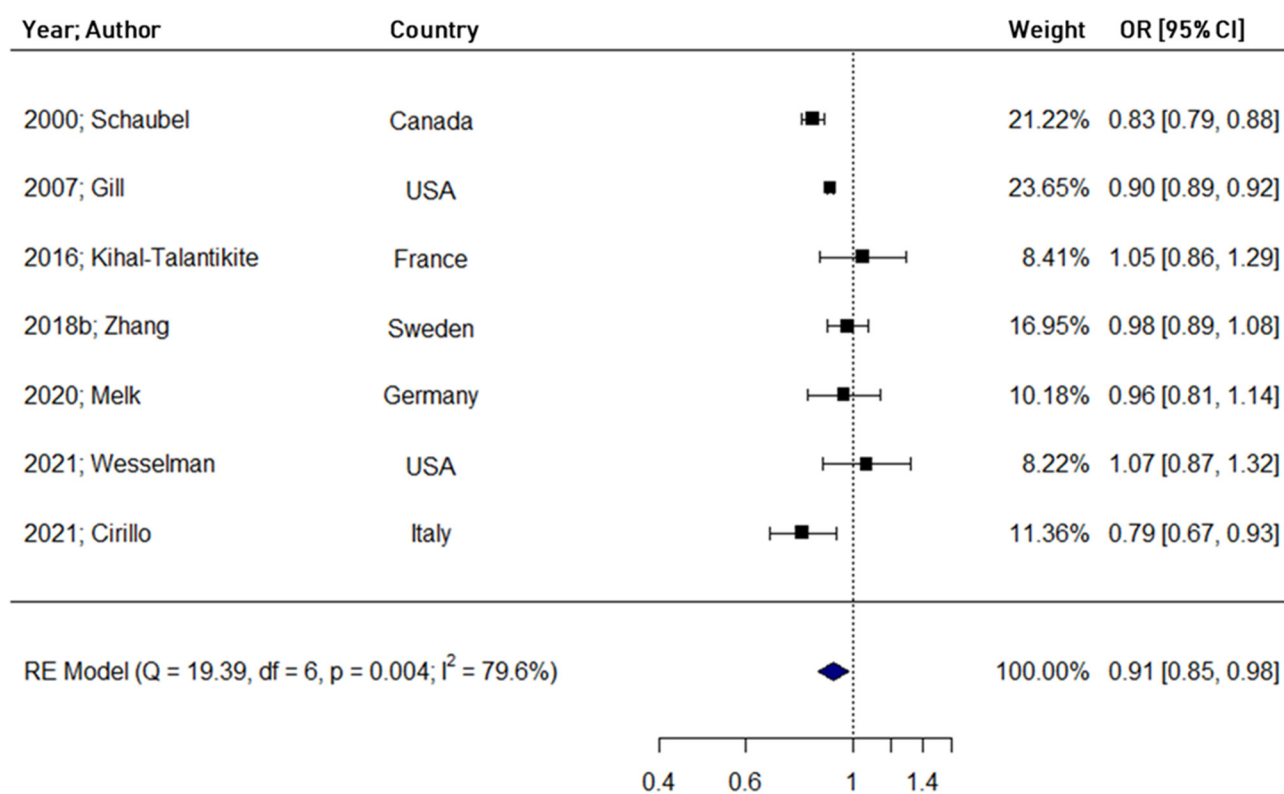

**Suppl. Figure S46.** Forest plot comparing female and male patients (reference) regarding kidney transplantation.

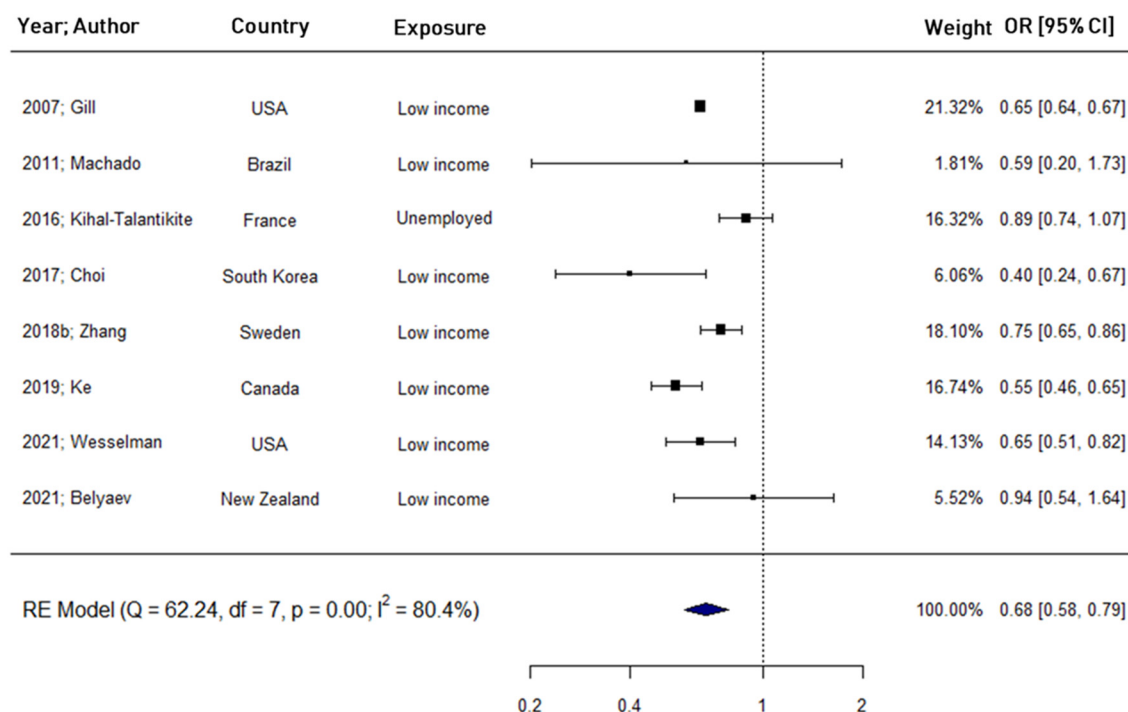

**Suppl. Figure S47.** Forest plot comparing low and high socioeconomic status patients (reference) regarding kidney transplantation.

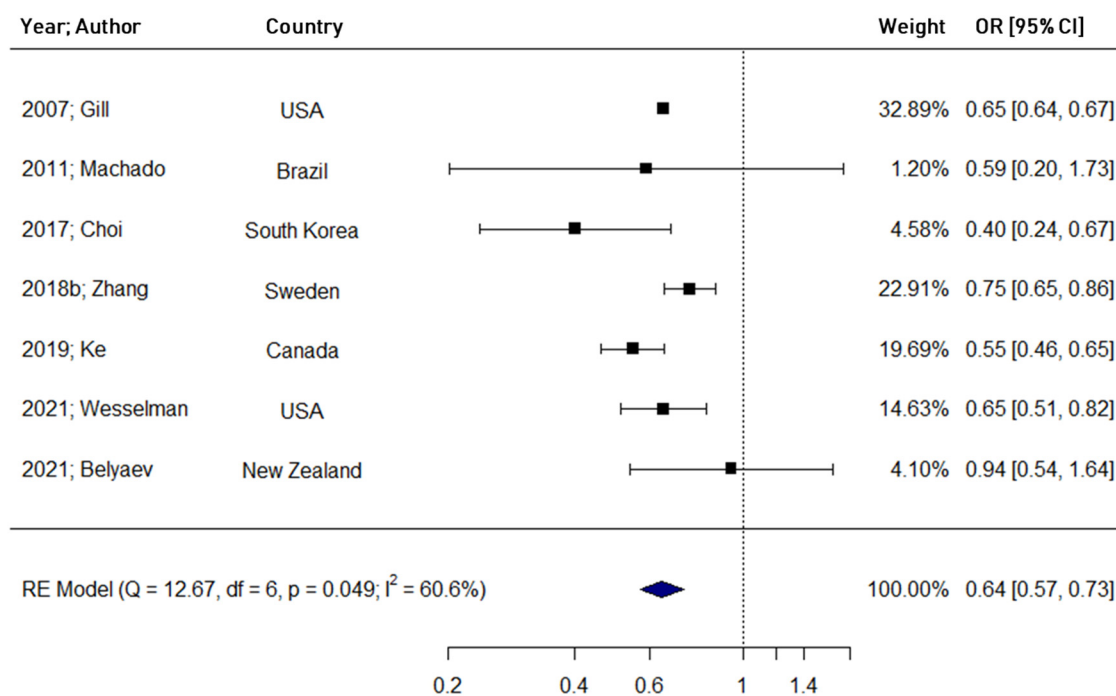

**Suppl. Figure S48.** Forest plot comparing low- and high- income patients (reference) regarding kidney transplantation.



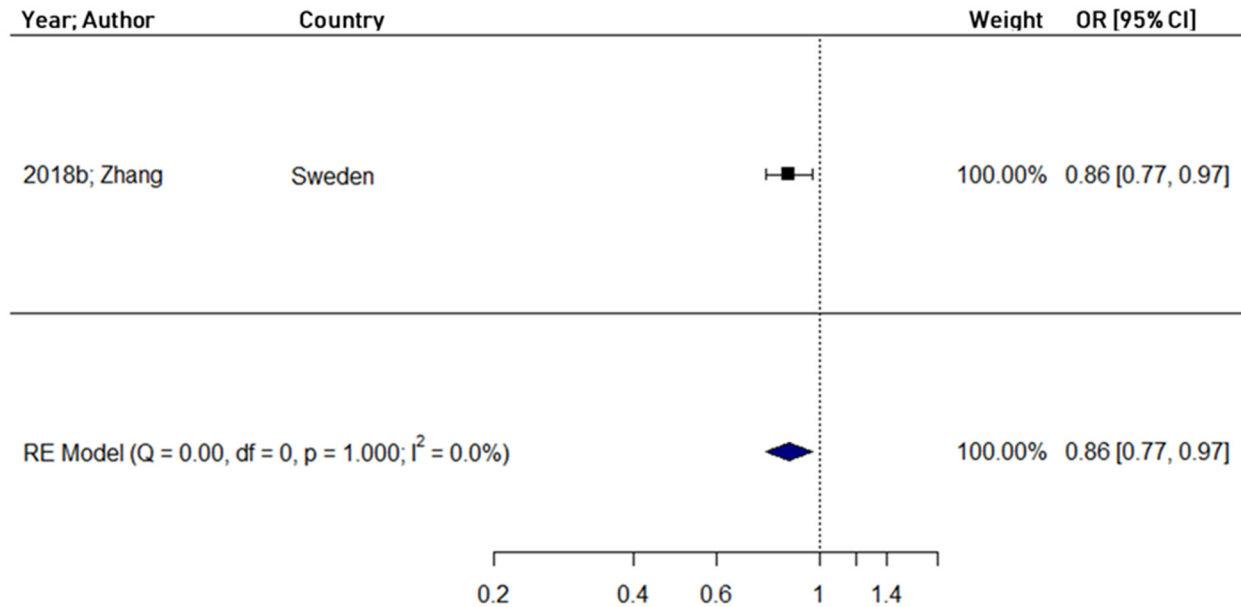

**Suppl. Figure S49.** Forest plot comparing low and high education patients (reference) regarding kidney transplantation.

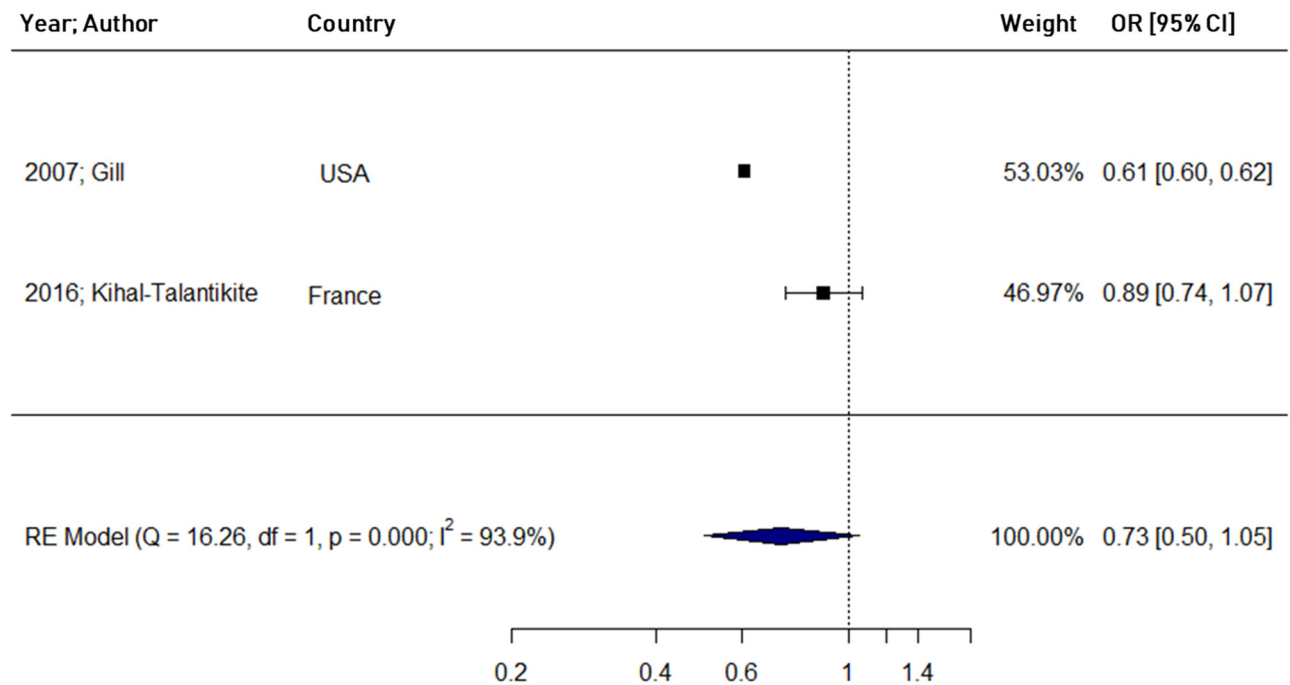

**Suppl. Figure S50.** Forest plot comparing unemployed and employed patients (reference) regarding kidney transplantation.

### 5.11. Living-donor transplantation

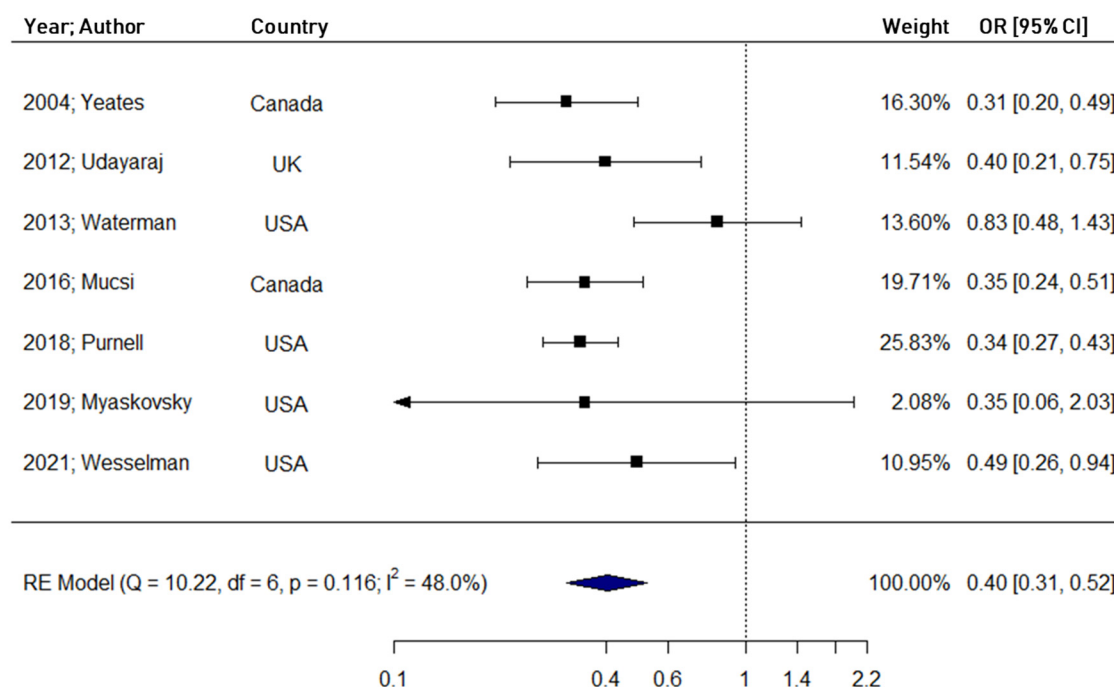

**Suppl. Figure S51.** Forest plot comparing Black and White patients (reference) regarding living-donor transplantation.

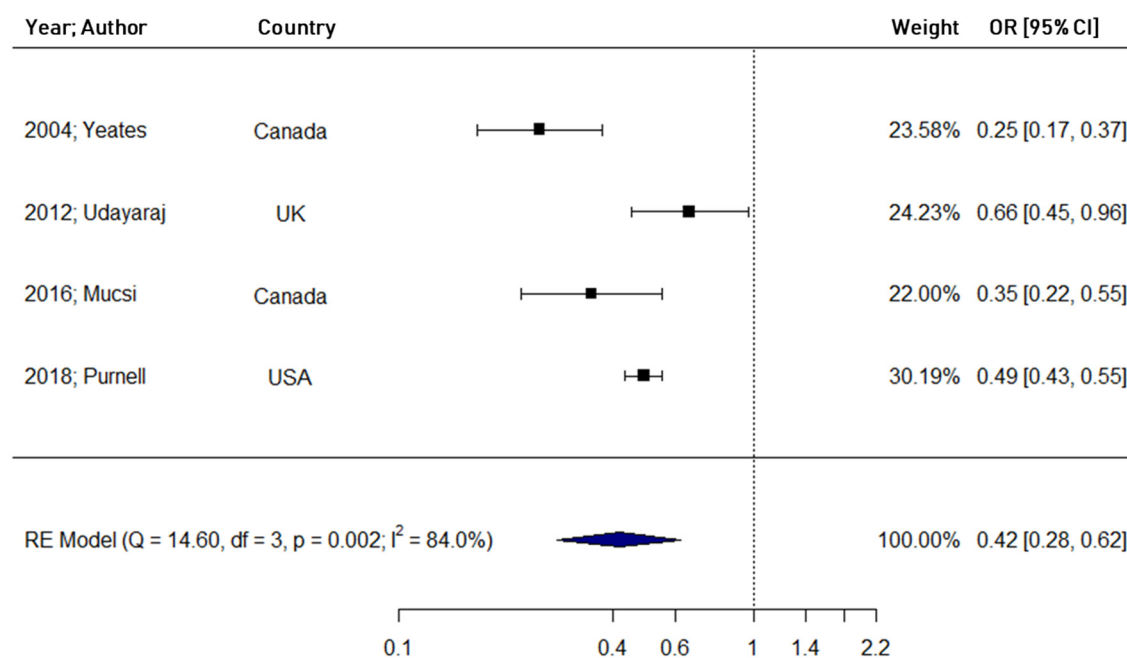

**Suppl. Figure S52.** Forest plot comparing Asian and White patients (reference) regarding living-donor transplantation.

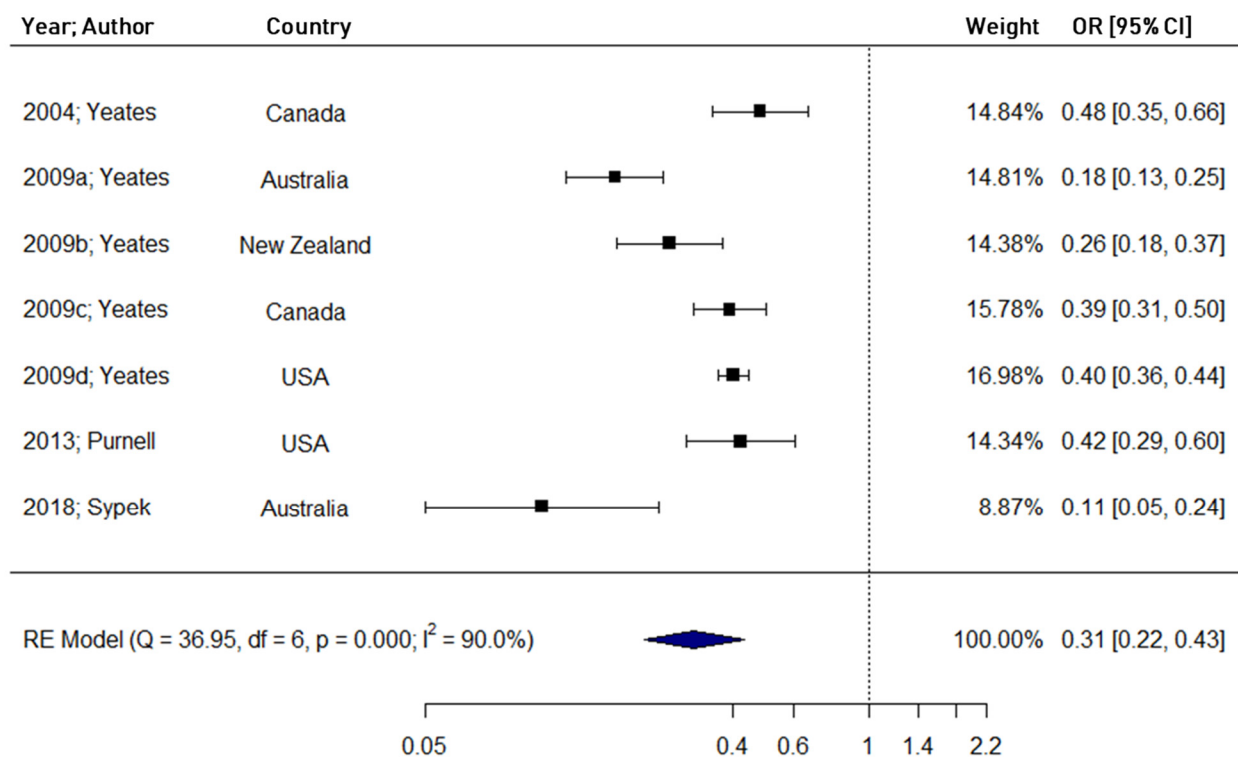

**Suppl. Figure S53.** Forest plot comparing Indigenous and White patients (reference) regarding living-donor transplantation.

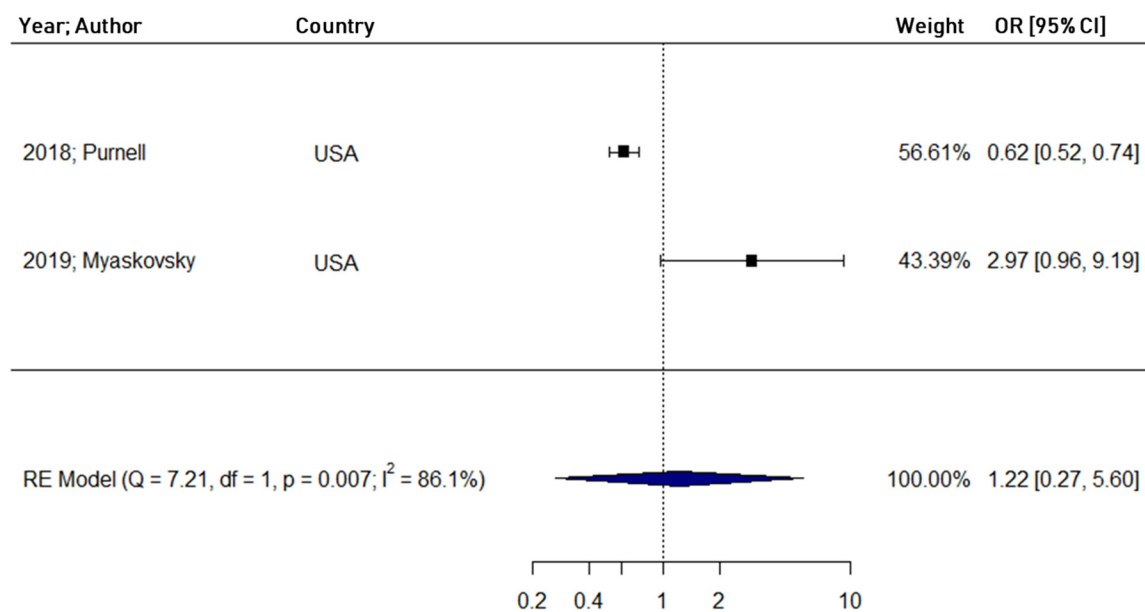

**Suppl. Figure S54.** Forest plot comparing Hispanic and White patients (reference) regarding living-donor transplantation.

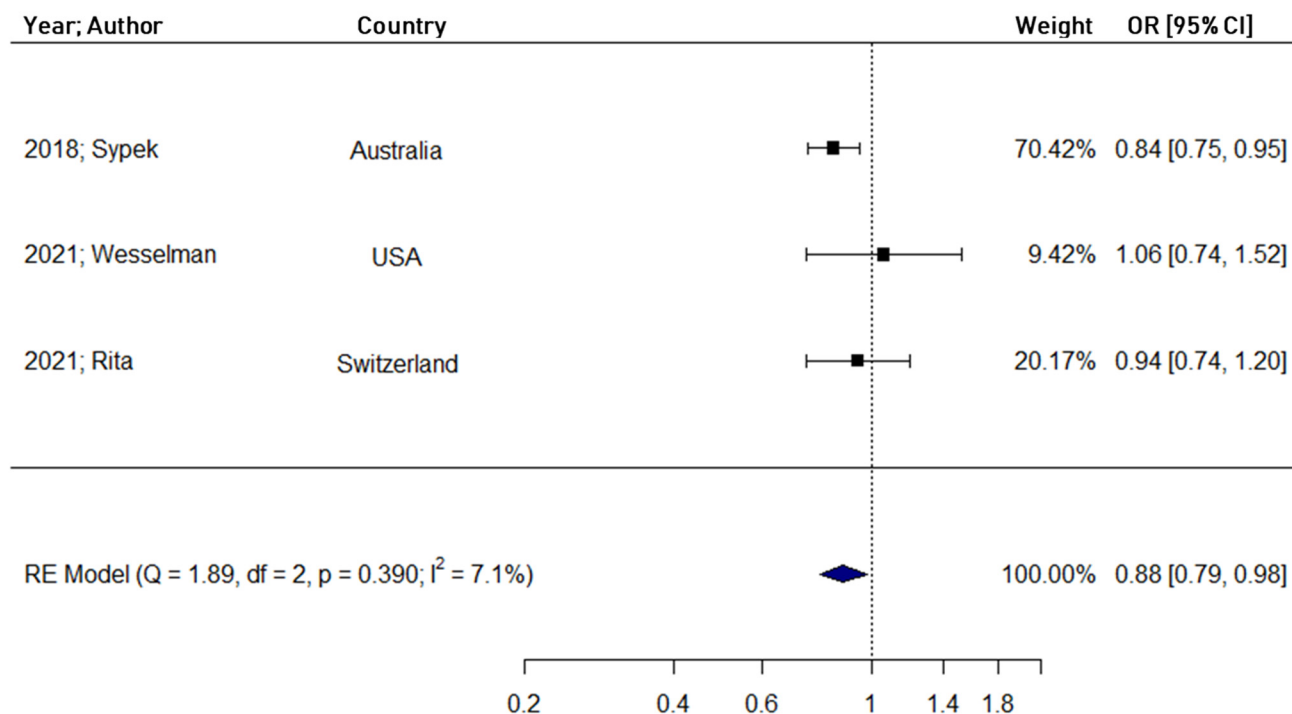

**Suppl. Figure S55.** Forest plot comparing female and male patients (reference) regarding living-donor transplantation.

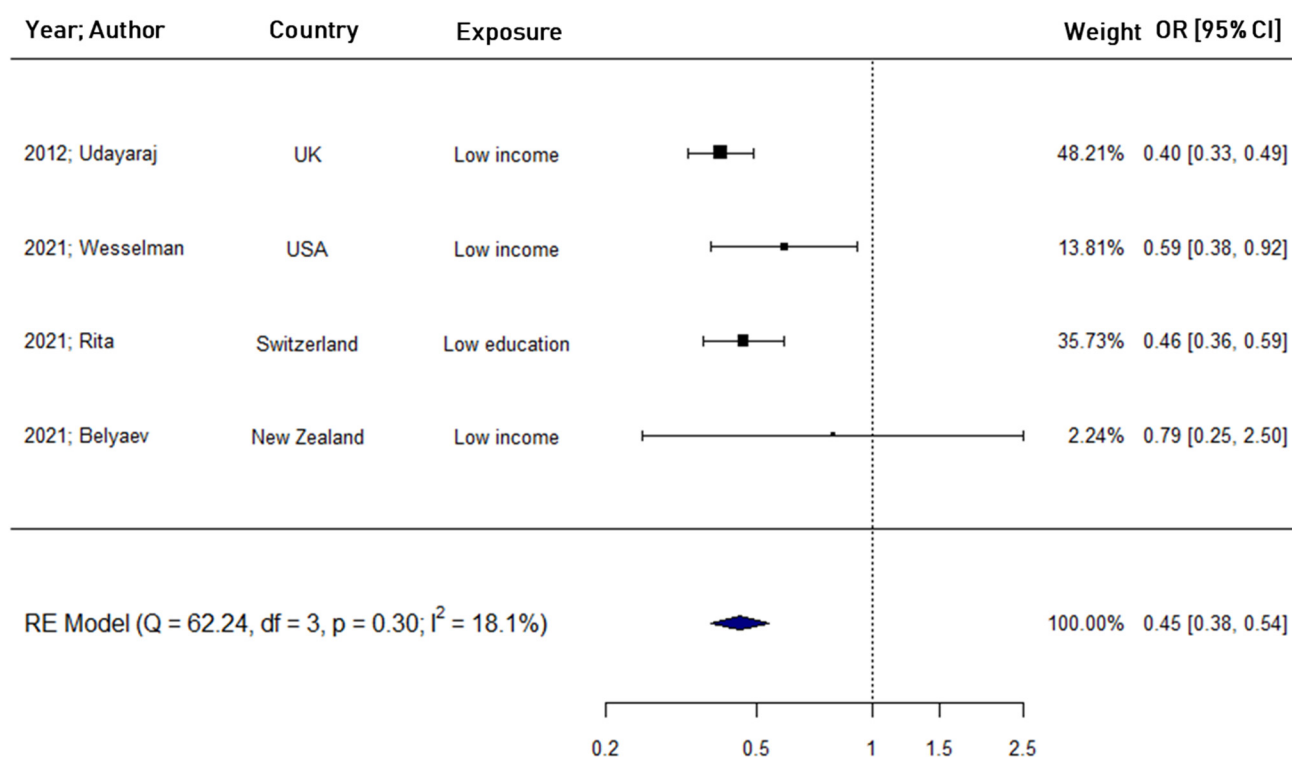

**Suppl. Figure S56.** Forest plot comparing low and high socioeconomic status patients (reference) regarding living-donor transplantation.

## 5.12. Deceased-donor transplantation

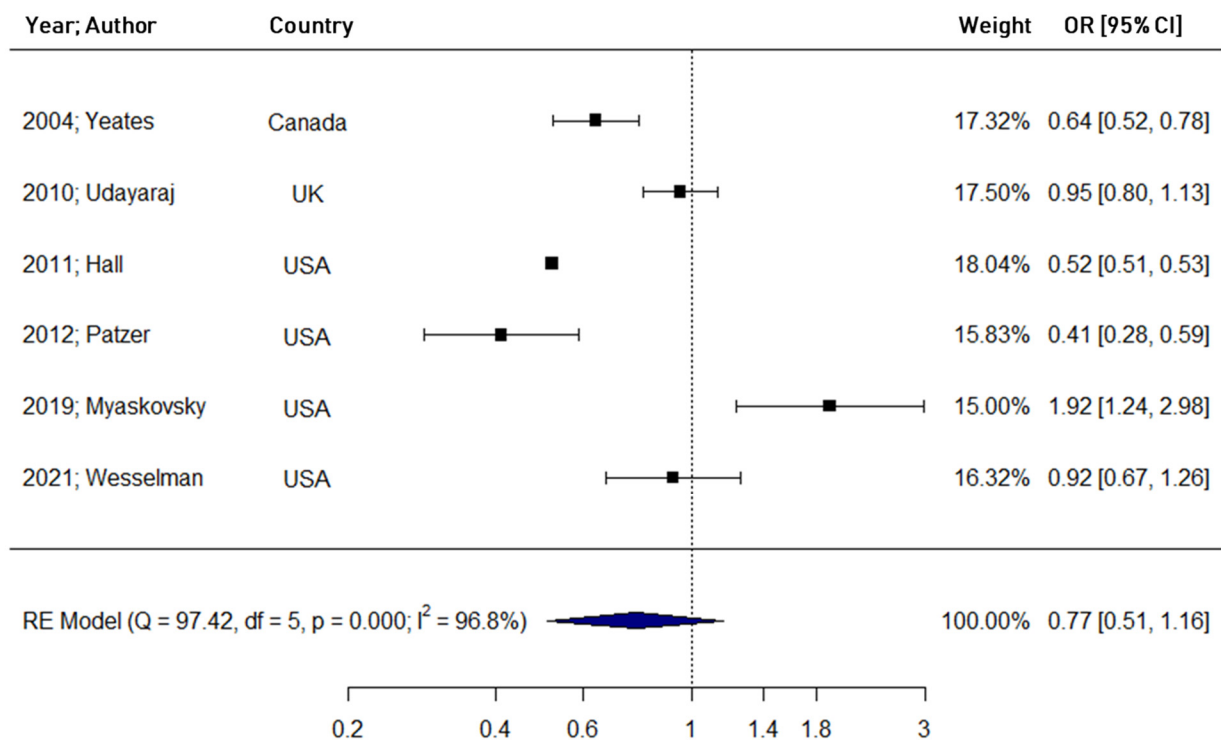

**Suppl. Figure S57.** Forest plot comparing Black and White patients (reference) regarding deceased-donor transplantation.

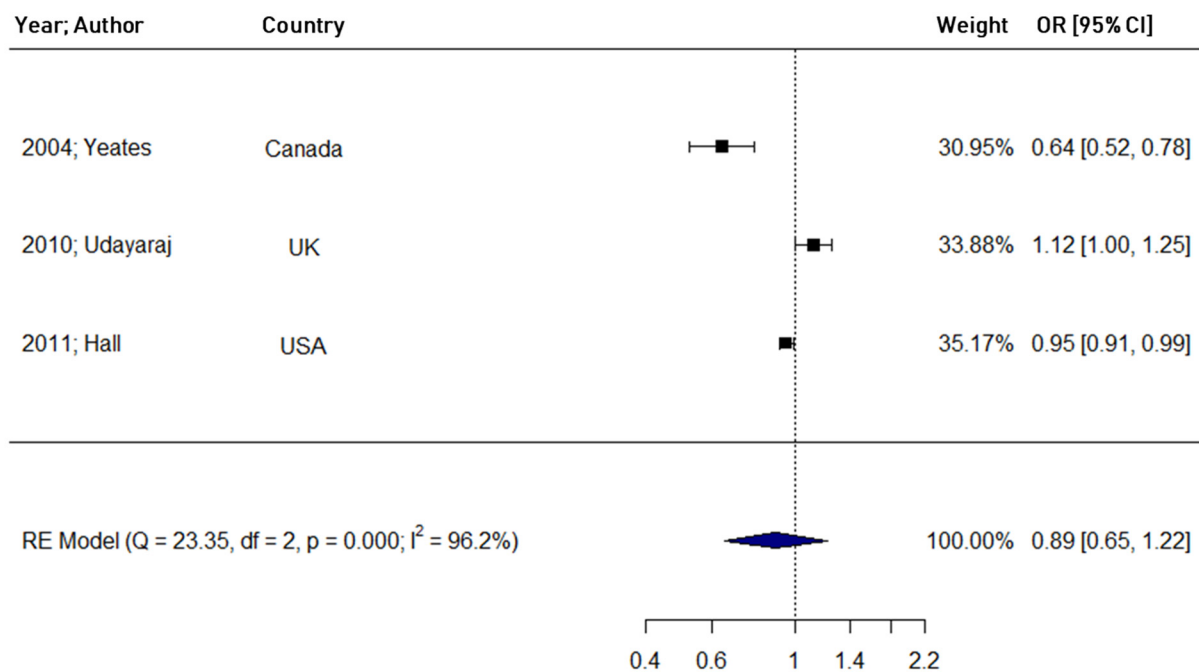

**Suppl. Figure S58.** Forest plot comparing Asian and White patients (reference) regarding deceased-donor transplantation.

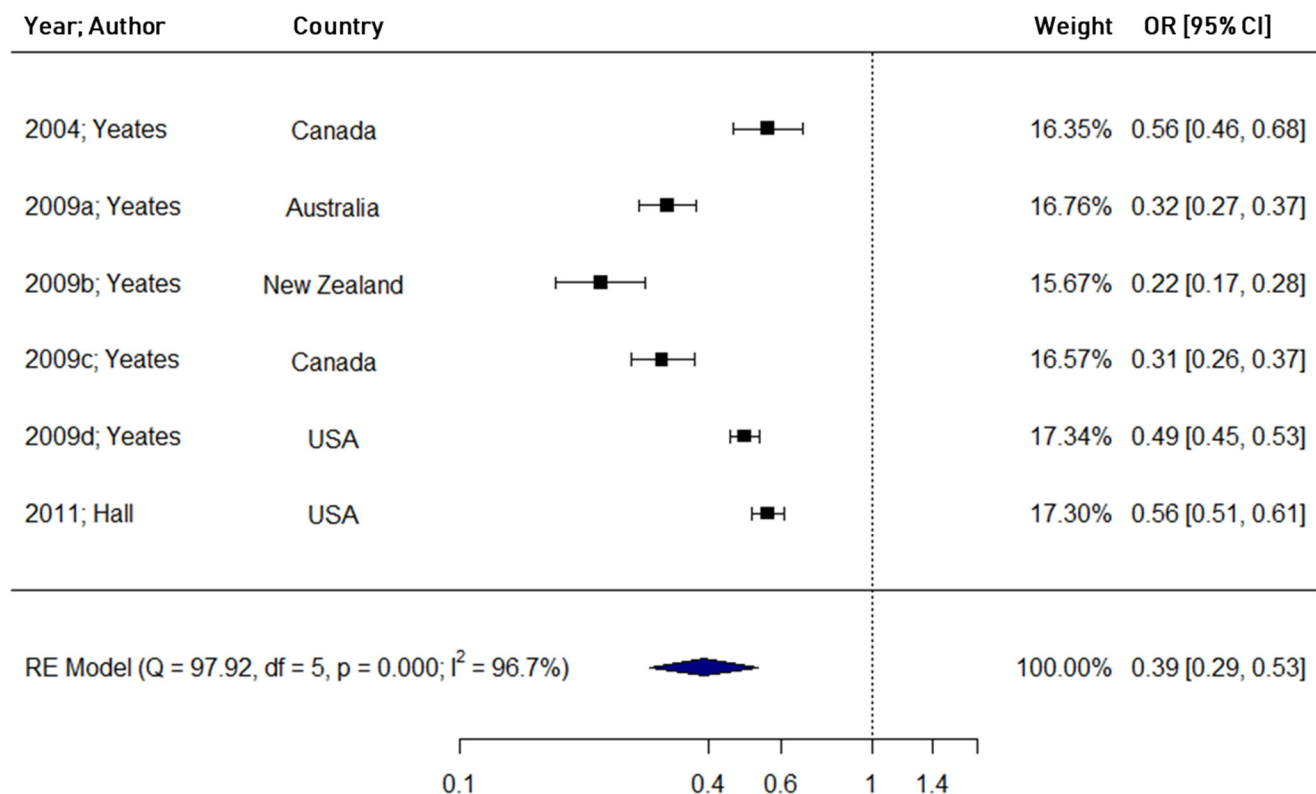

**Suppl. Figure S59.** Forest plot comparing Indigenous and White patients (reference) regarding deceased-donor transplantation.

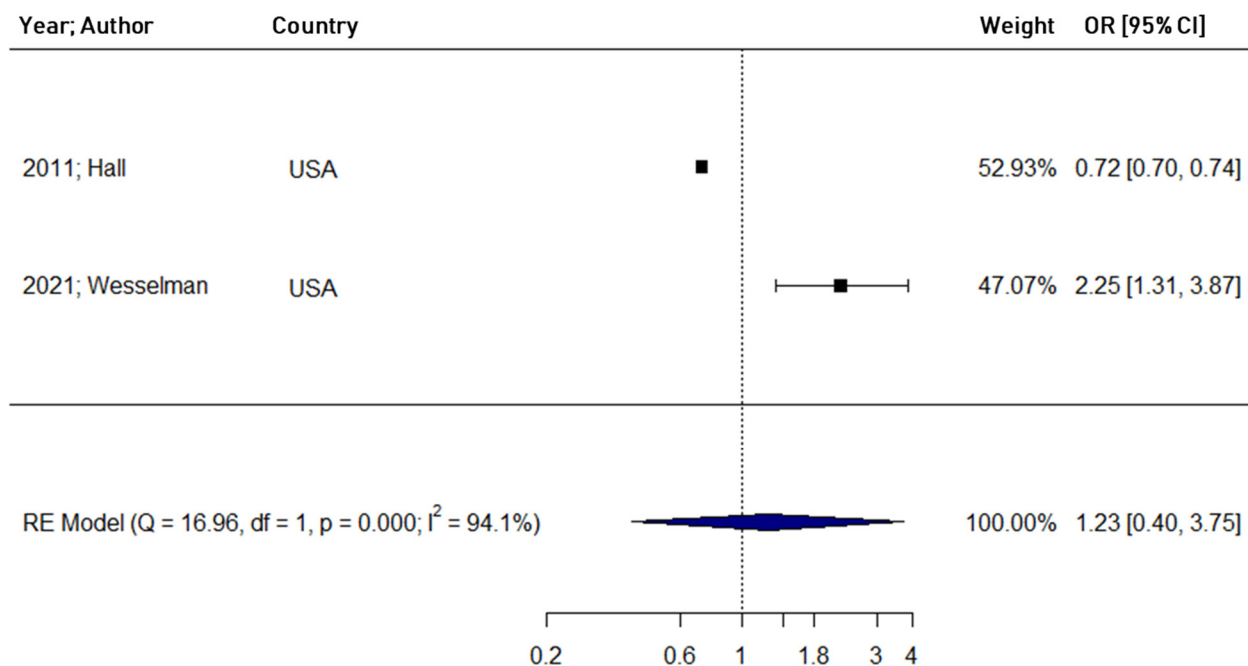

**Suppl. Figure S60.** Forest plot comparing Hispanic and White patients (reference) regarding deceased-donor transplantation.

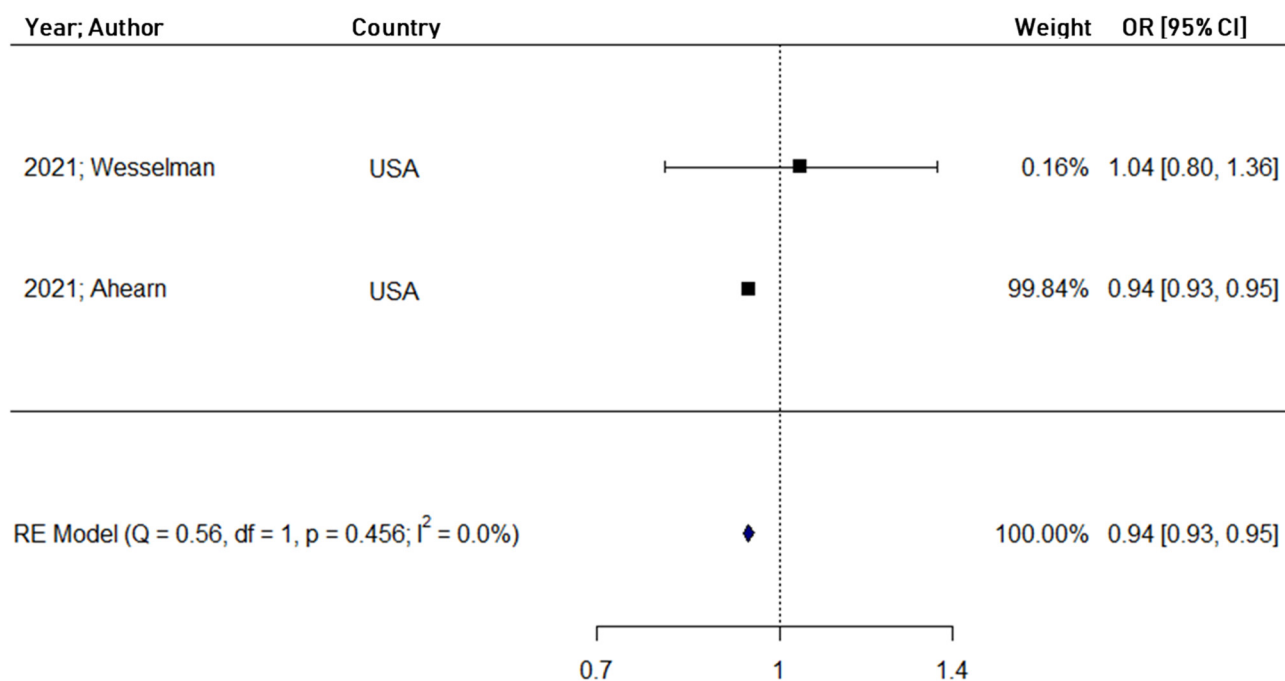

**Suppl. Figure S61.** Forest plot comparing female and male patients (reference) regarding deceased-donor transplantation.

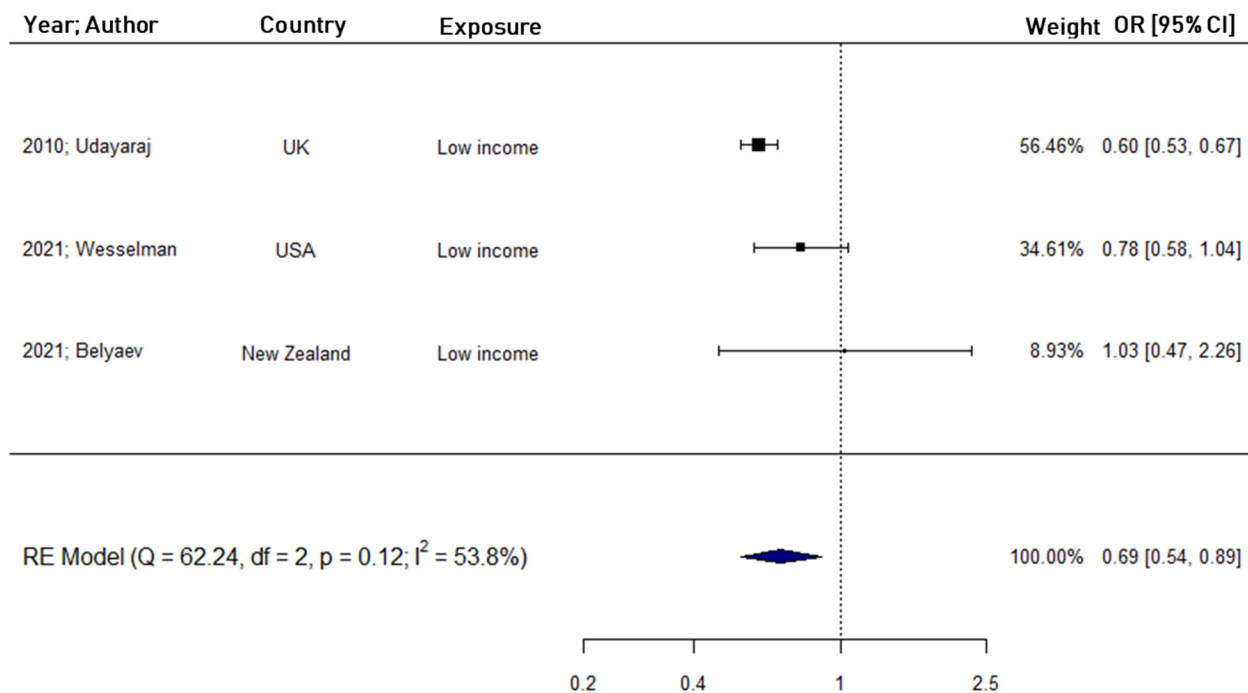

**Suppl. Figure S62.** Forest plot comparing low and high socioeconomic status patients (reference) regarding deceased-donor transplantation.

### 5.13. Preemptive transplantation

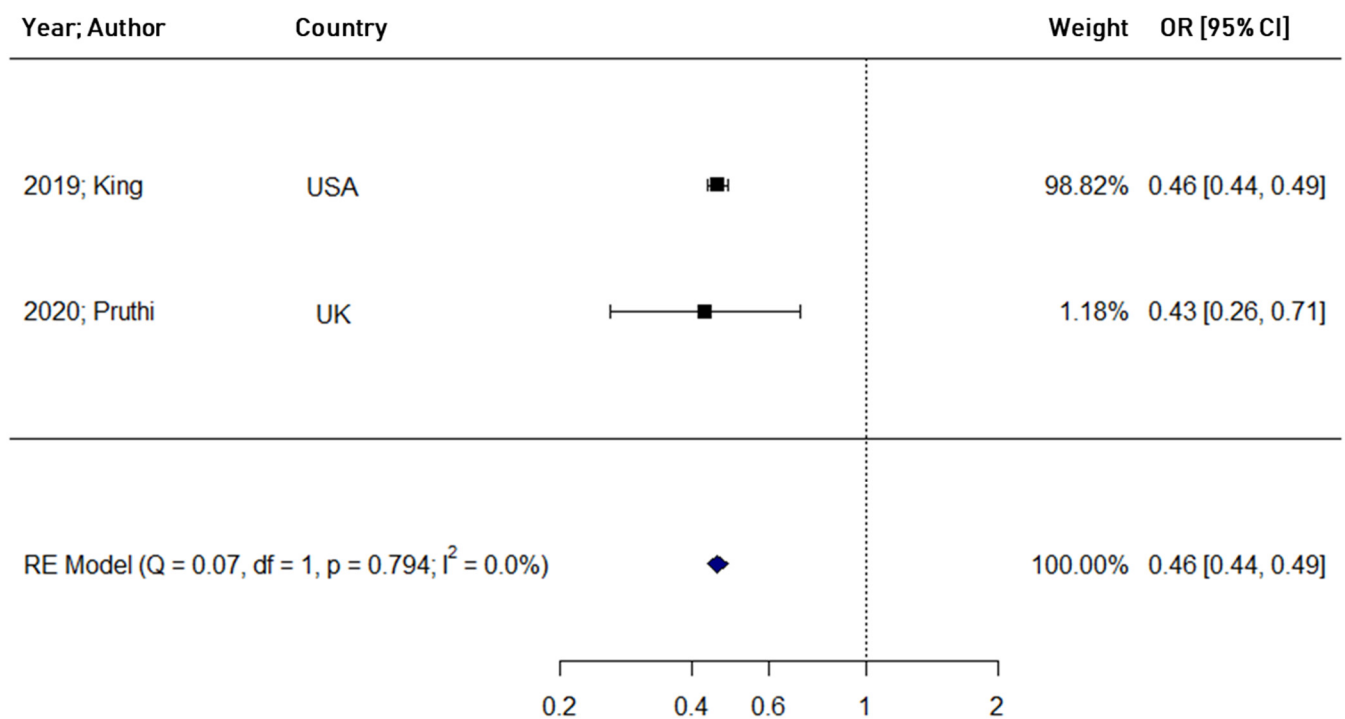

**Suppl. Figure S63.** Forest plot comparing Black and White patients (reference) regarding preemptive transplantation.

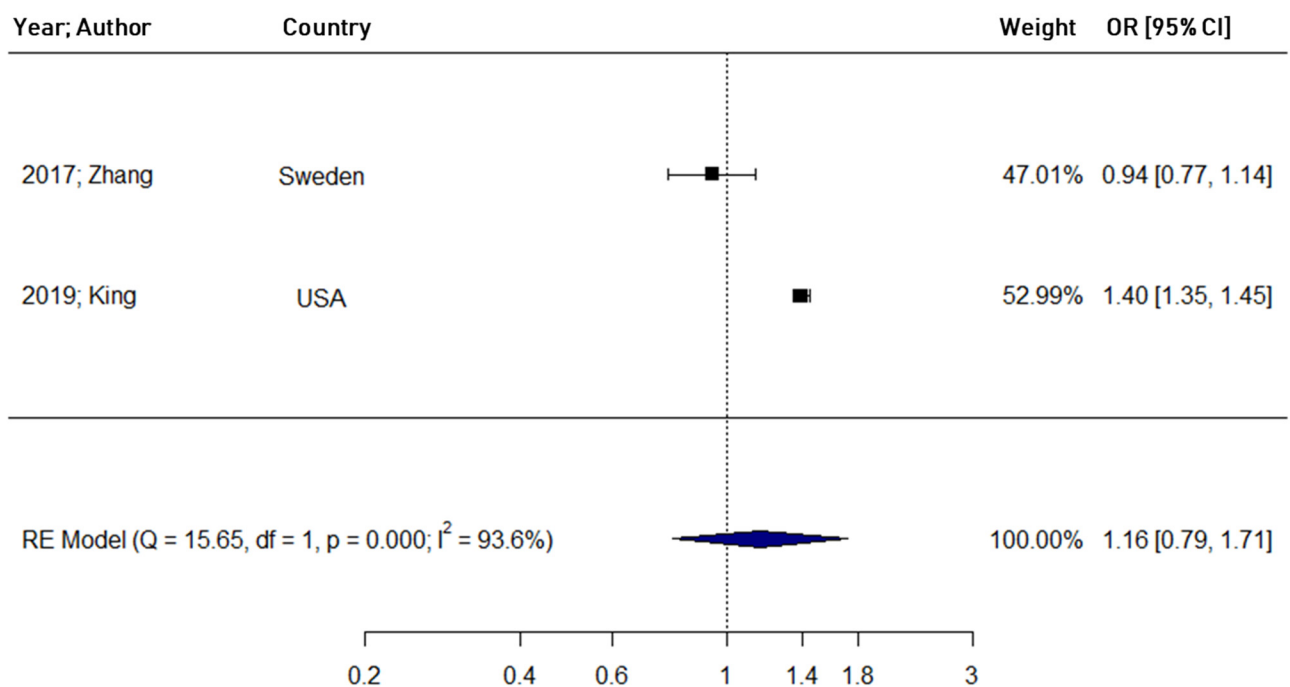

**Suppl. Figure S64.** Forest plot comparing female and male patients (reference) regarding preemptive transplantation.



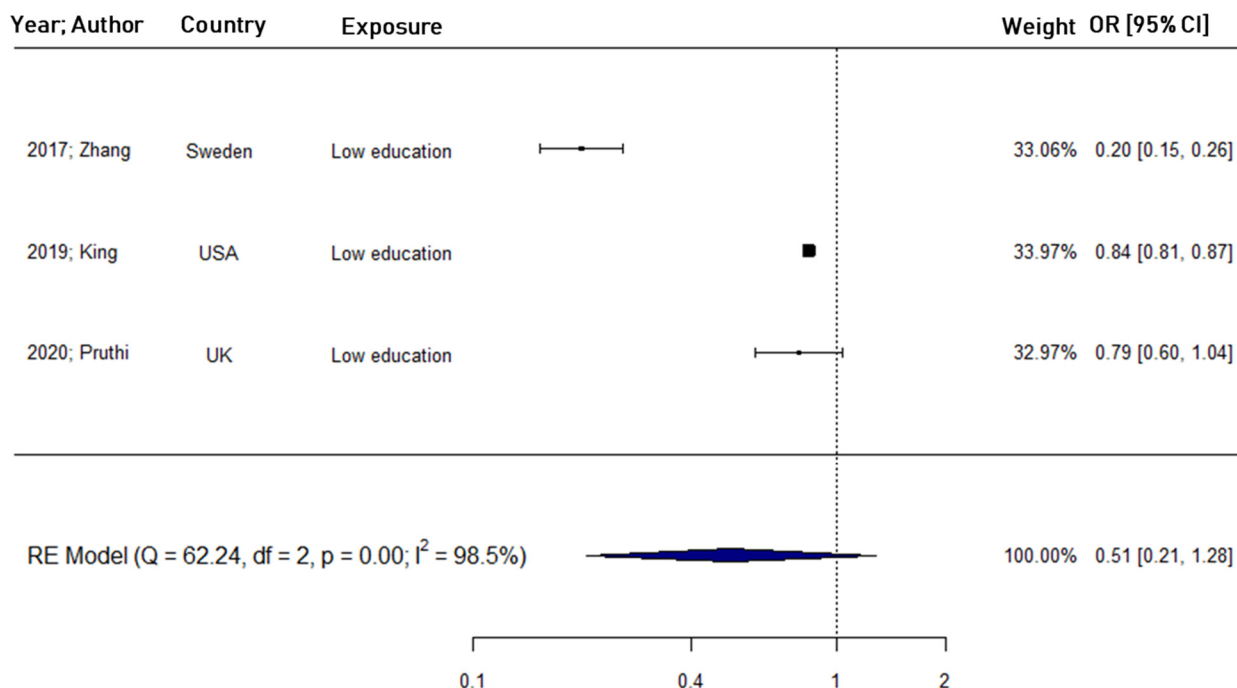

**Suppl. Figure S65.** Forest plot comparing low and high socioeconomic status patients (reference) regarding preemptive transplantation.

#### 5.14. Graft survival

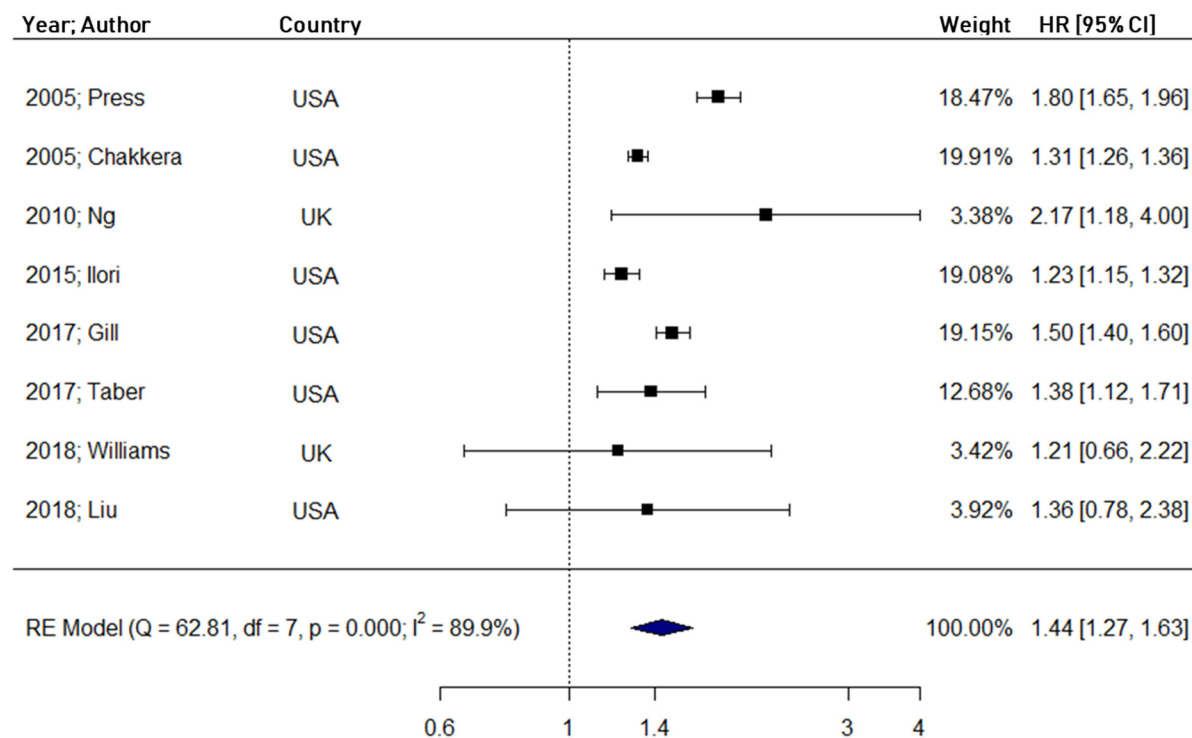

**Suppl. Figure S66.** Forest plot comparing Black and White patients (reference) regarding graft survival.

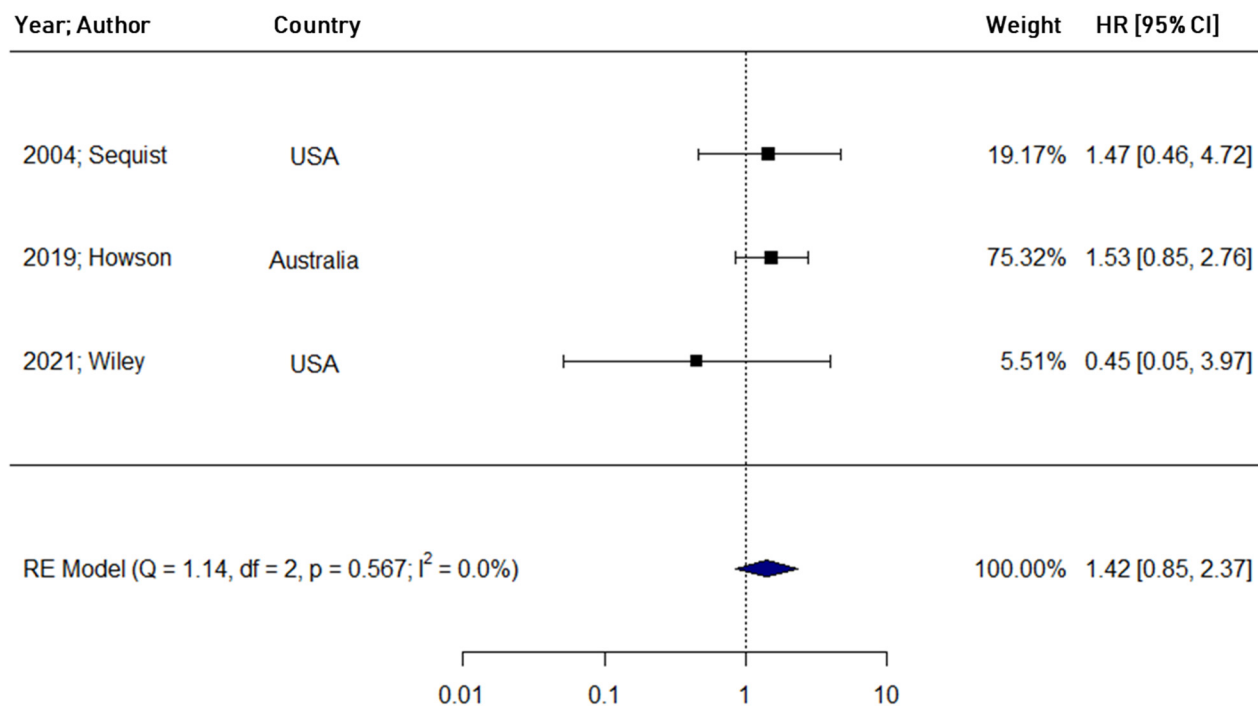

**Suppl. Figure S67.** Forest plot comparing Indigenous and White patients (reference) regarding graft survival.

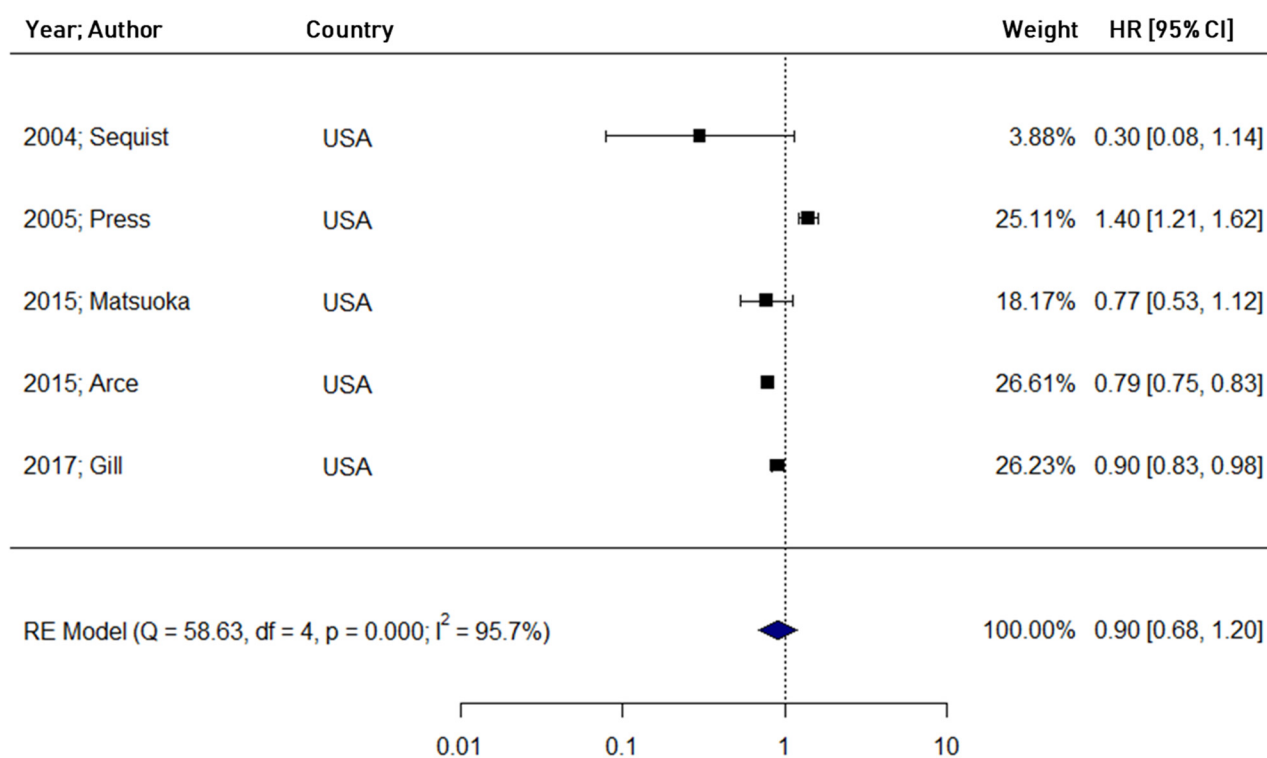

**Suppl. Figure S68.** Forest plot comparing Hispanic and White patients (reference) regarding graft survival.

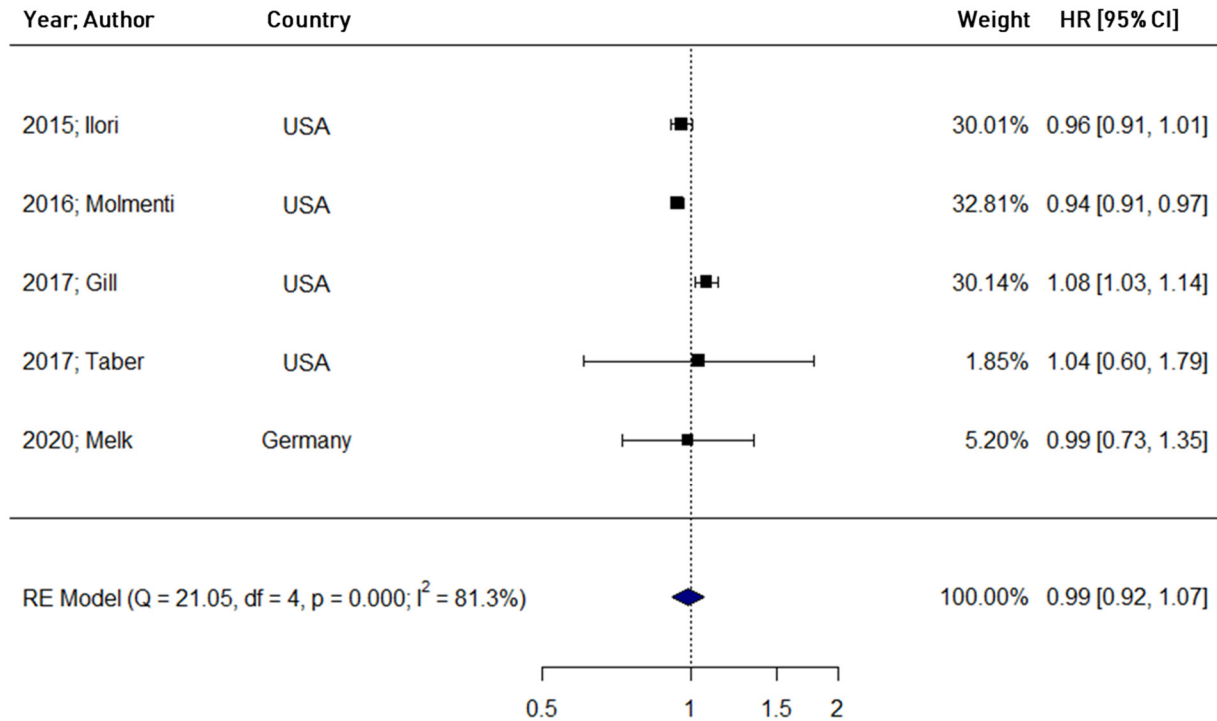

**Suppl. Figure S69.** Forest plot comparing female and male patients (reference) regarding n graft survival.

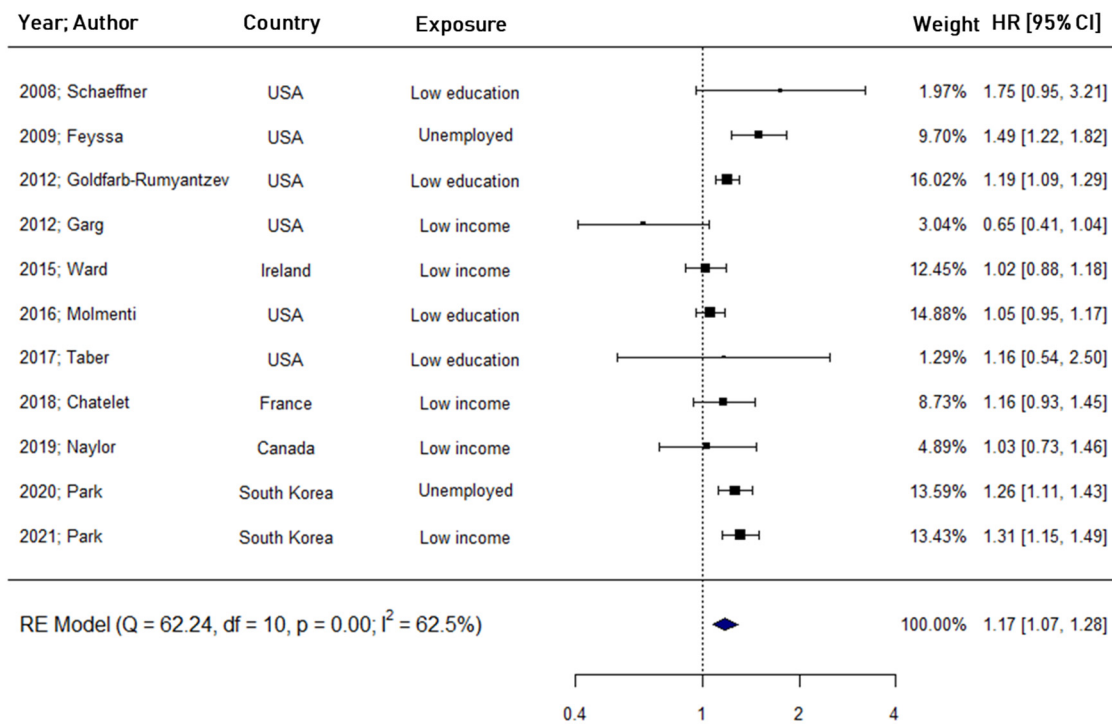

**Suppl. Figure S70.** Forest plot comparing low and high socioeconomic status patients (reference) regarding graft survival.

### 5.15. Kidney transplantation survival

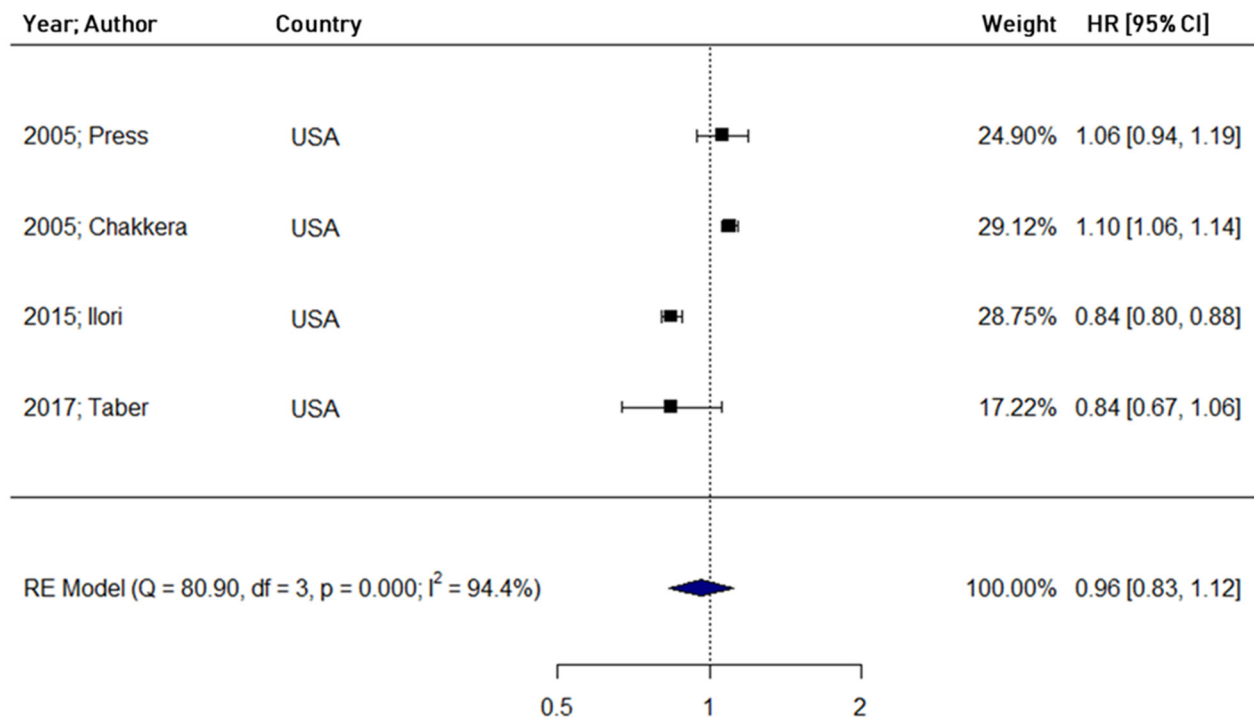

**Suppl. Figure S71.** Forest plot comparing Black and White patients (reference) regarding kidney transplantation survival.

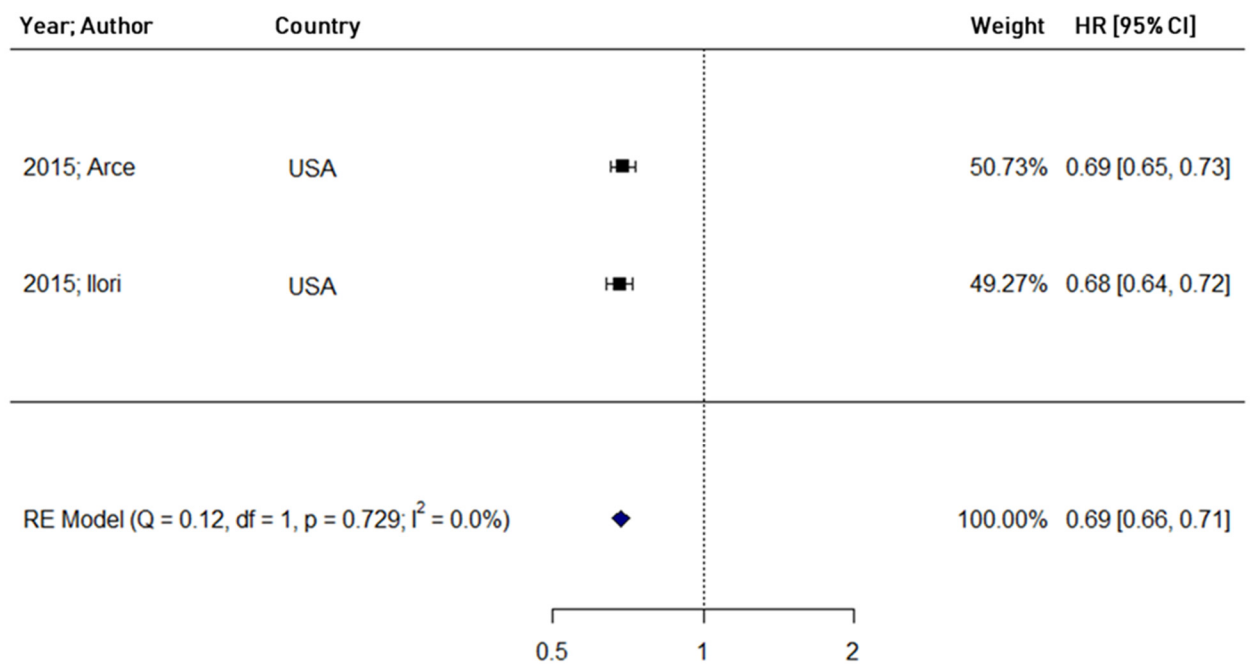

**Suppl. Figure S72.** Forest plot comparing Hispanic and White patients (reference) regarding kidney transplantation survival.

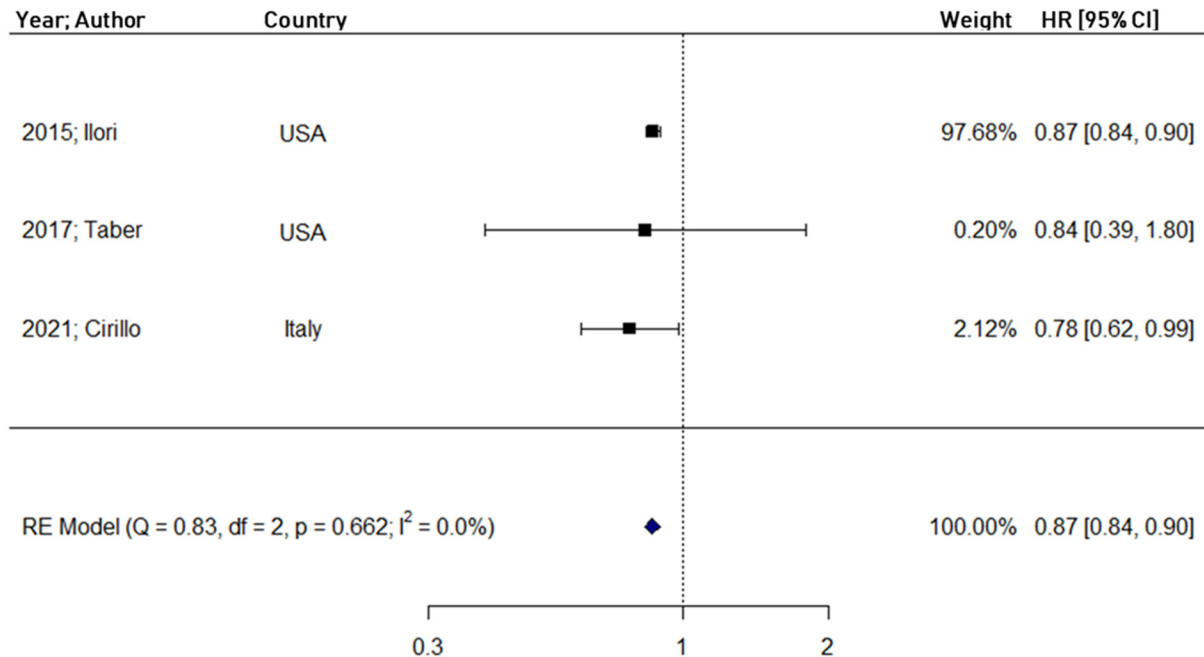

**Suppl. Figure S73.** Forest plot comparing female and male patients (reference) regarding kidney transplantation survival.

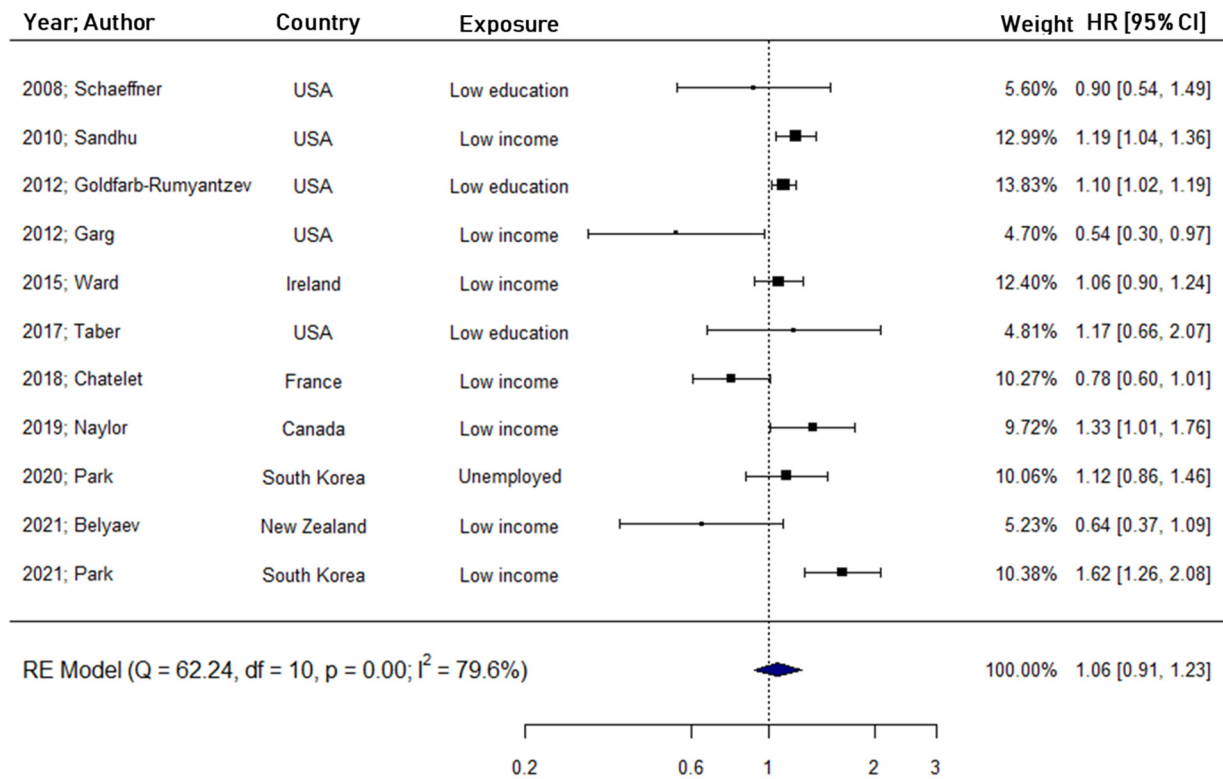

**Suppl. Figure S74.** Forest plot comparing low and high socioeconomic status patients (reference) regarding kidney transplantation survival.

## Supplementary S6: Funnel plots

### 6.1. Arteriovenous fistula/graft vs. Central venous catheter

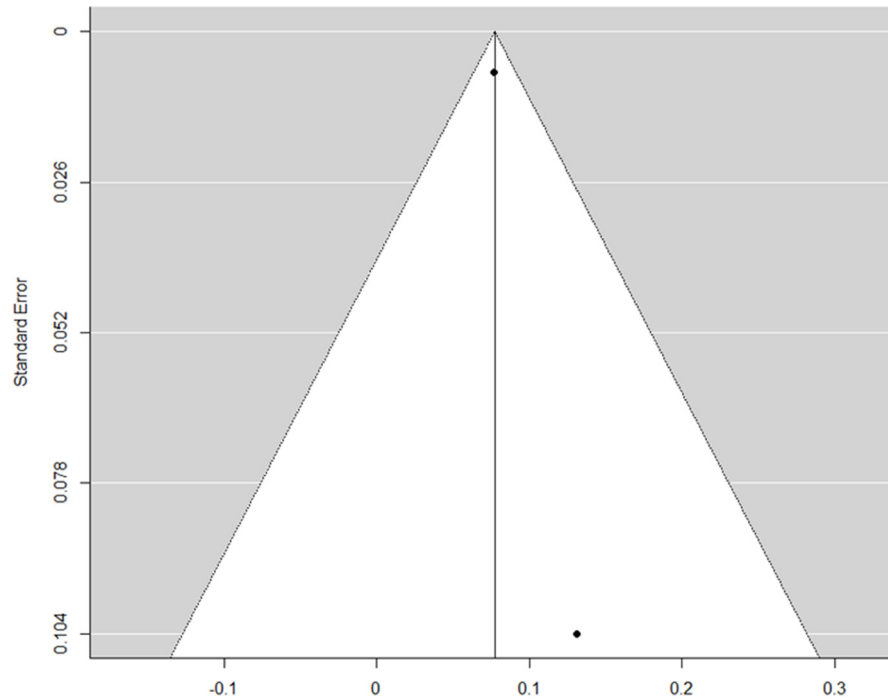

**Suppl. Figure S75.** Funnel plot comparing Black and White patients (reference) regarding dialysis initiation with arteriovenous fistula or graft.

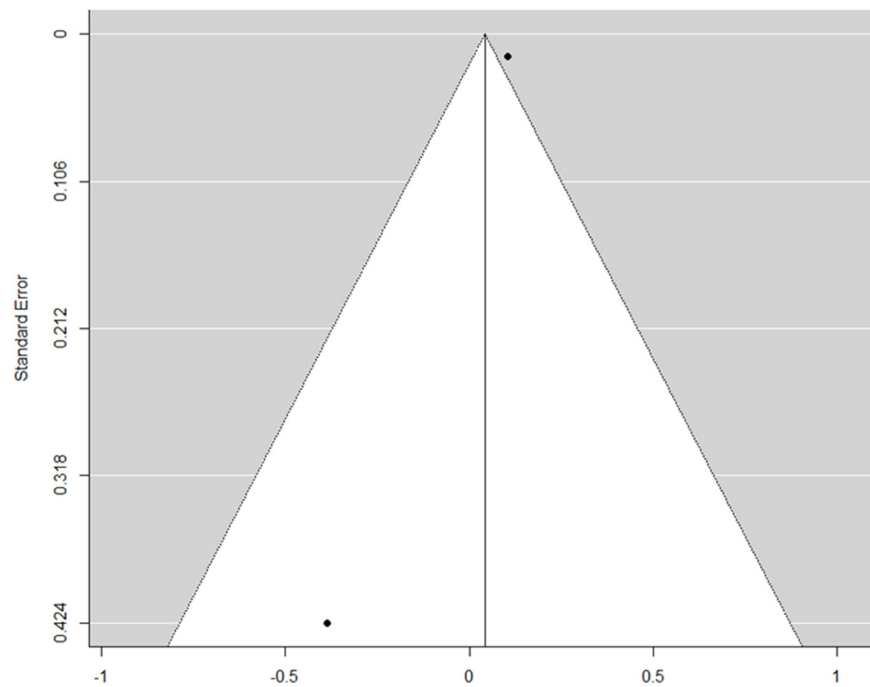

**Suppl. Figure S76.** Funnel plot comparing Asian and White patients (reference) regarding dialysis initiation with arteriovenous fistula or graft.

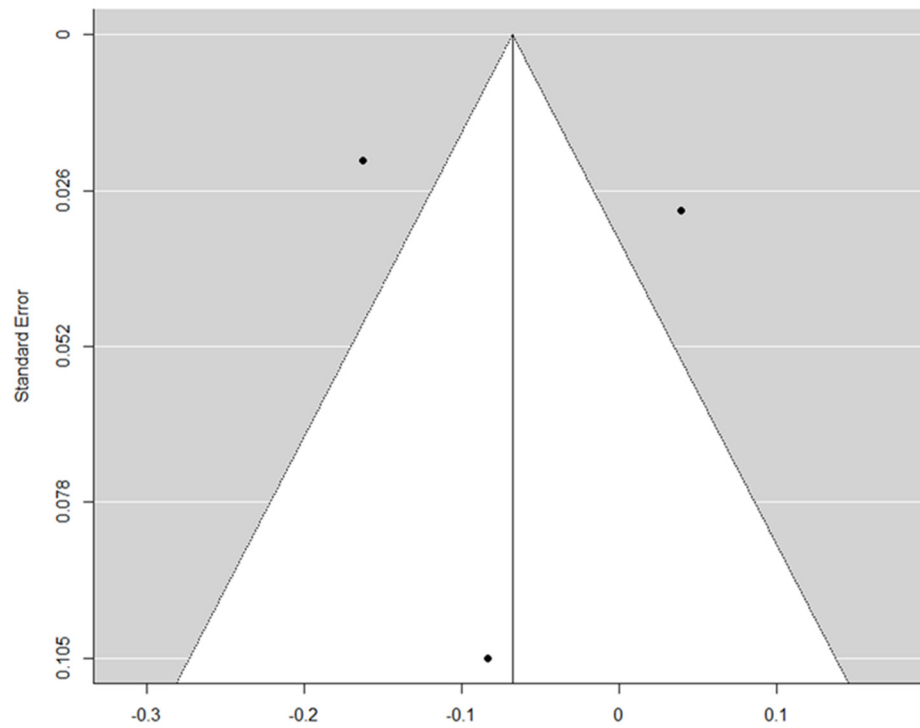

**Suppl. Figure S77.** Funnel plot comparing Indigenous and White patients (reference) regarding dialysis initiation with arteriovenous fistula or graft.

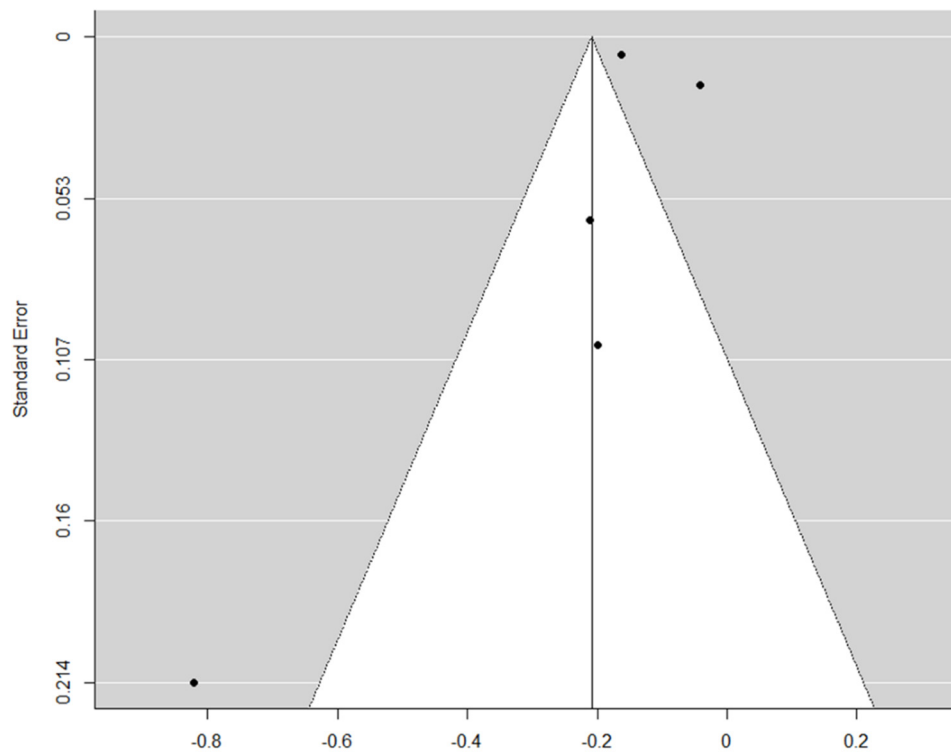

**Suppl. Figure S78.** Funnel plot of female patients (reference) and dialysis initiation with arteriovenous fistula or graft.

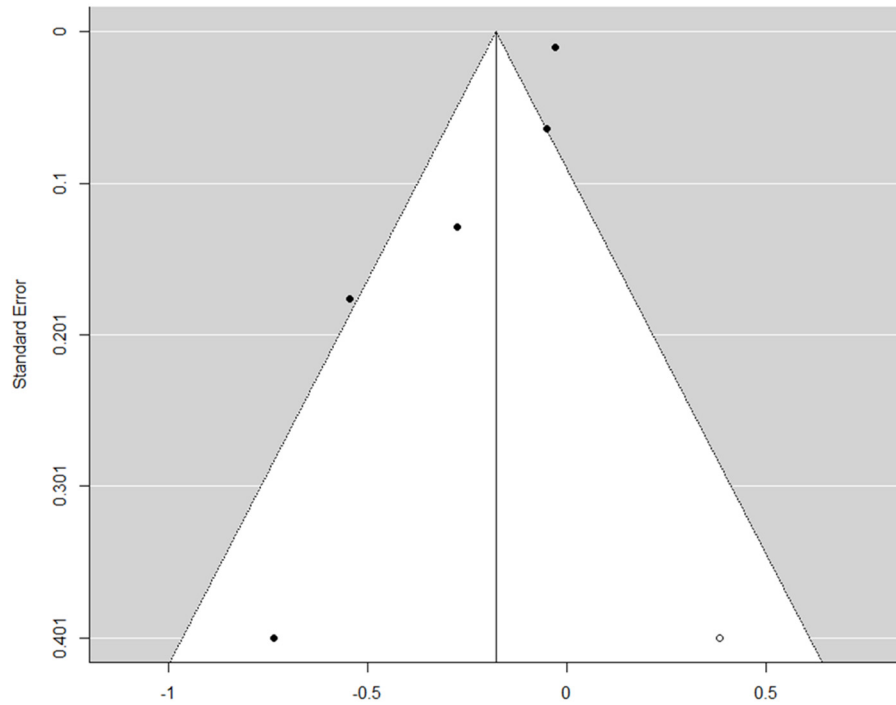

**Suppl. Figure S79.** Funnel plot comparing low and high socioeconomic status patients (reference) regarding dialysis initiation with arteriovenous fistula or graft.

## 6.2. Arteriovenous fistula vs. Arteriovenous graft

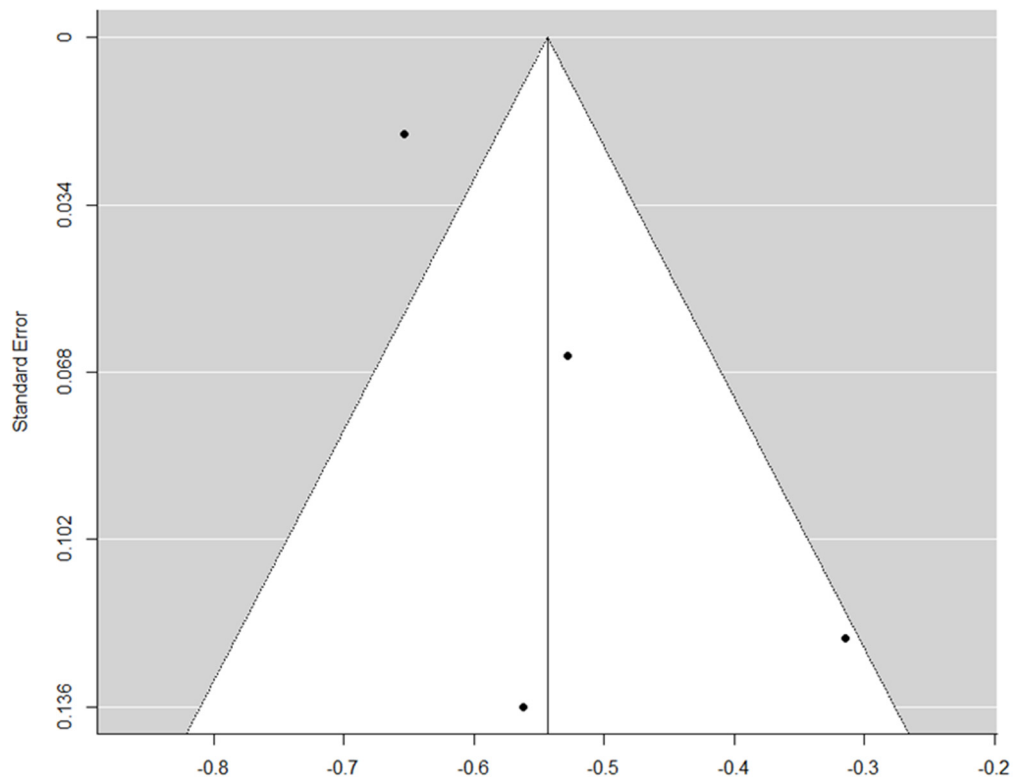

**Suppl. Figure S80.** Funnel plot comparing Black and White patients (reference) regarding dialysis initiation with arteriovenous fistula vs. arteriovenous graft.



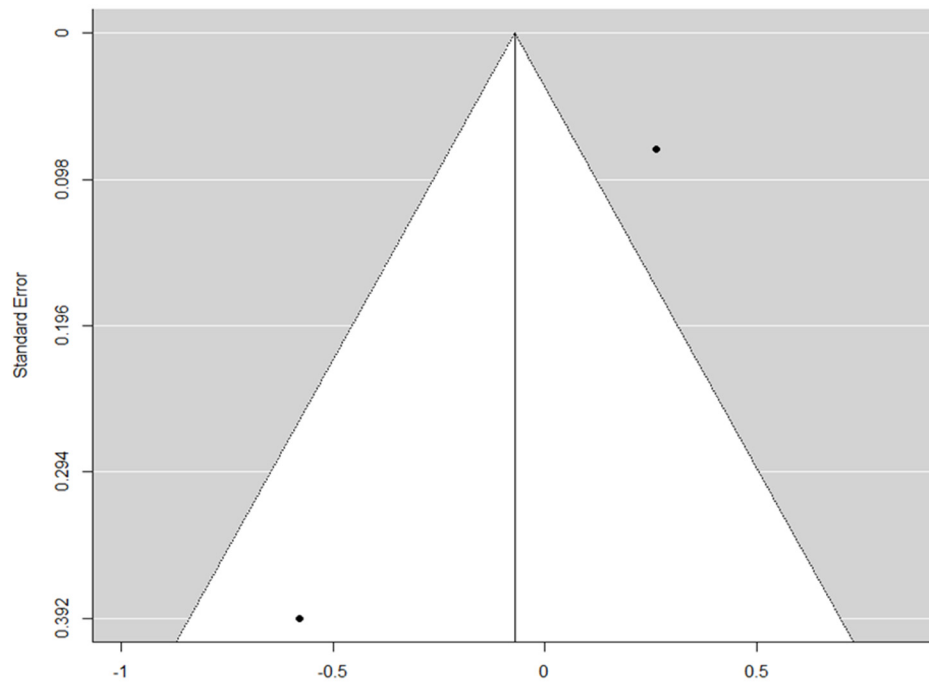

**Suppl. Figure S81.** Funnel plot comparing Indigenous and White patients (reference) regarding dialysis initiation with arteriovenous fistula vs. arteriovenous graft.

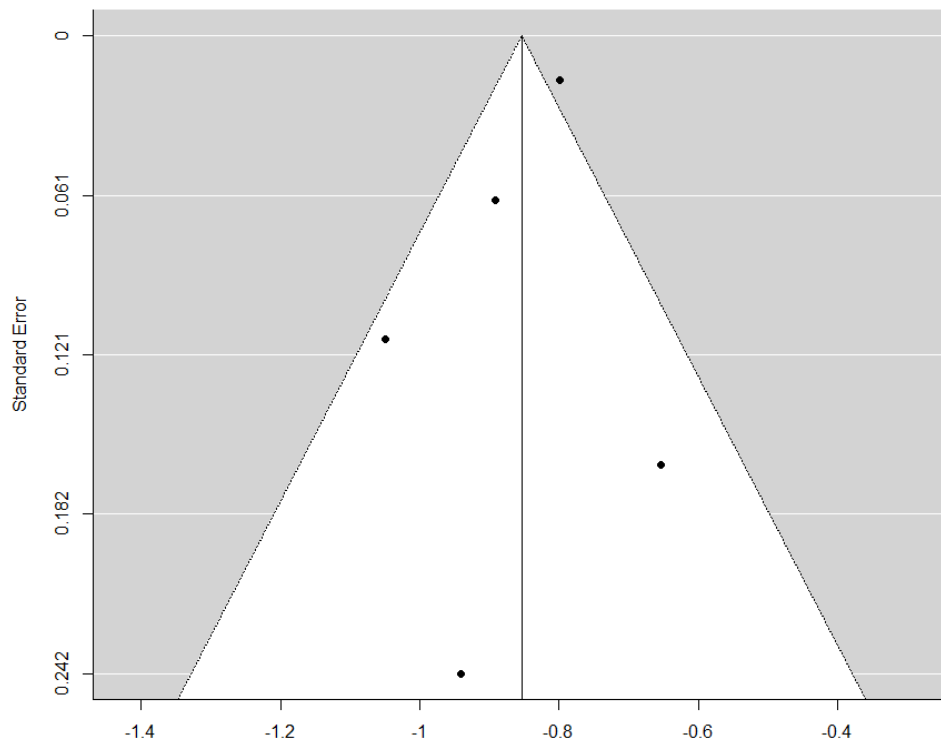

**Suppl. Figure S82.** Funnel plot of female patients (reference) and dialysis initiation with arteriovenous fistula vs. arteriovenous graft.

### 6.3. Successful arteriovenous fistula use

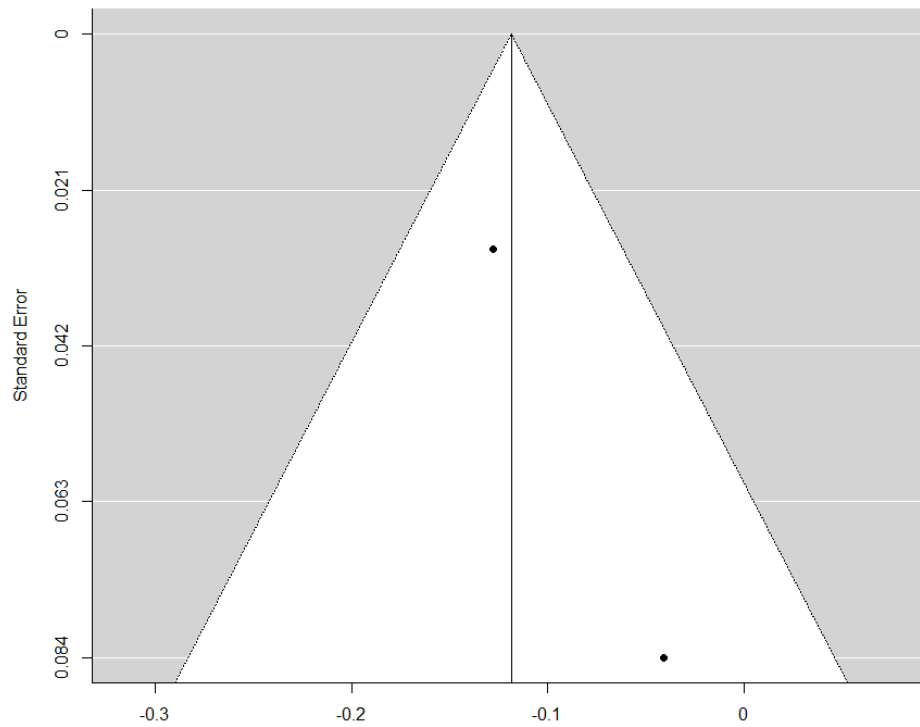

**Suppl. Figure S83.** Funnel plot comparing Black and White patients (reference) regarding successful arteriovenous fistula use.

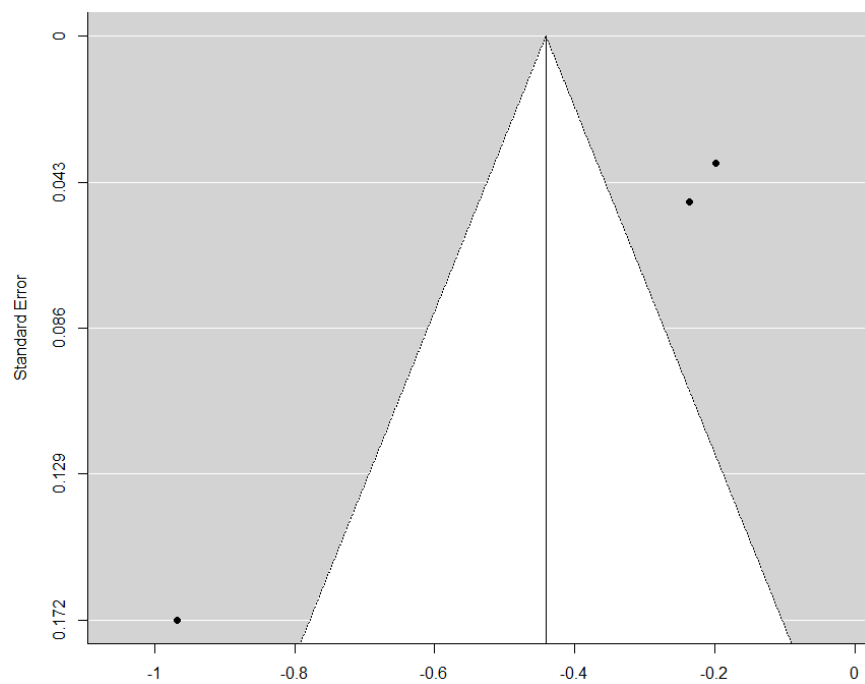

**Suppl. Figure S84.** Funnel plot of female patients (reference) and successful arteriovenous fistula.

**6.4. Primary arteriovenous fistula patency**

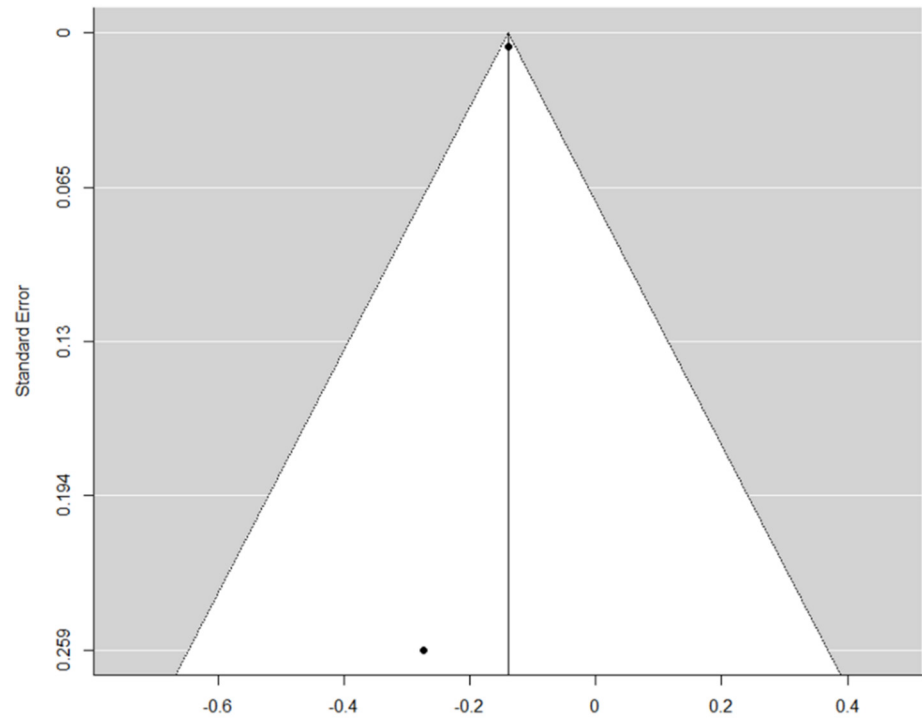

**Suppl. Figure S85.** Funnel plot comparing Black and White patients (reference) regarding primary arteriovenous fistula patency.

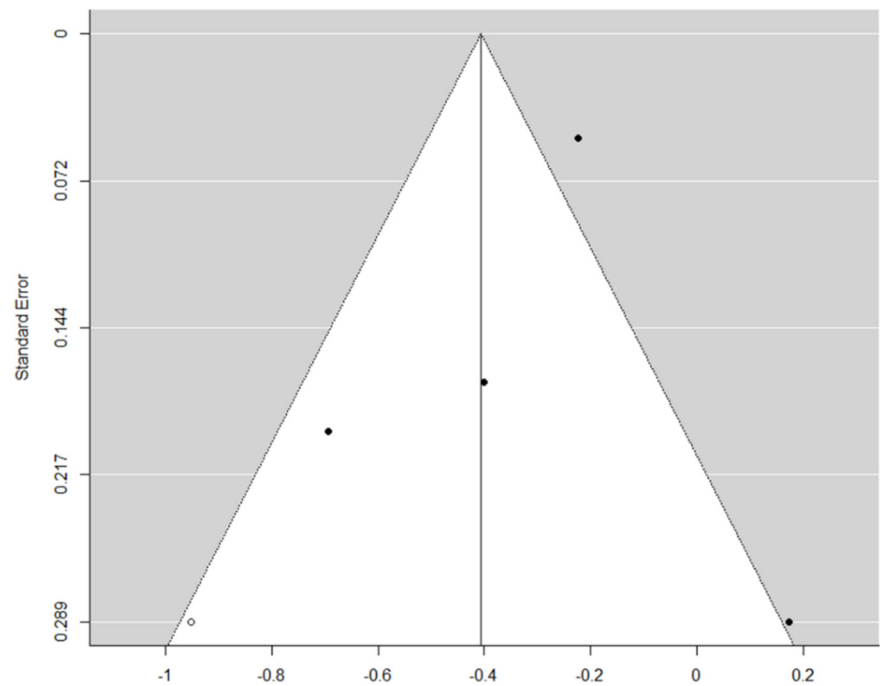

**Suppl. Figure S86.** Funnel plot of female patients (reference) and primary arteriovenous fistula patency.

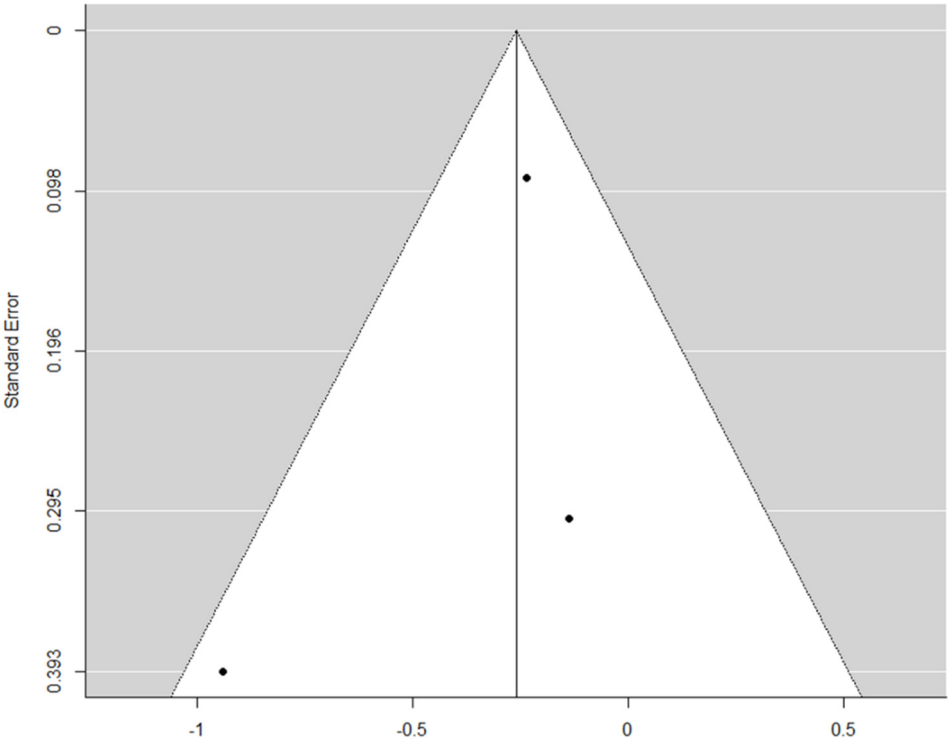

**Suppl. Figure S87.** Funnel plot comparing low and high socioeconomic status patients (reference) regarding primary arteriovenous fistula patency.

**6.5. Transition from central venous catheter to arteriovenous fistula/graft**

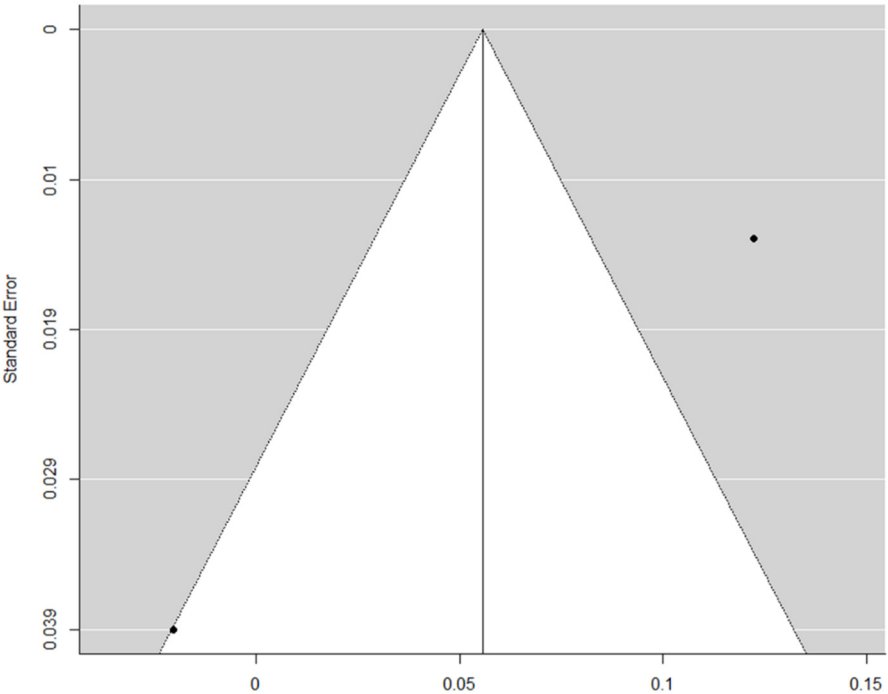

**Suppl. Figure S88.** Funnel plot comparing Black and White patients (reference) regarding the transition from central venous catheter to arteriovenous fistula/graft.

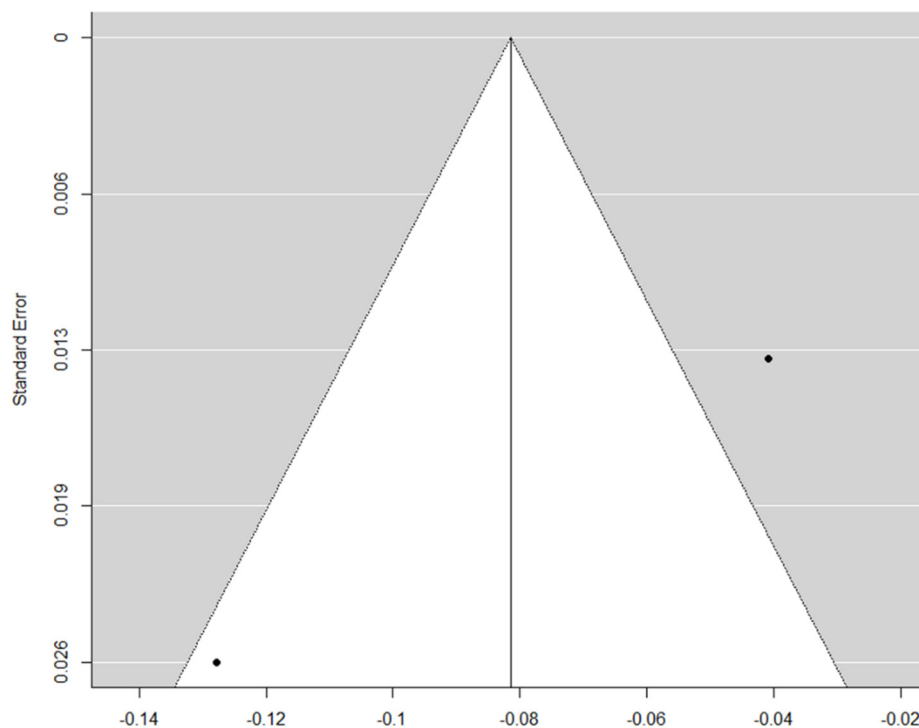

**Suppl. Figure S89.** Funnel plot of female patients (reference) and the transition from central venous catheter to arteriovenous fistula/graft.

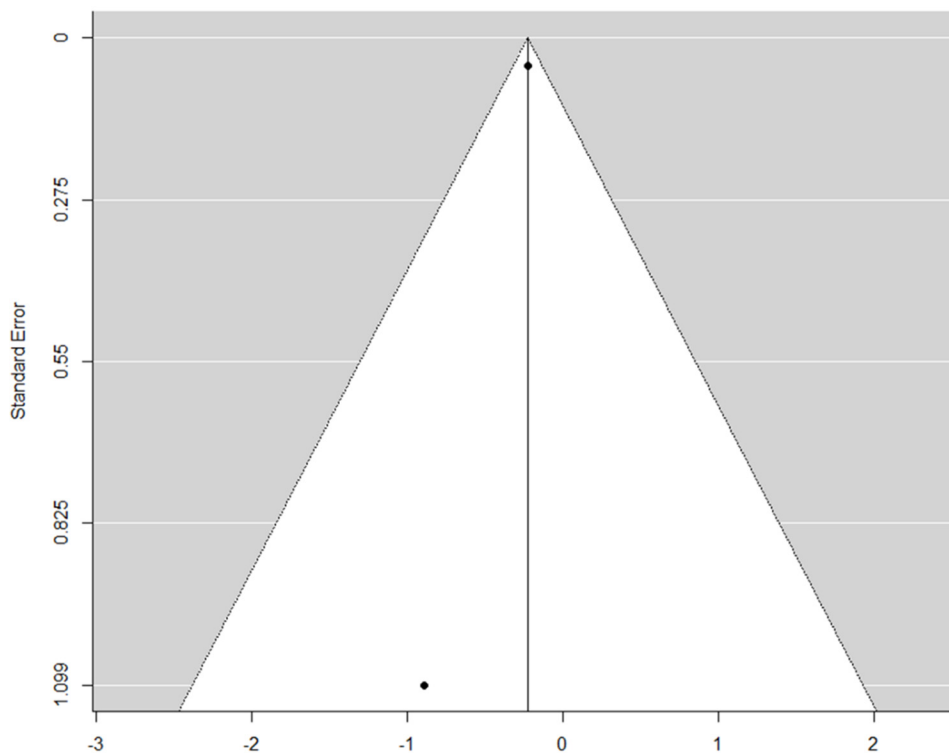

**Suppl. Figure S90.** Funnel plot comparing low and high socioeconomic status patients (reference) regarding the transition from central venous catheter to arteriovenous fistula/graft.

## 6.6. Home dialysis

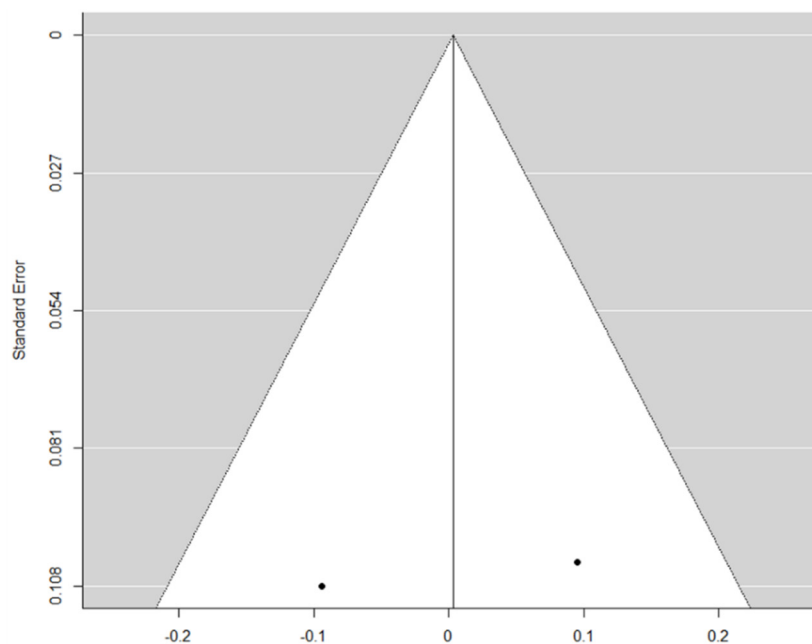

**Suppl. Figure S91.** Funnel plot comparing Black and White patients (reference) regarding home dialysis.

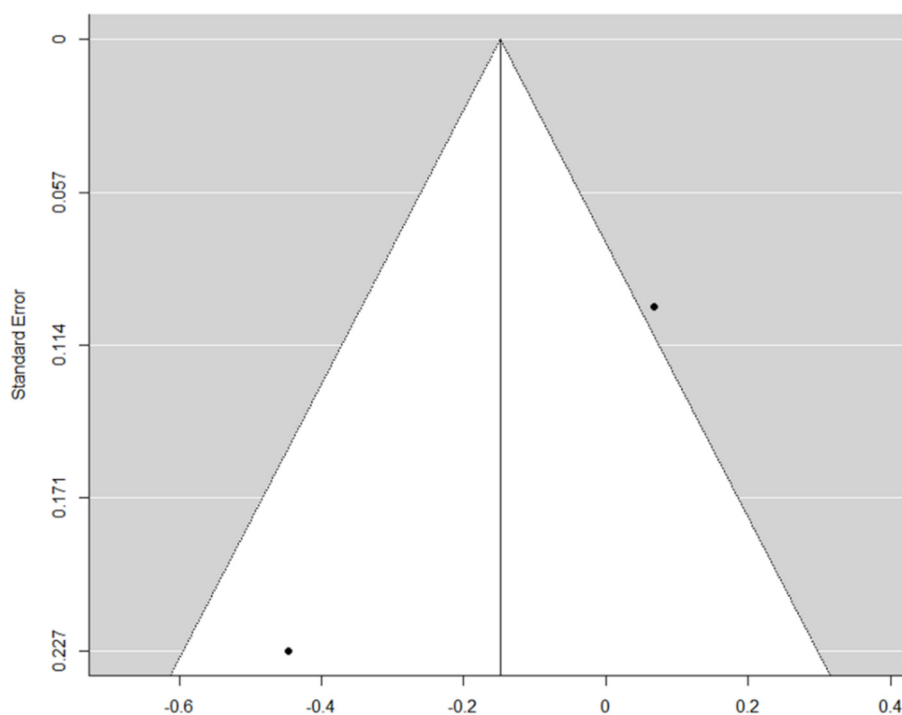

**Suppl. Figure S92.** Funnel plot comparing Asian and White patients (reference) regarding home dialysis.

### 6.7. Peritoneal dialysis

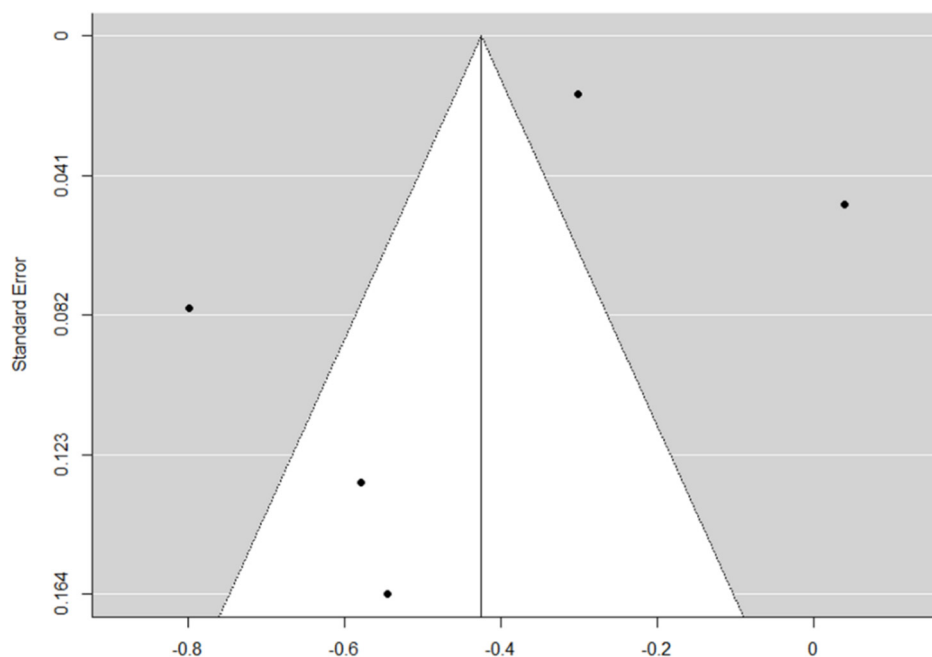

**Suppl. Figure S93.** Funnel plot comparing Black and White patients (reference) regarding peritoneal dialysis use.

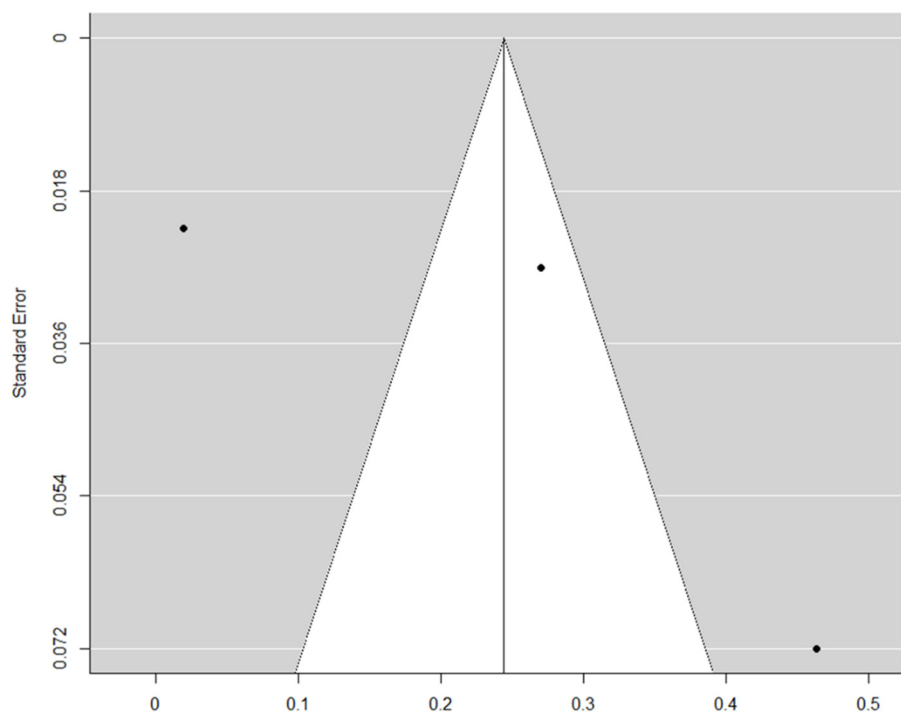

**Suppl. Figure S94.** Funnel plot comparing Asian and White patients (reference) regarding peritoneal dialysis use.

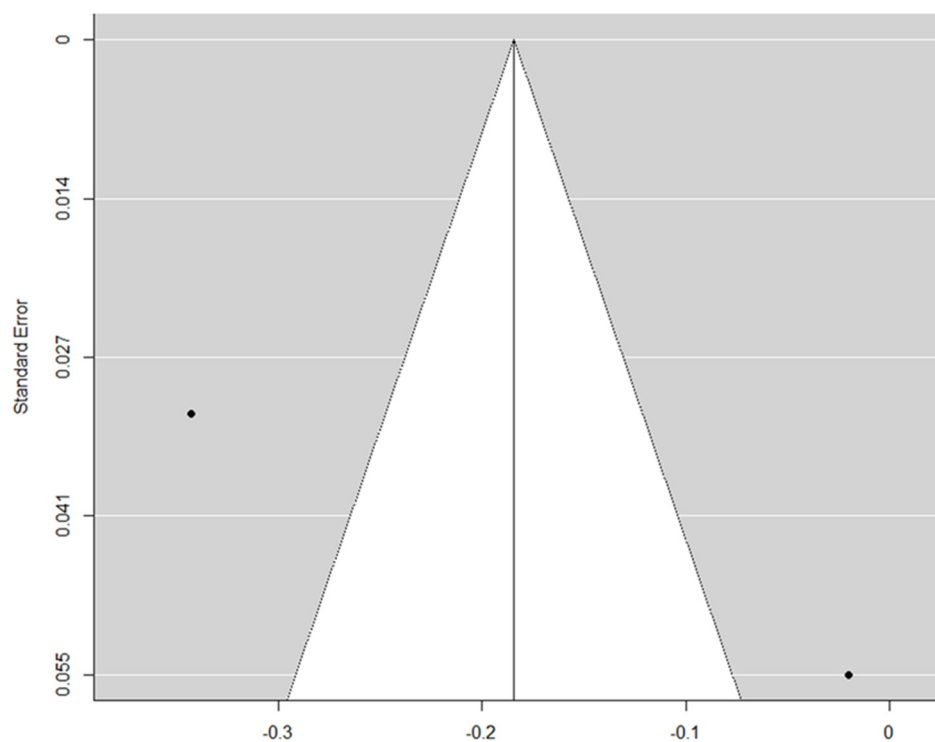

**Suppl. Figure S95.** Funnel plot comparing Indigenous and White patients (reference) regarding peritoneal dialysis use.



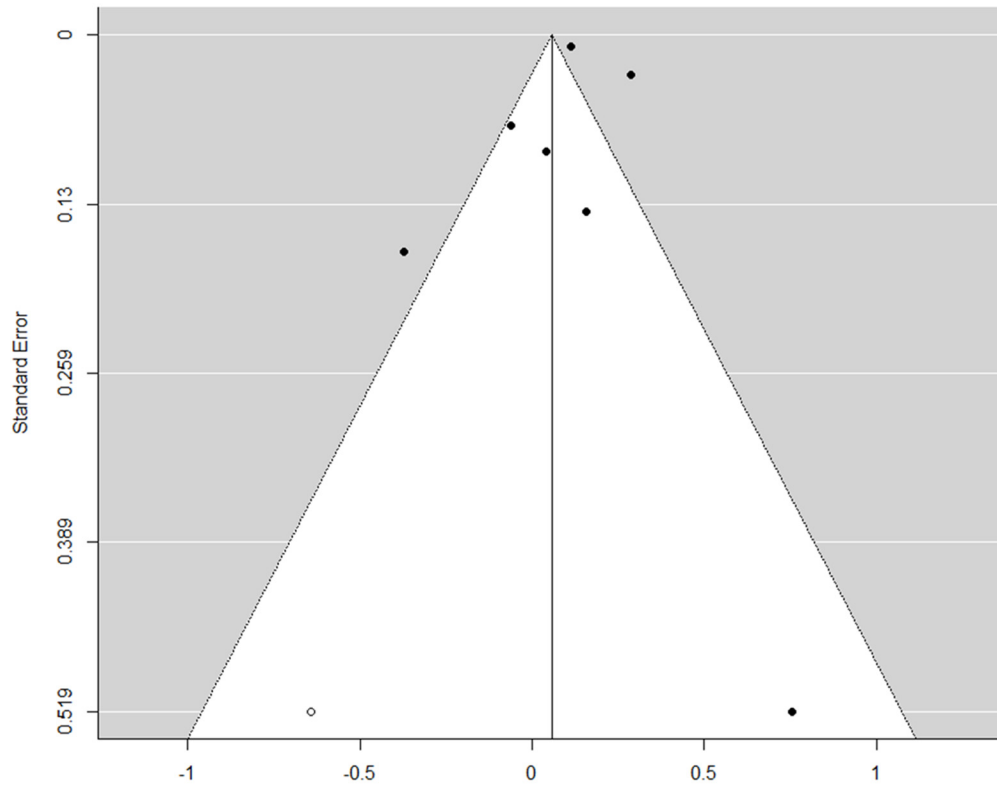

**Suppl. Figure S96.** Funnel plot of female patients (reference) and peritoneal dialysis use.

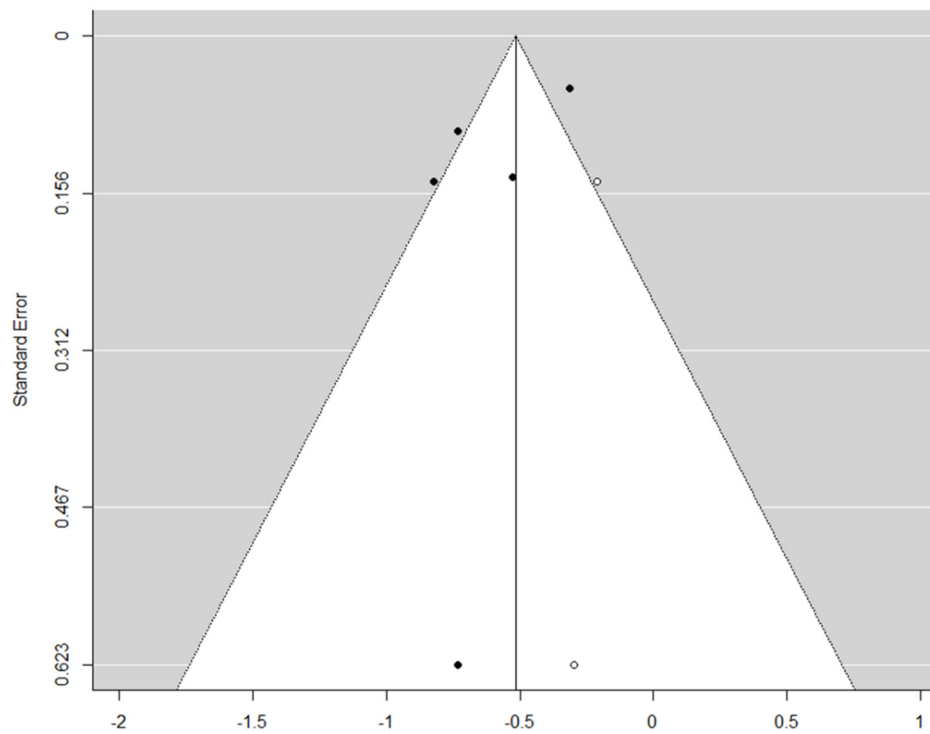

**Suppl. Figure S97.** Funnel plot comparing low and high socioeconomic status patients (reference) regarding peritoneal dialysis use.

## 6.8. Dialysis survival

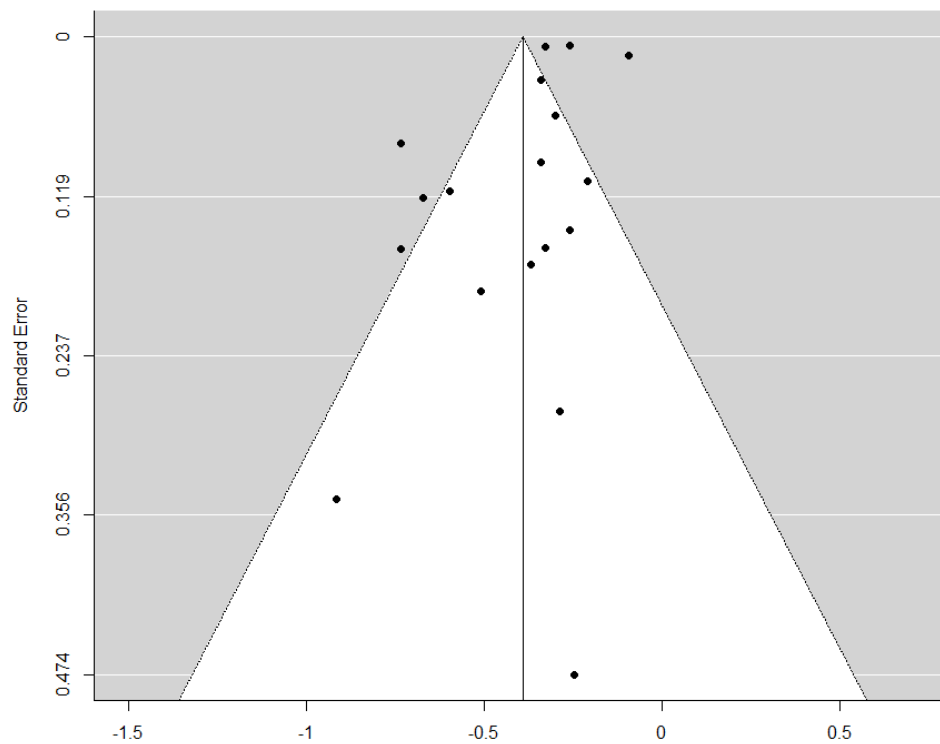

**Suppl. Figure S98.** Funnel plot comparing Black and White patients (reference) regarding dialysis mortality.

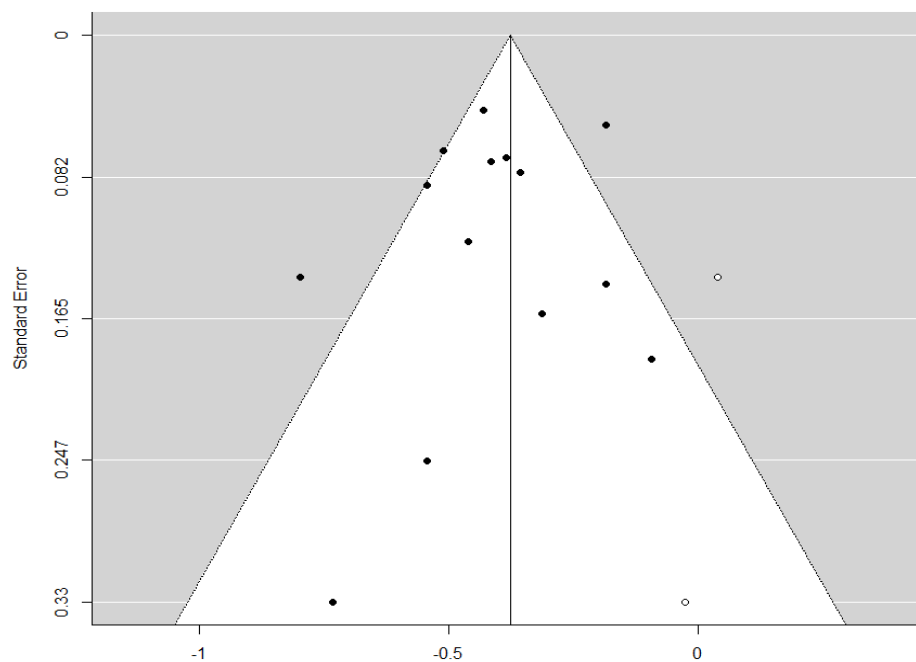

**Suppl. Figure S99.** Funnel plot comparing Asian and White patients (reference) regarding dialysis mortality.

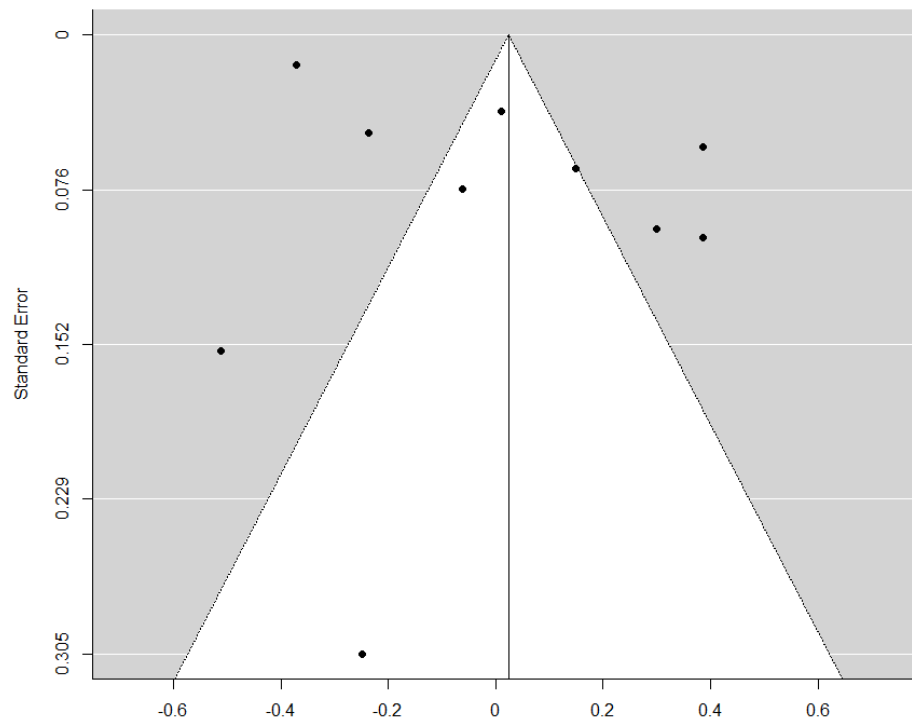

**Suppl. Figure S100.** Funnel plot comparing Indigenous and White patients (reference) regarding dialysis mortality.

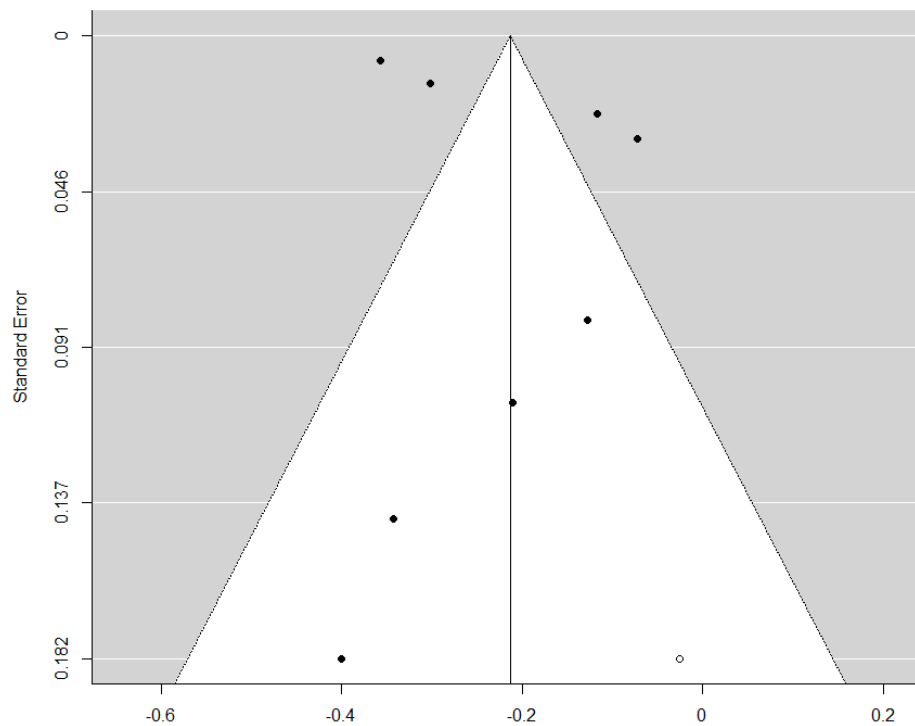

**Suppl. Figure S101.** Funnel plot comparing Hispanic and White patients (reference) regarding dialysis mortality.

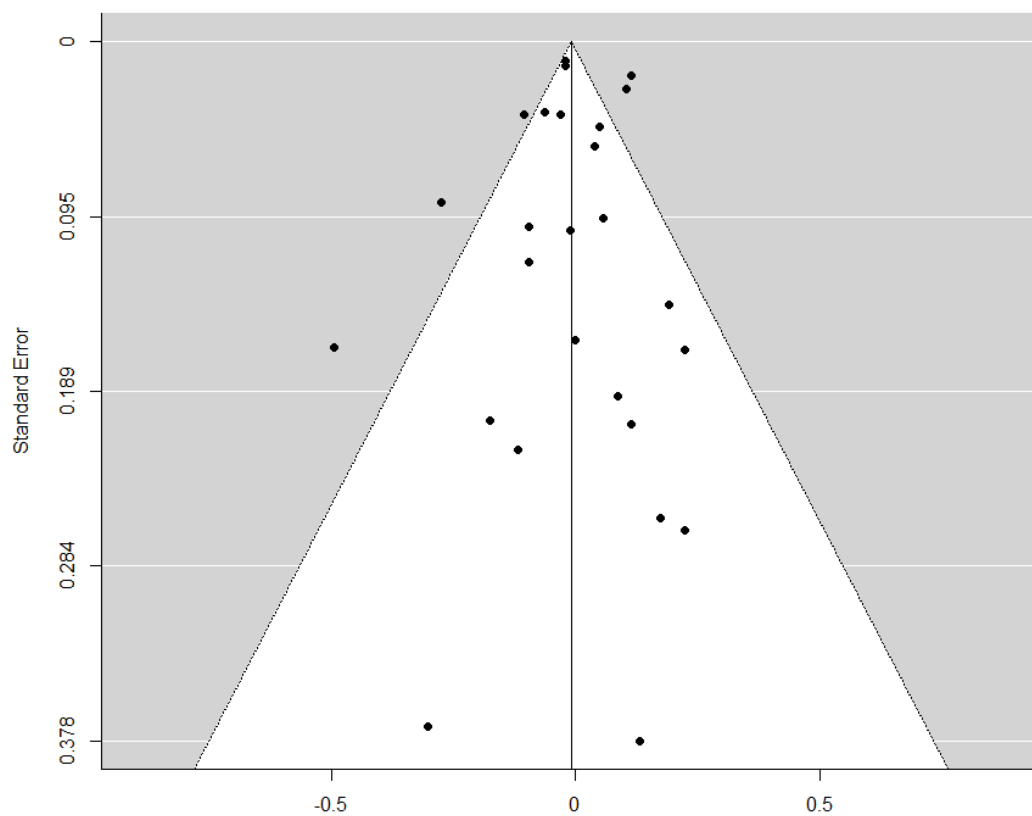

**Suppl. Figure S102.** Funnel plot of female patients (reference) and dialysis mortality.

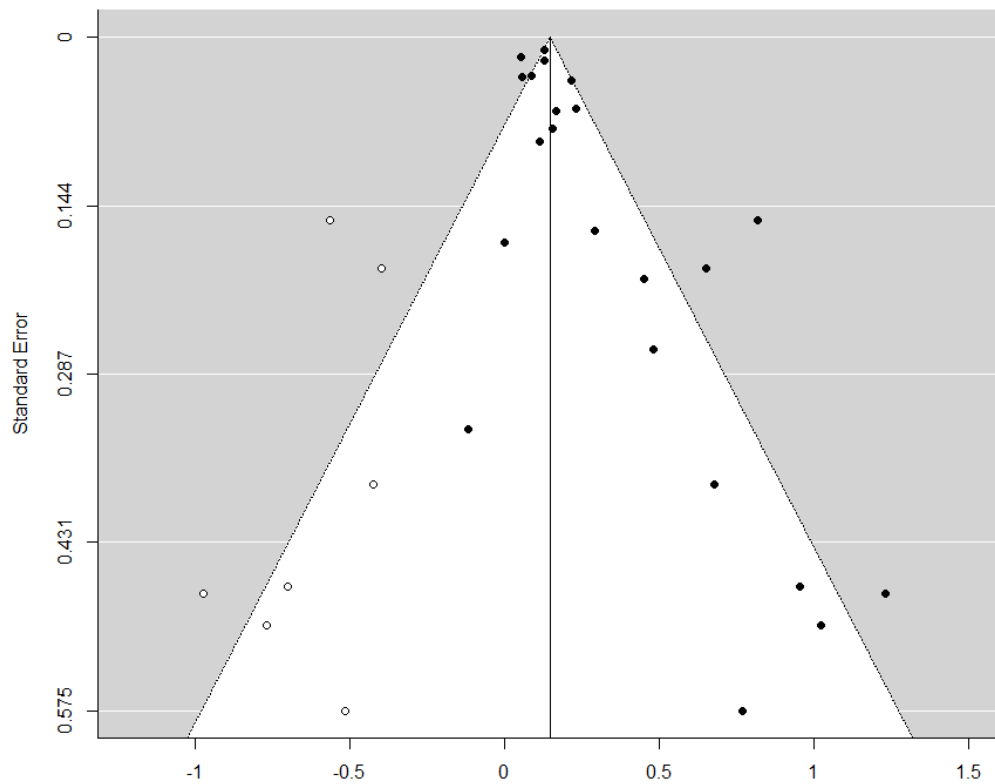

**Suppl. Figure S103.** Funnel plot comparing low and high socioeconomic status patients (reference) regarding dialysis mortality.

## 6.9. Waitlisting

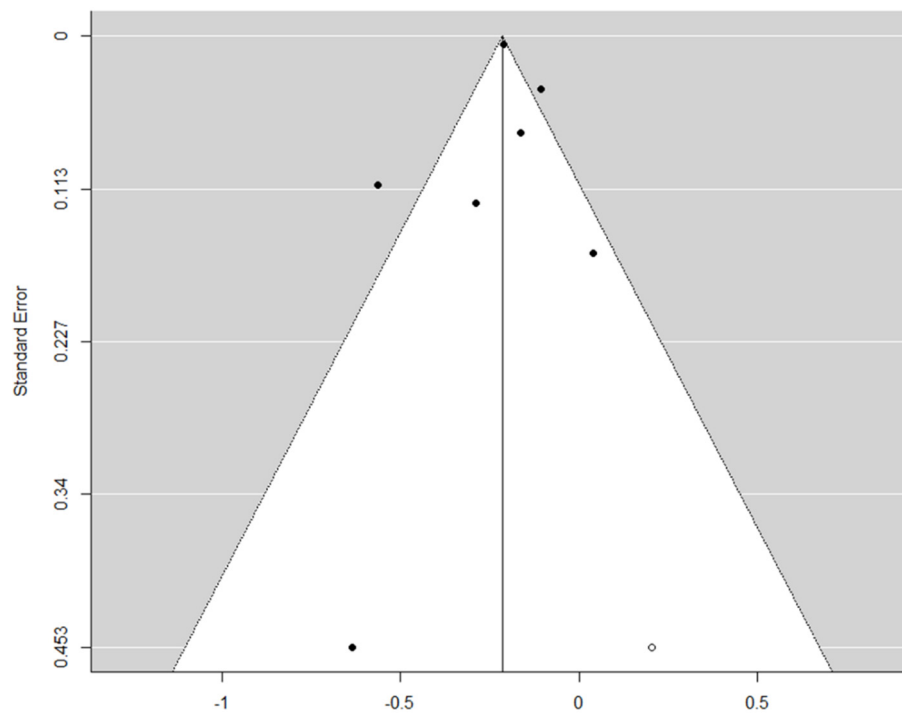

**Suppl. Figure S104.** Funnel plot comparing Black and White patients (reference) regarding waitlisting.

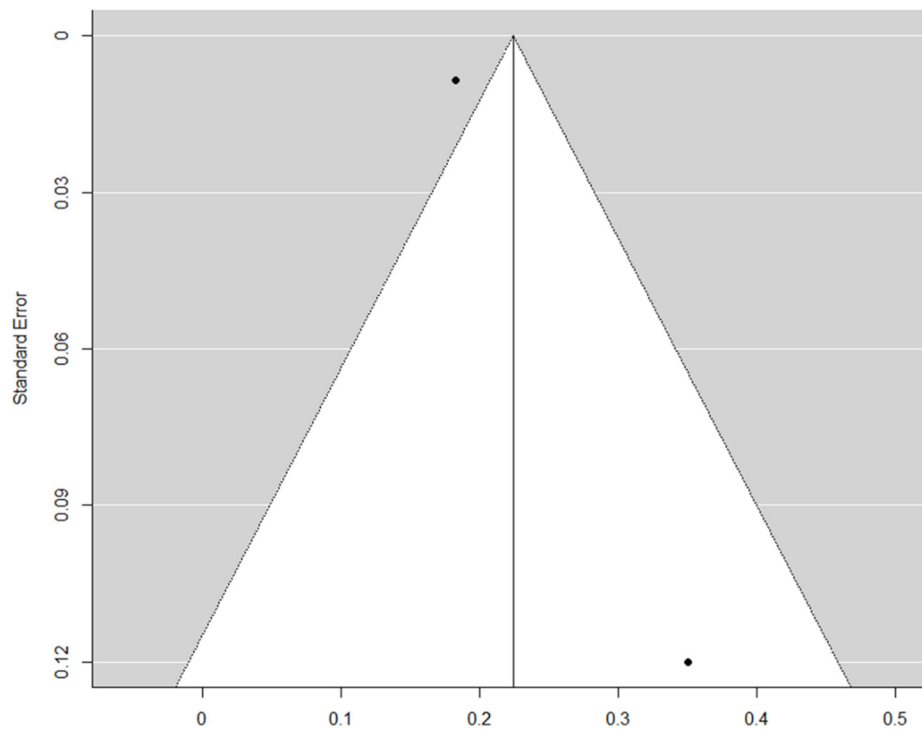

**Suppl. Figure S105.** Funnel plot comparing Asian and White patients (reference) regarding waitlisting.

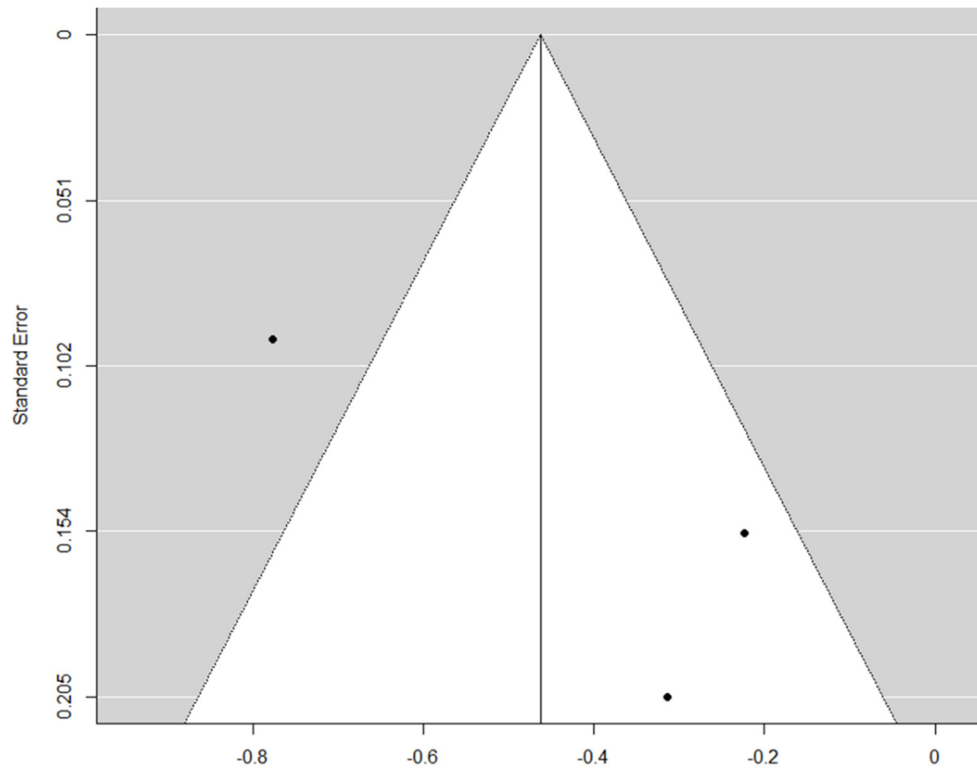

**Suppl. Figure S106.** Funnel plot comparing Indigenous and White patients (reference) regarding waitlisting.

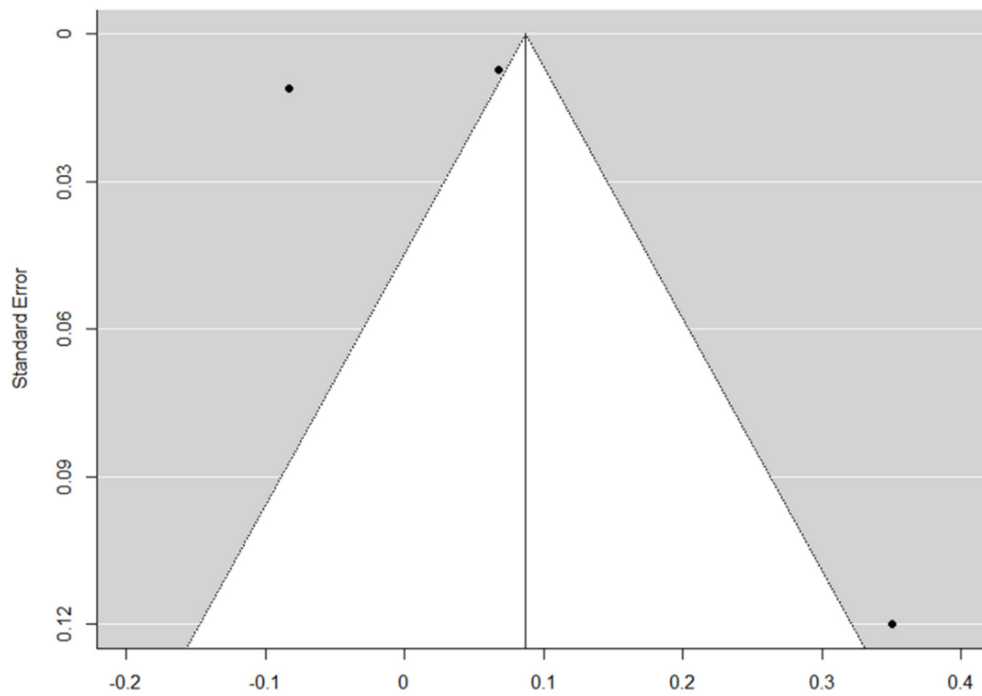

**Suppl. Figure S107.** Funnel plot comparing Hispanic and White patients (reference) regarding waitlisting.

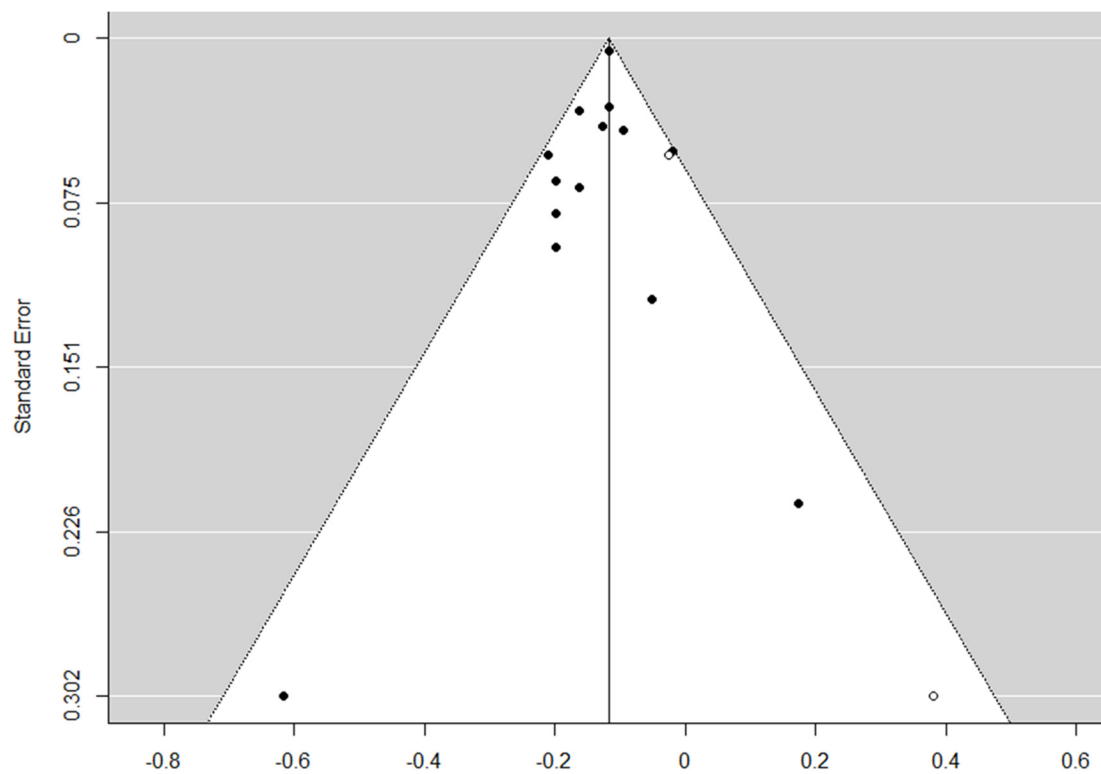



## 6.10. Kidney transplantation

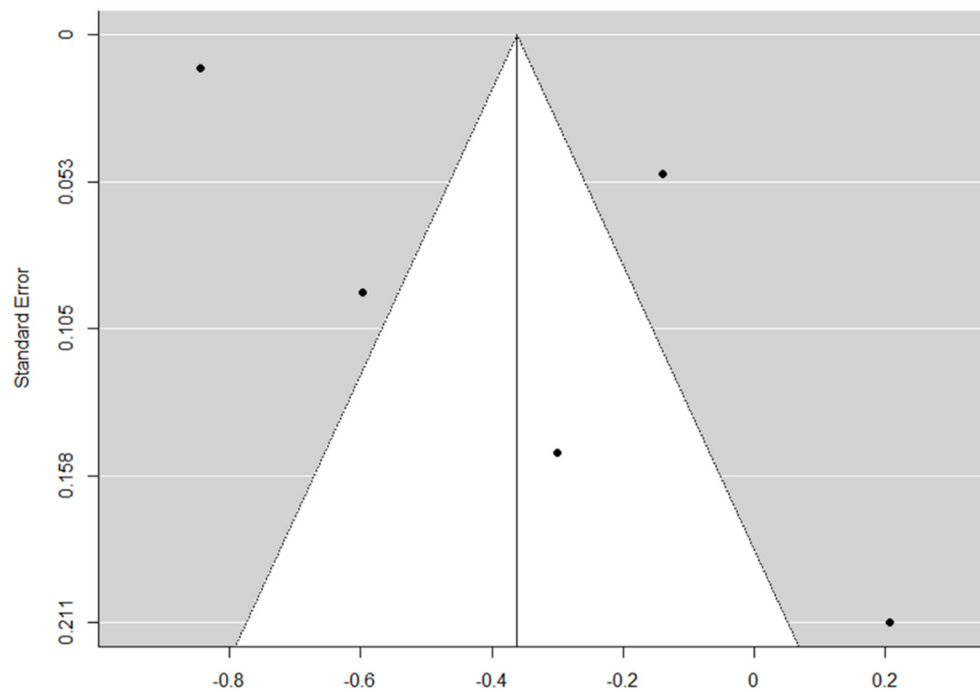

**Suppl. Figure S110.** Funnel plot comparing Black and White patients (reference) regarding kidney transplantation.

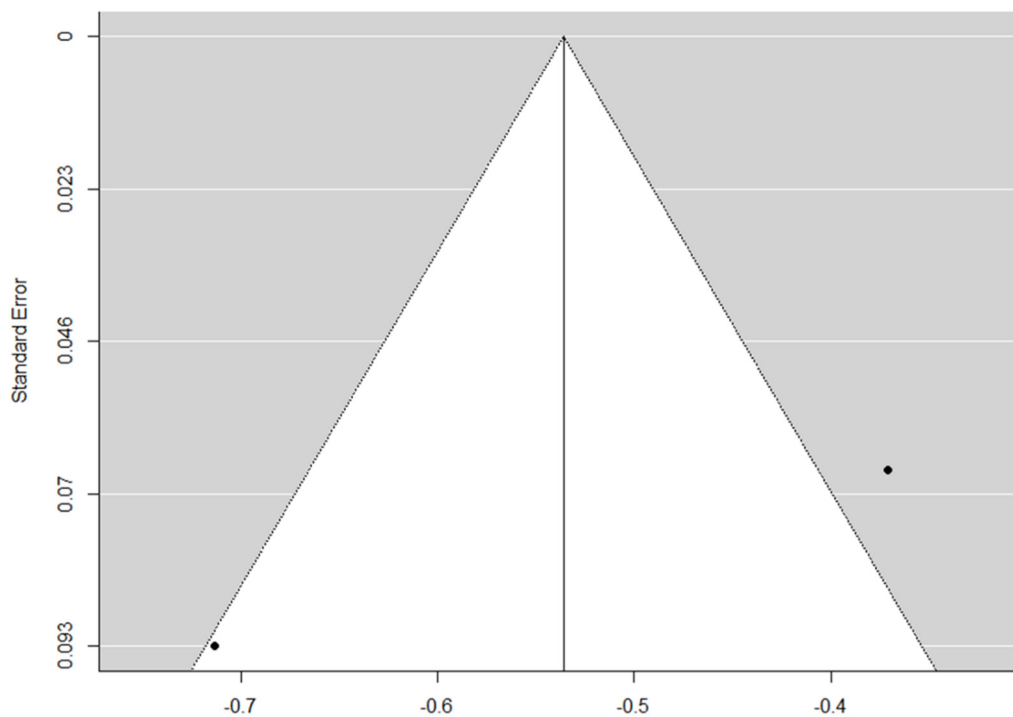

**Suppl. Figure S111.** Funnel plot comparing Asian and White patients (reference) regarding kidney transplantation.

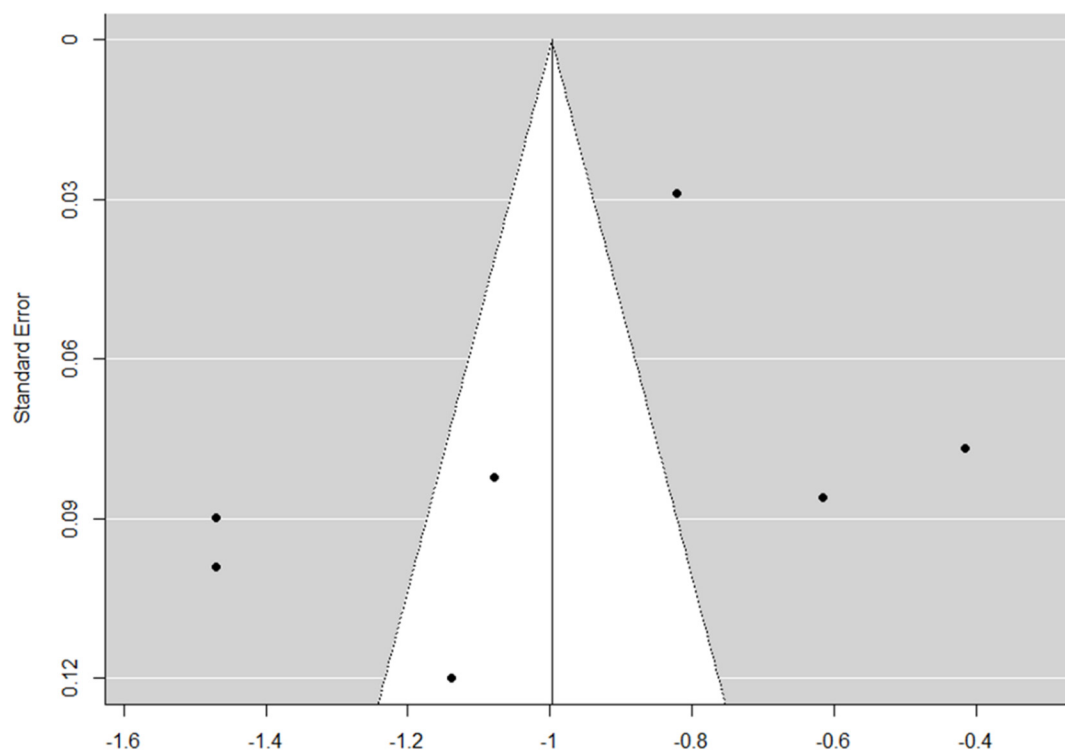

**Suppl. Figure S112.** Funnel plot comparing Indigenous and White patients (reference) regarding kidney transplantation.

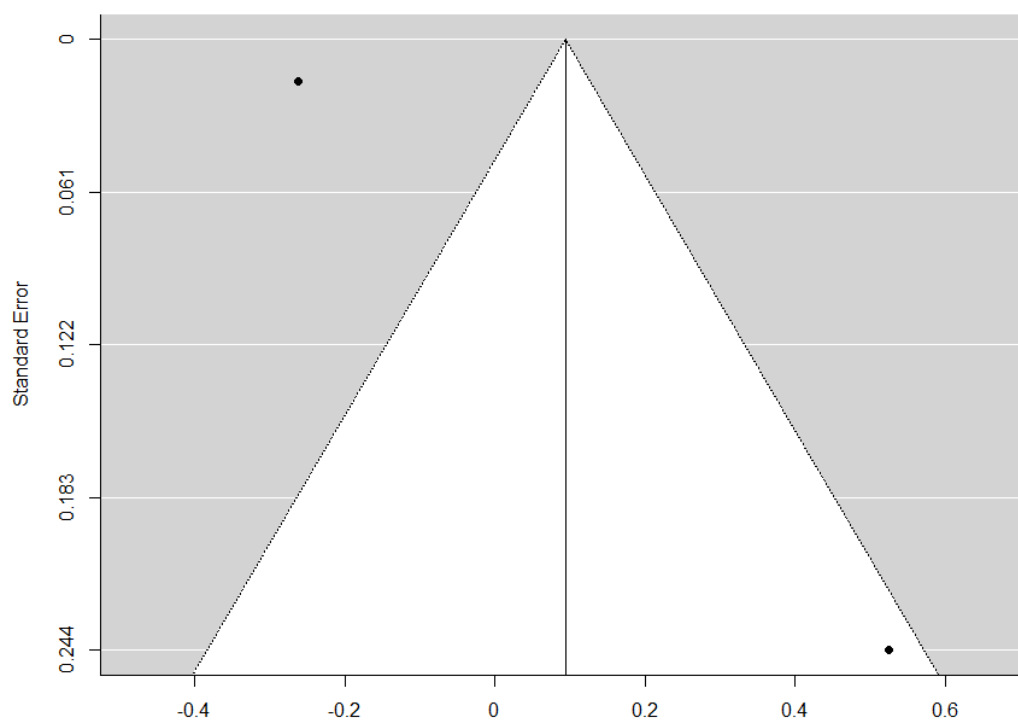

**Suppl. Figure S113.** Funnel plot comparing Hispanic and White patients (reference) regarding kidney transplantation.

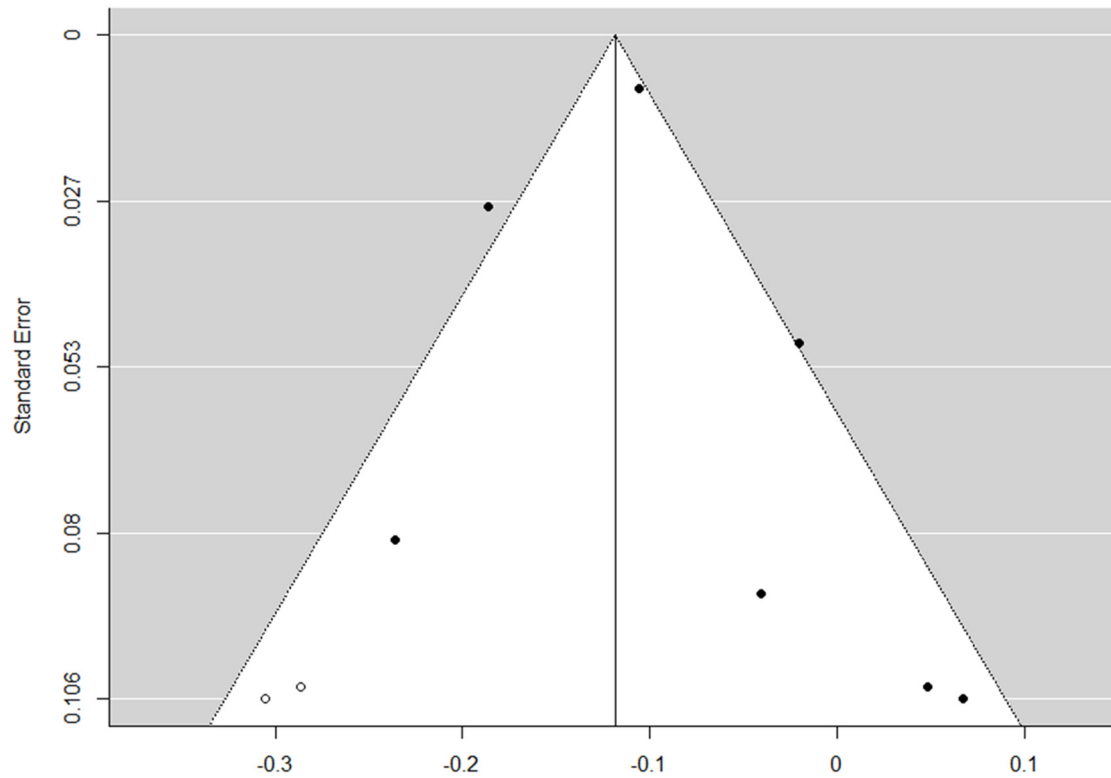

**Suppl. Figure S114.** Funnel plot of female patients (reference) and kidney transplantation.

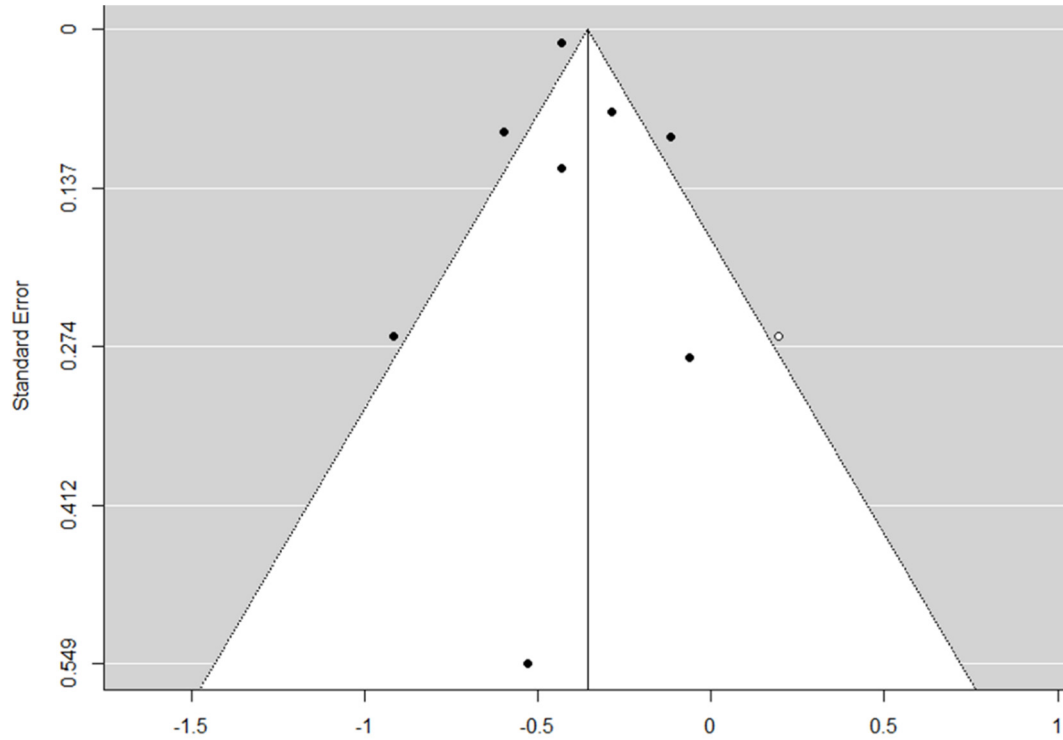

**Suppl. Figure S115.** Funnel plot comparing low and high socioeconomic status patients (reference) regarding kidney transplantation.

## 6.11. Living-donor transplantation

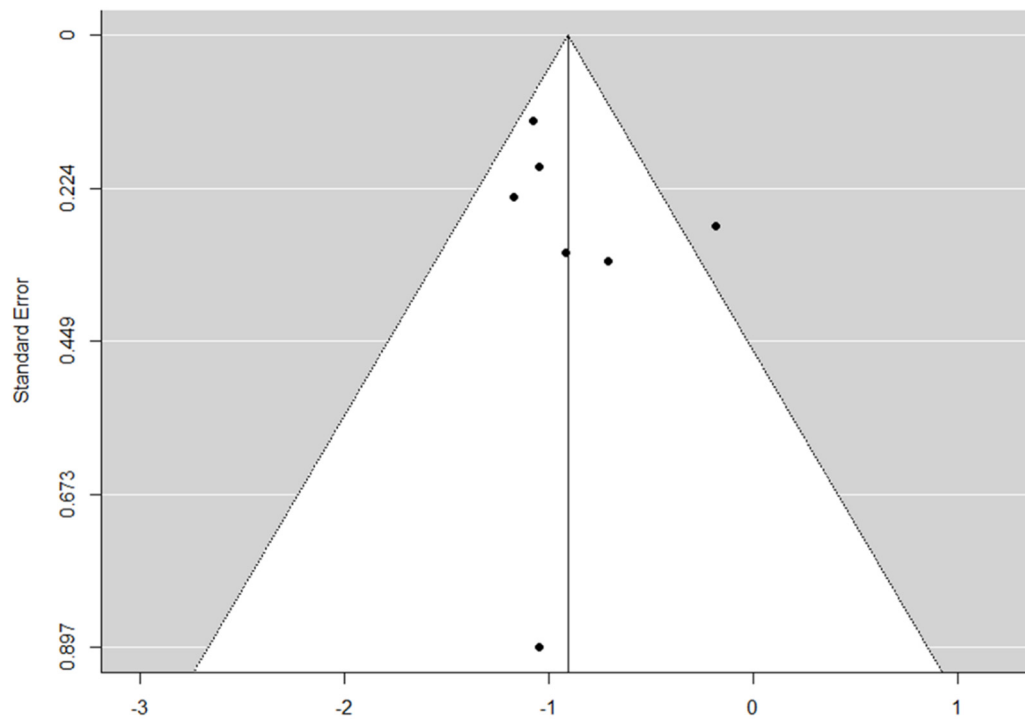

**Suppl. Figure S116.** Funnel plot comparing Black and White patients (reference) regarding living-donor transplantation.

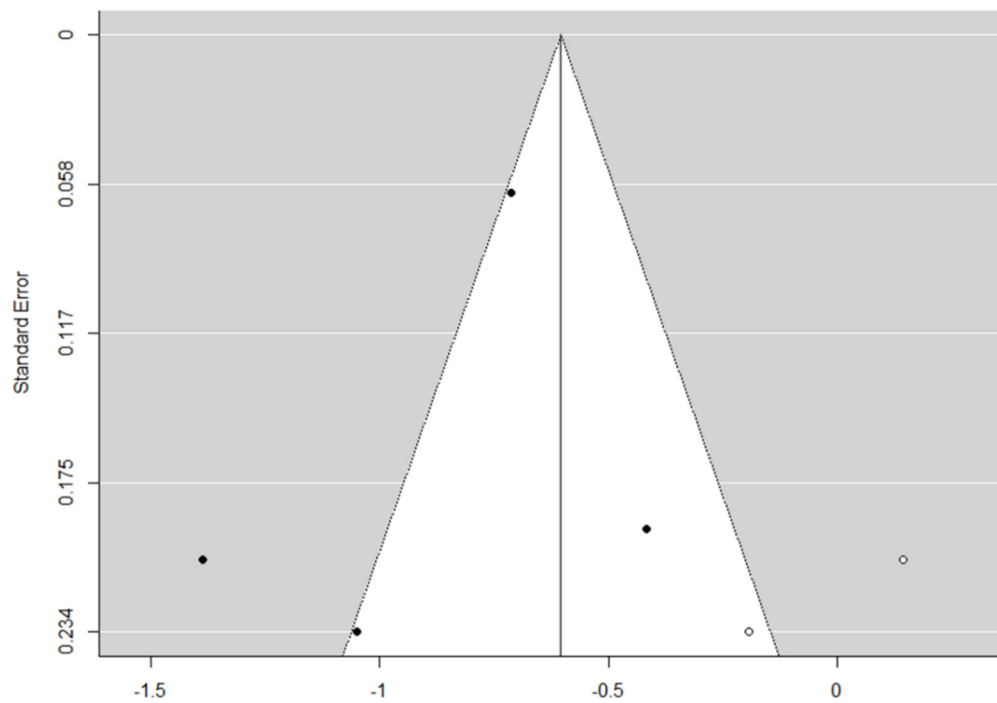

**Suppl. Figure S117.** Funnel plot comparing Asian and White patients (reference) regarding living-donor transplantation.

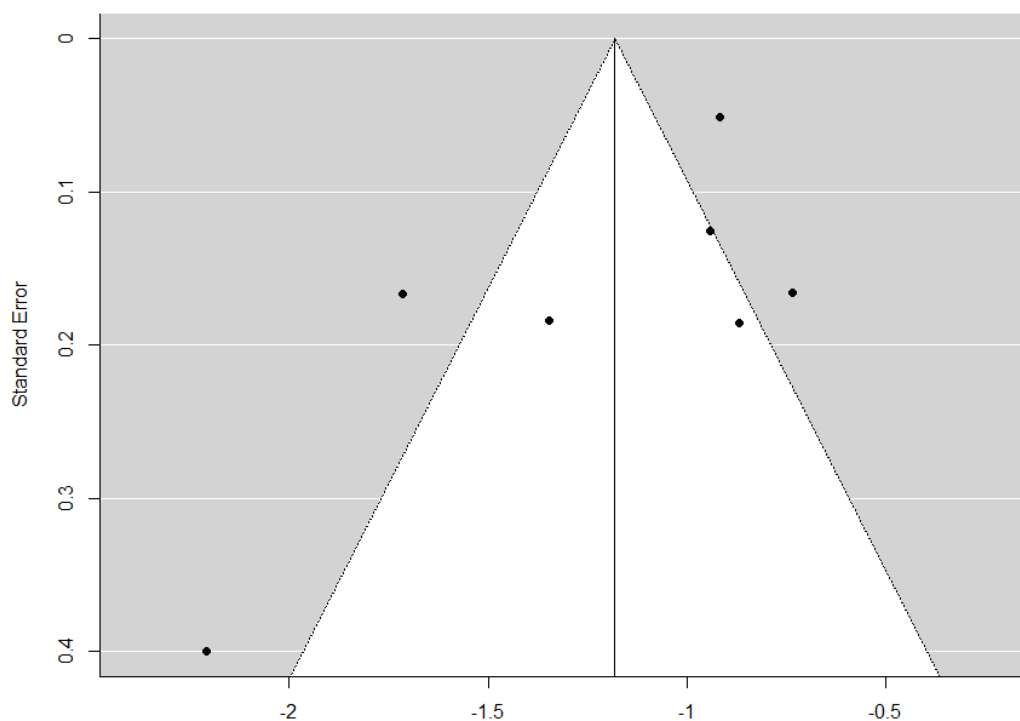

**Suppl. Figure S118.** Funnel plot comparing Indigenous and White patients (reference) regarding living-donor transplantation.

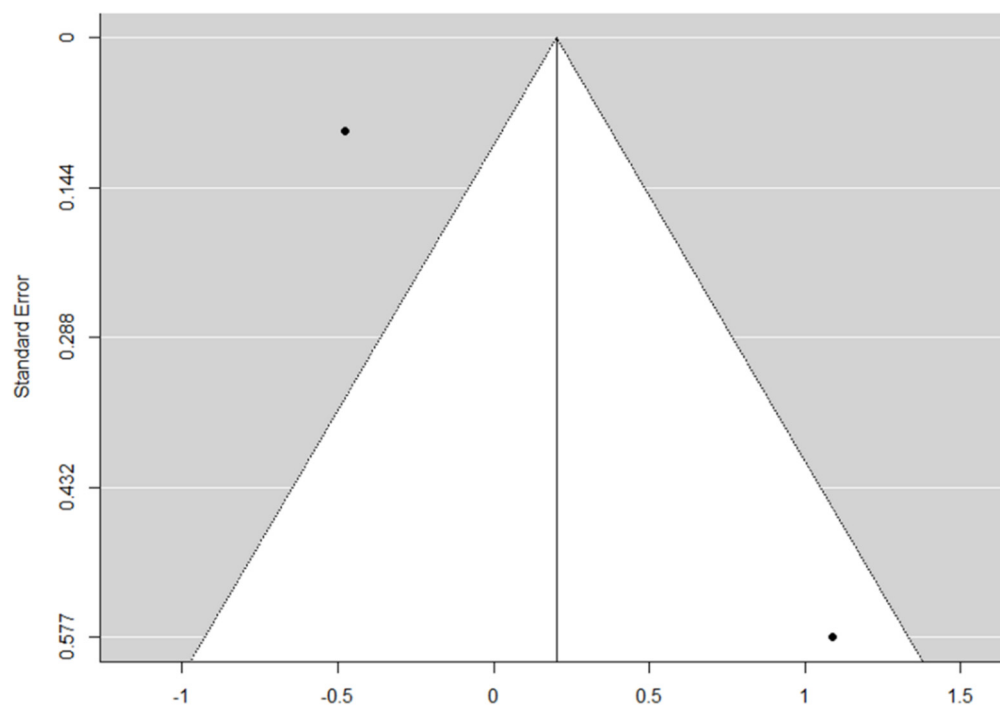

**Suppl. Figure S119.** Funnel plot comparing Hispanic and White patients (reference) regarding living-donor transplantation.

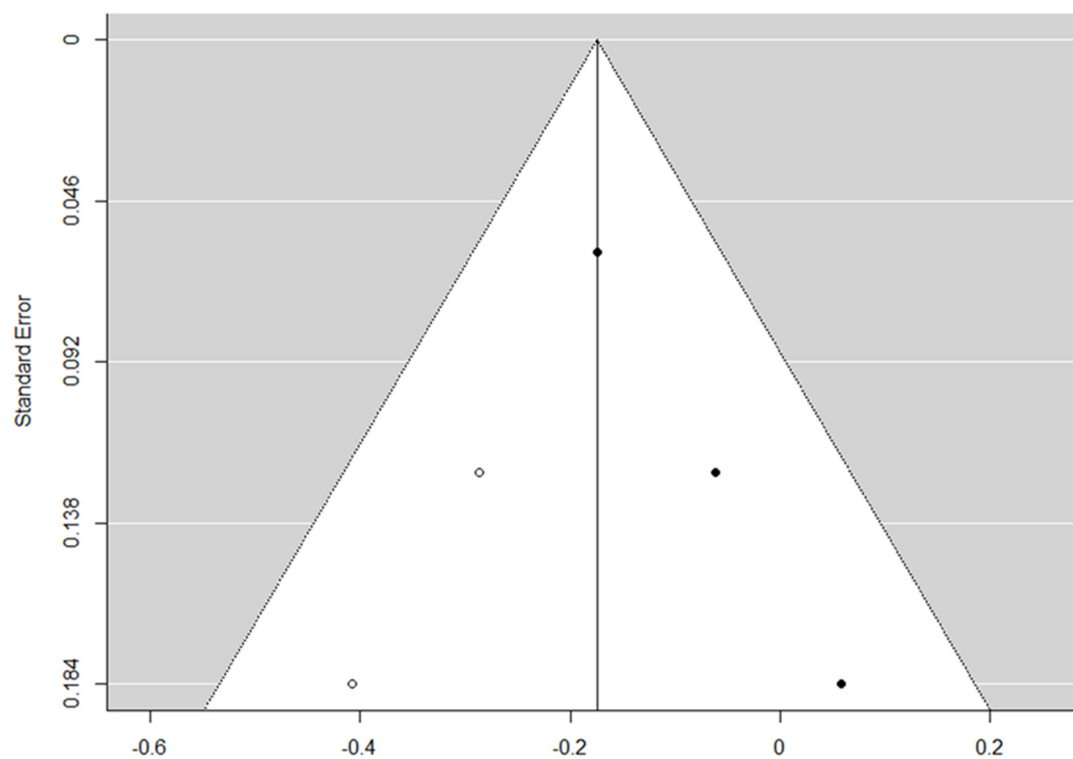

**Suppl. Figure S120.** Funnel plot of female patients (reference) and living-donor transplantation.

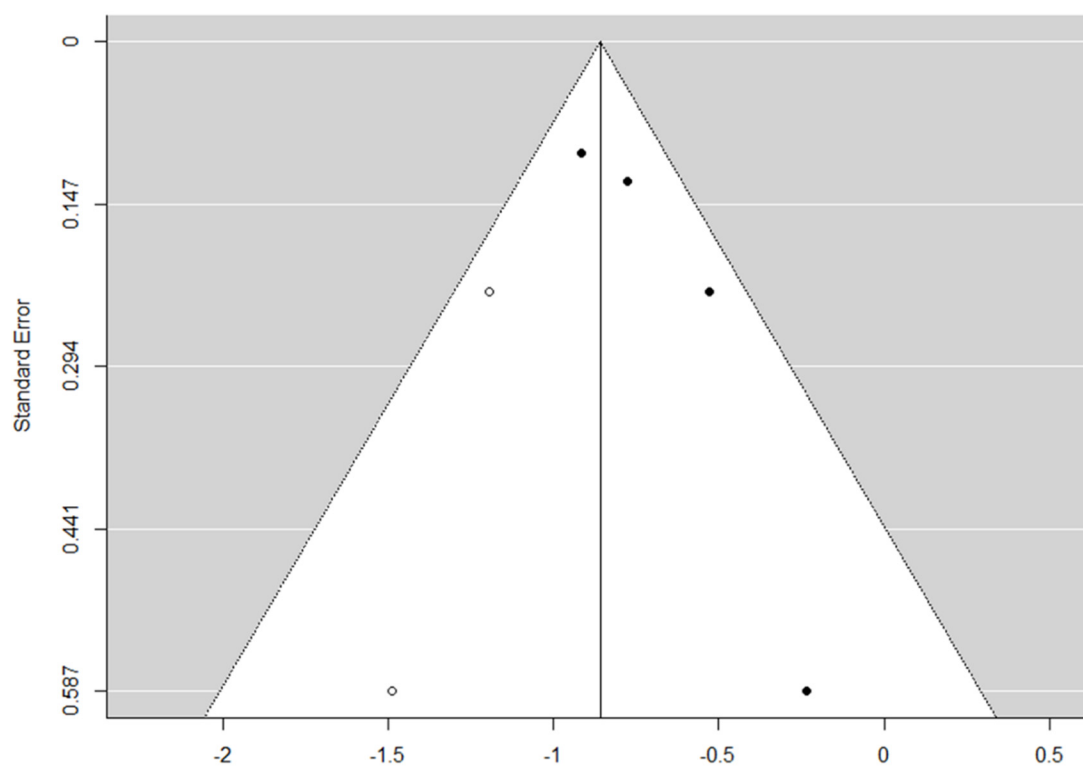

**Suppl. Figure S121.** Funnel plot comparing low and high socioeconomic status patients (reference) regarding living-donor transplantation.

## 6.12. Deceased-donor transplantation

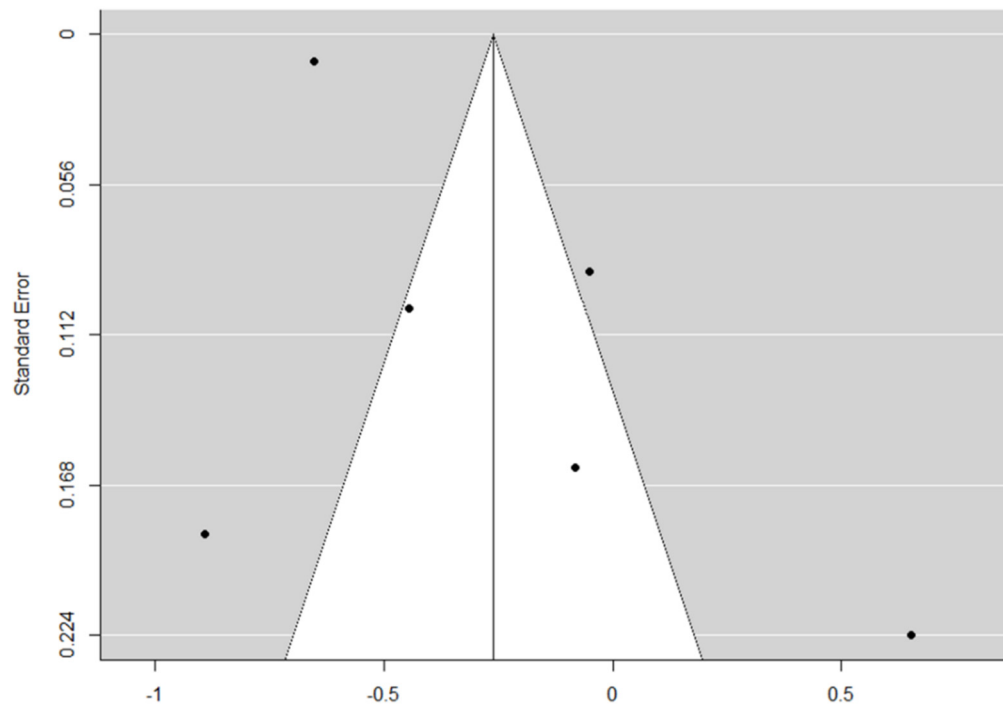

**Suppl. Figure S122.** Funnel plot comparing Black and White patients (reference) regarding deceased-donor transplantation.

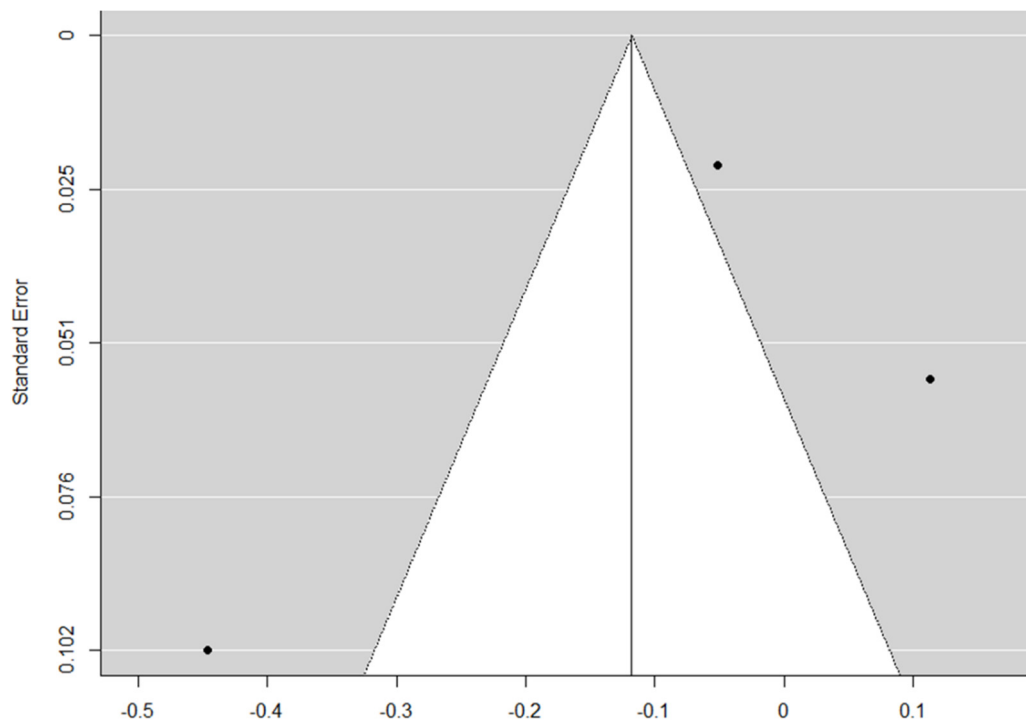

**Suppl. Figure S123.** Funnel plot comparing Asian and White patients (reference) regarding deceased-donor transplantation.

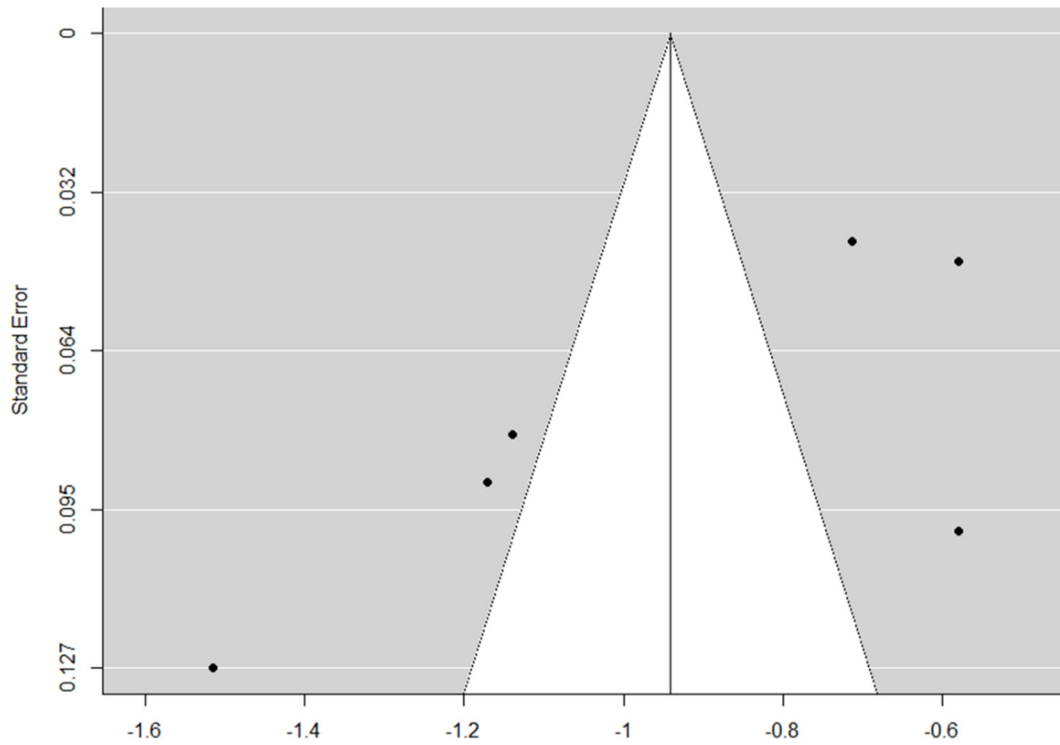

**Suppl. Figure S124.** Funnel plot comparing Indigenous and White patients (reference) regarding deceased-donor transplantation.

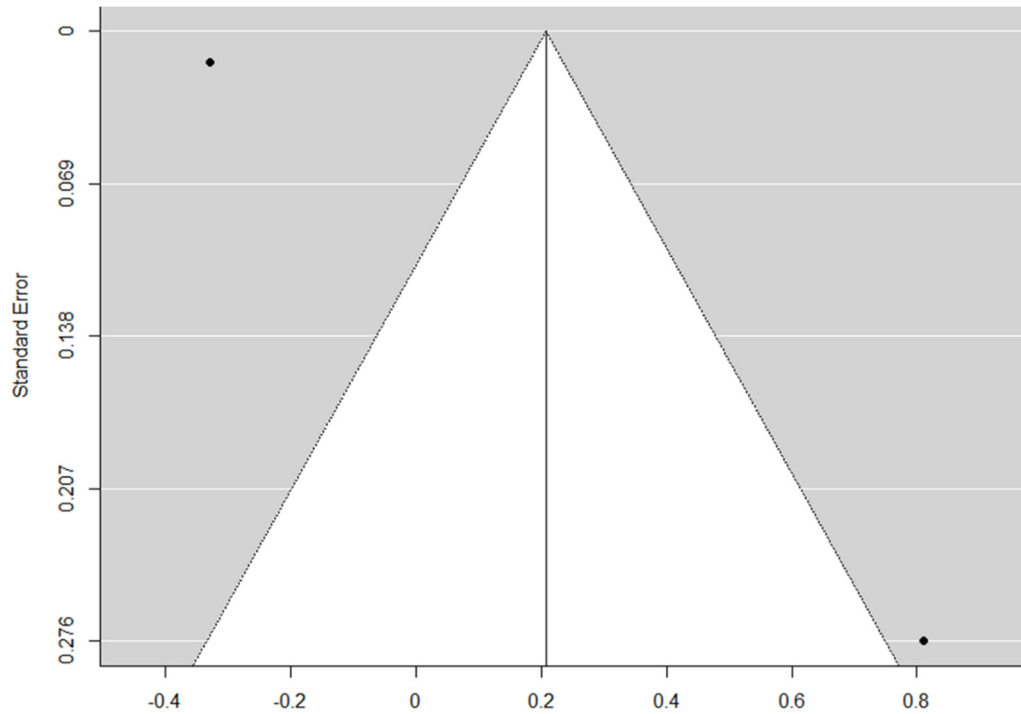

**Suppl. Figure S125.** Funnel plot comparing Hispanic and White patients (reference) regarding deceased-donor transplantation.



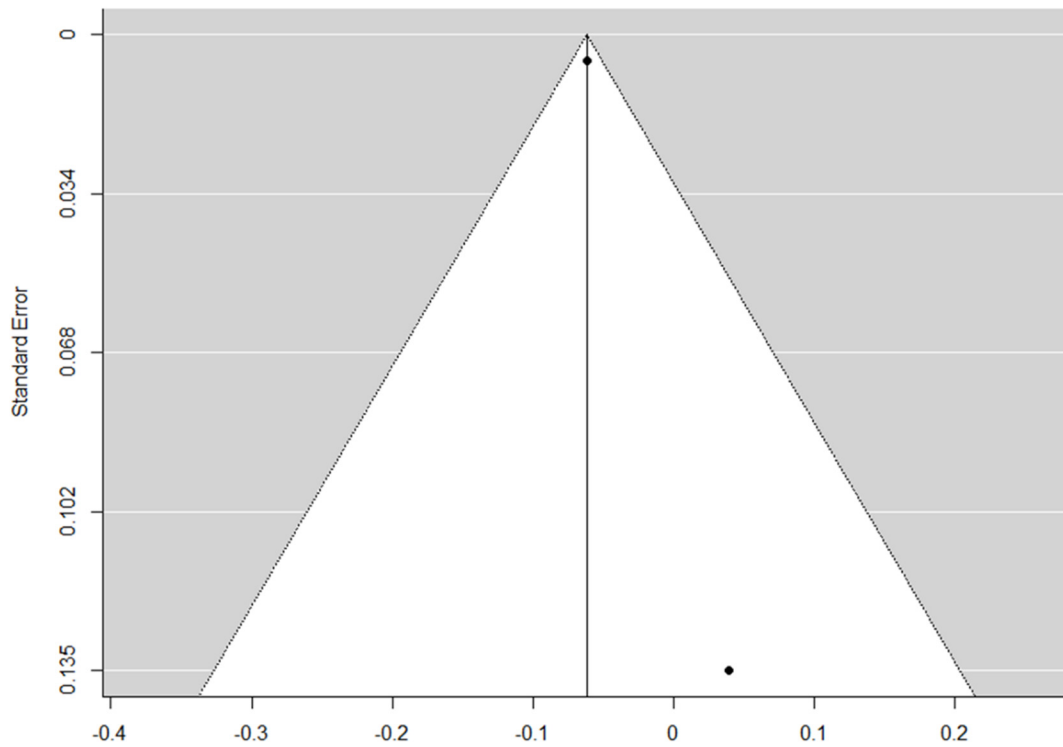

**Suppl. Figure S126.** Funnel plot of female patients (reference) and deceased-donor transplantation.

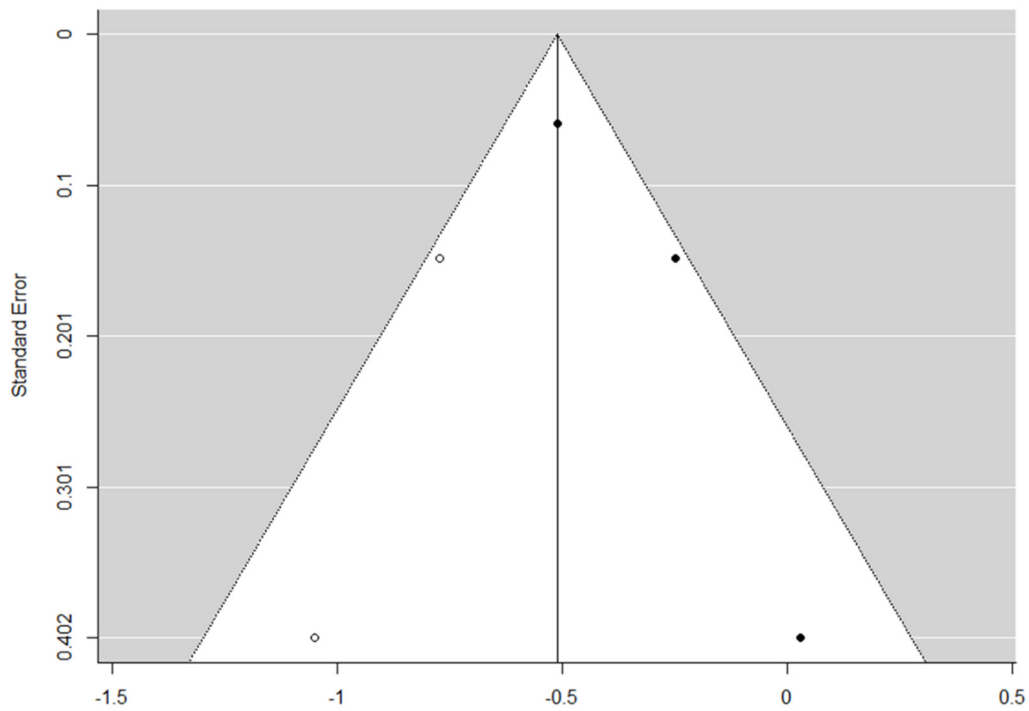

**Suppl. Figure S127.** Funnel plot comparing low and high socioeconomic status patients (reference) regarding deceased-donor transplantation.

### 6.13. Preemptive transplantation

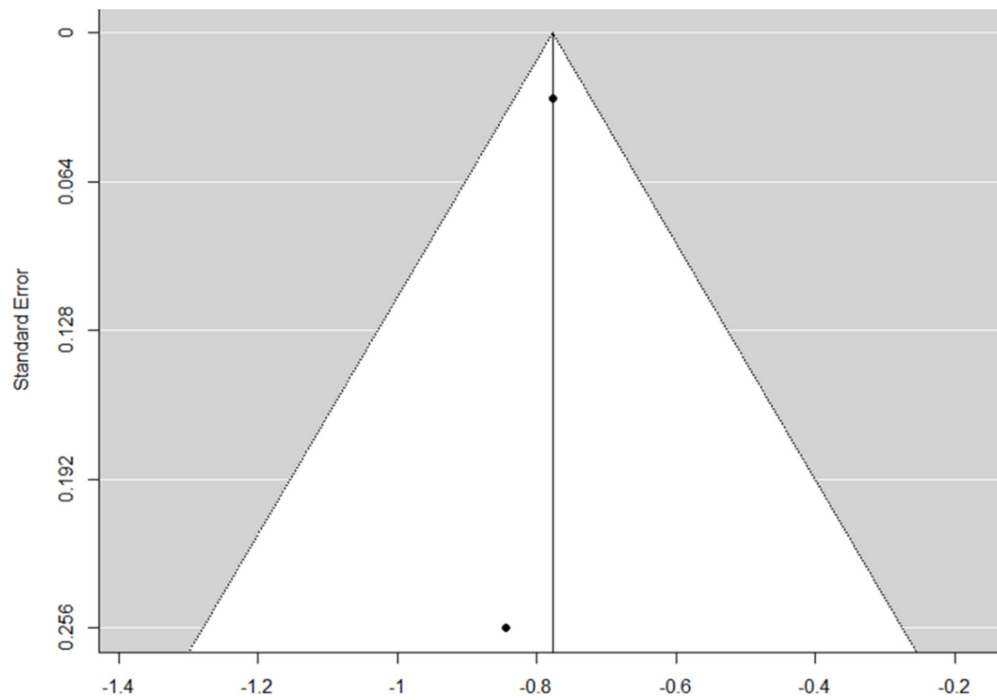

**Suppl. Figure S128.** Funnel plot comparing Black and White patients (reference) regarding preemptive transplantation.

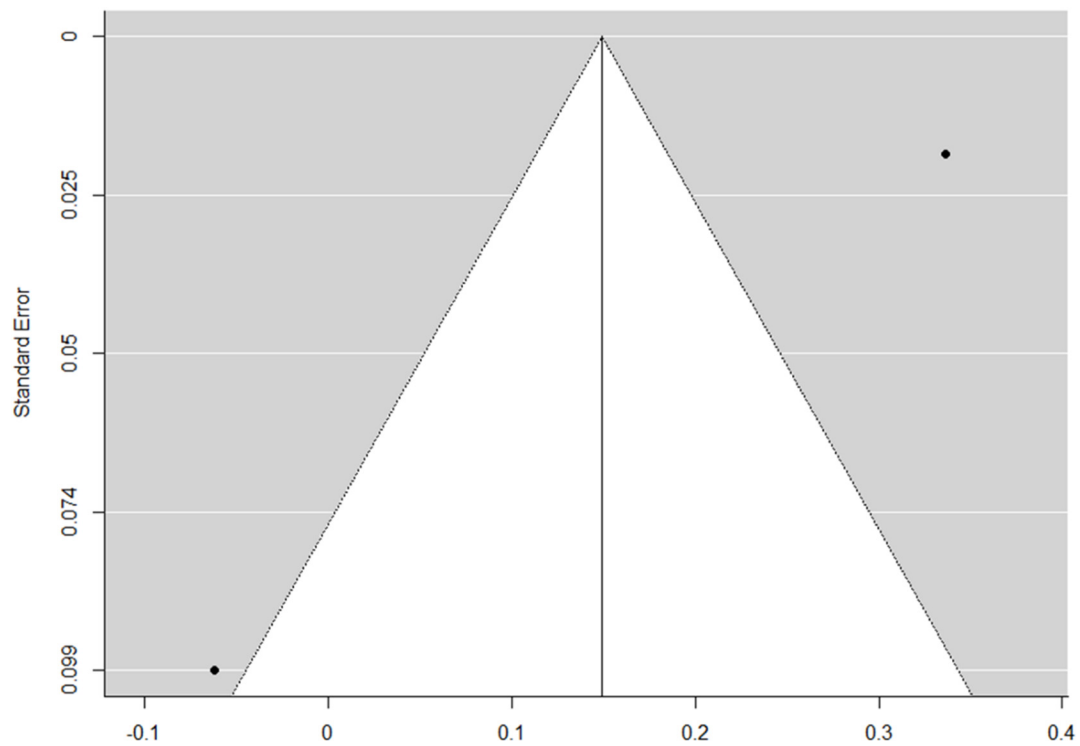

**Suppl. Figure S129.** Funnel plot of female patients (reference) and preemptive transplantation.

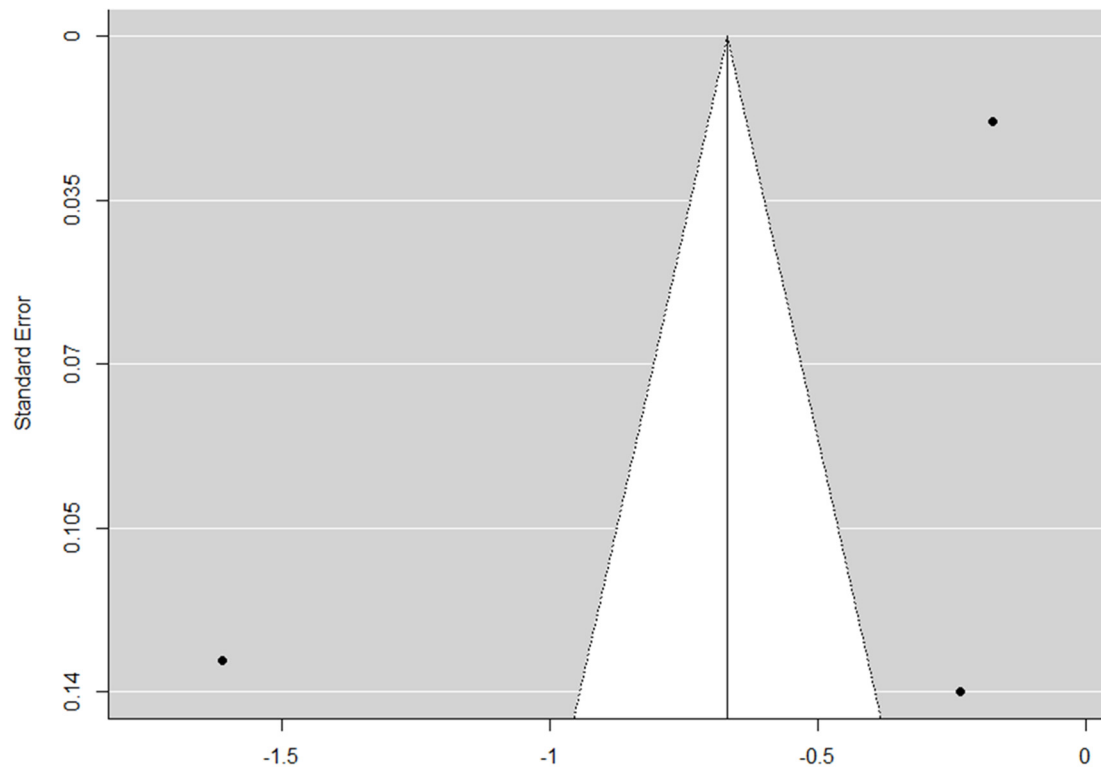

**Suppl. Figure S130.** Funnel plot comparing low and high socioeconomic status patients (reference) regarding preemptive transplantation.

## 6.14. Graft survival

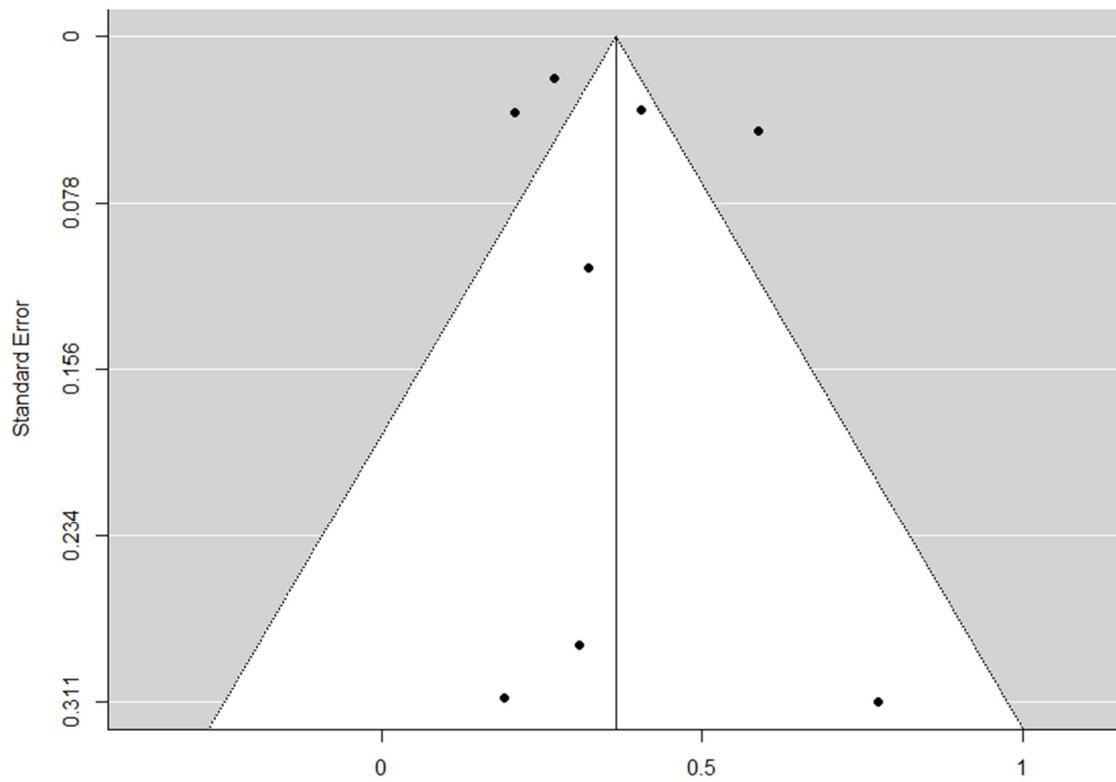

**Suppl. Figure S131.** Funnel plot comparing Black and White patients (reference) regarding graft survival.

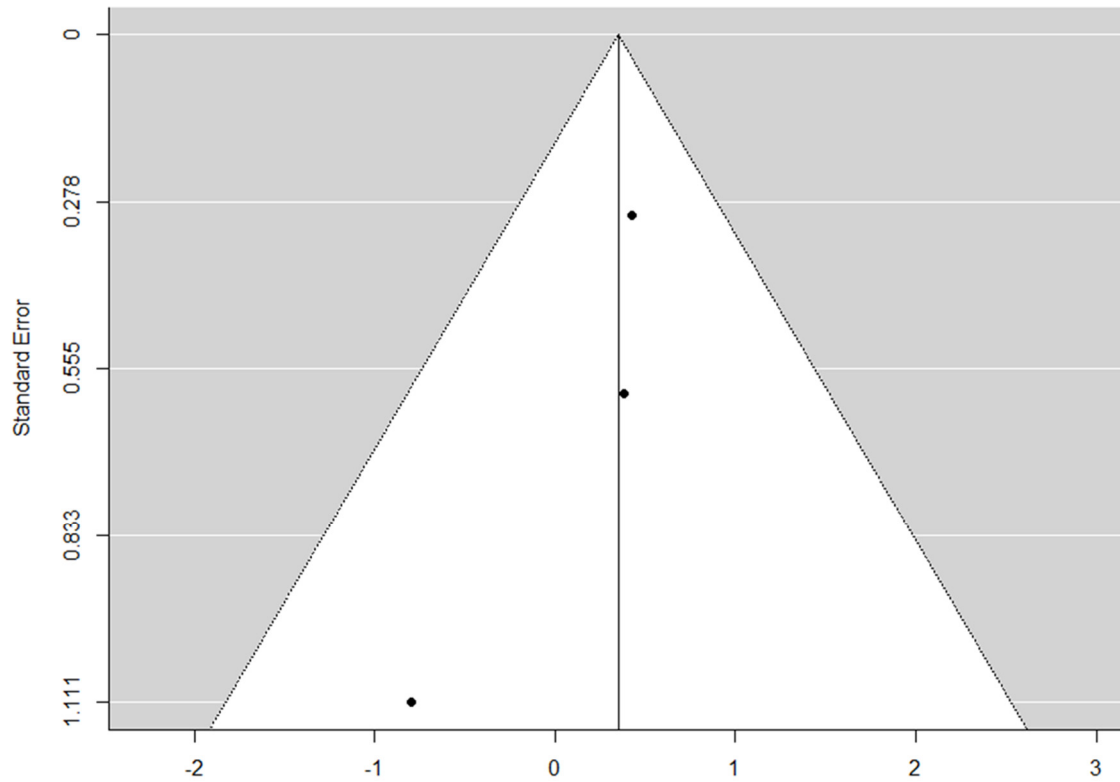

**Suppl. Figure S132.** Funnel plot comparing Indigenous and White patients (reference) regarding graft survival.

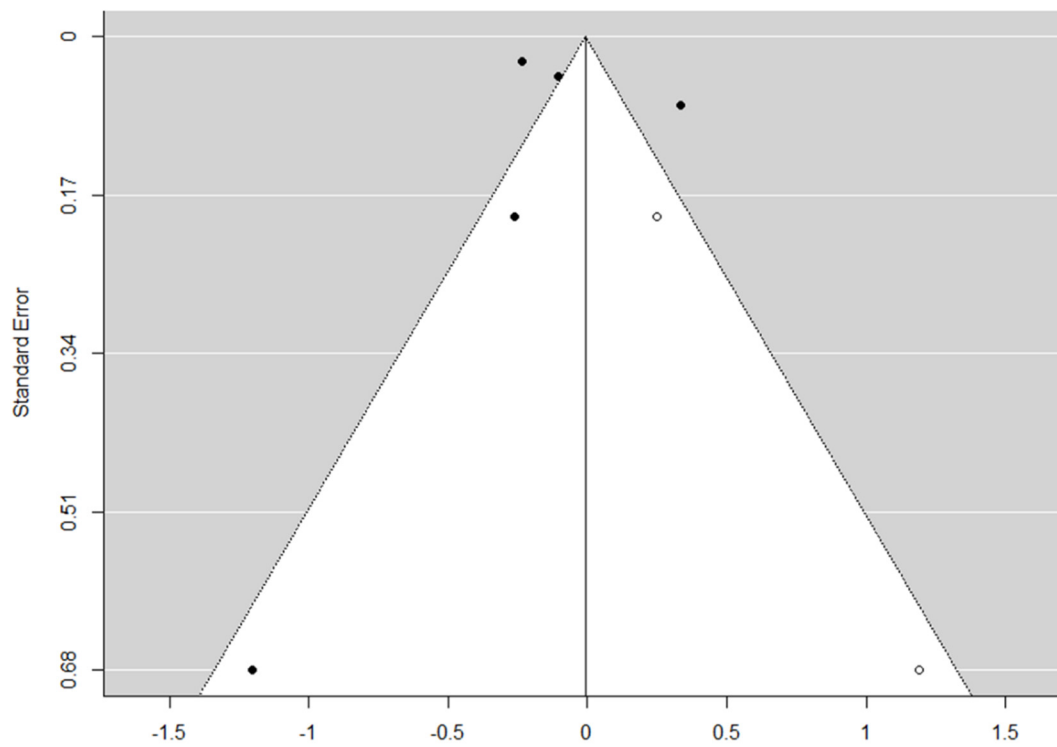

**Suppl. Figure S133.** Funnel plot comparing Hispanic and White patients (reference) regarding graft survival.

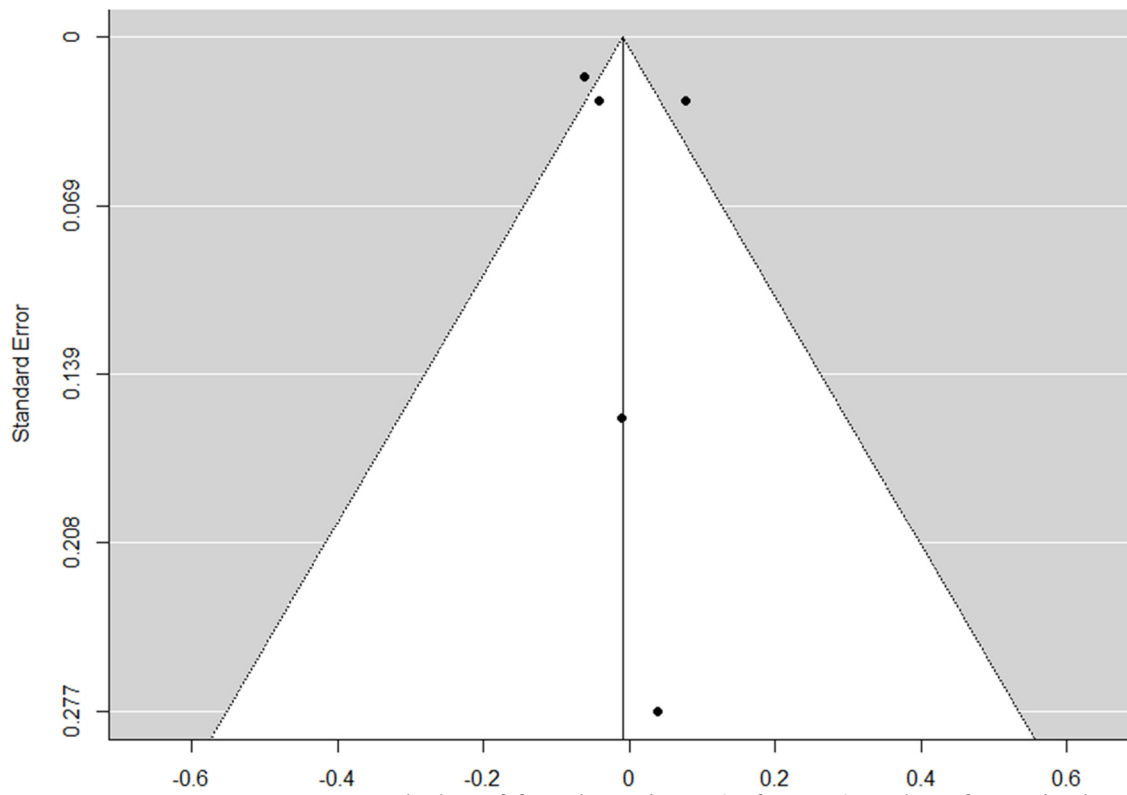

**Suppl. Figure S134.** Funnel plot of female patients (reference) and graft survival.

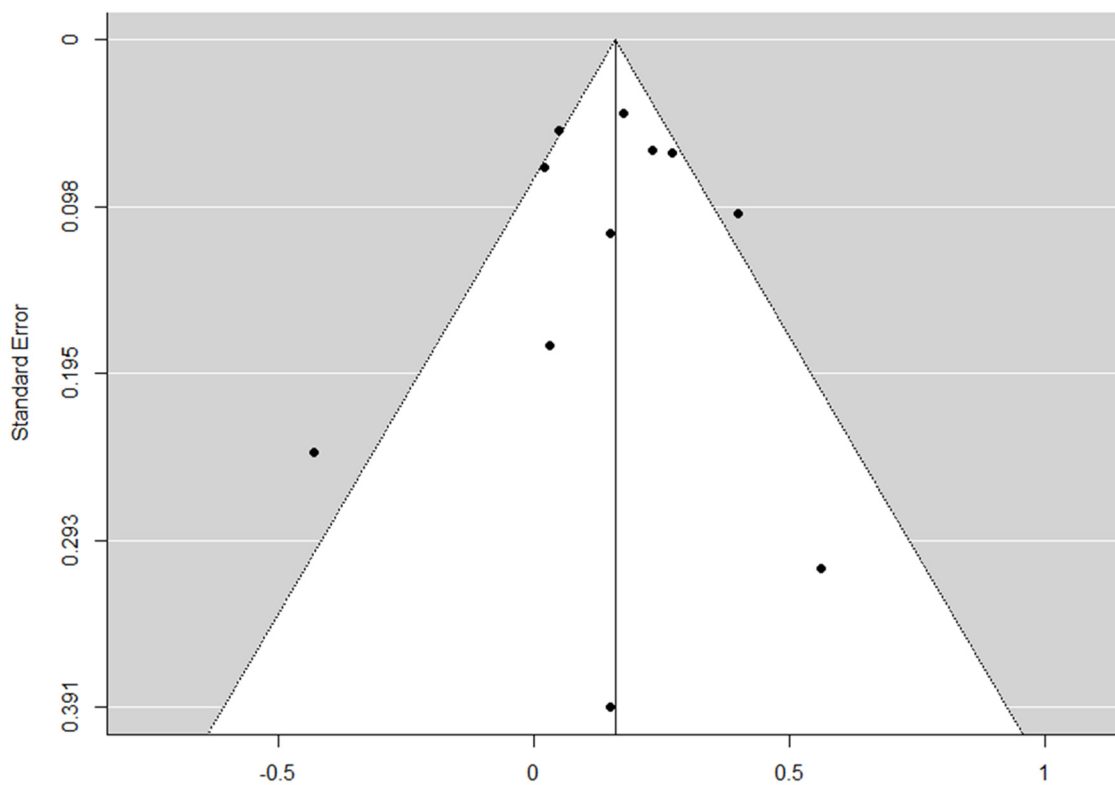

**Suppl. Figure S135.** Funnel plot comparing low and high socioeconomic status patients (reference) regarding graft survival.

## 6.15. Kidney transplantation survival

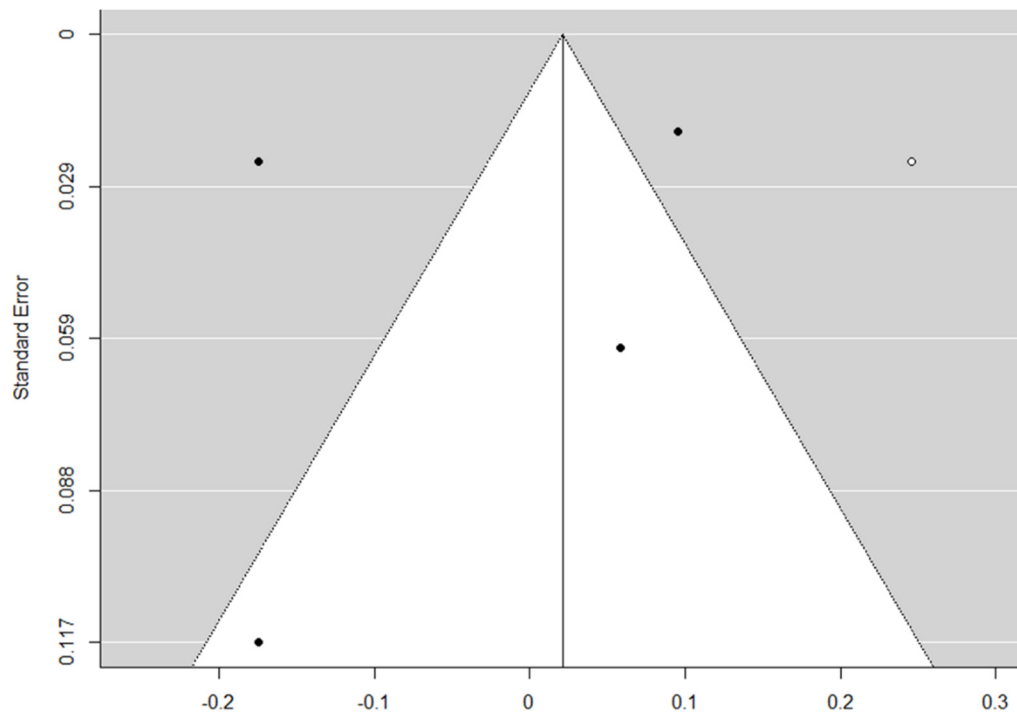

**Suppl. Figure S136.** Funnel plot comparing Black and White patients (reference) regarding kidney transplantation survival.

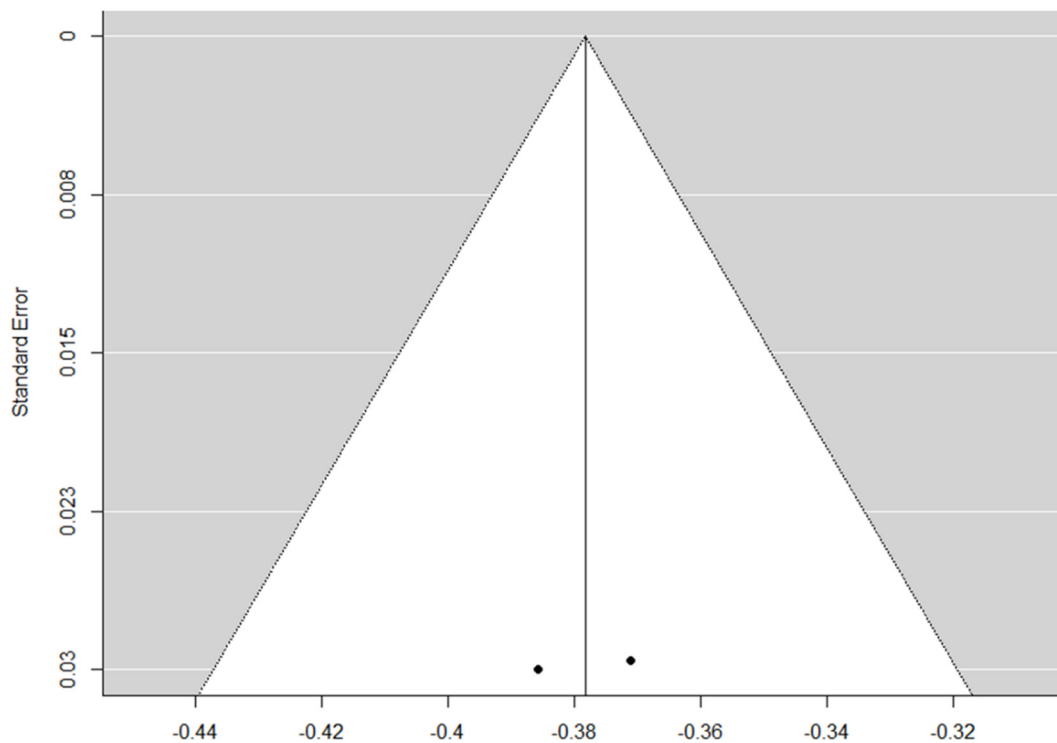

**Suppl. Figure S137.** Funnel plot comparing Hispanic and White patients (reference) regarding kidney transplantation survival.

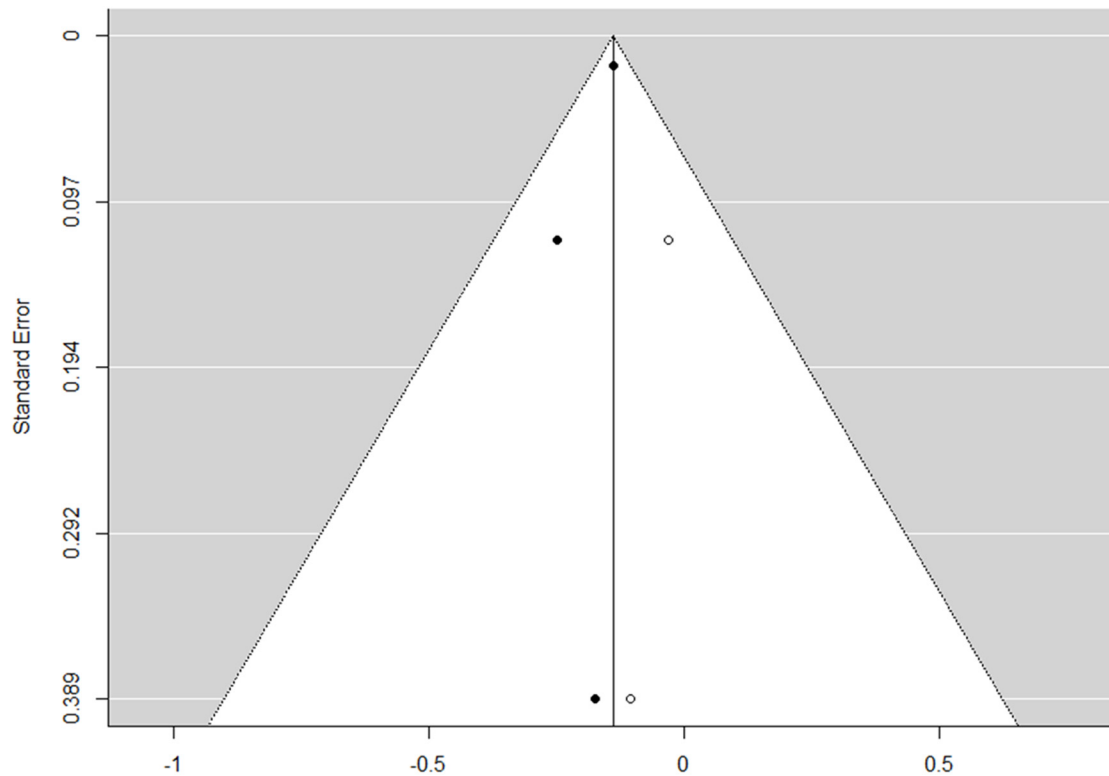

**Suppl. Figure S138.** Funnel plot of female patients (reference) and kidney transplantation survival.

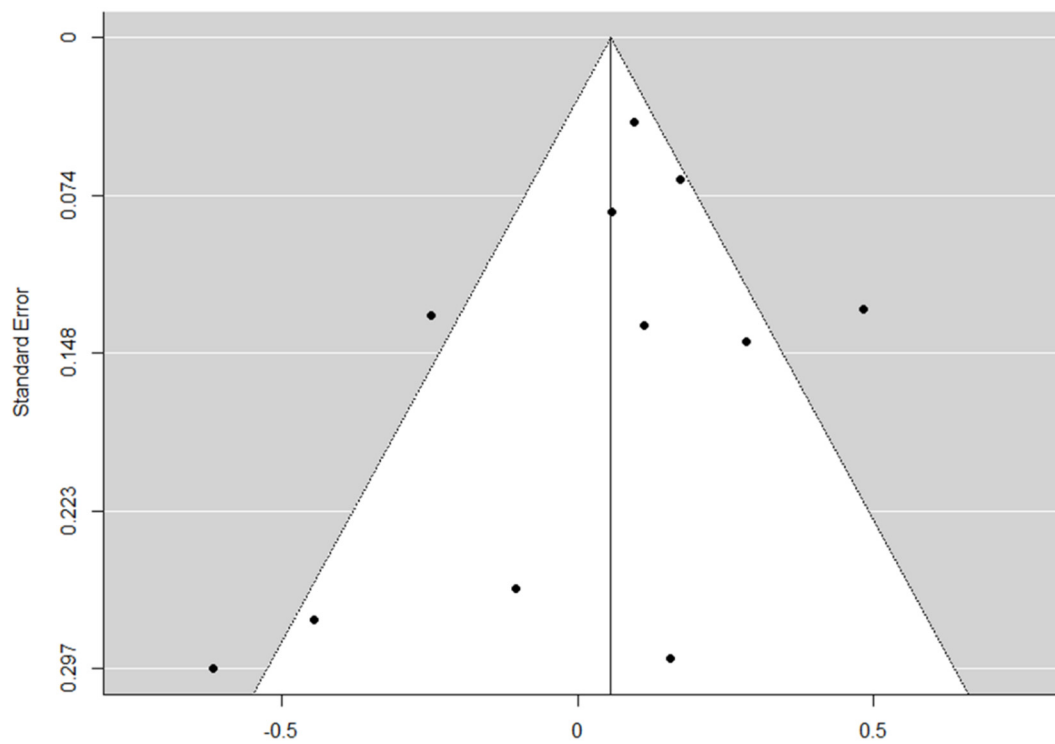

**Suppl. Figure S139.** Funnel plot comparing low and high socioeconomic status patients (reference) regarding kidney transplantation survival.



## Supplementary S7: Subgroup analyses

**Suppl. Table S5.** Subgroup analysis of the meta-analysis regarding female patients and dialysis initiation with arteriovenous fistula or graft.

| Subgroup              | Studies no. | OR (95% CI)      | P for subgroup difference |
|-----------------------|-------------|------------------|---------------------------|
| <b>Study location</b> |             |                  |                           |
| <i>North America</i>  | 2           | 0.85 (0.84-0.86) | 0.611                     |
| <i>Oceania</i>        | 2           | 0.67 (0.31-1.43) |                           |
| <b>Risk of bias</b>   |             |                  |                           |
| <i>Low</i>            | 4           | 0.78 (0.60-1.02) | 0.899                     |
| <i>Moderate</i>       | 1           | 0.81 (0.72-0.91) |                           |

**Suppl. Table S6.** Subgroup analysis of the meta-analysis regarding low socioeconomic status and dialysis initiation with arteriovenous fistula or graft.

| Subgroup              | Studies no. | OR (95% CI)      | P for subgroup difference |
|-----------------------|-------------|------------------|---------------------------|
| <b>Study location</b> |             |                  |                           |
| <i>North America</i>  | 4           | 0.84 (0.69-1.03) | 0.216                     |
| <i>Oceania</i>        | 1           | 0.48 (0.22-1.05) |                           |
| <b>Exposure</b>       |             |                  |                           |
| <i>Low income</i>     | 2           | 0.89 (0.71-1.12) | 0.063                     |
| <i>Low education</i>  | 2           | 0.56 (0.41-0.77) |                           |
| <i>Unemployment</i>   | 1           | 0.95 (0.84-1.08) |                           |

**Suppl. Table S7.** Subgroup analysis of the meta-analysis regarding female patients and primary arteriovenous fistula patency.

| Subgroup              | Studies no. | HR (95% CI)      | P for subgroup difference |
|-----------------------|-------------|------------------|---------------------------|
| <b>Study location</b> |             |                  |                           |
| <i>North America</i>  | 2           | 0.79 (0.72-0.87) | <b>0.025</b>              |
| <i>Europe</i>         | 1           | 0.50 (0.34-0.73) |                           |
| <i>International</i>  | 1           | 1.19 (0.68-2.10) |                           |
| <b>Risk of bias</b>   |             |                  |                           |
| <i>Low</i>            | 3           | 0.80 (0.73-0.88) | <b>0.020</b>              |
| <i>Moderate</i>       | 1           | 0.50 (0.34-0.73) |                           |

**Suppl. Table S8.** Subgroup analysis of the meta-analysis regarding low socioeconomic status and primary arteriovenous fistula patency.

| <b>Subgroup</b>       | <b>Studies no.</b> | <b>OR (95% CI)</b> | <b>P for subgroup difference</b> |
|-----------------------|--------------------|--------------------|----------------------------------|
| <b>Study location</b> |                    |                    |                                  |
| <i>Oceania</i>        | 1                  | 0.79 (0.66-0.94)   | N/A                              |
| <i>Europe</i>         | 1                  | 0.87 (0.48-1.56)   |                                  |
| <i>Asia</i>           | 1                  | 0.39 (0.18-0.84)   |                                  |
| <b>Risk of bias</b>   |                    |                    |                                  |
| <i>Low</i>            | 1                  | 0.79 (0.66-0.94)   | 0.663                            |
| <i>Moderate</i>       | 2                  | 0.61 (0.28-1.33)   |                                  |
| <b>Exposure</b>       |                    |                    |                                  |
| <i>Low income</i>     | 2                  | 0.80 (0.67-0.94)   | 0.076                            |
| <i>Low education</i>  | 1                  | 0.39 (0.18-0.84)   |                                  |

**Suppl. Table S9.** Subgroup analysis of the meta-analysis regarding Black patients and peritoneal dialysis use.

| <b>Subgroup</b>       | <b>Studies no.</b> | <b>OR (95% CI)</b> | <b>P for subgroup difference</b> |
|-----------------------|--------------------|--------------------|----------------------------------|
| <b>Study location</b> |                    |                    |                                  |
| <i>USA</i>            | 4                  | 0.58 (0.46-0.73)   | <b>0.019</b>                     |
| <i>Canada</i>         | 1                  | 1.04 (0.94-1.15)   |                                  |
| <b>Risk of bias</b>   |                    |                    |                                  |
| <i>Low</i>            | 2                  | 0.87 (0.63-1.22)   | <b>0.026</b>                     |
| <i>Moderate</i>       | 2                  | 0.49 (0.40-0.60)   |                                  |
| <i>Serious</i>        | 1                  | 0.58 (0.42-0.80)   |                                  |

**Suppl. Table S10.** Subgroup analysis of the meta-analysis regarding female patients and peritoneal dialysis use.

| <b>Subgroup</b>       | <b>Studies no.</b> | <b>OR (95% CI)</b> | <b>P for subgroup difference</b> |
|-----------------------|--------------------|--------------------|----------------------------------|
| <b>Study location</b> |                    |                    |                                  |
| <i>North America</i>  | 4                  | 1.06 (0.97-1.17)   | <b>0.002</b>                     |
| <i>Europe</i>         | 1                  | 0.69 (0.50-0.96)   |                                  |
| <i>Asia</i>           | 1                  | 2.13 (0.77-5.89)   |                                  |
| <i>Oceania</i>        | 1                  | 1.33 (1.25-1.41)   |                                  |
| <b>Risk of bias</b>   |                    |                    |                                  |
| <i>Low</i>            | 2                  | 1.04 (0.88-1.23)   | 0.925                            |
| <i>Moderate</i>       | 4                  | 1.08 (0.76-1.53)   |                                  |
| <i>Serious</i>        | 1                  | 1.17 (0.90-1.53)   |                                  |

**Suppl. Table S11.** Subgroup analysis of the meta-analysis regarding low socioeconomic status and peritoneal dialysis use.

| Subgroup       | Studies no. | OR (95% CI)      | P for subgroup difference |
|----------------|-------------|------------------|---------------------------|
| Study location |             |                  |                           |
| North America  | 2           | 0.47 (0.40-0.55) | <0.001                    |
| Europe         | 1           | 0.59 (0.45-0.78) |                           |
| Asia           | 1           | 0.48 (0.14-1.63) |                           |
| Oceania        | 1           | 0.73 (0.66-0.81) |                           |
| Risk of bias   |             |                  |                           |
| Moderate       | 4           | 0.59 (0.46-0.76) | 0.280                     |
| Serious        | 1           | 0.44 (0.33-0.58) |                           |
| Exposure       |             |                  |                           |
| Low income     | 4           | 0.49 (0.43-0.57) | <0.001                    |
| Low education  | 1           | 0.73 (0.66-0.81) |                           |

**Suppl. Table S12.** Subgroup analysis of the meta-analysis regarding Black patients and dialysis mortality.

| Subgroup            | Studies no. | HR (95% CI)      | P for subgroup difference |
|---------------------|-------------|------------------|---------------------------|
| Study location      |             |                  |                           |
| North America       | 11          | 0.74 (0.69-0.80) | <0.001                    |
| South America       | 1           | 0.69 (0.50-0.96) |                           |
| Europe              | 6           | 0.50 (0.44-0.56) |                           |
| Population          |             |                  |                           |
| Hemodialysis        | 6           | 0.72 (0.71-0.73) | 0.932                     |
| Peritoneal dialysis | 1           | 0.69 (0.50-0.96) |                           |
| Mixed               | 11          | 0.66 (0.57-0.76) |                           |
| Risk of bias        |             |                  |                           |
| Low                 | 12          | 0.68 (0.60-0.77) | 0.815                     |
| Moderate            | 6           | 0.65 (0.56-0.76) |                           |

**Suppl. Table S13.** Subgroup analysis of the meta-analysis regarding Asian patients and dialysis mortality.

| Subgroup            | Studies no. | HR (95% CI)      | P for subgroup difference |
|---------------------|-------------|------------------|---------------------------|
| Study location      |             |                  |                           |
| North America       | 5           | 0.68 (0.59-0.79) | 0.381                     |
| Europe              | 4           | 0.68 (0.61-0.76) |                           |
| Oceania             | 3           | 0.60 (0.49-0.73) |                           |
| Asia                | 1           | 0.48 (0.25-0.92) |                           |
| Population          |             |                  |                           |
| Hemodialysis        | 2           | 0.62 (0.51-0.77) | 0.541                     |
| Peritoneal dialysis | 4           | 0.61 (0.45-0.84) |                           |
| Mixed               | 8           | 0.69 (0.63-0.76) |                           |
| Risk of bias        |             |                  |                           |
| Low                 | 10          | 0.67 (0.61-0.74) | 0.628                     |
| Moderate            | 3           | 0.66 (0.50-0.89) |                           |
| Serious             | 1           | 0.48 (0.25-0.92) |                           |

**Suppl. Table S14.** Subgroup analysis of the meta-analysis regarding Indigenous patients and dialysis mortality.

| Subgroup            | Studies no. | HR (95% CI)      | P for subgroup difference |
|---------------------|-------------|------------------|---------------------------|
| Study location      |             |                  |                           |
| North America       | 5           | 0.99 (0.76-1.27) | 0.725                     |
| Oceania             | 6           | 1.05 (0.79-1.41) |                           |
| Population          |             |                  |                           |
| Hemodialysis        | 2           | 0.69 (0.67-0.71) | <0.001                    |
| Peritoneal dialysis | 2           | 0.72 (0.55-0.93) |                           |
| Mixed               | 7           | 1.22 (1.07-1.40) |                           |
| Risk of bias        |             |                  |                           |
| Low                 | 9           | 0.99 (0.79-1.24) | 0.533                     |
| Moderate            | 2           | 1.15 (0.87-0.53) |                           |

**Suppl. Table S15.** Subgroup analysis of the meta-analysis regarding Hispanic patients and dialysis mortality.

| Subgroup            | Studies no. | HR (95% CI)      | P for subgroup difference |
|---------------------|-------------|------------------|---------------------------|
| Study location      |             |                  |                           |
| North America       | 7           | 0.81 (0.73-0.89) | 0.495                     |
| South America       | 1           | 0.71 (0.54-0.94) |                           |
| Population          |             |                  |                           |
| Hemodialysis        | 4           | 0.78 (0.70-0.86) | 0.676                     |
| Peritoneal dialysis | 1           | 0.71 (0.54-0.94) |                           |
| Mixed               | 3           | 0.83 (0.70-0.99) |                           |
| Risk of bias        |             |                  |                           |
| Low                 | 8           | 0.81 (0.73-0.89) | 0.495                     |
| Moderate            | 1           | 0.71 (0.54-0.94) |                           |

**Suppl. Table S16.** Subgroup analysis of the meta-analysis regarding female patients and dialysis mortality.

| Subgroup            | Studies no. | HR (95% CI)      | P for subgroup difference |
|---------------------|-------------|------------------|---------------------------|
| Study location      |             |                  |                           |
| North America       | 2           | 0.98 (0.95-1.01) | 0.663                     |
| South America       | 1           | 0.97 (0.90-1.05) |                           |
| Europe              | 10          | 0.96 (0.93-1.00) |                           |
| Asia                | 8           | 1.02 (0.87-1.21) |                           |
| Oceania             | 4           | 1.05 (0.95-1.15) |                           |
| Africa              | 1           | 1.12 (0.75-1.68) |                           |
| Population          |             |                  |                           |
| Hemodialysis        | 3           | 0.88 (0.73-1.05) | 0.203                     |
| Peritoneal dialysis | 11          | 1.00 (0.91-1.09) |                           |
| Mixed               | 12          | 1.02 (0.96-1.08) |                           |
| Risk of bias        |             |                  |                           |
| Low                 | 14          | 0.98 (0.92-1.04) | 0.815                     |
| Moderate            | 6           | 0.98 (0.96-1.00) |                           |
| Serious             | 6           | 0.98 (0.80-1.20) |                           |

**Suppl. Table S17.** Subgroup analysis of the meta-analysis regarding low socioeconomic status and dialysis mortality.

| Subgroup            | Studies no. | HR (95% CI)      | P for subgroup difference |
|---------------------|-------------|------------------|---------------------------|
| Study location      |             |                  |                           |
| North America       | 4           | 1.10 (1.06-1.15) | <0.001                    |
| South America       | 4           | 1.28 (1.14-1.43) |                           |
| Europe              | 4           | 1.20 (1.10-1.31) |                           |
| Asia                | 8           | 1.62 (1.23-2.14) |                           |
| Oceania             | 3           | 1.12 (1.06-1.19) |                           |
| Population          |             |                  |                           |
| Hemodialysis        | 10          | 1.16 (1.09-1.25) | 0.207                     |
| Peritoneal dialysis | 8           | 1.41 (1.11-1.79) |                           |
| Mixed               | 5           | 1.12 (1.06-1.19) |                           |
| Risk of bias        |             |                  |                           |
| Low                 | 18          | 1.16 (1.11-1.22) | <0.001                    |
| Moderate            | 5           | 2.12 (1.58-2.85) |                           |

**Suppl. Table S18.** Subgroup analysis of the meta-analysis regarding Black patients and waitlisting.

| Subgroup       | Studies no. | OR (95% CI)      | P for subgroup difference |
|----------------|-------------|------------------|---------------------------|
| Study location |             |                  |                           |
| North America  | 5           | 0.78 (0.68-0.90) | 0.426                     |
| Europe         | 2           | 0.85 (0.46-1.56) |                           |
| Risk of bias   |             |                  |                           |
| Low            | 5           | 0.84 (0.77-0.92) | 0.242                     |
| Moderate       | 2           | 0.70 (0.47-1.04) |                           |

**Suppl. Table S19.** Subgroup analysis of the meta-analysis regarding Indigenous patients and waitlisting.

| Subgroup       | Studies no. | OR (95% CI)      | P for subgroup difference |
|----------------|-------------|------------------|---------------------------|
| Study location |             |                  |                           |
| North America  | 2           | 0.77 (0.61-0.99) | <0.001                    |
| Oceania        | 1           | 0.46 (0.38-0.55) |                           |
| Risk of bias   |             |                  |                           |
| Low            | 2           | 0.56 (0.36-0.87) | 0.366                     |
| Moderate       | 1           | 0.80 (0.59-1.08) |                           |

**Suppl. Table S20.** Subgroup analysis of the meta-analysis regarding female patients and waitlisting.

| Subgroup       | Studies no. | OR (95% CI)      | P for subgroup difference |
|----------------|-------------|------------------|---------------------------|
| Study location |             |                  |                           |
| North America  | 4           | 0.89 (0.88-0.90) | 0.560                     |
| Europe         | 9           | 0.89 (0.84-0.94) |                           |
| Oceania        | 1           | 0.85 (0.80-0.91) |                           |
| Risk of bias   |             |                  |                           |
| Low            | 10          | 0.88 (0.86-0.90) | 0.584                     |
| Moderate       | 4           | 0.89 (0.83-0.96) |                           |

**Suppl. Table S21.** Subgroup analysis of the meta-analysis regarding low socioeconomic status and waitlisting.

| Subgroup       | Studies no. | OR (95% CI)      | P for subgroup difference |
|----------------|-------------|------------------|---------------------------|
| Study location |             |                  |                           |
| North America  | 5           | 0.55 (0.44-0.72) | 0.587                     |
| Europe         | 6           | 0.60 (0.54-0.65) |                           |
| Risk of bias   |             |                  |                           |
| Low            | 7           | 0.55 (0.44-0.66) | 0.289                     |
| Moderate       | 4           | 0.64 (0.55-0.74) |                           |

**Suppl. Table S22.** Subgroup analysis of the meta-analysis regarding Indigenous patients and kidney transplantation.

| Subgroup       | Studies no. | OR (95% CI)      | P for subgroup difference |
|----------------|-------------|------------------|---------------------------|
| Study location |             |                  |                           |
| North America  | 4           | 0.48 (0.36-0.63) | 0.001                     |
| Oceania        | 3           | 0.25 (0.21-0.31) |                           |
| Risk of bias   |             |                  |                           |
| Low            | 6           | 0.38 (0.27-0.53) | 0.733                     |
| Moderate       | 1           | 0.32 (0.25-0.40) |                           |

**Suppl. Table S23.** Subgroup analysis of the meta-analysis regarding female patients and kidney transplantation.

| Subgroup       | Studies no. | OR (95% CI)      | P for subgroup difference |
|----------------|-------------|------------------|---------------------------|
| Study location |             |                  |                           |
| North America  | 3           | 0.90 (0.81-0.99) | 0.574                     |
| Europe         | 4           | 0.94 (0.84-1.05) |                           |
| Risk of bias   |             |                  |                           |
| Low            | 5           | 0.90 (0.82-0.97) | 0.241                     |
| Moderate       | 2           | 1.00 (0.87-1.14) |                           |

**Suppl. Table S24.** Subgroup analysis of the meta-analysis regarding low socioeconomic status and kidney transplantation.

| Subgroup       | Studies no. | OR (95% CI)      | P for subgroup difference |
|----------------|-------------|------------------|---------------------------|
| Study location |             |                  |                           |
| North America  | 3           | 0.63 (0.56-0.69) | 0.015                     |
| Europe         | 2           | 0.81 (0.68-0.95) |                           |
| Asia           | 1           | 0.40 (0.24-0.67) |                           |
| Oceania        | 1           | 0.94 (0.54-1.64) |                           |
| South America  | 1           | 0.59 (0.20-1.73) |                           |
| Risk of bias   |             |                  |                           |
| Low            | 6           | 0.63 (0.56-0.72) | 0.012                     |
| Moderate       | 2           | 0.89 (0.75-1.06) |                           |

**Suppl. Table S25.** Subgroup analysis of the meta-analysis regarding Black patients and living-donor transplantation.

| Subgroup       | Studies no. | OR (95% CI)      | P for subgroup difference |
|----------------|-------------|------------------|---------------------------|
| Study location |             |                  |                           |
| North America  | 6           | 0.41 (0.30-0.56) | 0.964                     |
| Europe         | 1           | 0.40 (0.21-0.75) |                           |
| Risk of bias   |             |                  |                           |
| Low            | 5           | 0.35 (0.29-0.42) | 0.015                     |
| Moderate       | 2           | 0.59 (0.29-1.20) |                           |



**Suppl. Table S26.** Subgroup analysis of the meta-analysis regarding Asian patients and living-donor transplantation.

| <b>Subgroup</b>       | <b>Studies no.</b> | <b>OR (95% CI)</b> | <b>P for subgroup difference</b> |
|-----------------------|--------------------|--------------------|----------------------------------|
| <b>Study location</b> |                    |                    |                                  |
| <i>North America</i>  | 3                  | 0.36 (0.24-0.55)   | 0.161                            |
| <i>Europe</i>         | 1                  | 0.66 (0.45-0.96)   |                                  |
| <b>Risk of bias</b>   |                    |                    |                                  |
| <i>Low</i>            | 3                  | 0.36 (0.24-0.55)   | 0.161                            |
| <i>Moderate</i>       | 1                  | 0.66 (0.45-0.96)   |                                  |

**Suppl. Table S27.** Subgroup analysis of the meta-analysis regarding Indigenous patients and living-donor transplantation.

| <b>Subgroup</b>       | <b>Studies no.</b> | <b>OR (95% CI)</b> | <b>P for subgroup difference</b> |
|-----------------------|--------------------|--------------------|----------------------------------|
| <b>Study location</b> |                    |                    |                                  |
| <i>North America</i>  | 4                  | 0.41 (0.37-0.44)   | <0.001                           |
| <i>Europe</i>         | 3                  | 0.19 (0.13-0.28)   |                                  |

**Suppl. Table S28.** Subgroup analysis of the meta-analysis regarding female patients and living-donor transplantation.

| <b>Subgroup</b>       | <b>Studies no.</b> | <b>OR (95% CI)</b> | <b>P for subgroup difference</b> |
|-----------------------|--------------------|--------------------|----------------------------------|
| <b>Study location</b> |                    |                    |                                  |
| <i>North America</i>  | 1                  | 1.06 (0.74-1.52)   | N/A                              |
| <i>Europe</i>         | 1                  | 0.94 (0.74-1.20)   |                                  |
| <i>Oceania</i>        | 1                  | 0.84 (0.75-0.95)   |                                  |
| <b>Risk of bias</b>   |                    |                    |                                  |
| <i>Low</i>            | 2                  | 0.88 (0.73-1.07)   | 0.738                            |
| <i>Moderate</i>       | 1                  | 0.94 (0.74-1.20)   |                                  |

**Suppl. Table S29.** Subgroup analysis of the meta-analysis regarding low socioeconomic status and living-donor transplantation.

| <b>Subgroup</b>       | <b>Studies no.</b> | <b>OR (95% CI)</b> | <b>P for subgroup difference</b> |
|-----------------------|--------------------|--------------------|----------------------------------|
| <b>Study location</b> |                    |                    |                                  |
| <i>North America</i>  | 1                  | 0.59 (0.38-0.92)   | 0.229                            |
| <i>Europe</i>         | 2                  | 0.42 (0.36-0.49)   |                                  |
| <i>Oceania</i>        | 1                  | 0.79 (0.25-2.50)   |                                  |
| <b>Risk of bias</b>   |                    |                    |                                  |
| <i>Low</i>            | 1                  | 0.59 (0.38-0.92)   | 0.176                            |
| <i>Moderate</i>       | 3                  | 0.43 (0.37-0.50)   |                                  |
| <b>Exposure</b>       |                    |                    |                                  |
| <i>Low income</i>     | 3                  | 0.48 (0.34-0.69)   | 0.873                            |
| <i>Low education</i>  | 1                  | 0.46 (0.36-0.59)   |                                  |

**Suppl. Table S30.** Subgroup analysis of the meta-analysis regarding Black patients and deceased-donor transplantation.

| Subgroup              | Studies no. | OR (95% CI)      | P for subgroup difference |
|-----------------------|-------------|------------------|---------------------------|
| <b>Study location</b> |             |                  |                           |
| <i>North America</i>  | 5           | 0.74 (0.45-1.22) | 0.684                     |
| <i>Europe</i>         | 1           | 0.95 (0.80-1.13) |                           |
| <b>Risk of bias</b>   |             |                  |                           |
| <i>Low</i>            | 4           | 0.85 (0.49-1.46) | 0.550                     |
| <i>Moderate</i>       | 2           | 0.63 (0.28-1.44) |                           |

**Suppl. Table S31.** Subgroup analysis of the meta-analysis regarding Asian patients and deceased-donor transplantation.

| Subgroup              | Studies no. | OR (95% CI)      | P for subgroup difference |
|-----------------------|-------------|------------------|---------------------------|
| <b>Study location</b> |             |                  |                           |
| <i>North America</i>  | 2           | 0.79 (0.54-1.16) | 0.302                     |
| <i>Europe</i>         | 1           | 1.12 (1.00-1.25) |                           |
| <b>Risk of bias</b>   |             |                  |                           |
| <i>Low</i>            | 2           | 0.79 (0.54-1.16) | 0.302                     |
| <i>Moderate</i>       | 1           | 1.12 (1.00-1.25) |                           |

**Suppl. Table S32.** Subgroup analysis of the meta-analysis regarding Indigenous patients and deceased-donor transplantation.

| Subgroup              | Studies no. | OR (95% CI)      | P for subgroup difference |
|-----------------------|-------------|------------------|---------------------------|
| <b>Study location</b> |             |                  |                           |
| <i>North America</i>  | 4           | 0.47 (0.36-0.61) | <b>0.019</b>              |
| <i>Oceania</i>        | 2           | 0.27 (0.19-0.39) |                           |

**Suppl. Table S33.** Subgroup analysis of the meta-analysis regarding female patients and deceased-donor transplantation.

| Subgroup              | Studies no. | OR (95% CI)      | P for subgroup difference |
|-----------------------|-------------|------------------|---------------------------|
| <b>Study location</b> |             |                  |                           |
| <i>North America</i>  | 1           | 0.78 (0.58-1.04) | N/A                       |
| <i>Europe</i>         | 1           | 0.60 (0.53-0.67) |                           |
| <i>Oceania</i>        | 1           | 1.03 (0.47-2.26) |                           |
| <b>Risk of bias</b>   |             |                  |                           |
| <i>Low</i>            | 1           | 0.78 (0.58-1.04) | 0.709                     |
| <i>Moderate</i>       | 2           | 0.68 (0.44-1.06) |                           |

**Suppl. Table S34.** Subgroup analysis of the meta-analysis regarding low socioeconomic status and preemptive transplantation.

| Subgroup              | Studies no. | OR (95% CI)      | <i>P</i> for subgroup difference |
|-----------------------|-------------|------------------|----------------------------------|
| <b>Study location</b> |             |                  |                                  |
| <i>North America</i>  | 1           | 0.84 (0.81-0.87) | 0.526                            |
| <i>Europe</i>         | 2           | 0.40 (0.10-1.53) |                                  |

**Suppl. Table S35.** Subgroup analysis of the meta-analysis regarding Black patients and graft failure.

| Subgroup       | Studies no. | HR (95% CI)      | P for subgroup difference |
|----------------|-------------|------------------|---------------------------|
| Study location |             |                  |                           |
| North America  | 6           | 1.43 (1.26-1.62) | 0.619                     |
| Europe         | 2           | 1.62 (0.91-2.87) |                           |
| Risk of bias   |             |                  |                           |
| Low            | 5           | 1.35 (1.23-1.47) | 0.004                     |
| Moderate       | 3           | 1.79 (1.65-1.95) |                           |

**Suppl. Table S36.** Subgroup analysis of the meta-analysis regarding Indigenous patients and graft failure.

| Subgroup              | Studies no. | HR (95% CI)      | <i>P</i> for subgroup difference |
|-----------------------|-------------|------------------|----------------------------------|
| <b>Study location</b> |             |                  |                                  |
| <i>North America</i>  | 2           | 1.13 (0.40-3.16) | 0.615                            |
| <i>Oceania</i>        | 1           | 1.53 (0.85-2.76) |                                  |

**Suppl. Table S37.** Subgroup analysis of the meta-analysis regarding Hispanic patients and graft failure.

| Subgroup            | Studies no. | HR (95% CI)      | <i>P</i> for subgroup difference |
|---------------------|-------------|------------------|----------------------------------|
| <b>Risk of bias</b> |             |                  |                                  |
| <i>Low</i>          | 3           | 0.83 (0.73-0.95) | 0.248                            |
| <i>Moderate</i>     | 2           | 1.07 (0.59-1.91) |                                  |

**Suppl. Table S38.** Subgroup analysis of the meta-analysis regarding female patients and graft failure.

| Subgroup              | Studies no. | HR (95% CI)      | P for subgroup difference |
|-----------------------|-------------|------------------|---------------------------|
| <b>Study location</b> |             |                  |                           |
| <i>North America</i>  | 4           | 0.99 (0.91-1.08) | 0.995                     |
| <i>Europe</i>         | 1           | 0.99 (0.73-1.35) |                           |
| <b>Risk of bias</b>   |             |                  |                           |
| <i>Low</i>            | 3           | 1.02 (0.92-1.13) | 0.361                     |
| <i>Moderate</i>       | 2           | 0.94 (0.91-0.97) |                           |

**Suppl. Table S39.** Subgroup analysis of the meta-analysis regarding low socioeconomic status and graft failure.

| Subgroup              | Studies no. | HR (95% CI)      | P for subgroup difference |
|-----------------------|-------------|------------------|---------------------------|
| <b>Study location</b> |             |                  |                           |
| <i>North America</i>  | 7           | 1.15 (0.96-1.37) | 0.389                     |
| <i>Europe</i>         | 2           | 1.06 (0.94-1.20) |                           |
| <i>Asia</i>           | 2           | 1.28 (1.17-1.41) |                           |
| <b>Risk of bias</b>   |             |                  |                           |
| <i>Low</i>            | 6           | 1.18 (1.07-1.31) | 0.128                     |
| <i>Moderate</i>       | 4           | 1.05 (0.86-1.28) |                           |
| <i>Serious</i>        | 1           | 1.49 (1.22-1.82) |                           |
| <b>Exposure</b>       |             |                  |                           |
| <i>Low income</i>     | 5           | 1.08 (0.91-1.28) | 0.220                     |
| <i>Low education</i>  | 4           | 1.14 (1.01-1.28) |                           |
| <i>Unemployment</i>   | 2           | 1.34 (1.15-1.58) |                           |

**Suppl. Table S40.** Subgroup analysis of the meta-analysis regarding Black patients and kidney transplantation mortality.

| Subgroup            | Studies no. | HR (95% CI)      | P for subgroup difference |
|---------------------|-------------|------------------|---------------------------|
| <b>Risk of bias</b> |             |                  |                           |
| <i>Low</i>          | 3           | 0.93 (0.77-1.12) | 0.499                     |
| <i>Moderate</i>     | 1           | 1.06 (0.94-1.19) |                           |

**Suppl. Table S41.** Subgroup analysis of the meta-analysis regarding female patients and kidney transplantation mortality.

| <b>Subgroup</b>       | <b>Studies no.</b> | <b>HR (95% CI)</b> | <b>P for subgroup difference</b> |
|-----------------------|--------------------|--------------------|----------------------------------|
| <b>Study location</b> |                    |                    |                                  |
| <i>North America</i>  | 2                  | 0.87 (0.84-0.90)   | 0.366                            |
| <i>Europe</i>         | 1                  | 0.78 (0.62-0.99)   |                                  |

**Suppl. Table S42.** Subgroup analysis of the meta-analysis regarding low socioeconomic status and kidney transplantation mortality.

| <b>Subgroup</b>       | <b>Studies no.</b> | <b>HR (95% CI)</b> | <b>P for subgroup difference</b> |
|-----------------------|--------------------|--------------------|----------------------------------|
| <b>Study location</b> |                    |                    |                                  |
| <i>North America</i>  | 6                  | 1.12 (1.05-1.19)   | 0.090                            |
| <i>Europe</i>         | 2                  | 0.92 (0.69-1.25)   |                                  |
| <i>Asia</i>           | 2                  | 1.35 (0.94-1.94)   |                                  |
| <i>Oceania</i>        | 1                  | 0.64 (0.37-1.09)   |                                  |
| <b>Risk of bias</b>   |                    |                    |                                  |
| <i>Low</i>            | 7                  | 1.11 (0.94-1.31)   | 0.405                            |
| <i>Moderate</i>       | 3                  | 0.90 (0.60-1.36)   |                                  |
| <b>Exposure</b>       |                    |                    |                                  |
| <i>Low income</i>     | 7                  | 1.01 (0.78-1.32)   | 0.961                            |
| <i>Low education</i>  | 3                  | 1.10 (1.02-1.18)   |                                  |
| <i>Unemployment</i>   | 1                  | 1.12 (0.86-1.46)   |                                  |

## Supplementary S8: Sensitivity analysis

Suppl. Table S43. Meta-analysis outcomes of studies conducted in the USA.

| Outcome                                | Black race              | Asian race              | Indigenous people       | Hispanic ethnicity      | Female sex              | Low SES                 |
|----------------------------------------|-------------------------|-------------------------|-------------------------|-------------------------|-------------------------|-------------------------|
| <i>AVF/AVG vs. CVC</i>                 | <b>1.08 (1.07-1.10)</b> | <b>1.11 (1.08-1.15)</b> | 1.04 (0.98-1.10)        | -                       | <b>0.85 (0.84-0.86)</b> | 0.84 (0.69-1.03)        |
| <i>AVF vs. AVG</i>                     | <b>0.58 (0.51-0.66)</b> | -                       | <b>1.30 (1.12-1.51)</b> | -                       | <b>0.43 (0.38-0.47)</b> | -                       |
| <i>Successful AVF use</i>              | <b>0.88 (0.83-0.93)</b> | -                       | -                       | -                       | <b>0.82 (0.76-0.88)</b> | -                       |
| <i>Primary AVF patency</i>             | <b>0.87 (0.86-0.88)</b> | -                       | -                       | -                       | <b>0.79 (0.72-0.87)</b> | -                       |
| <i>Transition to AVF/AVG</i>           | 1.06 (0.92-1.22)        | -                       | -                       | -                       | <b>0.92 (0.85-1.00)</b> | <b>0.80 (0.73-0.88)</b> |
| <i>Home dialysis</i>                   | 0.91 (0.74-1.12)        | <b>0.64 (0.41-1.00)</b> | -                       | -                       | -                       | -                       |
| <i>Peritoneal dialysis</i>             | <b>0.58 (0.46-0.73)</b> | 1.02 (0.98-1.07)        |                         |                         | 1.06 (0.97-1.17)        | <b>0.47 (0.40-0.55)</b> |
| <i>Dialysis survival</i>               | <b>0.74 (0.68-0.81)</b> | <b>0.62 (0.51-0.77)</b> | <b>0.69 (0.67-0.71)</b> | <b>0.81 (0.73-0.89)</b> | 0.98 (0.96-1.01)        | <b>1.11 (1.06-1.17)</b> |
| <i>Waitlisting</i>                     | <b>0.78 (0.68-0.90)</b> | <b>1.20 (1.18-1.22)</b> | <b>0.77 (0.61-0.99)</b> | 1.09 (0.87-1.37)        | <b>0.89 (0.88-0.90)</b> | <b>0.55 (0.44-0.72)</b> |
| <i>Kidney transplantation</i>          | 0.74 (0.48-1.14)        | <b>0.49 (0.41-0.59)</b> | <b>0.44 (0.42-0.47)</b> | 1.10 (0.51-2.37)        | 0.95 (0.81-1.11)        | <b>0.65 (0.64-0.66)</b> |
| <i>Living-donor transplantation</i>    | <b>0.48 (0.29-0.79)</b> | <b>0.49 (0.43-0.55)</b> | <b>0.40 (0.36-0.44)</b> | 1.22 (0.57-5.60)        | 1.06 (0.74-1.52)        | <b>0.59 (0.38-0.92)</b> |
| <i>Deceased-donor transplantation</i>  | 0.77 (0.40-1.49)        | <b>0.95 (0.91-0.99)</b> | <b>0.52 (0.46-0.60)</b> | 1.23 (0.40-3.75)        | <b>0.94 (0.93-0.95)</b> | 0.78 (0.58-1.04)        |
| <i>Preemptive transplantation</i>      | <b>0.46 (0.44-0.49)</b> | -                       | -                       | -                       | <b>1.40 (1.35-1.45)</b> | <b>0.84 (0.81-0.87)</b> |
| <i>Graft survival</i>                  | <b>1.43 (1.26-1.62)</b> | -                       | 1.13 (0.40-3.16)        | 0.90 (0.68-1.20)        | 0.99 (0.91-1.08)        | 1.16 (0.94-1.44)        |
| <i>Kidney transplantation survival</i> | 0.96 (0.83-1.12)        | -                       | -                       | <b>0.69 (0.66-0.71)</b> | <b>0.87 (0.84-0.90)</b> | <b>1.11 (1.04-1.18)</b> |

Effect estimates are odds ratios or hazard ratios (95% confidence intervals). Bolt text indicated statistical significance.

SES: socioeconomic status; AVF: arteriovenous fistula; AVG: arteriovenous graft

## Supplementary S9: Summary of findings

**Suppl. Table S44.** Summary of findings and certainty of evidence assessment

| GRADE                                                          |         |                  |           |                          |                   |                    |                  |                         |                              |
|----------------------------------------------------------------|---------|------------------|-----------|--------------------------|-------------------|--------------------|------------------|-------------------------|------------------------------|
|                                                                | Studies | ES (95% CI)      | 95% PI    | <i>Study limitations</i> | <i>Directness</i> | <i>Consistency</i> | <i>Precision</i> | <i>Publication bias</i> | <i>Certainty of evidence</i> |
| <b>Dialysis</b>                                                |         |                  |           |                          |                   |                    |                  |                         |                              |
| <b>Mortality</b>                                               |         |                  |           |                          |                   |                    |                  |                         |                              |
| Black race                                                     | 18      | 0.68 (0.61-0.75) | 0.61-0.75 | Low risk                 | Yes               | No                 | Yes              | Undetected              | <b><i>Moderate</i></b>       |
| Asian race                                                     | 12      | 0.67 (0.61-0.72) | 0.52-0.85 | Moderate risk            | Yes               | Yes                | Yes              | Undetected              | <b><i>Moderate</i></b>       |
| Indigenous race                                                | 11      | 1.02 (0.85-1.23) | 0.56-1.89 | Low risk                 | Yes               | No                 | No               | Undetected              | <b><i>Low</i></b>            |
| Hispanic ethnicity                                             | 8       | 0.80 (0.73-0.88) | 0.63-1.02 | Low risk                 | Yes               | No                 | Yes              | Undetected              | <b><i>Moderate</i></b>       |
| Female sex                                                     | 26      | 0.99 (0.95-1.04) | 0.84-1.17 | Moderate risk            | Yes               | No                 | Yes              | Undetected              | <b><i>Low</i></b>            |
| Low SES                                                        | 23      | 1.22 (1.14-1.31) | 0.95-1.57 | Moderate risk            | Yes               | No                 | Yes              | Suspected               | <b><i>Very Low</i></b>       |
| <b>Arteriovenous fistula/graft vs. Central venous catheter</b> |         |                  |           |                          |                   |                    |                  |                         |                              |
| Black race                                                     | 2       | 1.08 (1.07-1.10) | 1.07-1.10 | Low risk                 | Yes               | Yes                | Yes              | Undetected              | <b><i>High</i></b>           |
| Asian race                                                     | 2       | 1.04 (0.76-1.44) | 0.65-1.66 | Low risk                 | Yes               | Yes                | No               | Undetected              | <b><i>Moderate</i></b>       |
| Indigenous race                                                | 3       | 0.93 (0.82-1.07) | 0.73-1.20 | Low risk                 | Yes               | No                 | Yes              | Undetected              | <b><i>Moderate</i></b>       |
| Female sex                                                     | 5       | 0.81 (0.69-0.95) | 0.57-1.15 | Low risk                 | Yes               | No                 | Yes              | Suspected               | <b><i>Low</i></b>            |
| Low SES                                                        | 5       | 0.81 (0.65-1.00) | 0.52-1.26 | Low risk                 | Yes               | No                 | Yes              | Suspected               | <b><i>Low</i></b>            |
| <b>Arteriovenous fistula vs. graft</b>                         |         |                  |           |                          |                   |                    |                  |                         |                              |
| Black race                                                     | 4       | 0.58 (0.51-0.66) | 0.45-0.75 | Low risk                 | Yes               | Yes                | Yes              | Undetected              | <b><i>High</i></b>           |
| Indigenous race                                                | 2       | 0.93 (0.42-2.09) | 0.25-3.44 | Low risk                 | Yes               | No                 | No               | Undetected              | <b><i>Low</i></b>            |
| Female sex                                                     | 5       | 0.43 (0.39-0.47) | 0.36-0.51 | Low risk                 | Yes               | Yes                | Yes              | Undetected              | <b><i>High</i></b>           |
| <b>Successful arteriovenous fistula use</b>                    |         |                  |           |                          |                   |                    |                  |                         |                              |
| Black race                                                     | 2       | 0.89 (0.84-0.94) | 0.84-0.94 | Low risk                 | Yes               | Yes                | Yes              | Undetected              | <b><i>High</i></b>           |
| Female sex                                                     | 3       | 0.64 (0.40-1.02) | 0.26-1.59 | Low risk                 | Yes               | No                 | No               | Suspected               | <b><i>Very Low</i></b>       |

|                                                  |    |                  |           |               |     |     |     |            |                 |
|--------------------------------------------------|----|------------------|-----------|---------------|-----|-----|-----|------------|-----------------|
| <b>Primary arteriovenous fistula patency</b>     |    |                  |           |               |     |     |     |            |                 |
| Black race                                       | 2  | 0.87 (0.86-0.88) | 0.86-0.88 | Low risk      | Yes | Yes | Yes | Undetected | <i>High</i>     |
| Female sex                                       | 4  | 0.73 (0.56-0.96) | 0.72-0.87 | Low risk      | Yes | No  | No  | Undetected | <i>Low</i>      |
| Low SES                                          | 3  | 0.77 (0.65-0.91) | 0.65-0.91 | Moderate risk | Yes | Yes | Yes | Undetected | <i>Moderate</i> |
| <b>Transition to arteriovenous fistula/graft</b> |    |                  |           |               |     |     |     |            |                 |
| Black race                                       | 2  | 1.06 (0.92-1.22) | 0.84-1.34 | Low risk      | Yes | No  | No  | Undetected | <i>Low</i>      |
| Female sex                                       | 2  | 0.92 (0.85-1.00) | 0.80-1.06 | Low risk      | Yes | No  | Yes | Undetected | <i>Moderate</i> |
| Low SES                                          | 2  | 0.80 (0.73-0.88) | 0.73-0.88 | Moderate risk | Yes | Yes | Yes | Undetected | <i>Moderate</i> |
| <b>Home dialysis</b>                             |    |                  |           |               |     |     |     |            |                 |
| Black race                                       | 2  | 1.00 (0.83-1.21) | 0.78-1.28 | Low risk      | Yes | Yes | Yes | Undetected | <i>High</i>     |
| Asian race                                       | 2  | 0.86 (0.52-1.42) | 0.39-1.91 | Low risk      | Yes | No  | No  | Undetected | <i>Low</i>      |
| <b>Peritoneal dialysis</b>                       |    |                  |           |               |     |     |     |            |                 |
| Black race                                       | 5  | 0.65 (0.49-0.88) | 0.33-1.30 | Moderate risk | Yes | No  | Yes | Undetected | <i>Low</i>      |
| Asian race                                       | 3  | 1.28 (1.00-1.64) | 0.78-2.09 | Low risk      | Yes | No  | No  | Undetected | <i>Low</i>      |
| Indigenous race                                  | 2  | 0.83 (0.61-1.14) | 0.48-1.43 | Low risk      | Yes | No  | No  | Undetected | <i>Low</i>      |
| Female sex                                       | 7  | 1.07 (0.92-1.25) | 0.74-1.55 | Moderate risk | Yes | No  | Yes | Undetected | <i>Low</i>      |
| Low SES                                          | 5  | 0.56 (0.44-0.70) | 0.38-0.89 | Moderate risk | Yes | No  | Yes | Undetected | <i>Low</i>      |
| <b><u>Kidney transplantation</u></b>             |    |                  |           |               |     |     |     |            |                 |
| <b>Waitlisting</b>                               |    |                  |           |               |     |     |     |            |                 |
| Black race                                       | 7  | 0.80 (0.70-0.91) | 0.59-1.09 | Low risk      | Yes | No  | Yes | Undetected | <i>Moderate</i> |
| Asian race                                       | 2  | 1.25 (1.08-1.44) | 1.01-1.55 | Low risk      | Yes | Yes | No  | Undetected | <i>Moderate</i> |
| Indigenous race                                  | 3  | 0.63 (0.44-0.91) | 0.32-1.22 | Low risk      | Yes | No  | No  | Undetected | <i>Low</i>      |
| Hispanic ethnicity                               | 3  | 1.09 (0.87-1.37) | 0.70-1.69 | Low risk      | Yes | No  | No  | Undetected | <i>Low</i>      |
| Female sex                                       | 14 | 0.89 (0.87-0.90) | 0.87-0.91 | Low risk      | Yes | Yes | Yes | Undetected | <i>High</i>     |
| Low SES                                          | 11 | 0.58 (0.51-0.66) | 0.41-0.82 | Low risk      | Yes | No  | Yes | Undetected | <i>Moderate</i> |
| <b>Kidney transplantation</b>                    |    |                  |           |               |     |     |     |            |                 |
| Black race                                       | 5  | 0.70 (0.49-0.99) | 0.31-1.58 | Low risk      | Yes | No  | No  | Undetected | <i>Low</i>      |



|                                       |   |                  |            |               |     |     |     |            |                 |
|---------------------------------------|---|------------------|------------|---------------|-----|-----|-----|------------|-----------------|
| Asian race                            | 2 | 0.59 (0.42-0.82) | 0.33-1.02  | Low risk      | Yes | No  | No  | Undetected | <i>Low</i>      |
| Indigenous race                       | 7 | 0.37 (0.27-0.50) | 0.16-0.85  | Low risk      | Yes | No  | Yes | Undetected | <i>Moderate</i> |
| Hispanic ethnicity                    | 2 | 1.10 (0.51-2.37) | 0.30-3.99  | Low risk      | Yes | No  | No  | Undetected | <i>Very Low</i> |
| Female sex                            | 7 | 0.91 (0.85-0.98) | 0.77-1.08  | Low risk      | Yes | No  | Yes | Undetected | <i>Moderate</i> |
| Low SES                               | 8 | 0.68 (0.58-0.79) | 0.47-0.97  | Low risk      | Yes | No  | Yes | Undetected | <i>Moderate</i> |
| <b>Living-donor transplantation</b>   |   |                  |            |               |     |     |     |            |                 |
| Black race                            | 7 | 0.40 (0.31-0.50) | 0.24-0.68  | Low risk      | Yes | Yes | Yes | Undetected | <i>High</i>     |
| Asian race                            | 4 | 0.42 (0.28-0.62) | 0.18-0.95  | Low risk      | Yes | No  | No  | Undetected | <i>Low</i>      |
| Indigenous race                       | 7 | 0.31 (0.22-0.43) | 0.13-0.74  | Low risk      | Yes | No  | Yes | Suspected  | <i>Low</i>      |
| Hispanic ethnicity                    | 3 | 1.22 (0.27-5.60) | 0.10-15.28 | Low risk      | Yes | No  | No  | Undetected | <i>Low</i>      |
| Female sex                            | 3 | 0.88 (0.79-0.98) | 0.77-0.99  | Moderate risk | Yes | Yes | Yes | Undetected | <i>Moderate</i> |
| Low SES                               | 4 | 0.45 (0.38-0.54) | 0.36-0.57  | Moderate risk | Yes | Yes | Yes | Undetected | <i>Moderate</i> |
| <b>Deceased-donor transplantation</b> |   |                  |            |               |     |     |     |            |                 |
| Black race                            | 6 | 0.77 (0.51-1.16) | 0.27-2.21  | Low risk      | Yes | No  | No  | Undetected | <i>Low</i>      |
| Asian race                            | 3 | 0.89 (0.65-1.22) | 0.48-1.64  | Low risk      | Yes | No  | No  | Undetected | <i>Low</i>      |
| Indigenous race                       | 6 | 0.39 (0.29-0.53) | 0.18-0.85  | Low risk      | Yes | No  | No  | Undetected | <i>Low</i>      |
| Hispanic ethnicity                    | 2 | 1.23 (0.40-3.75) | 0.19-8.19  | Low risk      | Yes | No  | No  | Undetected | <i>Low</i>      |
| Female sex                            | 2 | 0.94 (0.93-0.95) | 0.93-0.95  | Low risk      | Yes | Yes | Yes | Undetected | <i>High</i>     |
| Low SES                               | 3 | 0.69 (0.54-0.89) | 0.46-1.03  | Moderate risk | Yes | No  | Yes | Undetected | <i>Low</i>      |
| <b>Preemptive transplantation</b>     |   |                  |            |               |     |     |     |            |                 |
| Black race                            | 2 | 0.46 (0.44-0.49) | 0.44-0.49  | Low risk      | Yes | Yes | Yes | Undetected | <i>High</i>     |
| Female sex                            | 2 | 1.16 (0.79-1.71) | 0.60-2.25  | Low risk      | Yes | No  | No  | Undetected | <i>Low</i>      |
| Low SES                               | 3 | 0.51 (0.21-1.28) | 0.08-3.15  | Low risk      | Yes | No  | No  | Undetected | <i>Low</i>      |
| <b>Graft failure</b>                  |   |                  |            |               |     |     |     |            |                 |
| Black race                            | 8 | 1.44 (1.27-1.63) | 1.07-1.94  | Low risk      | Yes | No  | Yes | Undetected | <i>Moderate</i> |
| Indigenous race                       | 3 | 1.42 (0.85-2.37) | 0.85-2.37  | Low risk      | Yes | Yes | No  | Undetected | <i>Moderate</i> |
| Hispanic ethnicity                    | 5 | 0.90 (0.68-1.20) | 0.49-1.68  | Low risk      | Yes | No  | No  | Undetected | <i>Low</i>      |

|                    |    |                  |           |          |     |     |     |            |                 |
|--------------------|----|------------------|-----------|----------|-----|-----|-----|------------|-----------------|
| Female sex         | 5  | 0.99 (0.92-1.07) | 0.85-1.15 | Low risk | Yes | No  | Yes | Undetected | <b>Moderate</b> |
| Low SES            | 11 | 1.17 (1.07-1.28) | 0.93-1.47 | Low risk | Yes | No  | Yes | Undetected | <b>Moderate</b> |
| <b>Mortality</b>   |    |                  |           |          |     |     |     |            |                 |
| Black race         | 4  | 0.96 (0.83-1.12) | 0.71-1.31 | Low risk | Yes | No  | Yes | Undetected | <b>Moderate</b> |
| Hispanic ethnicity | 2  | 0.69 (0.66-0.71) | 0.66-0.71 | Low risk | Yes | Yes | Yes | Undetected | <b>High</b>     |
| Female sex         | 3  | 0.87 (0.84-0.90) | 0.84-0.90 | Low risk | Yes | Yes | Yes | Undetected | <b>High</b>     |
| Low SES            | 11 | 1.06 (0.91-1.23) | 0.69-1.63 | Low risk | Yes | No  | Yes | Suspected  | <b>Low</b>      |

*ES: effect size; PI: prediction intervals; GRADE: Grading of Recommendations, Assessment, Development and Evaluations; SES: socioeconomic status*

## Supplementary S10: PRISMA checklist

| 1Section and Topic            | Item # | Checklist item                                                                                                                                                                                                                                                                                       | Location where item is reported |
|-------------------------------|--------|------------------------------------------------------------------------------------------------------------------------------------------------------------------------------------------------------------------------------------------------------------------------------------------------------|---------------------------------|
| <b>TITLE</b>                  |        |                                                                                                                                                                                                                                                                                                      |                                 |
| Title                         | 1      | Identify the report as a systematic review.                                                                                                                                                                                                                                                          | 1                               |
| <b>ABSTRACT</b>               |        |                                                                                                                                                                                                                                                                                                      |                                 |
| Abstract                      | 2      | See the PRISMA 2020 for Abstracts checklist.                                                                                                                                                                                                                                                         | 1                               |
| <b>INTRODUCTION</b>           |        |                                                                                                                                                                                                                                                                                                      |                                 |
| Rationale                     | 3      | Describe the rationale for the review in the context of existing knowledge.                                                                                                                                                                                                                          | 2                               |
| Objectives                    | 4      | Provide an explicit statement of the objective(s) or question(s) the review addresses.                                                                                                                                                                                                               | 2                               |
| <b>METHODS</b>                |        |                                                                                                                                                                                                                                                                                                      |                                 |
| Eligibility criteria          | 5      | Specify the inclusion and exclusion criteria for the review and how studies were grouped for the syntheses.                                                                                                                                                                                          | 2, 3                            |
| Information sources           | 6      | Specify all databases, registers, websites, organisations, reference lists and other sources searched or consulted to identify studies. Specify the date when each source was last searched or consulted.                                                                                            | 3                               |
| Search strategy               | 7      | Present the full search strategies for all databases, registers and websites, including any filters and limits used.                                                                                                                                                                                 | Appendix 1                      |
| Selection process             | 8      | Specify the methods used to decide whether a study met the inclusion criteria of the review, including how many reviewers screened each record and each report retrieved, whether they worked independently, and if applicable, details of automation tools used in the process.                     | 3                               |
| Data collection process       | 9      | Specify the methods used to collect data from reports, including how many reviewers collected data from each report, whether they worked independently, any processes for obtaining or confirming data from study investigators, and if applicable, details of automation tools used in the process. | 4                               |
| Data items                    | 10a    | List and define all outcomes for which data were sought. Specify whether all results that were compatible with each outcome domain in each study were sought (e.g. for all measures, time points, analyses), and if not, the methods used to decide which results to collect.                        | 2, 3                            |
|                               | 10b    | List and define all other variables for which data were sought (e.g. participant and intervention characteristics, funding sources). Describe any assumptions made about any missing or unclear information.                                                                                         | 4                               |
| Study risk of bias assessment | 11     | Specify the methods used to assess risk of bias in the included studies, including details of the tool(s) used, how many reviewers assessed each study and whether they worked independently, and if applicable, details of automation tools used in the process.                                    | 4                               |
| Effect measures               | 12     | Specify for each outcome the effect measure(s) (e.g. risk ratio, mean difference) used in the synthesis or presentation of results.                                                                                                                                                                  | 4                               |
| Synthesis methods             | 13a    | Describe the processes used to decide which studies were eligible for each synthesis (e.g. tabulating the study intervention characteristics and comparing against the planned groups for each synthesis (item #5)).                                                                                 | 4                               |
|                               | 13b    | Describe any methods required to prepare the data for presentation or synthesis, such as handling of missing summary statistics, or data conversions.                                                                                                                                                | 4                               |
|                               | 13c    | Describe any methods used to tabulate or visually display results of individual studies and syntheses.                                                                                                                                                                                               | 4                               |
|                               | 13d    | Describe any methods used to synthesize results and provide a rationale for the choice(s). If meta-analysis was performed, describe the model(s), method(s) to identify the presence and extent of statistical heterogeneity, and software package(s) used.                                          | 4                               |

| 1Section and Topic            | Item # | Checklist item                                                                                                                                                                                                                                                                       | Location where item is reported |
|-------------------------------|--------|--------------------------------------------------------------------------------------------------------------------------------------------------------------------------------------------------------------------------------------------------------------------------------------|---------------------------------|
|                               | 13e    | Describe any methods used to explore possible causes of heterogeneity among study results (e.g. subgroup analysis, meta-regression).                                                                                                                                                 | 4                               |
|                               | 13f    | Describe any sensitivity analyses conducted to assess robustness of the synthesized results.                                                                                                                                                                                         | 4                               |
| Reporting bias assessment     | 14     | Describe any methods used to assess risk of bias due to missing results in a synthesis (arising from reporting biases).                                                                                                                                                              | 4                               |
| Certainty assessment          | 15     | Describe any methods used to assess certainty (or confidence) in the body of evidence for an outcome.                                                                                                                                                                                | 4                               |
| <b>RESULTS</b>                |        |                                                                                                                                                                                                                                                                                      |                                 |
| Study selection               | 16a    | Describe the results of the search and selection process, from the number of records identified in the search to the number of studies included in the review, ideally using a flow diagram.                                                                                         | 5, Figure 1                     |
|                               | 16b    | Cite studies that might appear to meet the inclusion criteria, but which were excluded, and explain why they were excluded.                                                                                                                                                          | Appendix 2                      |
| Study characteristics         | 17     | Cite each included study and present its characteristics.                                                                                                                                                                                                                            | 5-6, Appendix 3                 |
| Risk of bias in studies       | 18     | Present assessments of risk of bias for each included study.                                                                                                                                                                                                                         | Appendix 4                      |
| Results of individual studies | 19     | For all outcomes, present, for each study: (a) summary statistics for each group (where appropriate) and (b) an effect estimate and its precision (e.g. confidence/credible interval), ideally using structured tables or plots.                                                     | Appendix 5                      |
| Results of syntheses          | 20a    | For each synthesis, briefly summarise the characteristics and risk of bias among contributing studies.                                                                                                                                                                               | 7-12                            |
|                               | 20b    | Present results of all statistical syntheses conducted. If meta-analysis was done, present for each the summary estimate and its precision (e.g. confidence/credible interval) and measures of statistical heterogeneity. If comparing groups, describe the direction of the effect. | 7-12                            |
|                               | 20c    | Present results of all investigations of possible causes of heterogeneity among study results.                                                                                                                                                                                       | Appendix 7                      |
|                               | 20d    | Present results of all sensitivity analyses conducted to assess the robustness of the synthesized results.                                                                                                                                                                           | Appendix 8                      |
| Reporting biases              | 21     | Present assessments of risk of bias due to missing results (arising from reporting biases) for each synthesis assessed.                                                                                                                                                              | NA                              |
| Certainty of evidence         | 22     | Present assessments of certainty (or confidence) in the body of evidence for each outcome assessed.                                                                                                                                                                                  | Appendix 9                      |
| <b>DISCUSSION</b>             |        |                                                                                                                                                                                                                                                                                      |                                 |
| Discussion                    | 23a    | Provide a general interpretation of the results in the context of other evidence.                                                                                                                                                                                                    | 12-14                           |
|                               | 23b    | Discuss any limitations of the evidence included in the review.                                                                                                                                                                                                                      | 14-15                           |
|                               | 23c    | Discuss any limitations of the review processes used.                                                                                                                                                                                                                                | 15                              |
|                               | 23d    | Discuss implications of the results for practice, policy, and future research.                                                                                                                                                                                                       | 15                              |
| <b>OTHER INFORMATION</b>      |        |                                                                                                                                                                                                                                                                                      |                                 |
| Registration and protocol     | 24a    | Provide registration information for the review, including register name and registration number, or state that the review was not registered.                                                                                                                                       | 2                               |
|                               | 24b    | Indicate where the review protocol can be accessed, or state that a protocol was not prepared.                                                                                                                                                                                       | 2                               |

| 1Section and Topic                             | Item # | Checklist item                                                                                                                                                                                                                             | Location where item is reported |
|------------------------------------------------|--------|--------------------------------------------------------------------------------------------------------------------------------------------------------------------------------------------------------------------------------------------|---------------------------------|
|                                                | 24c    | Describe and explain any amendments to information provided at registration or in the protocol.                                                                                                                                            | NA                              |
| Support                                        | 25     | Describe sources of financial or non-financial support for the review, and the role of the funders or sponsors in the review.                                                                                                              | 17                              |
| Competing interests                            | 26     | Declare any competing interests of review authors.                                                                                                                                                                                         | 17                              |
| Availability of data, code and other materials | 27     | Report which of the following are publicly available and where they can be found: template data collection forms; data extracted from included studies; data used for all analyses; analytic code; any other materials used in the review. | 17                              |

From: Page MJ, McKenzie JE, Bossuyt PM, Boutron I, Hoffmann TC, Mulrow CD, et al. The PRISMA 2020 statement: an updated guideline for reporting systematic reviews. *BMJ* 2021;372:n71. doi: 10.1136/bmj.n71

For more information, visit: <http://www.prisma-statement.org/>
